# Supplementary material for: Real-time monitoring of peptidoglycan synthesis by membrane-reconstituted penicillin-binding proteins
Source: eLife. 2021 Feb 24;10:e61525. doi: 10.7554/eLife.61525 (PMC7943195; doi:10.7554/eLife.61525)
Supplement: Figure 1—figure supplement 2—source data 1. [file elife-61525-fig1-figsupp2-data1.xlsx]

## Sheet: Fig1 - figure supp 2 panel A
wlD	obsD	fitD	donD	accD	bkD	resD	wlA	obsA	fitA	accA	bkA	resA
560	121.82	126.239	88.7933	0	37.4457	-4.41902	660	364.932	373.472	391.225	6	-8.53946
561	116.314	111.031	95.4282	0	15.6031	5.28276	661	368.609	361.13	380.774	7	7.47846
562	129.294	120.343	105.41	0	14.9323	8.95135	662	359.297	366.829	379.674	5	-7.53263
563	142.352	131.224	120.129	0	11.0952	11.1282	663	373.689	379.532	393.351	5	-5.84292
564	156.559	146.833	135.348	0	11.4846	9.72649	664	369.06	370.289	383.238	5	-1.22878
565	171.261	162.905	151.08	0	11.8245	8.35674	665	374.718	363.486	377.012	5	11.2322
566	181.835	175.299	164.347	0	10.9517	6.53619	666	371.005	370.063	383.574	5	0.941712
567	196.579	191.748	181.507	0	10.2412	4.83132	667	355.667	356.488	368.632	4	-0.820609
568	218.146	204.874	195.109	0	9.76572	13.272	668	358.911	363.625	374.273	4	-4.71384
569	226.102	220.308	209.521	0	10.7867	5.79389	669	345.469	355.025	368.514	5	-9.5564
570	248.798	229.835	218.337	0	11.4979	18.9635	670	348.419	343.704	352.594	3	4.71495
571	253.21	245.385	234.408	0	10.9771	7.82524	671	324.662	316.124	326.481	4	8.5374
572	269.176	257.396	246.053	0	11.343	11.7803	672	321.349	315.779	324.774	3	5.57072
573	278.357	268.553	258.397	0	10.155	9.80491	673	311.927	306.413	313.91	3	5.51372
574	289.165	275.76	264.552	0	11.2079	13.4053	674	291.713	295.027	304.787	3	-3.31421
575	290.45	283.265	272.799	0	10.4654	7.18522	675	278.849	277.75	287.066	3	1.0998
576	293.735	288.321	278.821	0	9.50027	5.41364	676	277.508	267.058	273.59	2	10.4503
577	301.26	297.066	285.811	0	11.2548	4.194	677	256.003	256.862	262.688	2	-0.858882
578	303.964	300.529	290.095	0	10.4337	3.43499	678	248.37	246.475	253.326	2	1.89524
579	303.256	296.794	286.911	0	9.88297	6.46173	679	231.29	233.463	239.615	2	-2.17306
580	305.087	296.397	286.542	0	9.85423	8.6905	680	222.3	220.998	226.747	2	1.30239
581	307.842	294.737	284.476	0	10.2616	13.1047	681	211.705	213.998	219.986	2	-2.29272
582	303.978	296.483	287.584	0	8.89925	7.49488	682	201.728	193.992	201.631	3	7.73614
583	284.538	294.713	284.191	0	10.5222	-10.1751	683	186.669	193.981	200.725	2	-7.31145
584	290.871	287.999	279.322	0	8.67657	2.87243	684	183.164	188.548	193.28	2	-5.38428
585	277.692	277.491	269.021	0	8.46999	0.200996	685	175.161	177.581	182.597	2	-2.41999
586	276.136	273.143	264.813	0	8.32953	2.99367	686	160.072	159.659	165.838	2	0.412778
587	259.179	273.394	264.53	0	8.86371	-14.2145	687	154.949	153.63	159.842	2	1.31872
588	257.166	261.357	252.486	0	8.87089	-4.19036	688	147.8	151.725	156.09	2	-3.92488
589	248.289	256.083	248.662	0	7.42132	-7.79438	689	145.297	145.843	149.195	1	-0.546235
590	239.85	241.086	232.327	0	8.75879	-1.23566	690	134.695	138.299	142.579	2	-3.60397
591	229.377	234.077	225.263	0	8.81459	-4.70082	691	133.822	124.487	128.801	2	9.33516
592	224.569	229.127	220.809	0	8.31778	-4.55786	692	123.823	114.495	119.927	2	9.32805
593	214.888	216.835	208.278	0	8.55625	-1.94693	693	113.662	113.562	119.569	2	0.100754
594	202.27	212.532	203.855	0	8.67716	-10.2619	694	108.029	107.274	110.432	1	0.75535
595	188.544	203.108	194.997	0	8.11166	-14.5646	695	97.2193	101.729	105.982	2	-4.50934
596	185.04	196.416	187.312	0	9.10452	-11.3764	696	102.208	98.4643	102.888	2	3.74377
597	178.036	189.327	179.884	0	9.4423	-11.2906	697	93.7205	95.4439	97.6717	1	-1.72342
598	171.092	174.405	166.843	0	7.56259	-3.31339	698	88.8552	85.6924	90.4894	2	3.16288
599	160.556	169.542	161.041	0	8.5004	-8.98588	699	86.1947	81.9548	86.2053	2	4.2399
600	156.415	167.237	157.864	0.109215	9.2637	-10.822	700	77.8167	81.7133	85.1865	1	-3.89653
601	149.155	157.146	148.786	0.109215	8.25015	-7.99077	701	76.4557	76.6364	79.4203	1	-0.180684
602	144.488	146.625	138.239	0.109215	8.27693	-2.1367	702	71.5261	70.2878	75.4743	2	1.23836
603	134.849	144.296	136.364	0.109215	7.8219	-9.44671	703	64.7645	67.0061	70.1977	1	-2.24159
604	129.026	135.286	127.539	0.109215	7.63778	-6.26	704	66.0495	65.4289	68.1677	1	0.620586
605	122.483	130.245	122.512	0.109215	7.62336	-7.76243	705	60.1923	66.7288	68.489	1	-6.5365
606	116.579	125.876	115.739	0.109215	10.0276	-9.29708	706	57.3335	59.9456	61.9812	1	-2.61212
607	112.205	119.71	110.908	0.109215	8.69328	-7.50513	707	58.5731	60.3044	62.1317	1	-1.73127
608	106.972	117.401	107.787	0.109215	9.50454	-10.4291	708	56.8939	55.4511	59.1886	1	1.44278
609	101.612	109.848	100.867	0.218431	8.76318	-8.23617	709	55.5037	50.7644	53.7285	1	4.73927
610	97.4509	104.445	96.3523	0.218431	7.87413	-6.99396	710	49.4535	53.4923	55.0097	1	-4.03884
611	96.9561	99.091	90.9196	0.218431	7.95298	-2.13491	711	48.0943	46.9273	49.1833	1	1.16708
612	90.8606	96.4513	88.5505	0.218431	7.68244	-5.59071	712	43.26	48.7314	50.01	0	-5.47139
613	82.4674	95.5119	86.0422	0.327646	9.14205	-13.0446	713	43.0504	50.3644	51.4363	0	-7.31391
614	83.6543	91.3132	81.6573	0.327646	9.32826	-7.65896	714	48.434	42.722	46.0928	1	5.71203
615	82.6632	88.5185	80.1922	0.436861	7.88946	-5.85529	715	43.8337	44.421	45.8023	0	-0.587271
616	80.2336	84.1812	77.0434	0.436861	6.70091	-3.94766	716	41.7046	44.8958	45.9331	0	-3.19123
617	76.8665	81.4577	72.2259	0.546076	8.68572	-4.59117	717	41.799	40.3586	41.7829	1	1.44034
618	76.7701	79.8129	71.7819	0.655292	7.37566	-3.04278	718	38.998	37.8434	39.4258	1	1.15459
619	73.665	79.5107	71.9169	0.764507	6.82928	-5.84567	719	39.7306	41.5553	42.8631	0	-1.82471
620	72.1722	73.8797	65.7555	0.873722	7.25042	-1.70745	720	34.3288	36.9027	39.7746	1	-2.57391
621	72.5952	73.2255	63.9872	1.09215	8.14614	-0.630289	721	37.4464	39.4115	40.4629	0	-1.96515
622	69.9933	70.2213	61.78	1.20137	7.23997	-0.228025	722	36.8983	36.935	38.8098	1	-0.0367045
623	66.2122	69.5772	60.3102	1.52901	7.73802	-3.365	723	32.7163	36.7448	38.9326	1	-4.02849
624	63.3602	69.2469	60.6547	1.74744	6.84474	-5.88671	724	34.6711	35.4034	38.3251	1	-0.732281
625	65.6882	68.5172	58.8897	2.07509	7.5524	-2.82898	725	31.5888	34.6888	37.6817	1	-3.10005
626	62.422	67.6122	57.56	2.40274	7.64952	-5.19021	726	34.9299	35.4574	36.5473	0	-0.527452
627	64.0213	64.5372	55.4102	2.8396	6.28739	-0.515818	727	34.1069	33.8566	35.1123	0	0.250271
628	63.6509	64.9306	55.3542	3.38567	6.19072	-1.2797	728	32.4734	32.6957	34.2895	1	-0.222333
629	61.6048	64.8955	53.3735	4.04097	7.48109	-3.29069	729	29.7028	33.7069	35.4029	1	-4.0041
630	59.7502	63.8902	52.3586	4.69626	6.83528	-4.13996	730	31.6959	32.0909	34.6803	1	-0.394916
631	60.5125	62.3688	50.7754	5.56998	6.02338	-1.85631	731	29.0935	33.0444	35.0763	1	-3.95094
632	59.1408	63.7903	50.5112	6.55292	6.72616	-4.6495	732	30.3521	33.2472	34.7651	1	-2.8951
633	59.8556	59.5266	46.4823	7.75429	5.29004	0.32895	733	29.8107	31.6733	33.6782	1	-1.86263
634	58.8592	60.0609	44.3571	9.06487	6.63887	-1.20162	734	28.8458	30.1347	32.2134	1	-1.28897
635	60.4279	61.7489	44.1964	10.7031	6.84938	-1.321	735	27.0629	25.5548	29.2511	1	1.50814
636	58.2958	62.8271	44.4259	12.4505	5.95071	-4.53135	736	27.0099	28.396	30.2578	1	-1.38615
637	58.9548	61.1122	41.8589	14.5256	4.72769	-2.15737	737	24.9555	25.5954	27.3865	1	-0.639887
638	60.9519	63.7665	40.4547	16.8192	6.49266	-2.81466	738	25.4331	26.4915	27.6189	0	-1.05844
639	61.0669	65.0897	39.753	19.5495	5.7871	-4.02277	739	21.8909	25.9362	27.6585	1	-4.04533
640	61.7502	65.0249	37.632	22.3891	5.00378	-3.2747	740	22.4234	25.9067	27.4327	1	-3.48331
641	59.8564	67.099	36.126	25.6656	5.30748	-7.2426	741	20.9858	24.4508	25.6446	0	-3.46498
642	64.077	69.6603	35.4408	29.2697	4.94989	-5.5833	742	20.8761	23.1935	24.7948	1	-2.31736
643	64.9198	70.8229	32.1734	33.3107	5.33883	-5.90304	743	18.4713	22.5402	23.7095	0	-4.06885
644	68.3616	72.9464	31.8954	37.6793	3.37176	-4.5848	744	20.3542	22.144	23.5672	1	-1.78974
645	70.5989	76.8889	30.5206	42.4847	3.88354	-6.28994	745	18.7003	21.0704	22.7655	1	-2.37019
646	71.1435	79.1813	28.6566	47.5087	3.01599	-8.03776	746	18.0852	20.3926	22.275	1	-2.30742
647	73.4459	85.0448	28.878	52.751	3.41583	-11.5989	747	18.1443	18.7878	19.6996	0	-0.643511
648	81.6743	87.5822	27.0732	58.1025	2.4064	-5.90781	748	18.1602	16.6805	18.9315	1	1.47972
649	84.8076	93.5373	26.5277	63.3449	3.6648	-8.72978	749	17.4165	16.1042	17.6292	1	1.31226
650	88.8045	96.2738	24.1103	68.478	3.68552	-7.46931	750	16.8831	17.1092	18.2501	0	-0.226086
651	90.4584	100.2	25.1228	73.3927	1.68491	-9.74202
652	94.3911	100.716	21.7507	78.3074	0.657874	-6.32487
653	98.5051	106.627	22.0499	82.8944	1.68311	-8.12234
654	108.038	110.032	19.751	87.263	3.01793	-1.99437
655	111.47	113.155	19.6319	91.304	2.21917	-1.68496
656	111.726	116.155	19.1071	95.1265	1.92096	-4.42875
657	120.713	119.717	18.0189	98.6214	3.07687	0.996185
658	123.05	121.233	16.5537	101.57	3.1086	1.8176
659	121.569	121.509	16.034	103.973	1.50234	0.0601657
660	127.298	124.08	15.7157	105.939	2.42503	3.21881
661	129.464	124.355	14.5047	107.468	2.38226	5.10936
662	132.734	124.757	13.3611	108.451	2.94498	7.97673
663	132.136	124.137	12.7966	109.106	2.2343	7.99905
664	131.933	123.426	11.8071	109.215	2.40348	8.5076
665	132.061	125.009	11.929	108.997	4.0833	7.05203
666	133.218	124.384	11.8048	108.451	4.12866	8.8333
667	128.494	120.313	10.7916	107.468	2.05315	8.18152
668	126.878	120.203	10.3268	106.157	3.7189	6.67536
669	123.19	118.232	9.24455	104.519	4.46842	4.95826
670	121.581	114.923	9.09933	102.553	3.27089	6.65757
671	117.368	111.518	8.81561	100.478	2.22479	5.84967
672	115.833	108.392	8.35974	98.1845	1.84759	7.44091
673	115.138	105.542	7.84128	95.7818	1.91934	9.59577
674	108.518	101.409	7.13845	93.1606	1.10982	7.10888
675	107.081	98.0104	7.05804	90.5395	0.412858	9.07098
676	102.165	95.3631	6.21357	87.6999	1.44967	6.80177
677	93.8302	91.0995	6.17383	85.0787	-0.153074	2.73077
678	90.8612	88.3322	6.23761	82.2391	-0.144561	2.52907
679	84.9731	83.8862	5.58908	79.5087	-1.21162	1.08693
680	83.4223	82.6389	5.86702	76.6691	0.10278	0.783399
681	82.4221	81.2124	6.02177	73.9388	1.25184	1.20979
682	76.9433	78.06	6.11775	71.0992	0.843048	-1.11668
683	73.7909	73.8501	4.96845	68.3688	0.512848	-0.0591318
684	67.0768	71.8585	4.72465	65.6384	1.49549	-4.78173
685	67.777	68.1829	4.67112	63.1264	0.385345	-0.405898
686	62.837	64.8891	4.5561	60.5053	-0.172282	-2.05204
687	64.8951	62.0048	4.61741	57.9933	-0.605929	2.89032
688	60.2863	61.2266	4.6424	55.5906	0.993587	-0.940259
689	57.206	57.0087	4.16769	53.2971	-0.456023	0.197248
690	56.5469	54.077	4.0651	51.0035	-0.991636	2.46994
691	53.5012	51.4932	4.0891	48.8192	-1.41511	2.00794
692	48.6716	49.6576	3.91256	46.6349	-0.8899	-0.985952
693	46.4229	49.3695	3.56676	44.6691	1.13367	-2.94655
694	46.9267	45.5211	3.83014	42.8124	-1.12142	1.40562
695	44.5665	44.0142	3.30974	41.065	-0.360437	0.552264
696	40.095	41.0802	3.2898	39.4267	-1.63633	-0.985189
697	40.8385	39.7981	3.39903	37.8977	-1.49864	1.04036
698	36.1062	39.334	3.18474	36.4779	-0.32864	-3.22783
699	33.9264	37.346	2.8306	35.0581	-0.542706	-3.4196
700	32.2663	35.3014	2.69	33.7475	-1.13612	-3.03511
701	32.4019	36.0707	2.77981	32.5462	0.744716	-3.66874
702	30.8288	33.0615	2.75188	31.454	-1.14438	-2.23267
703	28.4961	31.8488	2.87509	30.4711	-1.49737	-3.35272
704	27.9593	31.0183	3.03628	29.5973	-1.61533	-3.05904
705	24.1376	31.1929	2.62723	28.6144	-0.0487388	-7.05534
706	25.7762	29.2953	2.44847	27.7407	-0.893851	-3.51909
707	23.9437	27.649	2.51815	26.9762	-1.84533	-3.70524
708	22.41	27.2812	2.18023	26.3209	-1.2199	-4.87121
709	20.9747	26.0329	2.12489	25.6656	-1.7576	-5.05815
710	20.9696	25.1834	2.15777	25.1195	-2.09387	-4.21386
711	20.4805	24.7193	1.7707	24.6827	-1.73401	-4.23885
712	18.3347	24.304	1.96839	24.2458	-1.91016	-5.96928
713	17.6138	23.9177	1.78735	23.8089	-1.67863	-6.30384
714	19.2541	23.5035	1.46479	23.3721	-1.3334	-4.24934
715	18.0875	24.5932	1.87715	23.0444	-0.328382	-6.50574
716	16.7959	22.2093	1.37318	22.7168	-1.8807	-5.41336
717	16.3268	23.3524	1.85789	22.3891	-0.894591	-7.02559
718	15.4231	23.2221	1.6975	22.1707	-0.646136	-7.79896
719	15.3596	21.0123	1.01625	21.9523	-1.95617	-5.6527
720	14.2851	21.3151	1.47893	21.6246	-1.78842	-7.03008
721	15.5969	21.5871	1.75707	21.5154	-1.68535	-5.99019
722	14.1561	21.4515	1.32109	21.297	-1.16658	-7.29539
723	12.3122	20.4956	1.41952	21.0786	-2.00247	-8.18339
724	12.7476	19.8544	1.19053	20.8601	-2.1962	-7.10685
725	12.66	19.8166	1.0948	20.6417	-1.91994	-7.15659
726	11.2642	19.2551	1.0414	20.4233	-2.20954	-7.99092
727	12.9943	18.847	1.01019	20.0956	-2.25881	-5.85274
728	10.7522	19.2246	0.875149	19.9864	-1.63694	-8.47242
729	11.4595	18.8939	0.879956	19.6588	-1.64485	-7.43435
730	11.3115	18.046	1.11734	19.4403	-2.51165	-6.73454
731	10.189	17.4651	0.650021	19.1127	-2.29757	-7.2761
732	9.82329	17.7001	1.01055	18.785	-2.09546	-7.87683
733	9.37698	17.674	1.10144	18.5666	-1.99406	-8.297
734	9.62216	16.867	0.783191	18.239	-2.15512	-7.24486
735	9.87814	15.7901	0.785541	17.9113	-2.90678	-5.91194
736	8.12965	16.3683	0.648145	17.5837	-1.86351	-8.23866
737	8.8796	16.3012	0.69448	17.1468	-1.54007	-7.42161
738	8.52169	14.9506	0.575228	16.8192	-2.44374	-6.42896
739	7.48703	15.4488	0.54364	16.3823	-1.47709	-7.96182
740	6.98	14.2503	0.440755	15.9454	-2.13587	-7.27032
741	6.76528	14.1488	0.401288	15.6178	-1.87023	-7.38356
742	7.91447	13.7506	0.372964	15.2901	-1.91254	-5.8361
743	6.80861	13.4943	0.399944	14.8533	-1.75897	-6.68565
744	6.19815	13.3029	0.426274	14.5256	-1.649	-7.10476
745	5.62448	12.8242	0.412783	14.0888	-1.67738	-7.1997
746	6.20196	12.5378	0.385377	13.7611	-1.60871	-6.33583
747	5.70337	11.8963	0.452904	13.3243	-1.88086	-6.19294
748	4.54503	11.8872	0.497543	12.8874	-1.49779	-7.34213
749	4.88919	11.8106	0.600727	12.5598	-1.34984	-6.92145
750	4.91032	11.251	0.665492	12.1229	-1.53738	-6.34069

## Sheet: Fig1 - figure supp 2 panel B
wlD	obsD	fitD	donD	accD	bkD	resD	wlA	obsA	fitA	accA	bkA	resA
560	267.671	269.446	224.268	0	45.1779	-1.77515	660	616.237	618.915	607.132	6.27923	-2.67783
561	260.385	261.004	244.069	0	16.9351	-0.619787	661	613.155	620.123	607.086	6.94786	-6.96752
562	285.104	278.115	265.142	0	12.9733	6.98887	662	624.583	615.294	606.77	4.54318	9.28896
563	317.685	309.284	297.906	0	11.3782	8.40078	663	626.66	625.811	616.639	4.88783	0.849045
564	355.724	351.854	340.57	0	11.284	3.87035	664	606.404	624.703	616.109	4.57987	-18.299
565	391.369	386.667	376.472	0	10.1954	4.7023	665	624.61	626.269	617.292	4.78434	-1.65873
566	422.574	422.548	413.587	0	8.961	0.0263514	666	609.301	620.726	611.759	4.77876	-11.4245
567	452.63	454.033	445.397	0	8.6359	-1.40292	667	610.283	609.856	601.796	4.29532	0.426836
568	502.742	491.548	482.405	0	9.1434	11.1938	668	584.129	592.568	585.501	3.7659	-8.4387
569	527.548	523.33	514.954	0	8.37629	4.21744	669	574.674	574.963	566.011	4.77081	-0.288968
570	548.455	569.712	561.329	0	8.38324	-21.2573	670	567.625	567.382	561.481	3.14437	0.243848
571	597.401	596.404	587.738	0	8.66591	0.997695	671	545.066	542.292	535.419	3.66319	2.77388
572	626.683	616.619	609.078	0	7.54122	10.0639	672	528.995	528.064	522.094	3.18155	0.931242
573	660.117	647.799	639.479	0	8.31996	12.3178	673	509.281	507.236	502.261	2.65162	2.04508
574	666.189	664.594	656.208	0	8.38661	1.59461	674	474.697	479.522	473.044	3.45213	-4.8245
575	677.267	694.79	685.477	0	9.3131	-17.5232	675	464.019	458.902	452.718	3.29528	5.11744
576	697.589	695.801	687.558	0	8.24254	1.78823	676	427.94	438.526	434.191	2.31041	-10.5867
577	696.177	693.036	685.361	0	7.67467	3.14047	677	429.407	421.527	417.66	2.06065	7.88008
578	712.954	709.863	701.729	0	8.13403	3.09104	678	403.89	403.737	399.191	2.42308	0.152863
579	704.318	703.857	696.297	0	7.55969	0.461347	679	385.098	380.449	376.366	2.17568	4.64881
580	697.828	708.125	700.676	0	7.44907	-10.2974	680	364.62	368.139	364.323	2.03334	-3.51845
581	688.984	689.728	681.992	0	7.73614	-0.743284	681	345.639	346.283	342.309	2.11803	-0.643801
582	685.838	689.053	681.646	0	7.40746	-3.21539	682	331.519	327.77	322.7	2.70198	3.74849
583	682.775	672.898	666.018	0	6.87989	9.87726	683	317.758	321.236	316.76	2.38547	-3.47808
584	665.621	669.576	662.23	0	7.34605	-3.95508	684	307.224	293.747	290.607	1.67366	13.4763
585	644.284	644.328	637.069	0	7.25945	-0.0439443	685	285.94	275.209	271.88	1.77409	10.7302
586	638.266	632.987	626.315	0	6.6721	5.27885	686	263.938	263.631	259.53	2.18556	0.306968
587	616.128	601.531	594.43	0	7.10109	14.5972	687	259.806	244.891	240.768	2.19705	14.9154
588	594.87	592.466	584.682	0	7.78367	2.40447	688	246.707	247.07	244.173	1.54374	-0.362273
589	574.776	572.318	565.228	0	7.09003	2.45832	689	226.502	230.392	228.168	1.18531	-3.88994
590	545.807	549.469	542.09	0	7.37905	-3.66141	690	218.273	216.843	214.003	1.51378	1.43004
591	532.64	519.194	510.719	0	8.47513	13.4452	691	205.96	199.818	196.955	1.52569	6.14202
592	506.399	505.664	498.239	0	7.42564	0.734587	692	195.509	194.867	191.262	1.92123	0.64224
593	486.471	491.777	483.989	0	7.78882	-5.30635	693	187.684	180.187	176.2	2.12493	7.49623
594	454.13	470.208	462.791	0	7.417	-16.0778	694	183.422	173.366	171.269	1.11715	10.0568
595	453.31	439.362	430.535	0	8.82719	13.9481	695	162.262	167.11	164.287	1.5045	-4.84751
596	425.105	426.864	418.848	0	8.01601	-1.75929	696	166.97	152.991	150.055	1.56456	13.9792
597	395.653	401.802	393.287	0	8.51485	-6.14894	697	152.412	144.388	142.909	0.787933	8.02474
598	380.528	385.028	376.599	0.0670421	8.36152	-4.49975	698	142.111	139.484	136.3	1.69668	2.62763
599	369.201	367.322	358.672	0.0670421	8.58328	1.87846	699	134.107	132.867	130.046	1.50339	1.2406
600	347.66	352.74	343.884	0.0670421	8.78883	-5.08001	700	127.997	125.941	123.636	1.22846	2.05562
601	327.112	333.758	325.146	0.0670421	8.54494	-6.64523	701	122.363	120.056	118.208	0.984652	2.30762
602	314.931	324.081	315.346	0.0670421	8.66811	-9.14986	702	117.142	114.629	111.187	1.83443	2.51255
603	295.367	302.756	293.621	0.0670421	9.06796	-7.38906	703	112.057	105.098	102.979	1.12886	6.95969
604	286.925	292.41	282.746	0.0670421	9.59724	-5.48512	704	105.232	105.521	103.704	0.968683	-0.28939
605	270.282	273.142	263.84	0.0670421	9.23434	-2.85989	705	102.526	95.3736	94.2054	0.622575	7.15284
606	260.205	267.084	257.786	0.0670421	9.23082	-6.87883	706	102.165	101.677	100.326	0.720001	0.488709
607	239.543	249.897	239.367	0.134084	10.3955	-10.3537	707	93.898	87.089	85.8763	0.6463	6.80899
608	243.484	236.212	226.605	0.134084	9.47342	7.27201	708	94.2928	89.6323	87.1519	1.32195	4.66041
609	228.503	227.795	217.59	0.134084	10.0719	0.70774	709	85.189	85.6494	83.6822	1.04839	-0.460373
610	223.491	219.107	208.684	0.134084	10.2892	4.38393	710	79.0319	82.2524	81.2454	0.536669	-3.22048
611	210.695	216.271	206.332	0.201126	9.73839	-5.57586	711	82.3447	81.6259	80.1286	0.797952	0.718818
612	199.774	200.464	190.113	0.201126	10.1497	-0.689281	712	79.8102	74.2133	73.3647	0.452233	5.59689
613	195.426	197.717	188.125	0.268168	9.32379	-2.2914	713	71.9387	78.6281	77.9167	0.379126	-6.6894
614	186.253	189.89	179.555	0.268168	10.0666	-3.63751	714	69.52	75.6216	73.3845	1.19224	-6.10164
615	185.216	185.664	176.75	0.33521	8.57923	-0.448609	715	72.7715	68.1899	67.2732	0.488571	4.58153
616	177.573	177.782	169.037	0.402252	8.34285	-0.20929	716	64.5043	66.1596	65.4713	0.366864	-1.65529
617	175.213	173.605	164.527	0.469294	8.6084	1.60814	717	68.7968	65.6199	64.6747	0.503742	3.17686
618	170.231	168.569	158.894	0.536336	9.13919	1.6611	718	68.3592	63.9173	62.8671	0.55969	4.44192
619	162.678	163.462	153.217	0.670421	9.57462	-0.784178	719	63.6231	57.443	56.5751	0.462535	6.18013
620	159.531	161.962	152.724	0.737463	8.50065	-2.43146	720	61.645	62.2163	60.3103	1.01576	-0.571284
621	159.005	154.969	145.277	0.938589	8.75284	4.03605	721	59.4708	56.6786	55.9808	0.371859	2.79226
622	152.955	150.467	140.707	1.07267	8.68773	2.48786	722	60.9849	58.8286	57.5844	0.663096	2.1563
623	149.702	147.587	137.888	1.2738	8.42522	2.1145	723	56.9899	56.382	54.93	0.77382	0.607869
624	148.686	144.137	135.099	1.47493	7.5639	4.54888	724	58.6996	60.9895	59.0504	1.03338	-2.28988
625	141.268	143.83	134.004	1.74309	8.08218	-2.56214	725	58.1213	56.2495	54.2632	1.05856	1.87175
626	142.845	139.539	129.541	2.0783	7.91953	3.3061	726	56.6304	51.4771	50.7537	0.385505	5.15336
627	135.634	136.27	125.572	2.48056	8.21709	-0.63613	727	56.398	53.7697	52.9364	0.444121	2.62826
628	136.245	133.494	123.61	2.88281	7.00155	2.7507	728	51.791	51.0831	50.0253	0.563726	0.707861
629	130.704	132.971	122.24	3.41914	7.31244	-2.26728	729	49.5378	53.6562	52.5307	0.599856	-4.11844
630	125.304	128.939	117.947	4.02252	6.96954	-3.63537	730	50.889	50.9757	49.2572	0.915863	-0.0867158
631	127.629	123.368	111.652	4.75999	6.95611	4.26089	731	53.5727	49.3569	48.0084	0.71866	4.21581
632	124.634	124.276	112.372	5.56449	6.34007	0.357665	732	45.2703	49.7093	48.702	0.536856	-4.43898
633	120.542	119.755	106.61	6.57012	6.57482	0.786873	733	47.2477	45.4639	44.1333	0.709098	1.78385
634	123.462	118.58	104.257	7.64279	6.68084	4.88128	734	47.4192	43.393	42.0134	0.735213	4.02622
635	111.799	116.72	101.931	8.91659	5.87159	-4.92111	735	44.889	42.0956	39.6425	1.30736	2.79347
636	116.285	117.338	100.973	10.3245	6.04075	-1.05274	736	44.1626	42.7803	41.5447	0.658508	1.38228
637	110.904	115.369	97.8083	12.0005	5.56023	-4.46519	737	45.8954	43.0307	41.842	0.633516	2.86472
638	110.531	115.737	96.3902	13.7436	5.60338	-5.20593	738	39.9437	40.1616	39.4134	0.398756	-0.217897
639	110.226	113.041	92.2098	15.7549	5.07671	-2.81561	739	42.7335	39.7079	38.5649	0.609143	3.02557
640	106.275	109.931	87.3171	17.9673	4.64651	-3.65616	740	38.0791	40.7721	39.7593	0.539748	-2.693
641	104.192	106.362	82.7731	20.4478	3.141	-2.17025	741	39.2009	39.3963	38.6041	0.422221	-0.19541
642	103.679	106.538	81.1643	23.1295	2.2445	-2.8592	742	39.4581	35.9227	34.86	0.566372	3.53539
643	103.075	107.569	78.2437	26.0794	3.24545	-4.49333	743	31.8734	34.2175	33.4415	0.413561	-2.34409
644	103.035	107.168	74.6967	29.1633	3.30805	-4.13338	744	34.5872	34.2949	33.3504	0.503383	0.292211
645	100.666	105.106	70.6422	32.3813	2.08284	-4.44006	745	33.7283	32.1715	31.0465	0.599508	1.55681
646	99.0694	104.377	67.4422	35.6664	1.26802	-5.30717	746	27.8402	32.8102	31.561	0.665759	-4.97001
647	101.482	108.284	66.3125	38.8844	3.08687	-6.80128	747	32.0535	28.4971	27.892	0.322473	3.55638
648	100.836	107.584	64.6029	42.0354	0.945548	-6.74732	748	27.8433	29.4249	27.931	0.796162	-1.58161
649	102.515	105.168	59.3008	45.0523	0.814749	-2.65238	749	26.8442	26.9792	25.9671	0.539369	-0.134981
650	101.218	104.715	55.5717	48.0692	1.07436	-3.49685	750	25.3175	26.9441	26.1869	0.403519	-1.62662
651	103.771	107.756	54.6938	50.8849	2.17724	-3.98519
652	100.523	104.968	51.8326	53.5666	-0.431468	-4.44512
653	103.48	105.93	48.932	56.0472	0.95126	-2.45014
654	103.126	105.938	46.9022	58.3936	0.641846	-2.81203
655	105.963	108.034	44.7464	60.539	2.74855	-2.07072
656	103.275	108.162	43.0487	62.3491	2.76414	-4.88702
657	106.13	107.531	41.6077	63.824	2.0994	-1.40153
658	106.999	102.966	37.6976	65.0308	0.238036	4.03259
659	108.546	103.21	34.479	65.9694	2.7612	5.33672
660	106.151	103.509	34.9665	66.5728	1.96956	2.64234
661	107.104	99.9276	32.3373	66.975	0.615356	7.17638
662	105.434	100.486	30.8798	67.0421	2.56442	4.94747
663	103.18	98.7289	30.2412	66.908	1.57975	4.45153
664	101.978	96.5511	29.1728	66.5728	0.805486	5.4269
665	102.719	96.967	27.2385	65.9694	3.75917	5.75226
666	100.431	94.6477	27.1849	65.1649	2.29794	5.78336
667	97.459	91.9394	25.0982	64.1592	2.68199	5.51956
668	95.7264	85.6812	22.1171	62.9525	0.611603	10.0453
669	86.152	83.2343	21.138	61.6787	0.417551	2.91776
670	89.9993	83.7633	20.8761	60.2708	2.61638	6.23602
671	83.587	80.0721	19.6401	58.7959	1.63611	3.51495
672	77.9518	76.116	17.9415	57.1869	0.987575	1.83588
673	79.2368	75.9374	18.7026	55.5779	1.65689	3.29947
674	75.0947	69.1431	15.4193	53.8348	-0.111005	5.95163
675	71.5246	67.9822	15.5193	52.2258	0.237119	3.5424
676	69.7802	66.556	16.0641	50.4827	0.0092468	3.22412
677	64.1392	63.2345	13.6299	48.8066	0.797989	0.904742
678	62.6257	59.6165	12.6292	47.0635	-0.0762489	3.0092
679	58.4799	57.9741	12.9717	45.3875	-0.385129	0.505814
680	55.8875	56.7657	13.9762	43.6444	-0.854881	-0.878202
681	54.2062	53.7414	12.5997	41.9683	-0.826623	0.464787
682	49.896	53.0795	12.2349	40.2923	0.55237	-3.18355
683	49.9966	50.3145	11.7868	38.7503	-0.222658	-0.317848
684	48.5878	48.3401	11.1257	37.1413	0.0731278	0.24765
685	43.7053	45.8341	10.8914	35.5993	-0.656641	-2.12881
686	43.4704	45.8768	11.5667	34.1244	0.185648	-2.40637
687	42.1773	42.3452	10.3715	32.7165	-0.742844	-0.167942
688	40.0369	41.3703	10.2705	31.3086	-0.208793	-1.33348
689	38.1792	39.1954	9.51075	29.9678	-0.283111	-1.01627
690	35.2791	37.7127	9.59325	28.627	-0.507552	-2.43352
691	36.0874	36.0496	9.17436	27.4202	-0.545007	0.0378365
692	35.1066	34.6688	8.13536	26.2805	0.252953	0.437761
693	31.5986	31.7862	7.16971	25.2078	-0.591365	-0.187589
694	30.5139	33.5996	8.72929	24.2022	0.668178	-3.08578
695	28.6149	31.4344	7.99231	23.2636	0.178455	-2.81946
696	26.4086	30.1331	8.07155	22.392	-0.330474	-3.72457
697	27.6693	28.4086	7.75376	21.5205	-0.865705	-0.7393
698	25.9936	27.0379	6.82741	20.716	-0.505539	-1.04426
699	25.3063	27.0739	6.96221	19.9785	0.133183	-1.76763
700	22.8162	25.9312	7.33964	19.3081	-0.716601	-3.11491
701	21.558	24.3822	6.96448	18.7047	-1.28705	-2.82414
702	22.359	24.0238	5.94824	18.1684	-0.0928234	-1.66484
703	18.6795	23.3929	6.42221	17.565	-0.594301	-4.71343
704	19.5133	22.2484	5.91462	17.0287	-0.694853	-2.73514
705	19.5104	22.4178	6.40667	16.5594	-0.548228	-2.90746
706	17.9793	21.1092	5.20968	16.1571	-0.257634	-3.12984
707	16.7845	21.6036	5.96397	15.7549	-0.115284	-4.81911
708	16.7531	20.0565	5.73364	15.4197	-1.09683	-3.30338
709	15.5698	20.028	5.40672	15.1515	-0.530218	-4.45822
710	15.9129	19.017	4.84718	14.8833	-0.713491	-3.1041
711	15.3888	18.4389	4.56082	14.6152	-0.737053	-3.05012
712	14.6965	17.9234	4.49814	14.347	-0.921697	-3.22691
713	13.678	18.2322	4.75388	14.1459	-0.667515	-4.55422
714	14.6412	17.379	4.0237	13.9447	-0.589478	-2.73777
715	13.5823	17.2528	4.48101	13.7436	-0.971853	-3.67043
716	13.0423	16.7261	3.78543	13.6095	-0.668881	-3.6838
717	12.6682	16.2655	3.72368	13.4755	-0.933656	-3.59728
718	11.8301	15.8447	3.55518	13.2743	-0.984809	-4.01461
719	13.3418	16.092	3.31772	13.2073	-0.432969	-2.75025
720	11.9227	15.2824	3.28615	13.0732	-1.07699	-3.35967
721	12.7964	16.4599	3.88258	12.9391	-0.36176	-3.66356
722	12.1889	14.3857	2.63128	12.805	-1.05065	-2.19681
723	10.1101	14.6951	3.01906	12.6709	-0.994944	-4.58498
724	9.912	14.1089	2.84217	12.5369	-1.27018	-4.19686
725	10.6656	14.2686	2.69355	12.3357	-0.760654	-3.60305
726	10.6546	13.8583	2.57216	12.2687	-0.982588	-3.20367
727	8.68799	12.8507	2.30928	12.0676	-1.5262	-4.16266
728	9.26161	13.5367	2.4054	11.9335	-0.802217	-4.27506
729	9.25492	12.846	2.30714	11.7324	-1.19354	-3.59104
730	8.85172	12.4793	2.18775	11.5312	-1.2397	-3.62756
731	9.36507	12.1947	1.69511	11.3971	-0.897543	-2.82965
732	8.10999	12.7849	1.93823	11.196	-0.349375	-4.67488
733	7.66544	12.8389	2.57018	10.9949	-0.726217	-5.17342
734	8.0569	11.8415	1.79716	10.7938	-0.749391	-3.78464
735	6.917	11.2594	1.63841	10.5256	-0.904577	-4.34244
736	7.53024	10.9855	1.43409	10.3245	-0.773045	-3.45528
737	7.47259	11.0632	1.85027	10.0563	-0.843367	-3.59062
738	6.55784	9.91369	1.0575	9.78814	-0.931956	-3.35585
739	6.76981	9.76229	1.04069	9.58701	-0.865411	-2.99248
740	6.87113	9.95387	1.29063	9.38589	-0.722642	-3.08275
741	6.0299	9.0624	1.07608	9.11772	-1.13139	-3.0325
742	6.50995	9.28479	0.951816	8.91659	-0.583621	-2.77484
743	5.65248	9.27892	1.19777	8.64842	-0.567273	-3.62644
744	5.67478	9.084	1.03615	8.4473	-0.399445	-3.40922
745	5.64621	8.00616	1.25444	8.17913	-1.42742	-2.35995
746	5.58058	8.62098	1.39304	7.91096	-0.683018	-3.0404
747	5.32708	8.36081	0.87716	7.70984	-0.226186	-3.03373
748	4.53609	7.56183	0.808031	7.44167	-0.687873	-3.02574
749	4.61995	7.89051	1.24021	7.24054	-0.590246	-3.27056
750	4.29196	7.25868	1.10184	6.97237	-0.815541	-2.96672

## Sheet: Fig1 - figure supp 2 panel C
wlD	obsD	fitD	donD	accD	bkD	resD	wlA	obsA	fitA	accA	bkA	resA
560	296.592	294.755	254.063	0	40.6917	1.83717	660	660.981	672.785	662.778	6.27923	-11.8041
561	299.273	287.994	271.783	0	16.2106	11.2793	661	675.787	666.069	654.997	6.94786	9.71799
562	320.467	314.408	300.676	0	13.7317	6.05943	662	678.566	668.834	661.593	4.54318	9.73251
563	363.103	346.968	335.212	0	11.7559	16.1344	663	679.327	675.19	667.4	4.88783	4.13762
564	393.399	395.679	384.467	0	11.2126	-2.28009	664	676.71	671.794	664.495	4.57987	4.91598
565	437.26	427.577	416.864	0	10.7131	9.68321	665	666.085	669.67	662.045	4.78434	-3.58473
566	490.662	477.151	468.197	0	8.95436	13.511	666	672.526	659.128	651.513	4.77876	13.3975
567	517.994	517.041	508.417	0	8.62366	0.952755	667	649.257	661.347	654.502	4.29532	-12.0901
568	564.642	561.034	552.176	0	8.85773	3.60767	668	650.319	642.132	636.13	3.7659	8.18733
569	614.042	595.553	586.788	0	8.76443	18.4894	669	618.429	628.512	620.909	4.77081	-10.0824
570	646.634	632.438	622.955	0	9.48373	14.1959	670	615.563	596.444	591.433	3.14437	19.1185
571	682.192	670.86	661.766	0	9.09408	11.3313	671	587.401	579.734	573.896	3.66319	7.66651
572	703.294	706.242	696.927	0	9.31505	-2.94831	672	568.667	579.773	574.703	3.18155	-11.1058
573	743.487	729.64	720.474	0	9.16558	13.8476	673	536.732	542.919	538.694	2.65162	-6.18717
574	775.482	768.764	760.438	0	8.32612	6.71795	674	517.469	517.765	512.264	3.45213	-0.295833
575	797.697	782.093	774.44	0	7.6523	15.6039	675	502.296	506.653	501.401	3.29528	-4.35687
576	805.395	808.802	801.045	0	7.7569	-3.40696	676	490.254	477.701	474.019	2.31041	12.5531
577	825.137	820.042	812.206	0	7.83572	5.09515	677	452.9	452.942	449.658	2.06065	-0.0422428
578	825.052	822.846	815.13	0	7.71536	2.20617	678	432.86	433.366	429.504	2.42308	-0.506114
579	826.498	834.588	827.083	0	7.50465	-8.08984	679	418.749	417.861	414.393	2.17568	0.88832
580	830.352	813.692	806.728	0	6.9637	16.6594	680	397.658	390.178	386.938	2.03334	7.48027
581	832.4	823.924	817.013	0	6.91042	8.4761	681	366.387	383.677	380.302	2.11803	-17.2902
582	814.655	821.922	815.185	0	6.73764	-7.26725	682	353.798	346.267	341.961	2.70198	7.53073
583	809.506	808.028	802.152	0	5.87686	1.47801	683	339.346	343.087	339.285	2.38547	-3.74113
584	775.153	782.528	776.005	0	6.5232	-7.37541	684	317.914	324.272	321.605	1.67366	-6.35837
585	754.863	762.375	755.178	0	7.19631	-7.51129	685	298.453	310.201	307.374	1.77409	-11.7485
586	748.516	744.862	738.674	0	6.18811	3.65403	686	280.771	289.444	285.961	2.18556	-8.67232
587	719.845	738.253	731.231	0	7.02199	-18.4081	687	275.992	279.761	276.259	2.19705	-3.76828
588	699.035	720.357	712.984	0	7.37252	-21.3221	688	257.663	272.125	269.665	1.54374	-14.4617
589	676.485	692.058	685.599	0	6.45871	-15.5729	689	245.962	251.162	249.273	1.18531	-5.2006
590	650.588	656.464	649.151	0	7.31308	-5.87625	690	232.4	241.205	238.793	1.51378	-8.80525
591	613.018	626.112	618.451	0	7.66122	-13.0939	691	224.655	218.508	216.076	1.52569	6.14736
592	588.554	604.085	596.534	0	7.55151	-15.5311	692	207.64	208.698	205.636	1.92123	-1.05773
593	579.295	582.929	574.782	0	8.14662	-3.63324	693	195.177	197.322	193.936	2.12493	-2.14498
594	546.245	548.525	539.917	0	8.60823	-2.28016	694	183.194	188.181	186.4	1.11715	-4.98655
595	521.279	538.829	529.941	0	8.88724	-17.55	695	178.38	175.187	172.789	1.5045	3.19285
596	501.662	503.068	494.902	0	8.16652	-1.40617	696	166.496	168.627	166.134	1.56456	-2.13167
597	479.662	478.513	469.921	0	8.59205	1.14812	697	157.414	158.681	157.425	0.787933	-1.2667
598	457.443	451.093	442.122	0	8.97066	6.35035	698	151.822	142.45	139.746	1.69668	9.37203
599	440.577	440.907	431.003	0	9.90401	-0.330025	699	141.066	138.121	135.725	1.50339	2.94533
600	414.245	415.225	405.999	0.023711	9.20285	-0.979736	700	135.358	137.846	135.888	1.22846	-2.48758
601	392.198	392.42	383.025	0.023711	9.37162	-0.222148	701	131.509	132.918	131.348	0.984652	-1.40856
602	374.101	371.388	362.376	0.023711	8.98862	2.71264	702	123.658	126.723	123.8	1.83443	-3.06554
603	369.345	358.746	348.158	0.023711	10.5642	10.5991	703	114.367	118.546	116.747	1.12886	-4.17872
604	344.797	339.746	328.943	0.023711	10.7784	5.05188	704	107.918	112.635	111.092	0.968683	-4.71753
605	329.186	320.22	308.976	0.023711	11.2207	8.96579	705	110.049	103.306	102.313	0.622575	6.74367
606	302.628	308.362	297.527	0.023711	10.8113	-5.73449	706	102.624	98.4036	97.2561	0.720001	4.22079
607	294.916	295.051	284.055	0.023711	10.9722	-0.13505	707	96.8085	96.2215	95.1915	0.6463	0.586966
608	274.638	279.469	269.328	0.023711	10.1176	-4.83064	708	92.408	92.9759	90.8692	1.32195	-0.56788
609	265.743	268.357	257.123	0.047422	11.186	-2.614	709	86.9888	90.7673	89.0965	1.04839	-3.77846
610	255.542	259.708	247.148	0.047422	12.5122	-4.16551	710	87.3934	83.3483	82.4931	0.536669	4.04506
611	241.776	247.419	235.406	0.047422	11.9654	-5.64322	711	85.8174	82.1715	80.8998	0.797952	3.6459
612	234.713	238.47	226.752	0.047422	11.67	-3.75648	712	80.5983	82.0796	81.3589	0.452233	-1.48131
613	226.704	233.562	221.713	0.071133	11.7783	-6.85778	713	79.1758	80.5269	79.9227	0.379126	-1.35115
614	214.256	224.038	211.962	0.071133	12.0054	-9.78239	714	74.513	78.8315	76.9314	1.19224	-4.31842
615	210.334	213.094	200.969	0.0948439	12.0309	-2.76021	715	76.2718	71.4719	70.6933	0.488571	4.79984
616	203.091	209.636	198.175	0.0948439	11.3656	-6.545	716	74.7626	70.5825	69.9979	0.366864	4.18009
617	197.853	205.555	192.287	0.118555	13.15	-7.70219	717	70.4567	70.0472	69.2444	0.503742	0.409476
618	193.305	202.518	190.406	0.142266	11.9696	-9.21296	718	74.8356	70.4277	69.5358	0.55969	4.40787
619	187.062	185.67	173.886	0.165977	11.6177	1.39151	719	66.0823	68.8289	68.0918	0.462535	-2.74665
620	185.909	182.305	171.313	0.189688	10.8019	3.60397	720	65.192	64.7662	63.1474	1.01576	0.425807
621	176.431	185.598	172.874	0.23711	12.4868	-9.16726	721	63.5089	66.0701	65.4775	0.371859	-2.56119
622	178.576	177.356	164.923	0.260821	12.1724	1.22028	722	63.2585	63.7874	62.7306	0.663096	-0.528858
623	171.771	173.707	162.519	0.331954	10.8561	-1.93589	723	61.7166	58.6688	57.4356	0.77382	3.04785
624	173.437	168.182	156.313	0.379376	11.4887	5.25563	724	59.9606	56.8378	55.191	1.03338	3.12275
625	163.792	166.523	154.392	0.450509	11.6801	-2.7309	725	58.4124	60.3561	58.6691	1.05856	-1.94369
626	161.888	160.382	148.793	0.521642	11.0667	1.50643	726	58.5948	56.4219	55.8075	0.385505	2.17293
627	162.117	161.16	150.149	0.616486	10.3943	0.956549	727	56.8257	60.7109	60.0031	0.444121	-3.88521
628	154.99	153.736	142.132	0.735041	10.8688	1.25434	728	55.2105	58.3386	57.4402	0.563726	-3.12804
629	156.622	151.906	141.242	0.877307	9.78676	4.71603	729	55.6933	56.0899	55.134	0.599856	-0.396645
630	147.073	152.561	141.202	1.01957	10.3396	-5.48734	730	52.2404	52.4974	51.0379	0.915863	-0.257078
631	146.692	144.784	134.138	1.20926	9.4367	1.90885	731	51.466	54.3696	53.2243	0.71866	-2.9036
632	140.692	143.516	131.807	1.42266	10.2858	-2.82363	732	53.3637	51.9631	51.1075	0.536856	1.40061
633	140.573	138.606	126.649	1.68348	10.2731	1.96703	733	48.4779	49.1992	48.0691	0.709098	-0.721298
634	136.216	136.563	125.463	1.96801	9.13146	-0.346593	734	49.529	50.9357	49.7641	0.735213	-1.4067
635	130.643	136.13	123.198	2.32368	10.6084	-5.48763	735	47.5288	49.234	47.1505	1.30736	-1.70522
636	128.71	128.176	116.725	2.70305	8.74788	0.533727	736	47.1659	42.8476	41.7982	0.658508	4.31831
637	126.245	124.104	112.743	3.15356	8.20731	2.14089	737	40.3063	44.6017	43.5921	0.633516	-4.29539
638	124.516	120.424	109.114	3.65149	7.65862	4.09192	738	42.3884	43.4343	42.7988	0.398756	-1.04591
639	118.108	119.722	106.824	4.24427	8.65406	-1.61385	739	42.599	43.8279	42.8572	0.609143	-1.22896
640	113.241	112.314	100.44	4.86075	7.01313	0.926647	740	38.5065	42.5672	41.707	0.539748	-4.06074
641	110.138	111.974	97.6332	5.57208	8.76903	-1.83623	741	39.2337	39.1609	38.4881	0.422221	0.0728013
642	108.802	112.93	98.3288	6.35454	8.24684	-4.12771	742	41.8217	39.6129	38.7103	0.566372	2.20883
643	101.711	102.328	88.6795	7.23185	6.41696	-0.617293	743	39.3077	35.8857	35.2267	0.413561	3.42196
644	100.84	102.438	88.1309	8.18029	6.1271	-1.59822	744	36.5573	37.5319	36.7296	0.503383	-0.974575
645	98.5249	100.4	85.0714	9.22357	6.10495	-1.87501	745	35.0237	34.2599	33.3045	0.599508	0.763835
646	96.3495	95.7796	79.3304	10.3143	6.13492	0.569968	746	34.8002	33.5105	32.4495	0.665759	1.28969
647	96.4712	93.0116	76.9126	11.4524	4.64656	3.45963	747	31.9025	29.5223	29.0083	0.322473	2.38025
648	89.4718	91.7766	74.5039	12.6142	4.65852	-2.30479	748	29.3271	29.8994	28.6306	0.796162	-0.572376
649	90.4648	88.7247	70.4025	13.7524	4.56983	1.74004	749	31.3475	28.7062	27.8467	0.539369	2.64129
650	84.7096	83.7514	64.6675	14.8668	4.2171	0.958257	750	28.199	28.8292	28.1862	0.403519	-0.630245
651	84.2425	87.8773	67.1551	15.9338	4.78844	-3.63486
652	82.3801	81.3836	60.6615	17.0008	3.72136	0.996516
653	80.5759	81.054	58.2226	17.9966	4.83481	-0.478081
654	76.1985	76.8426	54.4747	18.9451	3.42287	-0.644116
655	74.8131	74.7274	51.312	19.8224	3.59301	0.0857227
656	69.5648	74.7775	49.9796	20.6523	4.1457	-5.2127
657	71.5986	68.0924	44.549	21.411	2.13229	3.50625
658	69.7577	69.3648	44.2752	22.0512	3.03837	0.392941
659	69.5923	66.1483	41.3668	22.5729	2.20865	3.44399
660	68.2935	67.5041	41.1374	22.9997	3.36701	0.789468
661	64.1429	68.0872	41.0114	23.3316	3.74419	-3.9443
662	62.1919	61.779	35.6802	23.545	2.55375	0.412927
663	62.3322	62.6568	35.1177	23.6873	3.85181	-0.324577
664	59.4337	59.887	34.0841	23.711	2.09192	-0.453311
665	58.002	57.5559	31.8471	23.6636	2.04524	0.446055
666	55.0382	56.9468	30.2046	23.545	3.19722	-1.90861
667	55.7366	53.4537	27.7579	23.3316	2.36426	2.28287
668	52.6368	50.5692	26.9256	23.0471	0.596514	2.06763
669	49.9202	47.9595	24.6058	22.6914	0.662313	1.96065
670	46.6888	48.0978	25.5841	22.2646	0.249014	-1.40901
671	48.4587	45.2168	23.1863	21.8141	0.216425	3.24183
672	43.4133	45.8128	22.6525	21.3162	1.84413	-2.39949
673	42.0822	40.9609	19.9292	20.7945	0.237245	1.12126
674	39.888	41.9331	20.1029	20.2255	1.60472	-2.0451
675	39.6046	36.0481	18.2404	19.6564	-1.8487	3.55643
676	38.5124	38.4132	18.8452	19.0399	0.528091	0.0991531
677	36.596	34.3136	16.5986	18.4709	-0.755895	2.28237
678	34.7735	32.0466	16.589	17.8544	-2.39678	2.7269
679	32.0903	32.6073	16.0073	17.2616	-0.661533	-0.516996
680	32.2063	31.2848	15.1246	16.6451	-0.484827	0.921502
681	29.6736	30.9597	16.0755	16.0523	-1.16807	-1.28614
682	27.4876	29.1669	13.9085	15.4359	-0.177474	-1.67925
683	26.7762	26.7141	12.6164	14.8431	-0.745391	0.0621525
684	26.3552	26.2407	12.7654	14.2503	-0.775035	0.114544
685	25.1616	25.8929	13.088	13.705	-0.900008	-0.731358
686	26.1571	23.3558	12.1379	13.1359	-1.91798	2.80131
687	23.3107	24.4784	11.9658	12.5905	-0.0779306	-1.1677
688	23.0525	23.5189	11.8232	12.0689	-0.373269	-0.466313
689	21.3899	21.1444	10.1409	11.571	-0.567434	0.245468
690	21.0615	22.0074	11.1014	11.073	-0.16705	-0.9459
691	19.1306	21.2657	11.2743	10.5988	-0.607336	-2.13519
692	18.8736	21.6153	11.7041	10.1246	-0.213419	-2.74166
693	19.284	18.4068	9.45993	9.69779	-0.750973	0.877215
694	19.4348	19.3858	10.2526	9.29471	-0.161485	0.0489382
695	15.5025	16.7509	9.21362	8.91533	-1.37801	-1.24846
696	16.3452	16.6758	9.53546	8.55967	-1.41934	-0.330591
697	16.903	17.4722	8.7437	8.22771	0.500767	-0.569148
698	15.2029	15.7443	8.51973	7.91947	-0.694863	-0.541422
699	15.1051	14.1389	8.64447	7.61123	-2.11676	0.96615
700	13.7221	15.8522	8.91869	7.32669	-0.393144	-2.13016
701	15.0277	14.1392	8.30132	7.06587	-1.228	0.88848
702	13.2973	14.8063	8.67426	6.82876	-0.696709	-1.50907
703	12.9921	14.2978	8.13105	6.61537	-0.448642	-1.30566
704	12.5172	12.104	7.1896	6.42568	-1.51124	0.413197
705	11.3566	12.5642	7.54335	6.21228	-1.19141	-1.20757
706	11.9402	10.9116	6.10427	6.02259	-1.21528	1.02861
707	11.3865	11.3635	6.25472	5.85661	-0.747861	0.023072
708	10.0528	10.2788	6.00795	5.71435	-1.44351	-0.225975
709	10.5821	10.4212	5.94986	5.57208	-1.10074	0.160941
710	9.61152	10.1549	5.8664	5.45353	-1.16499	-0.543417
711	8.82915	10.9593	6.0648	5.35868	-0.464219	-2.13011
712	9.92607	8.86303	5.25126	5.26384	-1.65207	1.06304
713	8.50409	9.58937	5.58471	5.169	-1.16434	-1.08528
714	8.38089	7.93061	4.29843	5.07415	-1.44197	0.450274
715	9.04005	9.64321	5.07989	5.00302	-0.439696	-0.603153
716	9.34446	7.64914	4.32196	4.93189	-1.60471	1.69533
717	8.55915	8.17957	4.4359	4.86075	-1.11708	0.379573
718	6.90393	7.82107	3.56444	4.81333	-0.556701	-0.917142
719	7.30199	7.43748	3.79462	4.76591	-1.12305	-0.135491
720	6.93447	7.20089	4.09172	4.69478	-1.58561	-0.266422
721	7.28362	8.04174	4.10864	4.67106	-0.737971	-0.758116
722	6.75597	5.72337	2.39437	4.62364	-1.29465	1.0326
723	6.73155	6.36012	3.19106	4.57622	-1.40715	0.371425
724	5.64718	6.61625	2.90729	4.5288	-0.819843	-0.969063
725	6.69529	6.53348	2.9348	4.48138	-0.882696	0.161805
726	5.98892	7.51143	3.74495	4.43395	-0.667472	-1.52252
727	4.82735	6.15424	3.32737	4.36282	-1.53595	-1.3269
728	5.85666	5.23593	2.74725	4.33911	-1.85043	0.620728
729	5.05236	4.79463	1.82459	4.26798	-1.29793	0.25773
730	5.55925	5.00801	2.6566	4.22056	-1.86914	0.551235
731	4.95575	5.6642	2.78678	4.14942	-1.272	-0.708455
732	5.25703	5.38248	2.53981	4.07829	-1.23562	-0.125451
733	4.86696	4.04627	1.67252	4.03087	-1.65712	0.820695
734	4.3029	4.85277	1.69407	3.95973	-0.801035	-0.549867
735	4.84418	4.91224	2.49105	3.8886	-1.46741	-0.0680654
736	4.36068	3.54944	1.68514	3.81747	-1.95317	0.811241
737	4.53478	4.69861	2.14012	3.72262	-1.16413	-0.163829
738	4.21782	3.73339	1.4195	3.65149	-1.3376	0.484433
739	3.7157	3.40048	1.50267	3.55665	-1.65884	0.315216
740	3.4652	4.18036	1.9337	3.4618	-1.21514	-0.715162
741	3.48486	3.5975	1.54215	3.39067	-1.33532	-0.112645
742	2.52928	3.01434	1.31843	3.31954	-1.62363	-0.485061
743	3.16478	3.21857	1.51039	3.22469	-1.51652	-0.0537957
744	3.41477	3.16197	0.994893	3.15356	-0.986486	0.252801
745	2.98368	2.74126	1.2136	3.05872	-1.53106	0.242419
746	2.84938	2.9069	1.1386	2.98758	-1.21928	-0.0575202
747	2.99978	2.82206	1.35076	2.89274	-1.42144	0.177714
748	3.00585	2.93432	1.03473	2.7979	-0.898304	0.0715342
749	2.56182	2.9742	1.39428	2.72676	-1.14684	-0.412379
750	2.23194	2.35394	1.29236	2.63192	-1.57034	-0.122001
