# Supplementary material for: Real-time monitoring of peptidoglycan synthesis by membrane-reconstituted penicillin-binding proteins
Source: eLife. 2021 Feb 24;10:e61525. doi: 10.7554/eLife.61525 (PMC7943195; doi:10.7554/eLife.61525)
Supplement: Figure 1—figure supplement 4—source data 1. [file elife-61525-fig1-figsupp4-data1.xlsx]

## Sheet: Figure 1-figure supplement 4A
	PBP1B					PBP1B + Ampicillin					PBP1B + Moenomycin					PBP1B (only labelled lipid II)
	Atto550/Atto647n		Atto550		Atto647n	Atto550/Atto647n		Atto550		Atto647n	Atto550/Atto647n		Atto550		Atto647n	Atto550/Atto647n		Atto550		Atto647n
time (min)	FI680nm	FI590nm	FI680nm	FI590nm	FI680nm	FI680nm	FI590nm	FI680nm	FI590nm	FI680nm	FI680nm	FI590nm	FI680nm	FI590nm	FI680nm	FI680nm	FI590nm	FI680nm	FI590nm	FI680nm
0	1	1	1	1	1	1	1	1	1	1	1	1	1	1	1	1	1	1	1	1
0.33	0.983698	0.995272	1.00312	1.01275	1.02439	0.995936	1.00049	1.00637	0.999163	0.997975	1.013	0.998212	1.00726	1.01167	0.984969	0.992047	0.995055	0.96987	1.0139	0.993379
0.67	0.999782	1.00007	1.00393	1.00891	1.02333	1.00781	1.00841	1.01425	1.00537	1.00555	1.0034	0.99943	0.998486	1.01127	0.982	1.00105	0.992994	1.00138	1.00974	0.994684
1	0.993911	0.99564	0.990449	1.00268	0.998947	1.01318	1.0054	1.01516	1.00893	1.02742	1.00492	0.993015	1.00151	1.00844	0.985804	1.00314	0.994364	1.02126	1.0191	0.992176
1.33	0.998669	0.993074	0.971035	0.990973	1.01643	1.01204	1.00404	1.01957	1.01174	1.0177	1.00633	0.987611	1.00867	1.02072	0.987382	1.00954	0.992485	0.991013	1.03413	1.00481
1.67	1.0053	0.977986	0.970677	0.971809	1.01661	1.00948	0.993696	1.01715	1.00215	1.01099	0.998399	0.983646	1.00454	1.0145	0.989794	0.996324	0.99379	1.02886	1.0447	1.00211
2	1.02791	0.982013	0.96434	0.974471	1.01058	1.02569	1.00204	1.02432	1.01143	1.03274	0.986031	0.995192	1.0047	1.02439	0.969382	0.997687	0.997991	1.02546	1.05234	1.00903
2.33	1.04026	0.979055	0.967464	0.973406	1.02187	1.03153	1.00115	1.0325	1.01044	1.04171	0.991706	0.99978	1.02517	1.03029	0.998423	0.990621	0.995342	1.01965	1.04321	1.01755
2.67	1.04057	0.969729	0.957824	0.96481	1.01538	1.02072	0.999494	1.01682	1.00499	1.04564	0.986855	0.996216	1.02151	1.02958	0.995546	1.01071	1.003	1.03099	1.05854	1.01364
3	1.0553	0.956126	0.928234	0.951445	1.00737	1.01576	0.995455	0.999335	0.993136	1.04188	0.986128	0.996423	1.0201	1.03209	0.995361	1.01131	0.999426	1.01515	1.04062	1.02107
3.33	1.03913	0.939041	0.932741	0.944343	1.00222	1.02877	0.992563	0.985795	0.984502	1.04361	0.990348	0.993171	1.0165	1.02868	0.985804	1.01122	0.999335	1.01377	1.06024	1.01093
3.67	1.04262	0.920781	0.955414	0.961151	0.996082	1.02594	0.985353	0.993824	0.980269	1.05108	0.981835	0.988052	1.01149	1.02671	0.989887	1.00307	0.999335	1.0015	1.04245	1.0328
4	1.07291	0.917288	0.969294	0.97301	0.982164	1.03517	0.979235	0.994252	0.985626	1.06016	0.974414	0.981352	1.02261	1.02883	0.993227	1.002	0.99349	1.02397	1.04654	1.01354
4.33	1.08435	0.906406	0.982772	0.97831	1.00327	1.03746	0.977156	1.00941	0.992729	1.05628	0.983193	0.982221	1.01117	1.03169	0.984969	0.990621	0.992916	1.02811	1.07133	1.0327
4.67	1.08049	0.883964	0.990583	0.987054	1.01234	1.04931	0.977089	1.01392	1.00271	1.03216	0.98882	0.992937	0.999165	1.02269	0.972258	0.983523	0.98895	1.02264	1.05735	1.02127
5	1.09458	0.877703	0.998126	0.987688	1.01211	1.06141	0.980634	1.01815	1.00947	1.04188	0.999709	0.999171	0.995875	1.01947	0.970681	0.986407	0.982935	1.02869	1.06422	1.05126
5.33	1.11752	0.868187	1.01129	0.993204	1.00807	1.08579	0.991244	1.03957	1.01858	1.03372	1.01271	1.01155	0.999373	1.01954	0.997495	0.978454	0.978487	1.00778	1.05563	1.03922
5.67	1.14757	0.864337	1.00808	0.995628	1.02193	1.10545	1.00187	1.03767	1.02577	1.0343	1.0276	1.0262	1.01634	1.03055	0.96465	0.963245	0.978995	1.01965	1.06431	1.07162
6	1.25617	0.876265	1.00518	0.985208	1.06023	1.13109	0.997814	1.03368	1.01944	1.04795	1.04133	1.02073	1.04459	1.02422	0.96697	0.977567	0.98381	1.04482	1.08135	1.07674
6.33	1.27085	0.874139	1.01495	0.997712	1.0838	1.16104	1.0177	1.04052	1.03949	1.05466	1.05823	1.04514	1.04303	1.043	0.969289	0.987041	0.988845	1.04568	1.08305	1.10663
6.67	1.29698	0.868721	1.00781	0.998913	1.08216	1.18782	1.02279	1.04898	1.04383	1.03997	1.06982	1.05025	1.03117	1.05343	0.97365	1.00954	0.995042	1.02875	1.0576	1.23814
7	1.31788	0.863173	1.0083	0.994461	1.07123	1.20375	1.02372	1.05117	1.04725	1.05703	1.06708	1.05191	1.03916	1.06155	0.962052	1.02237	1.005	1.01751	1.0524	1.28789
7.33	1.37323	0.858278	1.02133	0.995889	1.10702	1.20962	1.02203	1.06119	1.04945	1.04766	1.07227	1.05356	1.07049	1.06991	0.973557	1.04103	1.01447	1.00766	1.05899	1.33123
7.67	1.41666	0.85488	1.01924	0.989082	1.09556	1.22146	1.01834	1.05958	1.04786	1.06178	1.0769	1.05326	1.06679	1.08134	0.992299	1.0481	1.02078	1.03255	1.06415	1.29241
8	1.45323	0.850734	1.01165	0.984041	1.08573	1.22903	1.01566	1.05269	1.05062	1.06727	1.07496	1.05465	1.07483	1.08621	0.985155	1.04971	1.02813	1.03353	1.06823	1.17384
8.33	1.50113	0.845222	1.0108	0.97976	1.13012	1.2324	1.0121	1.07003	1.04904	1.05553	1.07358	1.05631	1.0743	1.09101	0.980423	1.06229	1.03045	1.03082	1.07214	1.17404
8.67	1.53332	0.839626	1.0021	0.975332	1.12123	1.25634	1.00932	1.06556	1.05125	1.05964	1.06897	1.05561	1.09791	1.09641	0.999536	1.07551	1.03491	1.02944	1.06373	1.24897
9	1.54397	0.821746	0.992145	0.957244	1.11889	1.24531	0.997841	1.05497	1.03848	1.0682	1.06747	1.04745	1.09117	1.09303	1.01011	1.07037	1.03598	1.03923	1.07171	1.28007
9.33	1.57937	0.821152	1.01138	0.96908	1.10292	1.26405	1.00325	1.06485	1.05201	1.09041	1.07909	1.05654	1.10548	1.1103	1.0412	1.07715	1.04337	1.05064	1.07163	1.24636
9.67	1.60916	0.813442	1.00705	0.966678	1.13789	1.27952	1.00111	1.07302	1.05573	1.08729	1.08151	1.0583	1.0919	1.11155	1.05326	1.07874	1.04347	1.05963	1.07415	1.23393
10	1.64214	0.8056	1.00678	0.961763	1.11637	1.28327	1.00035	1.06385	1.05662	1.09267	1.07455	1.05992	1.10125	1.11324	1.04435	1.08286	1.04401	1.05075	1.0763	1.24295
10.33	1.64524	0.786271	0.991966	0.948058	1.12351	1.28629	0.989271	1.06504	1.04421	1.10071	1.07171	1.04994	1.10391	1.09976	1.05307	1.07899	1.0444	1.07121	1.08557	1.22048
10.67	1.67714	0.783515	0.984424	0.950391	1.1214	1.2945	0.988111	1.04651	1.04954	1.10157	1.07496	1.06062	1.11597	1.11086	1.04574	1.09018	1.04561	1.06804	1.10758	1.23784
11	1.69964	0.778656	0.996117	0.956247	1.12497	1.30593	0.991603	1.06532	1.06026	1.09648	1.07618	1.06612	1.11305	1.11591	1.04027	1.07313	1.0402	1.07558	1.09701	1.22169
11.33	1.73635	0.774783	0.98786	0.959837	1.12386	1.33112	0.994042	1.07915	1.06371	1.1187	1.08808	1.07595	1.10809	1.12444	1.05391	1.08527	1.04509	1.08947	1.11156	1.20393
11.67	1.72993	0.762855	0.991386	0.951671	1.12123	1.3342	0.985712	1.07929	1.05839	1.10956	1.08743	1.06525	1.11237	1.11854	1.06792	1.08093	1.04664	1.09373	1.11413	1.20524
12	1.75791	0.754301	1.00009	0.949055	1.11339	1.34039	0.98234	1.07635	1.05885	1.10707	1.08527	1.07034	1.11576	1.11842	1.0591	1.08045	1.0474	1.08538	1.12469	1.20233
12.33	1.77843	0.747196	0.975989	0.947673	1.14661	1.34901	0.982274	1.07136	1.06004	1.11557	1.09325	1.07024	1.11216	1.11978	1.04685	1.08786	1.04718	1.10992	1.12852	1.26322
12.67	1.79708	0.739462	0.995448	0.946371	1.12158	1.35361	0.978315	1.07193	1.05823	1.09735	1.08711	1.06885	1.12093	1.11897	1.06708	1.08501	1.04841	1.10577	1.13043	1.34818
13	1.79706	0.731882	0.995894	0.946246	1.11415	1.361	0.978035	1.07264	1.06004	1.1165	1.08915	1.06781	1.10767	1.11977	1.04639	1.09331	1.04509	1.10289	1.13268	1.3217
13.33	1.83128	0.724861	0.996697	0.942791	1.12825	1.37246	0.976703	1.07131	1.06123	1.11083	1.0957	1.06941	1.10981	1.12072	1.06931	1.09385	1.04689	1.09379	1.11711	1.20604
13.67	1.83931	0.718172	0.990717	0.943743	1.1114	1.3713	0.973144	1.08062	1.05918	1.11736	1.08542	1.06777	1.11315	1.12015	1.07042	1.08273	1.04839	1.09062	1.12052	1.28097
14	1.85566	0.71045	0.988173	0.942463	1.12491	1.38076	0.973251	1.07848	1.06009	1.10342	1.09051	1.06981	1.10266	1.12052	1.05576	1.08641	1.04762	1.09246	1.12085	1.30725
14.33	1.87543	0.706232	0.991565	0.94158	1.11754	1.39773	0.969999	1.08076	1.05986	1.11256	1.09078	1.07401	1.11289	1.11974	1.05613	1.08967	1.04899	1.10658	1.13553	1.32852
14.67	1.89629	0.699354	0.98371	0.941319	1.12462	1.4028	0.966907	1.07863	1.06139	1.11615	1.09633	1.07129	1.10819	1.11948	1.08137	1.08736	1.05024	1.11361	1.12342	1.37356
15	1.90474	0.692071	0.988217	0.940549	1.12643	1.40899	0.964388	1.07288	1.0601	1.10909	1.08479	1.07122	1.10945	1.12197	1.0501	1.09008	1.05134	1.1041	1.12033	1.37607
15.33	1.91498	0.687806	0.994689	0.938578	1.12	1.41115	0.963814	1.08266	1.05808	1.10736	1.09347	1.07033	1.09994	1.12173	1.03906	1.07934	1.04899	1.10433	1.11829	1.37607
15.67	1.94158	0.685572	0.996296	0.938023	1.1286	1.43088	0.965854	1.08357	1.06309	1.12361	1.09876	1.07725	1.11717	1.13015	1.05066	1.08622	1.05024	1.095	1.1217	1.39131
16	1.95109	0.680321	0.996608	0.940051	1.13696	1.42551	0.962682	1.08618	1.06461	1.12766	1.0941	1.07856	1.12297	1.12933	1.05771	1.09049	1.05048	1.10531	1.13386	1.37526
16.33	1.95939	0.674904	0.992413	0.939473	1.12754	1.44349	0.960136	1.08694	1.06358	1.12205	1.09859	1.07824	1.1283	1.1296	1.05363	1.08593	1.04978	1.1105	1.12853	1.41759
16.67	1.9701	0.666053	0.993796	0.936539	1.14345	1.44096	0.953739	1.06414	1.05951	1.11204	1.08954	1.07317	1.11169	1.12001	1.07126	1.07798	1.04676	1.09287	1.11969	1.38389
17	1.9725	0.661752	0.983888	0.932972	1.13023	1.44549	0.954485	1.07568	1.06068	1.10747	1.09017	1.07196	1.12428	1.1239	1.07218	1.09236	1.05087	1.09823	1.12164	1.38118
17.33	1.99195	0.655669	0.991743	0.932213	1.12632	1.45426	0.951446	1.07635	1.06098	1.11546	1.08408	1.07305	1.10934	1.12612	1.06495	1.08302	1.05268	1.10278	1.12063	1.36814
17.67	1.99991	0.651012	0.984111	0.932383	1.13181	1.47261	0.95118	1.07682	1.06095	1.12055	1.08816	1.07167	1.12104	1.12557	1.05391	1.08622	1.0444	1.09823	1.11426	1.33925
18	2.00399	0.649159	0.981523	0.929755	1.14199	1.46532	0.950007	1.08613	1.06094	1.13506	1.09121	1.07274	1.11947	1.12433	1.04945	1.09087	1.05273	1.09857	1.12269	1.36142
18.33	2.01427	0.643551	0.986879	0.929449	1.12637	1.47606	0.949274	1.08048	1.06008	1.11603	1.09318	1.077	1.10882	1.1263	1.06569	1.09442	1.05267	1.08981	1.12662	1.32942
18.67	2.02693	0.639512	0.983844	0.929041	1.15327	1.48537	0.945968	1.07592	1.06138	1.12593	1.09546	1.07883	1.11498	1.12754	1.04277	1.09689	1.05196	1.09869	1.12631	1.31748
19	2.03197	0.634047	0.995894	0.9286	1.14152	1.48529	0.944809	1.07611	1.06214	1.13235	1.10198	1.07976	1.10845	1.12643	1.07868	1.10076	1.05616	1.10571	1.12589	1.33664
19.33	2.04424	0.629722	0.975899	0.927796	1.13129	1.48465	0.943996	1.08157	1.06255	1.10747	1.0982	1.07954	1.11785	1.1269	1.06485	1.09943	1.05519	1.11873	1.12859	1.29873
19.67	2.0488	0.625529	0.989378	0.924726	1.14889	1.49421	0.94073	1.07264	1.06297	1.12708	1.09456	1.07823	1.12292	1.12525	1.06717	1.09376	1.05598	1.09154	1.13207	1.27104
20	2.07955	0.6256	0.982996	0.930672	1.14749	1.50032	0.943023	1.08637	1.06786	1.12963	1.10324	1.08614	1.12918	1.13599	1.04732	1.09632	1.05549	1.10589	1.13037	1.25519
20.33	2.07651	0.618163	0.984424	0.927377	1.12228	1.49404	0.94065	1.08243	1.06289	1.11488	1.10249	1.07694	1.10308	1.12862	1.06458	1.09163	1.05635	1.10571	1.12917	1.24646
20.67	2.09031	0.615216	0.986254	0.926991	1.15076	1.5102	0.937372	1.0935	1.06318	1.11731	1.09298	1.07939	1.1118	1.1285	1.06996	1.1006	1.05683	1.1075	1.12822	1.2568
21	2.08821	0.613339	0.992368	0.927694	1.13988	1.51552	0.935599	1.09478	1.06458	1.1165	1.10152	1.0794	1.1107	1.12777	1.0591	1.09851	1.05469	1.11603	1.1302	1.2248
21.33	2.09615	0.607209	0.987012	0.925292	1.13363	1.5069	0.933307	1.08399	1.06318	1.12969	1.09902	1.08016	1.11582	1.12791	1.06959	1.09198	1.05639	1.11954	1.12789	1.18979
21.67	2.10458	0.605593	0.999331	0.924987	1.1369	1.52924	0.93284	1.07388	1.06309	1.1187	1.08901	1.08247	1.11994	1.12712	1.04964	1.10067	1.05765	1.10093	1.12999	1.14475
22	2.11121	0.602267	0.98786	0.926448	1.15158	1.51936	0.931747	1.09492	1.06356	1.13478	1.1022	1.08142	1.13007	1.13019	1.06662	1.10155	1.0567	1.10174	1.12987	1.14264
22.33	2.10266	0.598382	0.988262	0.927263	1.15971	1.5432	0.931387	1.0925	1.06496	1.12598	1.09987	1.07922	1.12955	1.1315	1.06829	1.10504	1.06167	1.10623	1.13314	1.13281
22.67	2.12215	0.595566	0.975141	0.926176	1.14193	1.52843	0.928802	1.0849	1.06474	1.11835	1.10108	1.08244	1.12443	1.1319	1.06049	1.10095	1.05987	1.10479	1.13098	1.13261
23	2.13181	0.593368	0.985986	0.925927	1.14211	1.54995	0.928642	1.08342	1.06776	1.13512	1.10099	1.08327	1.11592	1.13525	1.06189	1.10985	1.06318	1.10306	1.13123	1.13682
23.33	2.13238	0.590683	0.982951	0.926618	1.15439	1.55165	0.926536	1.08323	1.06578	1.10892	1.10479	1.08036	1.11472	1.13292	1.06124	1.11071	1.06265	1.11021	1.13284	1.13823
23.67	2.14829	0.587737	0.987905	0.927671	1.16316	1.54971	0.927589	1.08	1.0658	1.11933	1.09766	1.08428	1.10882	1.13206	1.0591	1.09965	1.0623	1.12115	1.13139	1.15679
24	2.15093	0.586596	0.998215	0.927399	1.16415	1.55111	0.92587	1.0962	1.06917	1.11355	1.09888	1.08483	1.11827	1.13367	1.05752	1.11204	1.06121	1.13498	1.1338	1.14726
24.33	2.15741	0.584494	0.97581	0.926493	1.13942	1.55685	0.924484	1.083	1.06831	1.12893	1.10322	1.08443	1.13357	1.13473	1.05799	1.10995	1.06175	1.1181	1.13368	1.14896
24.67	2.16352	0.581666	0.985361	0.925157	1.15041	1.55931	0.92407	1.08737	1.06699	1.13576	1.1014	1.08629	1.11289	1.13422	1.06096	1.09129	1.06112	1.10825	1.13338	1.13071
25	2.16245	0.579753	0.985227	0.926493	1.14906	1.57013	0.923711	1.09573	1.06771	1.12003	1.10368	1.08825	1.13132	1.1325	1.0669	1.09946	1.06382	1.1196	1.13658	1.13983
25.33	2.1786	0.574407	0.99576	0.927275	1.16199	1.56555	0.920232	1.09231	1.06658	1.11424	1.10215	1.085	1.10965	1.1324	1.07432	1.09617	1.06172	1.11234	1.13529	1.14545
25.67	2.18421	0.571473	0.977328	0.92536	1.18023	1.5687	0.919699	1.09478	1.06943	1.12355	1.09764	1.08463	1.12605	1.13155	1.05966	1.0967	1.06288	1.11464	1.13743	1.162
26	2.18487	0.571306	0.98371	0.924828	1.13953	1.57917	0.919432	1.0848	1.06461	1.12205	1.10732	1.08712	1.13738	1.13098	1.06411	1.09642	1.06254	1.10209	1.13816	1.26101
26.33	2.18729	0.569025	0.994466	0.923503	1.13883	1.57872	0.91746	1.07155	1.06517	1.12726	1.09851	1.08406	1.13185	1.13374	1.06216	1.09747	1.06421	1.098	1.13711	1.26472
26.67	2.19067	0.567172	0.994064	0.923571	1.14865	1.59072	0.918006	1.08575	1.06742	1.13264	1.10826	1.08475	1.12746	1.13351	1.06049	1.10114	1.06201	1.12213	1.13995	1.24055
27	2.20556	0.564475	0.989244	0.922099	1.15573	1.58826	0.918086	1.07848	1.06784	1.1235	1.10382	1.08641	1.12276	1.13462	1.07228	1.10621	1.06348	1.11511	1.13997	1.20975
27.33	2.19144	0.562194	0.975632	0.922903	1.17871	1.60028	0.915381	1.07682	1.06949	1.12685	1.11006	1.08988	1.13059	1.13447	1.06216	1.10177	1.0621	1.11897	1.13969	1.2258
27.67	2.19951	0.560293	0.979648	0.92245	1.17842	1.59188	0.919179	1.0829	1.06974	1.13032	1.11733	1.09491	1.11284	1.13675	1.06365	1.10593	1.06671	1.12536	1.14095	1.24215
28	2.22779	0.558654	0.978265	0.925961	1.14094	1.58998	0.915834	1.09288	1.06729	1.12124	1.10176	1.08558	1.12015	1.13342	1.0656	1.09297	1.06604	1.11424	1.13985	1.21326
28.33	2.23174	0.556622	0.994109	0.925304	1.14877	1.60291	0.916034	1.08057	1.06953	1.13188	1.10739	1.08734	1.10955	1.13441	1.08285	1.11182	1.06522	1.123	1.14173	1.25028
28.67	2.23131	0.554341	0.981523	0.924987	1.14643	1.59372	0.912009	1.09487	1.07076	1.1213	1.09764	1.08511	1.1271	1.13458	1.08044	1.09249	1.0654	1.12945	1.14434	1.24616
29	2.22681	0.55092	0.985406	0.926878	1.16807	1.61358	0.913181	1.08475	1.07065	1.13235	1.10501	1.08809	1.12772	1.13646	1.06569	1.10932	1.06753	1.12692	1.14192	1.24626
29.33	2.22934	0.548947	0.985718	0.924205	1.18579	1.61106	0.911422	1.08965	1.06823	1.1287	1.10657	1.08917	1.13561	1.13811	1.06495	1.1033	1.06684	1.13095	1.14696	1.20704
29.67	2.23458	0.547201	0.990761	0.92655	1.1714	1.60471	0.912075	1.08599	1.07346	1.11997	1.1135	1.0904	1.12683	1.14131	1.07051	1.10304	1.06492	1.12162	1.14161	1.18367
30	2.22952	0.545027	0.988976	0.925995	1.15725	1.61624	0.910542	1.07525	1.07161	1.11846	1.10678	1.08948	1.12824	1.13929	1.08554	1.09471	1.06978	1.11332	1.14607	1.16471
30.33	2.24176	0.544065	0.993618	0.924466	1.17187	1.62089	0.907637	1.09962	1.07138	1.12292	1.10564	1.08861	1.12501	1.14106	1.07506	1.09068	1.06971	1.11493	1.14449	1.16381
30.67	2.24449	0.542663	0.99094	0.927093	1.16333	1.62727	0.908237	1.08784	1.07244	1.1364	1.11639	1.08909	1.12892	1.13758	1.08091	1.10304	1.06737	1.12427	1.14435	1.17063
31	2.24231	0.540999	1.00353	0.926935	1.1614	1.62289	0.907051	1.09829	1.07254	1.13958	1.10591	1.08921	1.11764	1.13748		1.10165	1.06913	1.11706	1.14367	1.15829
31.33	2.23342	0.532517	0.977283	0.920014	1.17953	1.61432	0.899707	1.07706	1.05923	1.11349	1.09834	1.08174	1.11462	1.12638		1.09392	1.06624	1.12766	1.14306	1.17424
31.67	2.25058	0.538314	0.994957	0.923809	1.19275	1.62158	0.90833	1.09155	1.07304	1.13292	1.11045	1.09278	1.12804	1.13787		1.09655	1.06963	1.11574	1.14575	1.15438
32	2.26147	0.536996	0.991609	0.927478	1.15731	1.63991	0.907037	1.09145	1.07199	1.12558	1.09844	1.09067	1.13571	1.13461		1.10193	1.06228	1.12824	1.14054	1.20734
32.33	2.25267	0.53519	0.992948	0.923956	1.16058	1.63198	0.906451	1.09834	1.07531	1.13385	1.1137	1.09218	1.11796	1.13847		1.10653	1.07088	1.12501	1.14622	1.15638
32.67	2.28227	0.536473	1.00174	0.925496	1.16462	1.6506	0.90913	1.10694	1.0789	1.12905	1.11806	1.10104	1.16025	1.14746		1.10174	1.06887	1.12726	1.14629	1.17284
33	2.28015	0.532232	0.986879	0.922506	1.15743	1.63853	0.904665	1.08594	1.07218	1.14149	1.10892	1.09437	1.13811	1.14123		1.10174	1.06818	1.12738	1.14912	1.18216
33.33	2.27801	0.530545	0.992948	0.92245	1.20287	1.64846	0.905291	1.09829	1.07359	1.14241	1.10734	1.09466	1.12704	1.13982		1.107	1.0699	1.12041	1.14751	1.16531
33.67	2.29388	0.534822	1.01183	0.929551	1.19	1.64937	0.906584	1.09905	1.08	1.15097	1.12107	1.10351	1.14088	1.14941		1.10653	1.07182	1.12035	1.14738	1.1612
34	2.28122	0.528145	0.988887	0.923288	1.19012	1.66193	0.904771	1.08395	1.07384	1.14079	1.11568	1.09455	1.13571	1.14147		1.11134	1.06644	1.11413	1.13803	1.18467
34.33	2.29737	0.527468	0.990583	0.922099	1.16211	1.65959	0.902786	1.10784	1.07409	1.14345	1.11583	1.09543	1.13519	1.14311		1.10219	1.07087	1.12115	1.14942	1.18397
34.67	2.28587	0.525674	0.989824	0.923945	1.17234	1.66543	0.903265	1.09825	1.07281	1.12471	1.10412	1.09246	1.13174	1.14134		1.11857	1.07115	1.109	1.14796	1.17574
35	2.2822	0.525044	0.981166	0.923888	1.15953	1.66129	0.903332	1.08784	1.07595	1.13321	1.10768	1.09617	1.13174	1.14004		1.11578	1.07136	1.14426	1.14957	1.17304
35.33	2.28921	0.521064	1.00058	0.924896	1.1776	1.66136	0.902812	1.09687	1.07818	1.12488	1.11818	1.09648	1.13467	1.14071		1.10006	1.0735	1.14034	1.15193	1.18116
35.67	2.31622	0.5211	0.992859	0.92228	1.18901	1.66227	0.901546	1.09544	1.07433	1.14594	1.11166	1.09507	1.12245	1.14002		1.11401	1.0713	1.13262	1.14927	1.17996
36	2.30361	0.521385	0.991297	0.920241	1.21877	1.66853	0.90032	1.09473	1.07619	1.14363	1.11799	1.09317	1.13649	1.1417		1.10295	1.06646	1.12513	1.14341	1.16601
36.33	2.31131	0.51946	0.994064	0.922076	1.16456	1.66915	0.900413	1.1068	1.07452	1.13096	1.11117	1.09545	1.13331	1.14175		1.11999	1.07346	1.13129	1.15027	1.18407
36.67	2.32209	0.51864	0.997858	0.925802	1.16047	1.6773	0.900533	1.09649	1.07949	1.12598	1.10773	1.09608	1.13728	1.14407		1.10938	1.07417	1.13285	1.15173	1.14003
37	2.32415	0.517749	0.994912	0.927297	1.17602	1.66917	0.899334	1.08865	1.07768	1.13339	1.10979	1.09728	1.14668	1.14411		1.10707	1.07362	1.13538	1.15391	1.17394
37.33	2.32057	0.515112	1	0.926493	1.15556	1.67213	0.898814	1.08884	1.07589	1.1372	1.11166	1.09818	1.13289	1.14513		1.11058	1.0767	1.13452	1.15491	1.16912
37.67	2.3291	0.514482	0.994466	0.922461	1.20667	1.67897	0.897947	1.09592	1.07683	1.12436	1.11353	1.09876	1.13681	1.14404		1.11008	1.07556	1.12404	1.15387	1.18267
38	2.31679	0.511655	1.00411	0.925315	1.21404	1.67693	0.895295	1.09193	1.07684	1.12662	1.11137	1.09713	1.13268	1.14429		1.118	1.07616	1.1408	1.15512	1.17635
38.33	2.31701	0.511619	0.98853	0.92254	1.19696	1.67907	0.895868	1.09725	1.07944	1.12928	1.11721	1.09877	1.15138	1.14522		1.10048	1.07569	1.13579	1.15688	1.17494
38.67	2.34099	0.514316	1.0017	0.925881	1.17924	1.69097	0.896895	1.11169	1.08489	1.14339	1.1217	1.10603	1.14652	1.15678		1.1186	1.07688	1.13959	1.15586	1.15949
39	2.32528	0.509861	0.984558	0.924964	1.17257	1.67008	0.896321	1.10095	1.07931	1.14519	1.11316	1.09996	1.1449	1.14821		1.11568	1.07596	1.13527	1.15369	1.18267
39.33	2.3301	0.508827	0.991877	0.923016	1.17497	1.69922	0.894935	1.11055	1.08249	1.13616	1.11561	1.10038	1.1461	1.1492		1.10678	1.07576	1.1476	1.15652	1.17314
39.67	2.31797	0.507247	0.988574	0.924522	1.18936	1.69555	0.893882	1.10794	1.0789	1.14501	1.12277	1.10033	1.12475	1.14823		1.12177	1.07837	1.13135	1.15595	1.17264
40	2.3325	0.507176	0.991699	0.930786	1.22456	1.69164	0.895322	1.11046	1.07957	1.14154	1.11454	1.09832	1.15138	1.14888		1.10162	1.07589	1.13072	1.15606	1.16421
40.33	2.33549	0.506594	0.994332	0.926878	1.1948	1.69395	0.894202	1.11017	1.08032	1.13587	1.12005	1.10038	1.13206	1.15091		1.10399	1.07675	1.14339	1.15682	1.19189
40.67	2.33272	0.505204	0.997992	0.929755	1.22579	1.69405	0.894509	1.09753	1.08038	1.12824	1.12359	1.10161	1.14584	1.15075		1.11477	1.07419	1.13648	1.15722	1.17906
41	2.34045	0.5048	0.991699	0.930106	1.17193	1.6974	0.893869	1.09354	1.08119	1.1464	1.11971	1.10336	1.14427	1.15113		1.12117	1.07935	1.14748	1.15911	1.16321
41.33	2.34082	0.502566	0.999464	0.929007	1.16064	1.70723	0.894402	1.09796	1.08083	1.14611	1.11561	1.10373	1.14657	1.15219		1.10938	1.07725	1.13965	1.16177	1.17464
41.67	2.33043	0.50177	1.00085	0.924103	1.17374	1.71213	0.891897	1.11202	1.0794	1.14039	1.12747	1.10258	1.15132	1.15294		1.12842	1.0786	1.13884	1.15738	1.17344
42	2.35374	0.506154	0.990181	0.925904	1.20099	1.70568	0.895975	1.10609	1.08701	1.14282	1.13336	1.11195	1.16464	1.15766		1.1142	1.07953	1.12484	1.1587	1.18768
42.33	2.37371	0.503528	0.996742	0.928554	1.22146	1.72437	0.895269	1.11107	1.08601	1.15068	1.12696	1.11295	1.1461	1.16285		1.11736	1.08042	1.13302	1.16023	1.18076
42.67	2.35116	0.499418	0.998483	0.925372	1.21322	1.70769	0.893509	1.10124	1.08165	1.13998	1.11343	1.10342	1.15383	1.14983		1.12655	1.08206	1.13377	1.15907	1.16712
43	2.36201	0.49899	0.985673	0.92493	1.23637	1.70614	0.894029	1.09316	1.08116	1.14762	1.12948	1.10436	1.1389	1.14979		1.13527	1.08107	1.14339	1.15971	1.17855
43.33	2.35867	0.498871	0.999018	0.928883	1.22754	1.71306	0.892936	1.10495	1.0816	1.1412	1.12558	1.10556	1.14125	1.15399		1.13226	1.07568	1.1495	1.15549	1.17484
43.67	2.36971	0.500154	1.01924	0.934263	1.21351	1.71718	0.895935	1.11478	1.0872	1.15057	1.12555	1.11095	1.16339	1.16411		1.1251	1.08078	1.14454	1.15902	1.19089
44	2.3602	0.496234	1.00237	0.929132	1.1762	1.71393	0.89203	1.09801	1.08226	1.13616	1.12524	1.10184	1.14459	1.15197		1.12259	1.08153	1.14679	1.16296	1.16411
44.33	2.36838	0.495379	1.00509	0.935044	1.17135	1.72703	0.89059	1.10618	1.08182	1.14363	1.12349	1.10637	1.1484	1.15445		1.11774	1.08081	1.13285	1.16228	1.16852
44.67	2.35695	0.495687	1.00625	0.93347	1.19626	1.72541	0.893056	1.10884	1.08272	1.13929	1.12813	1.10529	1.15049	1.15658		1.11157	1.08047	1.14385	1.16074	1.17795
45	2.38591	0.497826	1.00643	0.940538	1.2038	1.72762	0.893989	1.11321	1.08925	1.14299	1.13324	1.11352	1.14944	1.16168		1.12554	1.0818	1.14103	1.16502	1.1941
45.33	2.34765	0.494155	1.00607	0.932926	1.20135	1.72927	0.890417	1.09696	1.08474	1.15091	1.12488	1.10559	1.14313	1.15367		1.11752	1.0813	1.15134	1.1612	1.16973
45.67	2.40149	0.497232	1.01312	0.937321	1.19532	1.73848	0.893349	1.1105	1.09075	1.1346	1.13167	1.11244	1.14657	1.16365		1.12744	1.08292	1.14368	1.16259	1.19149
46	2.38429	0.491981	1.0062	0.928588	1.18918	1.73634	0.889684	1.10191	1.08534	1.14137	1.12645	1.1056	1.15258	1.15694		1.10928	1.08239	1.12801	1.16199	1.18186
46.33	2.37844	0.490911	0.999777	0.927207	1.20965	1.72765	0.889418	1.11487	1.08424	1.14224	1.12269	1.10687	1.14918	1.15612		1.12304	1.08035	1.12306	1.16314	1.18216
46.67	2.38191	0.491993	0.984379	0.921895	1.21696	1.73491	0.889697	1.10124	1.08775	1.14212	1.12703	1.10839	1.1472	1.15742		1.11784	1.08117	1.12934	1.16205	1.18166
47	2.37748	0.491636	0.998572	0.925406	1.2314	1.71779	0.889271	1.12048	1.08806	1.14073	1.13278	1.10633	1.15195	1.15765		1.12164	1.08436	1.15923	1.16368	1.192
47.33	2.37722	0.489652	0.994689	0.922257	1.26257	1.73041	0.887019	1.10761	1.0866	1.15433	1.12902	1.10928	1.14187	1.15825		1.12601	1.08695	1.13078	1.16627	1.17625
47.67	2.39605	0.490888	1.0075	0.928815	1.25064	1.74186	0.889138	1.12922	1.09274	1.1578	1.13176	1.1165	1.16062	1.16513		1.12817	1.08788	1.14719	1.16603	1.18407
48	2.39933	0.48951	1.00683	0.926436	1.23561	1.74735	0.890364	1.11644	1.09568	1.1423	1.1445	1.11646	1.1648	1.16486		1.12107	1.08455	1.15555	1.16514	1.18568
48.33	2.38449	0.486682	0.990226	0.92365	1.22474	1.73316	0.885752	1.10623	1.08627	1.14149	1.12924	1.1067	1.13717	1.1586		1.12237	1.08488	1.14103	1.16715	1.19561
48.67	2.41083	0.488393	0.993529	0.928962	1.24304	1.74122	0.888085	1.11991	1.0946	1.14767	1.14025	1.11566	1.159	1.16959		1.1193	1.0844	1.15071	1.16538	1.1935
49	2.38359	0.485708	0.993975	0.922597	1.20754	1.74417	0.886166	1.10841	1.08581	1.15068	1.12619	1.10799	1.14245	1.15454		1.13083	1.08608	1.15405	1.1666	1.18487
49.33	2.37578	0.485399	0.978042	0.920966	1.2193	1.74989	0.885859	1.11164	1.08646	1.15525	1.13074	1.10881	1.1554	1.1579		1.12316	1.08607	1.15779	1.16803	1.20122
49.67	2.40265	0.486029	0.988976	0.9251	1.22871	1.75299	0.887192	1.10514	1.08883	1.13715	1.1288	1.11087	1.14762	1.15924		1.13561	1.08646	1.12306	1.16526	1.18257
50	2.4043	0.48465	0.993305	0.924081	1.23023	1.75427	0.888191	1.10827	1.08926	1.14976	1.13222	1.11384	1.15268	1.15918		1.12104	1.08412	1.14944	1.1652	1.19059
50.33	2.40533	0.484199	0.993662	0.928101	1.25444	1.76206	0.887378	1.10965	1.0886	1.14634	1.1337	1.11217	1.15247	1.16235		1.1199	1.08599	1.13947	1.16779	1.18939
50.67	2.40928	0.483498	1.00919	0.927716	1.24374	1.75639	0.890271	1.11454	1.08858	1.14866	1.13048	1.1127	1.16046	1.15611		1.12326	1.08377	1.14339	1.16843	1.19059
51	2.42912	0.48269	0.999197	0.925678	1.22491	1.76275	0.887458	1.10979	1.08934	1.14953	1.14151	1.1141	1.15279	1.15694		1.11793	1.08609	1.14622	1.16851	1.18858
51.33	2.40777	0.482167	0.99634	0.925938	1.22801	1.75464	0.887778	1.10599	1.08724	1.14235	1.13407	1.11588	1.13294	1.15754		1.12852	1.08694	1.13054	1.16879	1.18808
51.67	2.41609	0.481657	0.984379	0.920705	1.19702	1.74824	0.886072	1.10048	1.08782	1.15895	1.1395	1.11365	1.15049	1.15852		1.12715	1.08685	1.1385	1.17128	1.18487
52	2.40162	0.48035	0.991431	0.917976	1.19292	1.75622	0.886685	1.11041	1.08696	1.14496	1.13819	1.11393	1.13785	1.15914		1.12082	1.08497	1.15221	1.16836	1.19159
52.33	2.41092	0.480754	0.982326	0.91588	1.1893	1.75753	0.886445	1.11844	1.08843	1.15664	1.14108	1.11266	1.15545	1.16057		1.11955	1.09076	1.1552	1.1707	1.21436
52.67	2.4117	0.479304	0.979648	0.91297	1.21053	1.76637	0.885566	1.11055	1.08843	1.1567	1.13074	1.11309	1.15566	1.16239		1.11663	1.0862	1.15589	1.17015	1.22189
53	2.40555	0.481146	0.992279	0.916073	1.19678	1.76124	0.885099	1.11122	1.08773	1.1615	1.13591	1.10995	1.1472	1.1623		1.13035	1.08823	1.14305	1.1737	1.45331
53.33	2.41319	0.479589	0.983888	0.914397	1.20322	1.76632	0.886299	1.1163	1.08775	1.1449	1.13385	1.11255	1.15467	1.16221		1.12151	1.08862	1.15238	1.17814	1.3545
53.67	2.4304	0.480872	0.984602	0.920252	1.19982	1.75866	0.886472	1.12613	1.09525	1.15363	1.13943	1.11843	1.18062	1.17025		1.12228	1.09038	1.15468	1.17332	1.33835
54	2.42652	0.479554	0.996206	0.918882	1.18965	1.76785	0.884659	1.11673	1.08914	1.14322	1.13305	1.11207	1.15378	1.1625		1.14018	1.09085	1.16315	1.17649	1.33775
54.33	2.42366	0.478817	0.991654	0.91972	1.18901	1.77492	0.884566	1.11706	1.08934	1.132	1.13909	1.11472	1.16615	1.16321		1.14569	1.09003	1.14518	1.17379	1.36784
54.67	2.43667	0.476299	0.97706	0.917353	1.20854	1.76511	0.885393	1.12718	1.09105	1.15971	1.12834	1.11533	1.16594	1.16395		1.14895	1.09199	1.15503	1.17592	1.33885
55	2.42637	0.474944	0.99152	0.917908	1.20871	1.77459	0.88386	1.10447	1.09073	1.14548	1.1362	1.11555	1.15957	1.16481		1.14807	1.08968	1.15532	1.17663	1.34838
55.33	2.4325	0.474897	0.982951	0.920637	1.20713	1.77415	0.88438	1.1164	1.09169	1.15537	1.12604	1.11616	1.15947	1.16404		1.14214	1.09224	1.13763	1.17608	1.37135
55.67	2.4347	0.474564	0.99094	0.922767	1.21152	1.76851	0.883087	1.11611	1.09417	1.16254	1.13644	1.11408	1.16187	1.16352		1.14163	1.09196	1.1571	1.17586	1.36343
56	2.43073	0.474505	1.00089	0.923616	1.21947	1.77026	0.885353	1.10476	1.09372	1.16347	1.14052	1.11978	1.15843	1.16643		1.13793	1.0932	1.15307	1.17446	1.35009
56.33	2.43929	0.473661	0.990761	0.92348	1.22906	1.77868	0.88418	1.11844	1.09042	1.1689	1.13695	1.11814	1.16245	1.16109		1.1417	1.092	1.15676	1.17546	1.37296
56.67	2.43307	0.473744	0.994109	0.921736	1.21924	1.7709	0.88406	1.11602	1.09227	1.15282	1.13082	1.11829	1.15138	1.16357		1.14569	1.09284	1.14477	1.17655	1.39141
57	2.44579	0.476239	1.00201	0.924692	1.23906	1.79344	0.889031	1.11245	1.09912	1.17336	1.1404	1.12505	1.16396	1.17476		1.15032	1.09356	1.13959	1.17629	1.39773
57.33	2.44376	0.475514	0.997501	0.924839	1.23842	1.78701	0.887898	1.10609	1.09861	1.17289	1.14821	1.12583	1.17566	1.173		1.1461	1.09529	1.16534	1.17573	1.4194
57.67	2.43756	0.473673	0.987548	0.92151	1.23082	1.77755	0.885166	1.12618	1.09267	1.16428	1.14045	1.11757	1.15649	1.16611		1.14956	1.0943	1.14408	1.17681	1.40847
58	2.43717	0.471725	0.983442	0.924035	1.23602	1.78482	0.884779	1.10675	1.09224	1.15317	1.12344	1.11562	1.17456	1.16503		1.15133	1.09427	1.16004	1.17619	1.40666
58.33	2.44961	0.472319	0.987905	0.924443	1.22778	1.78809	0.883527	1.11212	1.09317	1.15236	1.13341	1.11717	1.16568	1.16585		1.14347	1.09413	1.14622	1.17827	1.41348
58.67	2.43309	0.470929	0.991386	0.9257	1.23345	1.78817	0.88426	1.11383	1.09558	1.14872	1.14297	1.11616	1.16218	1.16427		1.14205	1.0937	1.1548	1.17696	1.42732
59	2.47357	0.472461	1.00085	0.9286	1.22462	1.78533	0.886552	1.12941	1.09943	1.16728	1.14496	1.12714	1.16161	1.17318		1.14585	1.09738	1.14754	1.17826	1.44889
59.33	2.44143	0.470738	0.994332	0.92655	1.22076	1.78642	0.882834	1.12181	1.09654	1.14843	1.13732	1.11756	1.17278	1.16663		1.16233	1.09637	1.16137	1.17978	1.44879
59.67	2.46689	0.469895	1.00129	0.928317	1.21515	1.78886	0.88382	1.11497	1.09501	1.15421	1.13683	1.1186	1.16255	1.1647		1.16401	1.09521	1.151	1.17772	1.46986

## Sheet: Figure 1-figure supplement 4B
	PBP1B + LpoB					PBP1B + LpoB + Ampicillin					PBP1B + LpoB + Moenomycin					PBP1B +LpoB (only labelled lipid II)
	Atto550/Atto647n		Atto550		Atto647n	Atto550/Atto647n		Atto550		Atto647n	Atto550/Atto647n		Atto550		Atto647n	Atto550/Atto647n		Atto550		Atto647n
time (min)	FI680nm	FI590nm	FI680nm	FI590nm	FI680nm	FI680nm	FI590nm	FI680nm	FI590nm	FI680nm	FI680nm	FI590nm	FI680nm	FI590nm	FI680nm	FI680nm	FI590nm	FI680nm	FI590nm	FI680nm
0	1	1	1	1	1	1	1	1	1	1	1	1	1	1	1	1	1	1	1	1
0.33	1.32135	0.905218	0.993239	0.999648	1.04863	1.09643	1.01598	1.00415	0.997868	1.02119	0.978079	1.00744	1.09387	1.05629	0.984969	1.03667	0.98535	1.01695	1.01511	1.02248
0.67	1.48818	0.821615	0.984975	0.989172	1.05677	1.12349	1.00825	1.01123	0.988999	1.01986	1.00163	1.01529	1.15004	1.11252	0.982	1.06852	0.970204	0.991395	0.996454	1.01663
1	1.61679	0.772603	0.96732	0.98057	1.06697	1.17717	1.00693	0.98149	0.985793	1.01204	0.977469	1.01037	1.15345	1.15137	0.985804	1.12071	0.953816	0.993248	1.00524	1.01314
1.33	1.62097	0.740483	0.984148	0.987633	1.05017	1.16838	1.0029	0.984008	0.97689	1.01157	1.01233	1.0203	1.16672	1.13441	0.987382	1.13354	0.94678	1.00172	0.987296	1.03233
1.67	1.66794	0.727478	1.00481	0.99429	1.08256	1.20053	1.01627	0.993331	0.985929	1.02244	1.02314	1.03112	1.18596	1.18126	0.989794	1.16637	0.933686	0.989144	0.985868	1.02381
2	1.75576	0.714311	1.01615	1.01815	1.10624	1.22515	1.04385	1.01837	1.02255	1.03691	1.03696	1.04818	1.25345	1.25249	0.969382	1.19519	0.927529	0.993381	0.989968	1.03008
2.33	1.80887	0.699031	1.04027	1.00504	1.09321	1.24584	1.03528	1.02307	1.01903	1.0391	1.0432	1.04729	1.25209	1.26791	0.998423	1.21398	0.924019	1.01344	1.00037	1.03983
2.67	1.75946	0.687871	1.04147	0.984723	1.11175	1.26487	1.04153	1.03484	1.02042	1.03668	1.05875	1.0545	1.26051	1.24659	0.995546	1.26226	0.91945	1.00066	0.999866	1.03203
3	1.75576	0.681117	1.03313	0.996032	1.10425	1.27726	1.04092	1.03464	1.02565	1.04614	1.05848	1.05641	1.28255	1.27205	0.995361	1.25651	0.913905	1.00377	1.00507	1.03993
3.33	1.8721	0.681798	1.02434	1.00936	1.12888	1.27079	1.03949	1.03811	1.03534	1.05365	1.06048	1.07509	1.28672	1.28751	0.985804	1.2919	0.911157	1.00973	1.00828	1.03819
3.67	1.91107	0.676316	1.0619	1.03593	1.1691	1.30015	1.05536	1.04423	1.0403	1.0786	1.07403	1.07594	1.31736	1.29433	0.989887	1.30398	0.90495	0.999868	1.00701	1.02843
4	1.89518	0.672286	1.06566	1.04059	1.16237	1.31375	1.0548	1.04226	1.03549	1.06999	1.07332	1.07183	1.31719	1.29402	0.993227	1.31998	0.903195	1.01211	1.01333	1.03254
4.33	1.89165	0.668542	1.06724	1.04765	1.14652	1.30154	1.05537	1.04185	1.03699	1.08391	1.06644	1.07594	1.32715	1.28988	0.984969	1.35372	0.900795	1.01562	1.0164	1.0347
4.67	1.88704	0.668703	1.06566	1.05247	1.12035	1.31354	1.06034	1.05757	1.05101	1.08102	1.07179	1.08018	1.3337	1.3166	0.972258	1.35567	0.905396	1.02873	1.02485	1.03213
5	1.92681	0.668613	1.06468	1.03695	1.14928	1.31876	1.06734	1.07207	1.06379	1.09807	1.07284	1.09892	1.35889	1.33273	0.970681	1.3752	0.899702	1.0045	1.01956	1.04424
5.33	1.95799	0.66856	1.08527	1.05562	1.15711	1.33728	1.07633	1.07717	1.0629	1.09932	1.10598	1.09814	1.34196	1.328	0.997495	1.38163	0.893693	1.01661	1.01909	1.03182
5.67	1.89782	0.666661	1.10044	1.05334	1.14902	1.33447	1.08154	1.07805	1.06471	1.0933	1.10584	1.09952	1.34894	1.32048	0.96465	1.39436	0.888363	1.01748	1.01805	1.02258
6	1.91781	0.658098	1.05664	1.03953	1.09693	1.32302	1.06343	1.05839	1.05543	1.089	1.09707	1.09324	1.33668	1.3155	0.96697	1.43139	0.885168	1.00311	1.0179	1.03357
6.33	1.90356	0.661466	1.07325	1.05436	1.10643	1.34157	1.07174	1.07833	1.06145	1.08493	1.09748	1.10207	1.37472	1.32255	0.969289	1.43294	0.882851	1.01331	1.01805	1.03357
6.67	1.9293	0.658886	1.08226	1.04044	1.09334	1.34332	1.06869	1.07751	1.05185	1.10346	1.08911	1.09446	1.34621	1.31421	0.97365	1.42096	0.871644	1.0184	1.01738	1.03788
7	1.93597	0.654282	1.1063	1.02423	1.11458	1.34308	1.07166	1.08683	1.06628	1.07547	1.09365	1.10225	1.35949	1.3238	0.962052	1.42308	0.865055	1.04091	1.02267	1.035
7.33	1.94169	0.650198	1.05559	1.02889	1.15198	1.34683	1.07273	1.08581	1.06824	1.11347	1.08176	1.10721	1.37311	1.33664	0.973557	1.42045	0.85605	1.03475	1.02437	1.05471
7.67	1.93693	0.647654	1.19841	1.01274	1.13453	1.35181	1.0749	1.09391	1.06708	1.10354	1.10212	1.10697	1.36749	1.3453	0.992299	1.42988	0.852243	1.01417	1.01485	1.02474
8	1.97852	0.646329	1.12261	1.02227	1.14376	1.34592	1.08328	1.07275	1.0702	1.1116	1.10811	1.12219	1.36774	1.3388	0.985155	1.43594	0.845737	1.00616	1.00183	1.0233
8.33	1.89091	0.642083	1.04215	1.03423	1.07743	1.3471	1.08155	1.08275	1.07185	1.10284	1.11703	1.12559	1.40494	1.3487	0.980423	1.41668	0.836368	1.0002	1.00302	1.04722
8.67	1.90291	0.640525	1.0429	1.02827	1.13389	1.37909	1.08652	1.07785	1.07438	1.12982	1.12594	1.12196	1.40349	1.35426	0.999536	1.46847	0.829598	1.0096	0.993362	1.07114
9	1.93387	0.642495	1.03666	1.02564	1.09443	1.36133	1.08955	1.09684	1.07584	1.10018	1.10432	1.11799	1.4217	1.36708	1.01011	1.42405	0.819715	1.00583	1.00234	1.0698
9.33	1.95492	0.640077	1.06731	1.04474	1.10713	1.39105	1.089	1.09146	1.07929	1.12028	1.10086	1.11563	1.42749	1.36706	1.0412	1.46049	0.824648	1.01476	1.00437	1.09988
9.67	1.95048	0.637264	1.05995	1.01094	1.09334	1.36368	1.0877	1.07948	1.07424	1.10268	1.09321	1.1007	1.37515	1.33897	1.05326	1.48705	0.819003	1.02827	1.01223	1.08099
10	1.91666	0.634685	0.99707	0.987837	1.12009	1.31478	1.08269	1.03688	1.06877	1.0786	1.07708	1.09857	1.384	1.35443	1.04435	1.52773	0.824119	1.01701	1.01013	1.09557
10.33	1.96139	0.63447	1.0743	0.995291	1.11034	1.35601	1.09084	1.07751	1.0849	1.10503	1.08897	1.11321	1.41183	1.36495	1.05307	1.54988	0.823109	1.01681	1.01496	1.08356
10.67	1.91231	0.630923	1.02329	0.985613	1.11509	1.33894	1.08229	1.09513	1.07697	1.09666	1.10432	1.12827	1.40128	1.36786	1.04574	1.55413	0.822182	1.03939	1.03186	1.09351
11	1.94325	0.628092	1.01142	0.985854	1.13722	1.36894	1.08588	1.06649	1.07967	1.09885	1.12878	1.15181	1.41898	1.39101	1.04027	1.59584	0.822546	1.02681	1.0331	1.09926
11.33	1.87805	0.615768	1.10525	1.00471	1.12818	1.3281	1.07639	1.06084	1.07168	1.10174	1.13586	1.16021	1.4377	1.39327	1.05391	1.63928	0.827926	1.05223	1.04016	1.08612
11.67	1.87576	0.612704	1.13064	0.972653	1.16243	1.33293	1.08111	1.06771	1.07719	1.136	1.14996	1.16858	1.46757	1.39089	1.06792	1.70016	0.832826	1.04779	1.04136	1.08161
12	1.84845	0.608943	1.11336	1.04261	1.17642	1.35939	1.08871	1.08105	1.08366	1.14358	1.16148	1.17453	1.45745	1.38937	1.0591	1.7277	0.831352	1.05435	1.04114	1.08191
12.33	1.74662	0.607492	1.16423	1.06836	1.16705	1.32752	1.08718	1.06962	1.0891	1.14225	1.16205	1.17952	1.45115	1.39748	1.04685	1.72969	0.828124	1.04918	1.0402	1.07483
12.67	1.88386	0.612543	1.21501	1.05295	1.17712	1.36525	1.10025	1.12651	1.10938	1.19215	1.17496	1.18389	1.51251	1.4103	1.06708	1.75535	0.826486	1.06447	1.03821	1.09947
13	1.92688	0.613887	1.15559	1.06337	1.1922	1.40969	1.10974	1.12487	1.12015	1.17549	1.16642	1.17989	1.52596	1.43506	1.04639	1.75188	0.819301	1.0513	1.03757	1.08212
13.33	2.00201	0.62116	1.17602	1.09113	1.20484	1.43229	1.12459	1.1606	1.13755	1.20419	1.17503	1.18906	1.57796	1.46448	1.06931	1.76548	0.816603	1.0427	1.03783	1.0813
13.67	2.00539	0.623077	1.1936	1.09376	1.20772	1.44791	1.12994	1.14223	1.13573	1.19184	1.17984	1.18864	1.57796	1.48026	1.07042	1.77555	0.814534	1.05646	1.03527	1.08284
14	2.04805	0.623059	1.17902	1.08955	1.20747	1.45428	1.13331	1.14597	1.13682	1.19614	1.1729	1.19225	1.59362	1.47266	1.05576	1.79279	0.810081	1.04984	1.03282	1.08746
14.33	2.06985	0.627125	1.18488	1.1029	1.23897	1.47678	1.13607	1.13406	1.14456	1.20364	1.18065	1.19157	1.60153	1.49712	1.05613	1.79875	0.809469	1.02992	1.03512	1.05902
14.67	2.1554	0.633305	1.18887	1.10946	1.27194	1.47062	1.1339	1.16679	1.14318	1.19567	1.17327	1.19161	1.59072	1.46854	1.08137	1.8039	0.805132	1.04879	1.03527	1.06734
15	2.1924	0.632589	1.17301	1.10381	1.2874	1.47002	1.12708	1.15264	1.13825	1.19715	1.18445	1.19065	1.56102	1.4738	1.0501	1.80945	0.802284	1.04998	1.0326	1.09351
15.33	2.23699	0.639306	1.18128	1.09684	1.29093	1.49162	1.14083	1.16264	1.15573	1.21053	1.17605	1.19789	1.60043	1.52008	1.03906	1.80599	0.797202	1.05435	1.03117	1.07812
15.67	2.23506	0.637408	1.18624	1.09369	1.301	1.52618	1.14846	1.19177	1.16651	1.21459	1.18973	1.19863	1.63234	1.52616	1.05066	1.82373	0.796342	1.0472	1.02914	1.08448
16	2.24067	0.636404	1.1912	1.1131	1.29439	1.53451	1.15184	1.18721	1.16683	1.21788	1.19807	1.19979	1.61915	1.52371	1.05771	1.84171	0.792087	1.06348	1.03275	1.10121
16.33	2.25851	0.635562	1.17519	1.0935	1.29176	1.51874	1.15055	1.18142	1.16399	1.21725	1.18919	1.2012	1.58996	1.52409	1.05363	1.84417	0.786741	1.04071	1.02583	1.0776
16.67	2.2474	0.631908	1.17617	1.09548	1.28811	1.53675	1.14256	1.18789	1.15519	1.21334	1.19028	1.19415	1.56987	1.51015	1.07126	1.84124	0.783148	1.04554	1.02415	1.08191
17	2.26028	0.634541	1.19818	1.09439	1.29426	1.5385	1.15585	1.19599	1.17031	1.23031	1.19424	1.20165	1.61719	1.52052	1.07218	1.85468	0.781609	1.05157	1.02511	1.07278
17.33	2.24757	0.628684	1.19991	1.08796	1.30562	1.56309	1.15059	1.19775	1.16387	1.22593	1.18157	1.19037	1.56213	1.51391	1.06495	1.8468	0.778894	1.04058	1.02361	1.07401
17.67	2.28077	0.633341	1.21486	1.10017	1.28329	1.58028	1.16236	1.1951	1.17442	1.23931	1.18909	1.20272	1.61251	1.52534	1.05391	1.84154	0.768962	1.0278	1.01722	1.08058
18	2.2741	0.631012	1.18135	1.0928	1.29908	1.59082	1.16223	1.1983	1.1777	1.23626	1.19604	1.20074	1.57498	1.52504	1.04945	1.86548	0.772455	1.05018	1.0224	1.08694
18.33	2.28291	0.630063	1.1924	1.09309	1.29144	1.58974	1.16324	1.1985	1.17824	1.21358	1.19925	1.20329	1.58077	1.53032	1.06569	1.87612	0.769641	1.038	1.02126	1.08458
18.67	2.26767	0.630332	1.19766	1.09127	1.30863	1.60671	1.16416	1.20749	1.17831	1.2307	1.18187	1.20238	1.59991	1.537	1.04277	1.89064	0.769624	1.03694	1.02149	1.06426
19	2.28283	0.628522	1.17467	1.09172	1.30793	1.58107	1.16002	1.19449	1.1776	1.21749	1.18973	1.2038	1.57549	1.53605	1.07868	1.89245	0.76542	1.03912	1.02062	1.07627
19.33	2.28839	0.626767	1.17767	1.0937	1.31646	1.59831	1.16044	1.20442	1.17893	1.24001	1.19431	1.20502	1.58289	1.53615	1.06485	1.90656	0.76244	1.03376	1.02106	1.09485
19.67	2.3003	0.627555	1.17339	1.11549	1.29093	1.58418	1.16031	1.18843	1.18172	1.23899	1.19766	1.20528	1.5846	1.54114	1.06717	1.91017	0.759974	1.04587	1.01806	1.05861
20	2.27888	0.625513	1.17895	1.09986	1.30973	1.60614	1.15997	1.19224	1.17898	1.2368	1.20102	1.20509	1.61447	1.54139	1.04732	1.91188	0.756133	1.03164	1.01882	1.06426
20.33	2.30062	0.624295	1.19405	1.09945	1.31127	1.60109	1.16265	1.19966	1.18408	1.24572	1.19641	1.21489	1.62979	1.54982	1.06458	1.9273	0.754544	1.03495	1.01675	1.066
20.67	2.29567	0.625602	1.17039	1.10429	1.31332	1.60674	1.16578	1.21014	1.18384	1.25612	1.20603	1.20852	1.60043	1.54559	1.06996	1.93023	0.751647	1.0274	1.01516	1.05769
21	2.30608	0.622324	1.17579	1.0909	1.28913	1.61034	1.16258	1.21157	1.18449	1.23649	1.20867	1.2171	1.5743	1.54815	1.0591	1.92343	0.749495	1.04991	1.01647	1.07155
21.33	2.28081	0.623847	1.17812	1.09066	1.31306	1.61387	1.15997	1.20027	1.18034	1.24017	1.19936	1.20894	1.59353	1.54025	1.06959	1.94242	0.747459	1.04462	1.01578	1.06806
21.67	2.29292	0.621428	1.18188	1.09159	1.31685	1.61384	1.15952	1.213	1.18034	1.24001	1.20457	1.21084	1.57183	1.54148	1.04964	1.94363	0.744959	1.03614	1.01573	1.06723
22	2.29677	0.623059	1.18706	1.09539	1.29311	1.60212	1.16221	1.19878	1.18225	1.22374	1.1999	1.20974	1.5686	1.5389	1.06662	1.94959	0.741698	1.03515	1.01213	1.06251
22.33	2.30924	0.622754	1.28788	1.15457	1.33051	1.61248	1.1594	1.20919	1.18012	1.23946	1.19722	1.21115	1.60485	1.54363	1.06829	1.95215	0.741599	1.02866	1.01269	1.066
22.67	2.30926	0.621357	1.19428	1.09183	1.3307	1.61574	1.15903	1.20898	1.18224	1.22789	1.19831	1.2095	1.60255	1.54532	1.06049	1.96023	0.740308	1.03859	1.01603	1.0699
23	2.29387	0.618706	1.20562	1.09192	1.31473	1.61294	1.15708	1.21055	1.17918	1.24236	1.19092	1.20922	1.59328	1.5442	1.06189	1.9897	0.734514	1.02999	1.01139	1.05492
23.33	2.30322	0.615714	1.20254	1.10294	1.30568	1.6136	1.15388	1.22198	1.18322	1.24838	1.2083	1.21543	1.63634	1.5554	1.06124	1.97909	0.732379	1.04164	1.01223	1.06487
23.67	2.29733	0.616287	1.1918	1.09283	1.32647	1.62381	1.15541	1.19959	1.18293	1.22108	1.19844	1.21045	1.64528	1.5465	1.0591	1.99593	0.731568	1.03171	1.01055	1.06087
24	2.27672	0.608244	1.18744	1.08082	1.2899	1.60342	1.14357	1.2015	1.17028	1.20521	1.208	1.20146	1.584	1.53212	1.05752	1.9968	0.729813	1.03581	1.01237	1.06015
24.33	2.30844	0.615356	1.1776	1.07974	1.27637	1.62046	1.155	1.19456	1.18068	1.23766	1.2125	1.2123	1.64077	1.54314	1.05799	1.9971	0.72728	1.03568	1.01454	1.06611
24.67	2.33221	0.614693	1.22876	1.07765	1.34418	1.63861	1.15417	1.19762	1.18368	1.23367	1.20813	1.21467	1.65966	1.54695	1.06096	1.99764	0.725244	1.02376	1.01017	1.05553
25	2.31792	0.614639	1.19871	1.09597	1.29375	1.62448	1.15322	1.21429	1.18137	1.24126	1.20484	1.21394	1.64843	1.54684	1.0669	2.0001	0.722645	1.03376	1.0076	1.06354
25.33	2.29965	0.613116	1.19345	1.08467	1.30838	1.62913	1.15307	1.18639	1.183	1.22711	1.21057	1.21311	1.65796	1.54771	1.07432	2.01431	0.721338	1.02515	1.00854	1.04968
25.67	2.30112	0.612328	1.19315	1.06893	1.31576	1.62967	1.1528	1.21436	1.18379	1.24447	1.21115	1.21119	1.65498	1.55033	1.05966	2.0301	0.719914	1.01622	1.00865	1.06251
26	2.30465	0.611934	1.17692	1.08599	1.31755	1.63387	1.1537	1.19422	1.1842	1.24853	1.2085	1.21401	1.67166	1.55419	1.06411	2.01296	0.716719	1.03515	1.00669	1.09156
26.33	2.30238	0.61231	1.17347	1.07989	1.31069	1.63505	1.15462	1.21218	1.18698	1.24048	1.21741	1.22072	1.6766	1.55907	1.06216	2.0364	0.716322	1.02615	1.01005	1.05697
26.67	2.29772	0.609749	1.23883	1.08695	1.32134	1.63112	1.15307	1.21204	1.1864	1.24079	1.21697	1.21552	1.67081	1.55295	1.06049	2.0369	0.714004	1.01992	1.00536	1.06128
27	2.31418	0.610429	1.17219	1.09318	1.3146	1.62623	1.15274	1.21055	1.18527	1.23493	1.21979	1.21572	1.66902	1.55111	1.07228	2.04084	0.710197	1.02608	1.00492	1.04537
27.33	2.3137	0.609964	1.19766	1.0912	1.32256	1.64623	1.15414	1.22572	1.18507	1.23133	1.2039	1.2181	1.656	1.54874	1.06216	2.04704	0.709634	1.03449	1.00918	1.06754
27.67	2.376	0.610035	1.19292	1.08043	1.31178	1.64544	1.15228	1.21062	1.18253	1.23352	1.20329	1.21449	1.67285	1.54735	1.06365	2.05094	0.707499	1.02668	1.00434	1.0544
28	2.29803	0.602529	1.22928	1.09719	1.33564	1.62816	1.14461	1.20919	1.17437	1.26019	1.19468	1.20751	1.61872	1.53512	1.0656	2.06616	0.705694	1.019	1.00355	1.0505
28.33	2.32533	0.605879	1.17159	1.08807	1.32211	1.63768	1.15013	1.21279	1.18619	1.25933	1.20617	1.21593	1.65387	1.55111	1.08285	2.066	0.70293	1.03244	1.00229	1.05286
28.67	2.36725	0.605503	1.18556	1.08343	1.30472	1.62653	1.14224	1.20551	1.17623	1.22366	1.20318	1.21117	1.63481	1.54137	1.08044	2.07798	0.703956	1.03528	1.00321	1.05913
29	2.30738	0.608226	1.15536	1.07841	1.30395	1.64133	1.15121	1.21586	1.18548	1.24603	1.20871	1.2199	1.65906	1.55859	1.06569	2.08307	0.702599	1.028	1.00378	1.04588
29.33	2.33771	0.605163	1.17046	1.0773	1.28618	1.64009	1.15217	1.20225	1.18778	1.25792	1.21538	1.22136	1.67991	1.56066	1.06495	2.08004	0.698676	1.01516	1.00108	1.05861
29.67	2.35467	0.610411	1.18646	1.08082	1.32307	1.65556	1.15018	1.21626	1.18781	1.25166	1.21237	1.22046	1.67702	1.55821	1.07051	2.08145	0.696474	1.02059	0.99879	1.0386
30	2.33157	0.606936	1.18038	1.07403	1.32961	1.64831	1.15024	1.20837	1.18563	1.22374	1.21081	1.21736	1.67021	1.55848	1.08554	2.09064	0.69558	1.01006	1.00163	1.05841
30.33	2.33256	0.603049	1.18669	1.08375	1.29478	1.66142	1.15061	1.21837	1.18838	1.24752	1.20691	1.22259	1.65277	1.55837	1.07506	2.07158	0.692915	1.03224	0.998437	1.06826
30.67	2.3297	0.601616	1.17204	1.08961	1.29779	1.6632	1.14969	1.21089	1.193	1.25737	1.2331	1.22796	1.6903	1.56777	1.08091	2.10239	0.691574	1.02701	0.998504	1.05728
31	2.30708	0.599377	1.20141	1.08021	1.30677	1.66	1.14121	1.19388	1.1777	1.25057	1.21721	1.21607	1.66919	1.54553		2.09792	0.687568	1.02555	0.998941	1.06333
31.33	2.31615	0.599574	1.18286	1.08708	1.27739	1.64801	1.1421	1.213	1.17538	1.23266	1.20708	1.21381	1.68417	1.55016		2.11509	0.685565	1.03224	1.00145	1.08571
31.67	2.34419	0.603353	1.18729	1.0767	1.48422	1.66716	1.15041	1.20864	1.19037	1.2325	1.20322	1.21924	1.66502	1.5547		2.10916	0.686095	1.02727	0.995681	1.05605
32	2.45059	0.604357	1.17369	1.08347	1.30222	1.65897	1.15063	1.19714	1.19213	1.23845	1.21775	1.22291	1.66221	1.56063		2.08994	0.676494	1.03197	0.989766	1.04404
32.33	2.33217	0.597782	1.18188	1.07813	1.28066	1.64819	1.13948	1.20823	1.17928	1.24971	1.2083	1.21191	1.69694	1.55147		2.12913	0.682073	1.01734	0.996135	1.05574
32.67	2.3262	0.599807	1.17692	1.07622	1.33064	1.67112	1.14868	1.22817	1.1888	1.24368	1.2084	1.22265	1.68587	1.56108		2.12489	0.681609	1.03038	0.998588	1.02843
33	2.35833	0.600469	1.17752	1.07253	1.28419	1.67175	1.15037	1.22205	1.19069	1.25065	1.22046	1.22602	1.704	1.56051		2.12452	0.679027	1.02555	0.996505	1.07729
33.33	2.30571	0.598714	1.18872	1.063	1.29613	1.67405	1.15092	1.21558	1.19066	1.26605	1.21786	1.22587	1.69055	1.56378		2.13893	0.676064	1.01926	0.995379	1.0581
33.67	2.34977	0.599502	1.177	1.06469	1.35559	1.67163	1.14969	1.21109	1.18752	1.2641	1.21247	1.22438	1.70196	1.55744		2.14038	0.674706	1.01225	0.990388	1.03901
34	2.32576	0.599036	1.17459	1.08289	1.31101	1.688	1.14732	1.20762	1.18953	1.24673	1.22192	1.22785	1.71157	1.56387		2.12734	0.666049	1.01483	0.981936	1.04609
34.33	2.32427	0.597943	1.27075	1.06778	1.30222	1.67637	1.14783	1.21191	1.18972	1.2422	1.23442	1.22516	1.66502	1.56142		2.12287	0.670568	1.01973	0.988758	1.05081
34.67	2.36972	0.596618	1.18812	1.09038	1.31922	1.68317	1.15072	1.21558	1.1908	1.24869	1.22426	1.22779	1.68094	1.56777		2.14391	0.671031	1.01827	0.991514	1.04948
35	2.39031	0.603282	1.15393	1.08454	1.30677	1.68873	1.14765	1.21225	1.19172	1.25049	1.20881	1.22672	1.68732	1.56515		2.15788	0.668962	1.01615	0.989733	1.05122
35.33	2.31736	0.592784	1.16723	1.05875	1.29568	1.67145	1.13917	1.20721	1.18244	1.21694	1.2104	1.21639	1.70357	1.55031		2.14115	0.665718	1.02165	0.990018	1.04896
35.67	2.34382	0.597334	1.1945	1.06595	1.30947	1.67915	1.14814	1.22001	1.19098	1.25643	1.21609	1.22348	1.69481	1.56515		2.16694	0.665072	1.02462	0.992236	1.07637
36	2.34529	0.596439	1.17527	1.07029	1.33853	1.69142	1.14498	1.22491	1.19243	1.25901	1.225	1.22659	1.70587	1.57103		2.166	0.658815	1.00927	0.980003	1.03264
36.33	2.42621	0.595059	1.17564	1.09022	1.33205	1.68888	1.14601	1.21586	1.19	1.26026	1.22256	1.22527	1.71191	1.56663		2.18711	0.662986	1.01536	0.989027	1.0311
36.67	2.35724	0.596887	1.17279	1.06701	1.31563	1.7042	1.14695	1.22048	1.19237	1.22273	1.22084	1.22864	1.71796	1.56651		2.17758	0.661447	1.02198	0.986523	1.05091
37	2.30747	0.588628	1.17024	1.06845	1.3103	1.68115	1.13505	1.20551	1.1878	1.24478	1.22633	1.22687	1.62145	1.55738		2.18539	0.658782	1.00218	0.986758	1.0502
37.33	2.33691	0.595041	1.16978	1.06	1.28804	1.69661	1.14445	1.2181	1.19803	1.24431	1.22538	1.23059	1.64323	1.56676		2.18799	0.656613	1.01628	0.984288	1.05122
37.67	2.3446	0.594217	1.19097	1.09878	1.313	1.69752	1.14533	1.21109	1.19342	1.27536	1.21548	1.23164	1.64443	1.56433		2.18735	0.655636	1.01192	0.987296	1.02884
38	2.34523	0.593967	1.15281	1.06834	1.28227	1.68864	1.13987	1.21905	1.19486	1.26245	1.22477	1.23278	1.6497	1.5626		2.20398	0.654047	1.01529	0.987632	1.031
38.33	2.35322	0.591208	1.15867	1.06615	1.3241	1.68767	1.14325	1.21545	1.19257	1.24994	1.22738	1.23131	1.6514	1.56794		2.21475	0.653021	0.997485	0.985918	1.03131
38.67	2.3514	0.592354	1.16039	1.07333	1.36907	1.70404	1.14524	1.21456	1.19283	1.24541	1.22273	1.23258	1.66017	1.57219		2.20411	0.652889	1.01059	0.985464	1.06867
39	2.34265	0.592928	1.17219	1.06858	1.43277	1.72664	1.14388	1.2162	1.19231	1.263	1.22223	1.23186	1.67319	1.57229		2.21624	0.650372	1.00596	0.9837	1.03562
39.33	2.33947	0.591154	1.13786	1.051	1.87445	1.70713	1.14294	1.20572	1.19585	1.2605	1.22731	1.22663	1.68996	1.57745		2.21226	0.650571	1.02191	0.984406	1.04937
39.67	2.34562	0.590491	1.18376	1.08536	1.6335	1.72009	1.14487	1.23273	1.1973	1.25651	1.21823	1.22681	1.70085	1.57301		2.22139	0.647062	1.00457	0.98496	1.04712
40	2.34308	0.591853	1.1966	1.05621	1.6702	1.71229	1.14358	1.22545	1.19317	1.2659	1.22463	1.23205	1.72017	1.57635		2.20519	0.646383	1.02125	0.986254	1.04126
40.33	2.3645	0.588664	1.14762	1.05202	1.67719	1.71202	1.14202	1.20817	1.19491	1.24963	1.21657	1.22914	1.73413	1.57612		2.20115	0.643536	1.01039	0.981784	1.04239
40.67	2.3685	0.591154	1.135	1.06684	1.68136	1.72003	1.14438	1.2311	1.19851	1.2666	1.21992	1.23374	1.72443	1.57204		2.21031	0.642377	1.01522	0.981784	1.02689
41	2.3553	0.590635	1.14432	1.07865	1.62753	1.71658	1.14033	1.21545	1.1983	1.24736	1.22487	1.23358	1.72715	1.57631		2.21469	0.641897	1.02151	0.983229	1.05553
41.33	2.32065	0.589614	1.17482	1.09445	1.28823	1.72966	1.14176	1.23743	1.19672	1.25815	1.23192	1.23553	1.69328	1.57658		2.23863	0.638255	0.983319	0.983263	1.04096
41.67	2.35915	0.587751	1.16505	1.07301	1.31024	1.72039	1.14062	1.22021	1.19591	1.25721	1.229	1.23194	1.70085	1.57259		2.24112	0.637212	1.01026	0.983582	1.04363
42	2.33925	0.586819	1.16498	1.08245	1.30459	1.70256	1.13978	1.22885	1.19897	1.26824	1.22629	1.23569	1.72553	1.57316		2.24459	0.638917	1.02284	0.980759	1.03121
42.33	2.37762	0.589005	1.13876	1.05327	1.26796	1.71555	1.13809	1.22164	1.19578	1.26996	1.23114	1.23593	1.7137	1.56845		2.25149	0.638172	1.00887	0.982456	1.01591
42.67	2.3535	0.585637	1.167	1.08879	1.32191	1.71978	1.14011	1.23981	1.19656	1.2598	1.22162	1.23652	1.71243	1.57077		2.23907	0.635011	1.01357	0.981179	1.04475
43	2.35164	0.588431	1.18083	1.03675	1.32968	1.71906	1.14116	1.22776	1.19672	1.24713	1.22846	1.23849	1.70009	1.57128		2.25405	0.634117	1.01503	0.979667	1.03428
43.33	2.44072	0.587966	1.17625	1.08699	1.37452	1.72368	1.13978	1.21198	1.19566	1.26269	1.22504	1.23741	1.66604	1.57124		2.23573	0.628373	0.999073	0.972912	1.03716
43.67	2.36601	0.585583	1.20862	1.08994	1.36618	1.73918	1.13893	1.20864	1.19598	1.27418	1.22819	1.23614	1.69328	1.57401		2.24354	0.632577	1.02257	0.979969	1.04588
44	2.34438	0.585852	1.14154	1.02544	1.36907	1.73534	1.1421	1.21599	1.20004	1.27129	1.23225	1.23245	1.70621	1.58108		2.25691	0.629085	1.01052	0.976709	1.04537
44.33	2.34917	0.586425	1.17392	1.05736	1.27957	1.73338	1.14164	1.24069	1.19924	1.2544	1.22724	1.23586	1.68536	1.58096		2.27553	0.629995	1.01403	0.980339	1.03244
44.67	2.34627	0.587088	1.12215	1.03348	1.29266	1.7374	1.14002	1.22858	1.1988	1.26934	1.22446	1.23682	1.70409	1.57986		2.25987	0.629018	1.0096	0.974827	1.03572
45	2.39555	0.588109	1.15318	1.03107	1.37253	1.73715	1.14162	1.22606	1.20301	1.2673	1.23737	1.24002	1.69319	1.58096		2.27159	0.626088	1.01291	0.976138	1.04301
45.33	2.39499	0.591584	1.13658	1.04637	1.31396	1.75486	1.14039	1.21436	1.20257	1.26339	1.23927	1.23951	1.71302	1.58028		2.27967	0.626453	1.00417	0.978339	1.04701
45.67	2.32494	0.578543	1.13921	1.05362	1.35508	1.72326	1.13134	1.21667	1.1922	1.2501	1.22568	1.23289	1.66255	1.56957		2.27876	0.623291	1.01695	0.97392	1.02525
46	2.33813	0.578812	1.16205	1.04832	1.39299	1.73205	1.12827	1.20803	1.19262	1.27223	1.22958	1.2316	1.71753	1.56524		2.27607	0.621867	1.0088	0.972844	1.04783
46.33	2.3787	0.582394	1.18759	1.02614	1.33442	1.7419	1.14033	1.22565	1.20243	1.26011	1.23242	1.24524	1.72221	1.57924		2.2794	0.621586	1.00192	0.97392	1.03706
46.67	2.34198	0.583093	1.10645	1.04483	1.29715	1.747	1.14077	1.23396	1.202	1.26238	1.23934	1.24258	1.69191	1.57333		2.29041	0.622066	1.00642	0.974558	1.03203
47	2.34804	0.583612	1.18376	1.07279	1.27861	1.74745	1.13618	1.21497	1.20697	1.25839	1.23971	1.24938	1.70426	1.58383		2.29297	0.619219	1.01013	0.972912	1.02104
47.33	2.35107	0.582502	1.18143	1.08364	1.36246	1.75507	1.14103	1.23096	1.20202	1.26308	1.23964	1.2429	1.69719	1.57534		2.29358	0.620543	1.0147	0.972895	1.04363
47.67	2.35302	0.580585	1.17677	1.08162	1.37105	1.76174	1.13903	1.22729	1.20574	1.27301	1.24377	1.25266	1.70809	1.57798		2.29378	0.617961	1.01357	0.971567	1.05738
48	2.35865	0.581767	1.13733	1.05063	1.33667	1.75322	1.14077	1.24131	1.20654	1.26683	1.24025	1.25038	1.71949	1.58081		2.3089	0.614882	1.00523	0.972643	1.02381
48.33	2.34425	0.580406	1.1335	1.08925	1.29048	1.75815	1.13921	1.23688	1.20386	1.25815	1.24516	1.25165	1.70723	1.58355		2.32041	0.614269	1	0.971231	1.03418
48.67	2.35369	0.580675	1.13515	1.03971	1.30793	1.75428	1.13937	1.23266	1.20616	1.27426	1.24567	1.25051	1.70366	1.58248		2.29634	0.613541	1.00847	0.969164	1.0347
49	2.34553	0.578292	1.09714	1.03111	1.35906	1.75709	1.14035	1.23069	1.20778	1.27199	1.24337	1.25124	1.71251	1.58765		2.29843	0.612514	0.997816	0.969887	1.02638
49.33	2.35941	0.58071	1.12907	1.04628	1.36721	1.76017	1.1382	1.22266	1.20821	1.28193	1.24384	1.25253	1.69685	1.5837		2.30708	0.611819	1.00119	0.971467	1.02967
49.67	2.38002	0.579259	1.16821	1.06906	1.52649	1.75374	1.13914	1.2441	1.2085	1.26871	1.23995	1.25152	1.69013	1.58828		2.30937	0.609253	1.02072	0.969097	1.03059
50	2.33958	0.579242	1.14236	1.01793	1.55998	1.76543	1.13778	1.23858	1.20787	1.26973	1.24648	1.25043	1.70664	1.58621		2.3127	0.609237	1.01714	0.970223	1.05502
50.33	2.3632	0.577755	1.08624	1.01843	1.60168	1.76422	1.13807	1.2264	1.20862	1.27481	1.23137	1.25344	1.70383	1.58505		2.31967	0.607217	0.985702	0.968038	1.02073
50.67	2.32509	0.576572	1.17129	1.09917	1.53066	1.77646	1.14116	1.24328	1.20639	1.26128	1.23852	1.25316	1.728	1.58664		2.33045	0.60687	1.0051	0.966778	1.02443
51	2.36272	0.579044	1.12591	1.03065	1.44515	1.77582	1.13754	1.21899	1.207	1.27598	1.24682	1.25251	1.6954	1.58617		2.31954	0.604023	1.01609	0.969719	1.04055
51.33	2.4132	0.580209	1.12809	0.995995	1.54228	1.77624	1.13697	1.24076	1.20821	1.26973	1.24449	1.25334	1.71719	1.58419		2.32786	0.605347	1.01152	0.971282	1.01571
51.67	2.42757	0.578507	1.12298	1.03628	1.56871	1.76957	1.13651	1.23368	1.20896	1.27598	1.24449	1.25115	1.69779	1.59074		2.32543	0.603162	0.999603	0.969248	1.01252
52	2.40514	0.57994	1.14785	1.0254	1.58115	1.77603	1.13798	1.23716	1.20756	1.2745	1.25221	1.25373	1.70545	1.58672		2.33776	0.602135	1.00304	0.970021	1.01858
52.33	2.39973	0.578901	1.12719	1.04199	1.54696	1.78682	1.13866	1.24382	1.20876	1.2659	1.23354	1.25027	1.71889	1.58717		2.33291	0.601622	1.00318	0.968963	1.03008
52.67	2.39624	0.579994	1.09857	0.988672	1.53317	1.77507	1.13577	1.25138	1.21014	1.27794	1.25241	1.25369	1.75115	1.58647		2.35018	0.599553	1.00755	0.969265	1.03285
53	2.64421	0.580352	1.12073	0.986855	1.51039	1.78141	1.13526	1.23314	1.20802	1.27286	1.25516	1.25368	1.7103	1.59333		2.34567	0.600116	0.989475	0.967282	1.0233
53.33	2.41943	0.579761	1.10427	0.987671	1.6523	1.78358	1.13766	1.23525	1.21227	1.28099	1.25882	1.25128	1.72613	1.59287		2.359	0.59851	0.999206	0.965803	1.01314
53.67	2.4065	0.578937	1.41394	1.00111	1.70112	1.78401	1.13537	1.24369	1.21063	1.27551	1.24706	1.25537	1.74638	1.5961		2.36466	0.599205	0.997485	0.962712	1.01396
54	2.42629	0.577056	1.13455	1.02336	1.29702	1.77766	1.13145	1.2445	1.20838	1.28091	1.25113	1.25742	1.72698	1.59549		2.3386	0.597037	0.999868	0.966341	1.01581
54.33	2.41374	0.578794	1.05777	0.982034	1.56293	1.78494	1.13318	1.23089	1.20785	1.27747	1.24289	1.24997	1.71685	1.58719		2.3556	0.595514	0.993645	0.966879	1.01478
54.67	2.40319	0.575999	1.09999	0.998702	1.59687	1.78996	1.13342	1.23838	1.20959	1.25244	1.24889	1.25226	1.72332	1.59224		2.37176	0.597202	0.999007	0.964291	1.01971
55	2.41768	0.576931	1.07911	1.00642	1.70676	1.78491	1.13502	1.23471	1.21055	1.28028	1.25058	1.25611	1.7566	1.59574		2.34816	0.592137	0.995631	0.961434	1.02176
55.33	2.40607	0.573957	1.18226	1.08401	1.48781	1.7941	1.13555	1.24192	1.21253	1.29421	1.24598	1.26103	1.74	1.60601		2.36163	0.591392	1.01708	0.964896	1.01252
55.67	2.42023	0.576734	1.13658	1.06333	1.64979	1.78044	1.13605	1.23627	1.21166	1.28638	1.2332	1.2583	1.7337	1.60035		2.37675	0.592518	1.00463	0.968307	1.02576
56	2.44645	0.578901	1.29344	1.32019	1.73011	1.8012	1.1357	1.24464	1.21524	1.27919	1.25001	1.26123	1.72136	1.60301		2.36651	0.592087	1.00265	0.962275	1.02125
56.33	2.37814	0.571718	1.02967	0.981701	1.47774	1.78875	1.13105	1.21763	1.20896	1.27332	1.23812	1.25104	1.70783	1.5924		2.35863	0.589637	1.00106	0.961266	1.03819
56.67	2.41384	0.574441	1.0921	1.01882	1.89069	1.80694	1.13206	1.22525	1.21082	1.28607	1.25157	1.25563	1.68936	1.59422		2.36927	0.590945	0.984643	0.964056	1.02813
57	2.55065	0.572542	1.10968	1.02725	1.8105	1.79827	1.13099	1.22361	1.20814	1.27067	1.24696	1.25316	1.66119	1.58972		2.36991	0.589472	1.01622	0.963064	1.03121
57.33	2.33629	0.572918	1.06243	1.02694	1.73576	1.80537	1.13349	1.24872	1.21138	1.28732	1.25716	1.25537	1.67787	1.59612		2.38237	0.586327	1.00424	0.960527	1.02884
57.67	2.37814	0.571234	1.01525	0.978586	1.85624	1.79253	1.13276	1.2379	1.20901	1.26582	1.24933	1.25559	1.69626	1.60244		2.38614	0.584721	0.988217	0.963014	1.02299
58	2.38697	0.573527	1.0891	1.00332	1.7076	1.79926	1.13143	1.23103	1.21341	1.28224	1.25224	1.25649	1.7257	1.60654		2.39392	0.584854	0.988085	0.961502	1.02002
58.33	2.58546	0.564642	0.984599	0.967165	1.9064	1.7915	1.12452	1.24008	1.20458	1.27583	1.23846	1.25132	1.63966	1.57808		2.38291	0.585466	0.994771	0.961922	1.02186
58.67	2.41508	0.571342	1.1196	1.01798	1.65108	1.82817	1.13761	1.246	1.21844	1.28459	1.26227	1.26565	1.67821	1.6062		2.39594	0.584456	0.998544	0.96177	1.0234
59	2.42781	0.573455	1.15356	0.983091	1.64813	1.81851	1.13614	1.25805	1.21984	1.28302	1.2599	1.26631	1.71472	1.60594		2.38227	0.581824	1.00854	0.960863	1.02628
59.33	2.43355	0.573455	1.061	1.00864	1.61015	1.8189	1.13542	1.25764	1.22131	1.3007	1.26908	1.27145	1.79123	1.61496		2.39688	0.580516	1.00318	0.959989	1.0156
59.67	2.49459	0.572596	1.05041	0.988968	1.89742	1.82633	1.13737	1.25587	1.21759	1.29804	1.26885	1.26869	1.78613	1.60578		2.40048	0.579589	0.992123	0.957889	1.01837
