# Supplementary material for: Real-time monitoring of peptidoglycan synthesis by membrane-reconstituted penicillin-binding proteins
Source: eLife. 2021 Feb 24;10:e61525. doi: 10.7554/eLife.61525 (PMC7943195; doi:10.7554/eLife.61525)
Supplement: Figure 3—figure supplement 3—source data 1. [file elife-61525-fig3-figsupp3-data1.xlsx]

## Sheet: Fig3-fig sup 3 panel A
time (min)	LUVs	LUVs + Moe
0	0.412358	0.402534
0.33	0.407978	0.404516
0.67	0.405477	0.410156
1	0.411505	0.410473
1.33	0.402467	0.401179
1.67	0.410616	0.418354
2	0.404187	0.411265
2.33	0.409091	0.401293
2.67	0.40849	0.410758
3	0.405257	0.400943
3.33	0.408916	0.407867
3.67	0.407778	0.407403
4	0.414132	0.411738
4.33	0.410137	0.407456
4.67	0.412695	0.409942
5	0.410328	0.406152
5.33	0.409823	0.400314
5.67	0.404074	0.401746
6	0.415276	0.407454
6.33	0.406989	0.400979
6.67	0.410867	0.403903
7	0.408537	0.405986
7.33	0.408406	0.405454
7.67	0.410397	0.410068
8	0.414316	0.405277
8.33	0.405168	0.401342
8.67	0.409836	0.409177
9	0.404608	0.410267
9.33	0.414143	0.411063
9.67	0.414626	0.410646
10	0.404586	0.413417
10.33	0.410077	0.404928
10.67	0.406476	0.402991
11	0.416914	0.407139
11.33	0.411718	0.421419
11.67	0.41252	0.407939
12	0.410556	0.406458
12.33	0.410034	0.41189
12.67	0.410484	0.413398
13	0.407151	0.407893
13.33	0.41361	0.413667
13.67	0.416405	0.415403
14	0.416705	0.424336
14.33	0.410734	0.413217
14.67	0.41297	0.40952
15	0.405059	0.413165
15.33	0.401807	0.403799
15.67	0.407652	0.406631
16	0.411549	0.402421
16.33	0.409039	0.411757
16.67	0.41127	0.412006
17	0.416337	0.410828
17.33	0.412755	0.412327
17.67	0.408818	0.405357
18	0.40761	0.407164
18.33	0.409835	0.415578
18.67	0.413789	0.412734
19	0.410301	0.40776
19.33	0.40386	0.415077
19.67	0.409161	0.410928
20	0.409278	0.40395
20.33	0.409187	0.409157
20.67	0.407727	0.409805
21	0.409368	0.409343
21.33	0.418136	0.407346
21.67	0.407745	0.404984
22	0.408259	0.404987
22.33	0.4075	0.405887
22.67	0.408404	0.417575
23	0.401612	0.428084
23.33	0.407713	0.425539
23.67	0.406736	0.41433
24	0.407898	0.412563
24.33	0.402733	0.408412
24.67	0.406064	0.403164
25	0.404534	0.410641
25.33	0.406339	0.410264
25.67	0.405979	0.414396
26	0.397726	0.41658
26.33	0.404913	0.406133
26.67	0.405278	0.412738
27	0.410131	0.408739
27.33	0.407424	0.41509
27.67	0.412513	0.409407
28	0.406143	0.409265
28.33	0.405014	0.413286
28.67	0.403868	0.417915
29	0.411002	0.412104
29.33	0.417459	0.413631
29.67	0.413875	0.404146
30	0.418894	0.412317
30.33	0.418851	0.415332
30.67	0.41278	0.406859
31	0.409686	0.408642
31.33	0.408631	0.409284
31.67	0.4081	0.418634
32	0.412044	0.408873
32.33	0.406155	0.416303
32.67	0.408463	0.407947
33	0.406523	0.413104
33.33	0.406289	0.406243
33.67	0.40294	0.40713
34	0.406102	0.408389
34.33	0.402739	0.404991
34.67	0.400405	0.41152
35	0.403757	0.410529
35.33	0.403836	0.414545
35.67	0.41009	0.406144
36	0.403639	0.408854
36.33	0.408234	0.407733
36.67	0.407927	0.406722
37	0.407645	0.414398
37.33	0.405933	0.412201
37.67	0.403516	0.41292
38	0.402903	0.408874
38.33	0.401112	0.411435
38.67	0.404002	0.407746
39	0.405087	0.410395
39.33	0.408611	0.411419
39.67	0.401527	0.408265
40	0.40716	0.40949
40.33	0.407457	0.406319
40.67	0.403684	0.414313
41	0.402151	0.414336
41.33	0.408123	0.413841
41.67	0.403824	0.41174
42	0.401342	0.412752
42.33	0.403441	0.419092
42.67	0.403946	0.411416
43	0.407037	0.418416
43.33	0.405271	0.421416
43.67	0.400402	0.406783
44	0.40487	0.41296
44.33	0.40577	0.418624
44.67	0.400504	0.413504
45	0.405805	0.414251
45.33	0.406908	0.41556
45.67	0.399911	0.41481
46	0.403527	0.413418
46.33	0.405464	0.432291
46.67	0.406999	0.413836
47	0.403612	0.414424
47.33	0.406788	0.408336
47.67	0.400677	0.412936
48	0.403988	0.416014
48.33	0.404642	0.417811
48.67	0.40322	0.421223
49	0.398925	0.411507
49.33	0.408294	0.415475
49.67	0.402396	0.4196
50	0.407673	0.412333
50.33	0.410115	0.41022
50.67	0.402751	0.425074
51	0.40319	0.416707
51.33	0.408014	0.408651
51.67	0.401153	0.415164
52	0.400985	0.412825
52.33	0.409245	0.417025
52.67	0.401826	0.411636
53	0.404583	0.412478
53.33	0.397047	0.415506
53.67	0.407469	0.422381
54	0.403831	0.412466
54.33	0.405096	0.416729
54.67	0.397643	0.411408
55	0.399923	0.41108
55.33	0.404489	0.411777
55.67	0.40159	0.412221
56	0.4127	0.414283
56.33	0.403157	0.414717
56.67	0.404455	0.412245
57	0.403276	0.413702
57.33	0.402169	0.410957
57.67	0.399383	0.411765
58	0.402087	0.429967
58.33	0.403913	0.414656
58.67	0.403371	0.419046
59	0.403316	0.422986
59.33	0.402301	0.419077
59.67	0.400341	0.419999
60.25	0.403493	0.417427
60.58	0.402488	0.414715
60.92	0.40152	0.419285
61.25	0.402577	0.422416
61.58	0.406682	0.414227
61.92	0.402834	0.421533
62.25	0.404555	0.424998
62.58	0.39978	0.413658
62.92	0.402485	0.412664
63.25	0.401843	0.421955
63.58	0.396841	0.412135
63.92	0.400439	0.41656
64.25	0.401207	0.412423
64.58	0.404505	0.414065
64.92	0.400197	0.411812
65.25	0.403971	0.414312
65.58	0.401007	0.414326
65.92	0.407081	0.410505
66.25	0.399617	0.413916
66.58	0.402774	0.414382
66.92	0.400634	0.413564
67.25	0.402707	0.411887
67.58	0.401237	0.41601
67.92	0.401191	0.411583
68.25	0.404876	0.410077
68.58	0.406156	0.412061
68.92	0.401368	0.417601
69.25	0.401929	0.415149
69.58	0.402694	0.413274
69.92	0.400076	0.411571
70.25	0.399641	0.417504
70.58	0.396561	0.414785
70.92	0.400163	0.416471
71.25	0.405768	0.419689
71.58	0.399346	0.411315
71.92	0.403201	0.41284
72.25	0.41396	0.411196
72.58	0.407333	0.413234
72.92	0.405472	0.411267
73.25	0.399695	0.409425
73.58	0.398085	0.414985
73.92	0.400959	0.412071
74.25	0.39915	0.416672
74.58	0.399891	0.414809
74.92	0.407709	0.420336
75.25	0.399457	0.42165
75.58	0.402687	0.410922
75.92	0.396921	0.412145
76.25	0.400391	0.418423
76.58	0.396143	0.409714
76.92	0.402818	0.420083
77.25	0.400834	0.413653
77.58	0.400076	0.416639
77.92	0.40142	0.414472
78.25	0.401105	0.416645
78.58	0.400498	0.405964
78.92	0.39585	0.41444
79.25	0.400966	0.419969
79.58	0.404631	0.418478
79.92	0.400671	0.415245
80.25	0.400844	0.415942
80.58	0.401446	0.413713
80.92	0.40391	0.413373
81.25	0.402136	0.416518
81.58	0.398461	0.409211
81.92	0.403715	0.421206
82.25	0.398045	0.410102
82.58	0.401513	0.413519
82.92	0.400759	0.414335
83.25	0.398529	0.414878
83.58	0.39618	0.415481
83.92	0.396952	0.411877
84.25	0.39847	0.411262
84.58	0.400929	0.414818
84.92	0.402435	0.414787
85.25	0.399589	0.414657
85.58	0.40508	0.411021
85.92	0.39987	0.41166
86.25	0.398889	0.412566
86.58	0.402686	0.408719
86.92	0.402908	0.410228
87.25	0.400885	0.41385
87.58	0.398081	0.410692
87.92	0.394064	0.411366
88.25	0.401251	0.416639
88.58	0.404674	0.417552
88.92	0.396294	0.413347
89.25	0.405596	0.412945
89.58	0.403702	0.412949
89.92	0.397721	0.420112
90.25
90.58
90.92
91.25
