# Supplementary material for: Real-time monitoring of peptidoglycan synthesis by membrane-reconstituted penicillin-binding proteins
Source: eLife. 2021 Feb 24;10:e61525. doi: 10.7554/eLife.61525 (PMC7943195; doi:10.7554/eLife.61525)
Supplement: Figure 3—figure supplement 4—source data 1. [file elife-61525-fig3-figsupp4-data1.xlsx]

## Sheet: Figure 3-figure supplement 4A
	Fluorescence intensity at 680 nm												Fluorescence intensity at 590 nm
	Atto550 + Atto647n				Atto550				Atto647n				Atto550 + Atto647n				Atto550
time (min)	PBP1B	+Amp	+Moe	only labelled	PBP1B	+Amp	+Moe	only labelled	PBP1B	+Amp	+Moe	only labelled	PBP1B	+Amp	+Moe	only labelled	PBP1B	+Amp	+Moe	only labelled
0	1	1	1	1	1	1	1	1	1	1	1	1	1	1	1	1	1	1	1	1
0.33	0.984425	0.983534	0.983464	1.00483	1.0067	1.00342	0.967196	1.02227	0.961914	1.01152	0.99252	0.968704	0.990004	0.991976	0.997795	1.0075	0.99643	0.99437	0.980861	0.993118
0.67	0.965212	0.965386	0.970583	1.00101	1.02211	1.01218	0.956966	1.01836	0.965376	1.0119	0.961626	0.972386	0.974422	0.972811	0.98064	1.00073	0.999518	0.996102	0.974658	0.991619
1	0.970528	0.926788	0.972661	1.00504	1.01876	1.01256	0.983774	0.997656	0.954989	1.01267	0.983089	0.958027	0.973734	0.95162	0.983813	1.00479	0.997877	0.992692	0.976196	0.988122
1.33	0.960269	0.923424	0.951554	1.00201	1.02513	1.00304	0.974956	0.99375	0.936733	1.01229	0.968455	0.927835	0.961552	0.939389	0.967195	0.994222	0.990785	0.989714	0.965433	0.980518
1.67	0.951408	0.92847	0.94931	0.977538	1.07437	1.01256	0.974603	1.00664	0.906201	1.0073	0.960976	0.926362	0.957667	0.940675	0.966012	0.990384	0.99725	0.993395	0.965062	0.987123
2	0.947398	0.923424	0.938009	0.982272	1.04724	1.01598	0.953792	1.00937	0.847655	1.02035	0.961626	0.944404	0.953175	0.938922	0.963377	0.991548	0.983018	0.9784	0.953186	0.968308
2.33	0.951781	0.928824	0.939588	0.987006	1.00603	1.00951	0.96649	1.01797	0.844507	1.00384	0.929756	0.925994	0.957586	0.948543	0.97381	0.994524	0.99122	0.990526	0.957481	0.980685
2.67	0.936019	0.917936	0.924796	0.984488	0.99732	1.02473	0.95097	1.01367	0.830973	1.00269	0.95122	0.909426	0.946254	0.938415	0.960097	0.999353	0.981137	0.980294	0.947248	0.970195
3	0.931916	0.920591	0.911833	0.975624	0.999665	1.01636	0.946384	1.00898	0.836009	1.01728	0.950244	0.923049	0.943179	0.938493	0.95687	0.986374	0.97665	0.979266	0.946824	0.968252
3.33	0.941709	0.922096	0.916736	0.969682	1.02245	1.01979	0.95485	1.025	0.851747	1.02074	0.947967	0.905744	0.950463	0.944843	0.966012	0.985037	0.981233	0.990743	0.958435	0.97741
3.67	0.932848	0.922805	0.908094	0.982776	1.03819	1.02854	0.977778	1.01172	0.835694	1.03379	0.941789	0.942931	0.947995	0.946868	0.963915	0.995041	0.982053	0.992475	0.959124	0.978076
4	0.926973	0.932808	0.929948	0.980459	1.04925	1.02397	0.96649	1.02422	0.832232	1.00192	0.921301	0.904271	0.94674	0.941064	0.969454	0.993359	0.979689	0.989985	0.95711	0.975357
4.33	0.920257	0.910499	0.893635	0.976128	1.04925	1.03044	0.965432	1.02266	0.833805	1.02343	0.926504	0.902062	0.93387	0.931482	0.952998	0.992583	0.983115	0.990472	0.95589	0.976023
4.67	0.927159	0.918732	0.896709	0.971898	1.02211	1.02017	0.958025	1.02891	0.833491	1.00653	0.923577	0.89838	0.942329	0.941259	0.96327	0.988185	0.969848	0.994695	0.959442	0.978298
5	0.928185	0.910853	0.898787	0.969984	1.01474	1.03272	0.968254	1.01133	0.824992	1.01882	0.92	0.910162	0.940427	0.941532	0.965313	0.987323	0.967001	0.994262	0.961086	0.980296
5.33	0.917086	0.91227	0.88225	0.96666	1.02714	1.02169	0.961905	1.02266	0.833805	1.01767	0.926504	0.90243	0.929621	0.930391	0.955902	0.986417	0.968979	0.995398	0.959389	0.980518
5.67	0.92091	0.908375	0.885076	0.96394	1.01575	1.03044	0.967549	0.997656	0.836638	1.0096	0.923577	0.897644	0.928042	0.931365	0.955741	0.97581	0.960488	0.988361	0.949157	0.96914
6	0.923149	0.927231	0.885657	0.968876	1.02044	1.03463	0.956261	1.0125	0.836638	1.00154	0.924228	0.910162	0.935044	0.939662	0.965421	0.986891	0.96869	0.999946	0.96432	0.97408
6.33	0.925294	0.918732	0.92355	0.969581	1.00536	1.02702	0.965079	1.03203	0.848599	1.02727	0.931707	0.901325	0.935368	0.941726	0.990428	0.985469	0.96647	0.991663	0.962252	0.970805
6.67	0.922589	0.914749	0.893801	0.95699	1.00838	1.02968	0.965432	1.02578	0.837897	0.998464	0.91252	0.892857	0.934639	0.942389	0.964614	0.977362	0.965988	0.99621	0.962623	0.972803
7	0.909998	0.925195	0.880838	0.972099	1.02245	1.02093	0.958025	1.01445	0.832861	1.00461	0.912846	0.897275	0.92699	0.933274	0.953428	0.989694	0.956918	0.982135	0.949687	0.959705
7.33	0.927439	0.915634	0.884494	0.982675	1.0258	1.01865	0.968254	1.01602	0.84136	1.0096	0.907967	0.848306	0.93209	0.941337	0.969293	0.992325	0.967484	0.992583	0.962464	0.963368
7.67	0.918765	0.919175	0.882583	0.965048	1.02178	1.05784	0.973898	1.02188	0.833805	1.01613	0.916098	0.854197	0.934154	0.9457	0.959183	0.988444	0.95962	0.993828	0.961245	0.959483
8	0.916527	0.917581	0.889314	0.962228	1.01843	1.03387	0.979894	1.00391	0.831602	1.03034	0.903089	0.862297	0.933101	0.939078	0.964614	0.989608	0.962129	0.992367	0.959972	0.955375
8.33	0.919418	0.916873	0.869121	0.961624	1.0124	1.04033	0.962257	1.01406	0.858042	1.01459	0.915772	0.857879	0.932778	0.937831	0.962732	0.986891	0.957449	0.995994	0.961245	0.95482
8.67	0.918392	0.932277	0.876766	0.971092	0.996315	1.04871	0.988713	1.00313	0.834435	1.00499	0.896911	0.842415	0.929702	0.943791	0.962087	0.989651	0.96483	1.00119	0.966759	0.957929
9	0.914661	0.919795	0.873525	0.964847	1.01072	1.06126	0.959788	1.01758	0.852062	1.02919	0.896911	0.843888	0.928771	0.941337	0.962409	0.987969	0.95851	0.995777	0.962411	0.953988
9.33	0.921377	0.920503	0.867708	0.959911	0.998995	1.04985	0.973898	1.00977	0.839156	1.01306	0.904065	0.842415	0.925897	0.940246	0.961656	0.976111	0.960295	0.998538	0.964426	0.956708
9.67	0.934434	0.916431	0.874688	0.960214	0.99866	1.05403	0.983069	0.987109	0.824363	0.955837	0.902439	0.832474	0.976203	0.941337	0.962302	0.988401	0.958365	0.998592	0.962517	0.957318
10	0.950476	0.925726	0.874273	0.959206	0.999665	1.05822	0.977425	1.01719	0.842934	0.973118	0.85561	0.833211	0.9639	0.945388	0.973057	0.986158	0.960295	0.996914	0.960927	0.96087
10.33	0.928465	0.925106	0.867542	0.955983	0.980905	1.04566	0.965432	1.00117	0.828769	0.96275	0.865041	0.827688	0.943138	0.941415	0.965636	0.97706	0.948717	0.986683	0.954088	0.950436
10.67	0.934527	0.922096	0.867625	0.971998	0.972864	1.04909	0.97037	1.01602	0.843563	0.951229	0.861138	0.840574	0.946052	0.94531	0.969185	0.989134	0.958221	1.00005	0.964002	0.961647
11	0.925947	0.919529	0.854329	0.970689	0.98191	1.06393	0.973545	1.01328	0.840415	0.956989	0.853333	0.846097	0.930835	0.939974	0.962517	0.987193	0.955471	0.999134	0.965168	0.964089
11.33	0.917739	0.915634	0.854994	0.96394	1.00436	1.03577	0.986243	1.01367	0.841675	0.949309	0.867967	0.82327	0.926747	0.936896	0.965044	0.98715	0.955423	0.997131	0.967289	0.9642
11.67	0.928838	0.940953	0.863719	0.966056	0.989615	1.05289	0.986243	1.01719	0.829084	0.941628	0.853333	0.838733	0.935813	0.944064	0.974133	0.989306	0.954313	0.99908	0.964797	0.965699
12	0.910091	0.916342	0.863387	0.954774	1.00771	1.04718	0.971076	1.04102	0.819326	0.947005	0.850732	0.833579	0.924683	0.940207	0.972466	0.984735	0.960729	1.00612	0.970205	0.972026
12.33	0.916993	0.934667	0.854412	0.967768	0.994305	1.06697	0.982716	1.02891	0.819326	0.941628	0.849431	0.82511	0.927476	0.937013	0.972896	0.986935	0.95576	1.00525	0.970205	0.970861
12.67	0.914382	0.915014	0.858152	0.954472	1.00034	1.04795	0.983069	1.01094	0.837583	0.949309	0.86439	0.821797	0.928042	0.938299	0.978596	0.974085	0.950502	1.00265	0.965592	0.967142
13	0.920257	0.920237	0.867625	0.966257	1.00804	1.05822	0.97672	1.03594	0.835065	0.956221	0.857236	0.83137	0.926464	0.937325	0.980102	0.988487	0.949682	1.00195	0.966334	0.967642
13.33	0.930144	0.92369	0.860562	0.967969	1.00369	1.03881	0.977425	1.02812	0.839471	0.944316	0.857561	0.814065	0.92869	0.940402	0.984297	0.991807	0.941046	0.990472	0.95711	0.957984
13.67	0.930423	0.931569	0.860229	0.95276	0.984255	1.06279	0.973545	1.04648	0.821845	0.926267	0.851382	0.813697	0.929378	0.939818	0.984888	0.973395	0.954072	1.00774	0.969197	0.972692
14	0.931916	0.924221	0.861725	0.949335	1.00938	1.05784	0.981658	1.01211	0.846711	0.963518	0.872846	0.832842	0.934437	0.938182	0.988868	0.971325	0.948958	1.00336	0.966387	0.966754
14.33	0.938165	0.926257	0.862722	0.957494	1.00737	1.04642	0.9806	1.01992	0.834435	0.948157	0.86439	0.821797	0.93897	0.937714	0.991503	0.983356	0.948861	1.00298	0.966175	0.968696
14.67	0.943014	0.922627	0.853748	0.954976	0.998995	1.0274	0.988713	1.02305	0.838527	0.939708	0.845854	0.828424	0.932697	0.93526	0.991127	0.985339	0.94862	1.00265	0.967819	0.969196
15	0.931356	0.91767	0.857155	0.954976	1.00302	1.06659	0.98836	1.02578	0.83412	0.9447	0.849106	0.828056	0.934518	0.934014	0.989728	0.982838	0.948475	1.00206	0.966334	0.968807
15.33	0.929398	0.928824	0.858567	0.963135	1.00972	1.04338	0.985891	1.02305	0.823418	0.952381	0.853008	0.842784	0.934518	0.936234	0.995644	0.983528	0.949489	1.00227	0.965115	0.967808
15.67	0.937512	0.9375	0.855327	0.962933	1.02714	1.04718	1.0067	1.02539	0.839156	0.950845	0.869268	0.807806	0.935691	0.936857	0.993977	0.981976	0.951129	1.00715	0.968667	0.968585
16	0.949636	0.933959	0.870949	0.965149	1.02747	1.04871	0.982363	1.01797	0.817123	0.942396	0.854959	0.820692	0.941681	0.938337	1.00484	0.984692	0.947559	1.00287	0.967024	0.969196
16.33	0.946372	0.937323	0.866711	0.961221	0.996985	1.05251	0.982011	1.01406	0.838527	0.950077	0.837073	0.824374	0.935853	0.933897	0.997741	0.988056	0.943892	1.00401	0.970205	0.968197
16.67	0.952341	0.926434	0.859232	0.963336	1.01809	1.04871	0.986596	1.03555	0.845137	0.941628	0.842276	0.805965	0.942288	0.93674	1.01022	0.98659	0.947848	1.00455	0.97047	0.972082
17	0.952807	0.926877	0.864218	0.96948	1.0067	1.06202	0.978131	1.02969	0.848599	0.961598	0.852033	0.837261	0.934639	0.931871	1.00339	0.984908	0.946063	1.00476	0.971265	0.972637
17.33	0.948797	0.942458	0.853665	0.946414	1.03618	1.04756	0.983774	1.0293	0.84073	0.96275	0.855285	0.846834	0.933587	0.93265	1.00301	0.971886	0.946883	1.00428	0.96925	0.973247
17.67	0.948144	0.927762	0.87178	0.959307	1.01642	1.06659	0.993651	1.025	0.850173	0.940092	0.865366	0.833579	0.937917	0.929145	1.00774	0.981458	0.942445	1.00558	0.972378	0.970361
18	0.946092	0.928116	0.863969	0.945508	1.01843	1.08942	0.992593	1.05313	0.824677	0.93894	0.847154	0.828056	0.935368	0.929612	1.00737	0.972058	0.949585	1.015	0.973227	0.979519
18.33	0.957098	0.92006	0.866046	0.960214	0.99397	1.06963	0.977425	1.03359	0.835065	0.945084	0.859512	0.849043	0.935327	0.929456	1.01076	0.982493	0.945919	1.01121	0.97328	0.972859
18.67	0.944786	0.930064	0.856739	0.953263	0.994305	1.06507	0.982716	1.04336	0.830028	0.958141	0.853333	0.831001	0.930592	0.929612	1.00328	0.985382	0.945436	1.01326	0.973121	0.978298
19	0.94889	0.923778	0.857321	0.960214	0.977554	1.05708	0.984832	1.0293	0.83475	0.953149	0.845528	0.833211	0.93209	0.929924	1.00667	0.971196	0.939164	1.00893	0.970152	0.975634
19.33	0.937512	0.913863	0.86131	0.953666	0.98057	1.06202	0.973192	1.03672	0.846081	0.93318	0.848455	0.828424	0.935125	0.927781	1.00828	0.981458	0.93627	1.00547	0.97047	0.972082
19.67	0.953833	0.923424	0.857404	0.935939	0.996985	1.05974	0.992945	1.01797	0.832232	0.9447	0.841626	0.846097	0.933385	0.927509	1.00828	0.97236	0.937331	1.00752	0.969356	0.97458
20	0.953367	0.928559	0.84951	0.957897	0.979229	1.05213	0.984832	1.0457	0.842934	0.961598	0.837724	0.839102	0.930349	0.923886	1.00333	0.982062	0.938103	1.00639	0.970046	0.974524
20.33	0.947771	0.948123	0.853498	0.954371	0.99263	1.06925	0.994004	1.02422	0.839471	0.96851	0.846179	0.835788	0.930187	0.928716	1.01162	0.983312	0.937621	1.00514	0.969993	0.974358
20.67	0.944507	0.932365	0.844773	0.958602	0.966499	1.06355	0.992945	1.03594	0.835694	0.953149	0.841951	0.83137	0.920798	0.916758	1.00151	0.989867	0.943555	1.0111	0.97381	0.976023
21	0.95346	0.945467	0.852667	0.962228	0.988275	1.06963	0.974603	1.02852	0.840415	0.946621	0.848455	0.830265	0.928933	0.926301	1.01522	0.981372	0.936607	1.00985	0.966175	0.974358
21.33	0.957284	0.927319	0.858401	0.959508	1.01106	1.07192	0.986243	1.02695	0.836953	0.943932	0.836098	0.841679	0.930673	0.926301	1.01726	0.98728	0.935353	1.0079	0.965963	0.976245
21.67	0.963999	0.937057	0.84602	0.956789	1.00503	1.04718	0.972487	1.01875	0.84073	0.941628	0.843577	0.846834	0.928569	0.924977	1.01463	0.981803	0.931059	1.00114	0.966175	0.972137
22	0.968196	0.931657	0.850756	0.95699	1.00804	1.05822	0.975309	1.02031	0.826251	0.960445	0.843902	0.826583	0.926262	0.927119	1.01721	0.982407	0.934485	1.00298	0.966706	0.971471
22.33	0.966704	0.935729	0.848014	0.955379	0.982915	1.05936	0.973898	1.03477	0.850173	0.947773	0.852358	0.829529	0.929985	0.924743	1.01662	0.983054	0.923147	0.995074	0.95695	0.958206
22.67	0.972486	0.938474	0.866295	0.963336	0.979229	1.05708	0.971076	1.03945	0.84734	0.954685	0.846504	0.846465	0.938363	0.931326	1.02689	0.983528	0.933713	1.0046	0.968561	0.974191
23	0.957657	0.927319	0.846851	0.955278	0.99732	1.06202	0.971429	1.02305	0.827195	0.936636	0.833171	0.83542	0.926262	0.924587	1.01882	0.981933	0.929853	1.00249	0.966334	0.972415
23.33	0.968196	0.931303	0.851753	0.965552	0.98861	1.06393	0.962963	1.03242	0.841675	0.955069	0.834146	0.841311	0.927881	0.924081	1.01995	0.983011	0.929371	1.00531	0.968561	0.97458
23.67	0.957937	0.942546	0.856905	0.950846	0.985595	1.04833	0.96649	1.0293	0.83475	0.9447	0.836098	0.848675	0.925209	0.923496	1.0278	0.971109	0.929419	1.00482	0.964744	0.972692
24	0.97174	0.925814	0.855991	0.952961	0.979229	1.06659	0.987654	1.03672	0.842619	0.963134	0.83935	0.824374	0.925209	0.923535	1.02264	0.983571	0.93545	1.00985	0.971954	0.977688
24.33	0.968196	0.926257	0.852003	0.960314	0.99129	1.06925	0.978483	1.03242	0.840101	0.951613	0.851057	0.858616	0.925412	0.920458	1.03275	0.985684	0.931735	1.00742	0.969568	0.974857
24.67	0.980414	0.936526	0.859481	0.961624	0.979564	1.0761	0.980952	1.04102	0.845452	0.956605	0.832846	0.844624	0.933587	0.926807	1.0306	0.984692	0.934292	1.01283	0.97259	0.979852
25	0.968849	0.930418	0.856905	0.954069	0.98794	1.06925	0.971076	1.02852	0.829084	0.945853	0.817561	0.849779	0.922174	0.920302	1.0249	0.982278	0.929419	1.00541	0.96819	0.9768
25.33	0.97715	0.928116	0.853083	0.958098	0.98057	1.04795	0.977072	1.02578	0.842304	0.956989	0.840325	0.856775	0.9278	0.918355	1.03001	0.982148	0.920301	1.00022	0.960609	0.966532
25.67	0.983865	0.93511	0.862556	0.95971	1.00603	1.06849	0.971429	1.05313	0.845137	0.948925	0.837073	0.832842	0.933708	0.92634	1.03721	0.983054	0.929612	1.00942	0.971212	0.977632
26	0.976217	0.928824	0.847598	0.956386	0.99732	1.07572	0.9806	1.05703	0.836324	0.93894	0.838699	0.834315	0.923469	0.918705	1.0292	0.982924	0.93188	1.01039	0.971848	0.97741
26.33	0.98116	0.930595	0.856407	0.9444	0.998325	1.09285	0.979541	1.02539	0.839156	0.953149	0.847805	0.837997	0.922741	0.916095	1.02694	0.972058	0.931059	1.00866	0.972855	0.978409
26.67	0.979202	0.930595	0.85192	0.957695	0.973869	1.04148	0.977072	1.0293	0.84734	0.953917	0.828293	0.840574	0.920596	0.915628	1.02802	0.977319	0.922665	1.00103	0.960397	0.969917
27	0.975378	0.931126	0.854496	0.963638	0.975879	1.06393	0.970018	1.02891	0.833491	0.963902	0.841626	0.851252	0.920839	0.916641	1.03103	0.981286	0.929323	1.01056	0.969462	0.977299
27.33	0.978642	0.937589	0.852086	0.968473	0.99263	1.06811	0.986596	1.02383	0.845452	0.971966	0.840976	0.860088	0.923307	0.916563	1.03372	0.979432	0.930239	1.01061	0.974711	0.979686
27.67	0.988901	0.944317	0.853582	0.956789	1.00067	1.06317	0.985891	1.03125	0.836324	0.961214	0.843577	0.845729	0.922296	0.914537	1.03587	0.980812	0.928165	1.00449	0.970788	0.979075
28	0.986383	0.939802	0.845189	0.956285	0.973869	1.06887	0.966138	1.01914	0.842619	0.970814	0.839024	0.840943	0.921648	0.914498	1.03426	0.980078	0.918034	1.00092	0.960927	0.967808
28.33	0.984704	0.935729	0.854246	0.962732	0.972864	1.07534	0.968959	1.0625	0.842619	0.960061	0.838374	0.837997	0.918694	0.913719	1.0392	0.982407	0.925318	1.0098	0.973068	0.981573
28.67	0.99571	0.934225	0.854329	0.956084	0.975879	1.07801	0.993298	1.03555	0.83412	0.971966	0.840976	0.852356	0.920474	0.91368	1.03721	0.985037	0.928165	1.01056	0.972537	0.979464
29	0.993751	0.937943	0.852003	0.962027	0.98928	1.05479	0.97672	1.04688	0.849544	0.959677	0.85561	0.859352	0.918572	0.912005	1.03904	0.984477	0.932555	1.01462	0.977521	0.98679
29.33	0.985824	0.936526	0.863055	0.952055	0.99129	1.07458	0.98448	1.03867	0.850488	0.950077	0.849106	0.836892	0.915334	0.909707	1.05324	0.968867	0.926959	1.00904	0.974181	0.978742
29.67	0.988062	0.937677	0.851255	0.955681	1.0134	1.05061	0.97284	1.04609	0.840101	0.958525	0.839675	0.872239	0.913028	0.91107	1.03963	0.981588	0.917599	1.00217	0.965115	0.972859
30	0.999347	0.950071	0.857404	0.949537	1.00637	1.08638	0.986596	1.03008	0.826881	0.953149	0.847154	0.855302	0.919786	0.916874	1.04453	0.970118	0.927441	1.01261	0.974234	0.983571
30.33	1.00037	0.945113	0.854329	0.957293	1.00268	1.06088	0.995414	1.04648	0.848914	0.965054	0.835122	0.864138	0.913837	0.912473	1.03953	0.97844	0.927007	1.01126	0.972962	0.982683
30.67	0.992819	0.93812	0.848263	0.94309	1.00838	1.07763	0.993651	1.0375	0.833176	0.951613	0.820488	0.851252	0.918087	0.910252	1.04189	0.968867	0.927489	1.01196	0.973863	0.980796
31	0.997015	0.94228	0.848263	0.948328	0.99598	1.07344	0.975661	1.02969	0.842619	0.980415	0.843902	0.848306	0.911287	0.908694	1.04001	0.978354	0.917985	0.999621	0.962623	0.972581
31.33	0.995803	0.943431	0.857903	0.957695	0.99531	1.06431	0.974603	1.04883	0.84797	0.950461	0.841626	0.865611	0.914161	0.910564	1.04286	0.982838	0.925463	1.01213	0.972272	0.978964
31.67	0.992445	0.941661	0.84951	0.959508	1.00838	1.06697	0.979189	1.04531	0.849544	0.957757	0.841951	0.854197	0.915011	0.908577	1.04808	0.98189	0.925753	1.00964	0.973704	0.981406
32	0.99972	0.9375	0.845604	0.962127	1.00034	1.06963	0.967196	1.04336	0.831917	0.950077	0.821463	0.839838	0.91319	0.902384	1.03931	0.984002	0.915959	1.00011	0.964055	0.969251
32.33	1.01138	0.94414	0.865215	0.958501	1.01508	1.07306	0.987654	1.04961	0.839786	0.961214	0.836748	0.842784	0.917641	0.91294	1.05501	0.979777	0.923823	1.0105	0.977097	0.982461
32.67	0.999161	0.948831	0.859731	0.947522	1.01776	1.08295	0.983422	1.03398	0.822474	0.979263	0.83935	0.852725	0.909507	0.906162	1.04668	0.97236	0.924691	1.01467	0.97768	0.988067
33	0.99142	0.927762	0.843111	0.955278	1	1.07382	0.99224	1.06445	0.83412	0.970814	0.846179	0.858616	0.898256	0.896969	1.0341	0.978914	0.925125	1.01316	0.977415	0.993728
33.33	1.00261	0.942015	0.852751	0.966358	0.99732	1.07078	0.980247	1.04336	0.835379	0.97427	0.816585	0.846465	0.907159	0.906045	1.04754	0.981545	0.917117	1.00422	0.967713	0.984126
33.67	1.00998	0.945202	0.856573	0.938356	1.00134	1.07344	1.00494	1.0543	0.836324	0.956605	0.825041	0.836524	0.908373	0.905929	1.05012	0.969902	0.924354	1.01045	0.989079	0.991508
34	1.0152	0.940687	0.864966	0.957293	0.986935	1.08181	1.01376	1.05391	0.84734	0.974654	0.838699	0.858616	0.907928	0.903903	1.05281	0.983011	0.929226	1.01819	1	0.996947
34.33	1.025	0.950425	0.8589	0.940068	0.9933	1.06697	0.996825	1.03906	0.853321	0.963902	0.842276	0.865243	0.91408	0.909434	1.06045	0.966711	0.918227	1.00298	0.983883	0.980241
34.67	1.02015	0.94228	0.858983	0.959609	1.00972	1.09361	0.999295	1.05469	0.849229	0.954685	0.838049	0.858984	0.9089	0.904487	1.05173	0.982536	0.923871	1.01272	0.995547	0.990731
35	1.01287	0.943608	0.855908	0.94994	1.0134	1.08638	1.01129	1.06523	0.842934	0.965822	0.826992	0.856038	0.905176	0.903514	1.04942	0.976284	0.925849	1.01234	0.996554	0.990897
35.33	1.01781	0.9429	0.846269	0.958904	1.01106	1.09779	1.00035	1.04922	0.846711	0.971582	0.835447	0.879234	0.903315	0.901566	1.0498	0.982321	0.925753	1.02209	0.993903	0.988955
35.67	1.00065	0.949894	0.84228	0.969984	1.00134	1.08828	1.02257	1.04961	0.848599	0.988863	0.836748	0.864875	0.900198	0.901839	1.0498	0.982364	0.928744	1.01754	1.00005	0.998224
36	1.00047	0.939625	0.843859	0.956386	1.00838	1.06469	1.01834	1.05664	0.833805	0.959293	0.843902	0.858984	0.889757	0.889802	1.03786	0.976327	0.926525	1.0144	0.99825	0.992341
36.33	1.01912	0.951222	0.847765	0.964847	0.99464	1.08714	1.02081	1.05547	0.863393	0.974654	0.828943	0.853829	0.899955	0.901761	1.05098	0.974473	0.924498	1.01435	0.995229	0.994838
36.67	1.01837	0.948389	0.844191	0.954976	1.01474	1.06317	1.0127	1.05273	0.844507	0.973118	0.852683	0.844624	0.899187	0.899618	1.05184	0.962658	0.92363	1.01278	0.998834	1.00572
37	1.02173	0.951222	0.851836	0.959508	1.00402	1.06849	1.0067	1.06367	0.830028	0.957757	0.826992	0.853093	0.904933	0.902189	1.05577	0.977578	0.923968	1.01824	0.996872	0.994672
37.33	1.02761	0.95193	0.846851	0.954472	1.0134	1.07839	1.01199	1.08828	0.837897	0.969662	0.824715	0.844256	0.898701	0.899073	1.05566	0.978354	0.924595	1.01738	0.99894	0.998668
37.67	1.0235	0.950248	0.859232	0.956185	0.996985	1.07154	1.01517	1.07148	0.846081	0.966974	0.831545	0.884021	0.89433	0.899034	1.05717	0.972964	0.927007	1.01543	0.999417	0.994894
38	1.03693	0.958658	0.860063	0.96253	0.963819	1.08257	1.01235	1.05625	0.838527	0.984639	0.835772	0.864507	0.901048	0.903864	1.06238	0.979345	0.922327	1.02404	0.995441	0.995449
38.33	1.03171	0.951753	0.856905	0.958199	0.968174	1.07648	1.01093	1.06172	0.835065	0.97619	0.827642	0.867084	0.895787	0.900826	1.06066	0.977664	0.921941	1.01808	0.996554	0.996281
38.67	1.03572	0.969016	0.859481	0.957897	0.970184	1.07991	1.00212	1.06953	0.850488	0.975422	0.842276	0.853829	0.901048	0.902812	1.06663	0.979345	0.921121	1.01424	0.99947	0.992174
39	1.03852	0.965917	0.851089	0.964243	0.971189	1.08257	1.01411	1.06797	0.840415	0.96659	0.839675	0.869293	0.898701	0.903747	1.06771	0.977319	0.922472	1.01738	0.998463	0.9995
39.33	1.025	0.956799	0.848762	0.952558	0.969514	1.08447	1.01305	1.06992	0.825936	0.953533	0.826341	0.854566	0.891699	0.895061	1.05614	0.972317	0.926428	1.01862	1.0026	0.998224
39.67	1.03003	0.952727	0.848679	0.962732	0.968174	1.07534	1.01305	1.07773	0.837897	0.988863	0.823089	0.872975	0.892711	0.880609	1.07002	0.983873	0.921555	1.01391	0.998622	0.995005
40	1.03274	0.960163	0.848263	0.967969	0.955109	1.07572	1.01728	1.06719	0.841989	0.993472	0.834797	0.885862	0.891942	0.896969	1.05846	0.985167	0.921459	1.01489	1.00011	1.00111
40.33	1.03302	0.958038	0.845189	0.959609	0.958459	1.0761	1.01728	1.05234	0.846711	0.968126	0.830244	0.850884	0.891618	0.897749	1.06271	0.975508	0.915814	1.00942	0.993214	0.988844
40.67	1.03721	0.950868	0.855576	0.962228	0.984925	1.08562	1.0134	1.0668	0.838842	0.963518	0.827642	0.872607	0.887531	0.894321	1.06222	0.979992	0.926525	1.02198	1.00541	1.00289
41	1.03115	0.956887	0.84926	0.944803	1.00938	1.07268	1.01693	1.04375	0.83412	0.961214	0.83122	0.862666	0.888785	0.895333	1.06023	0.969212	0.920639	1.017	1.00451	1.00305
41.33	1.04579	0.966802	0.84926	0.95145	1.01374	1.0723	1.01799	1.09141	0.834435	0.995776	0.826016	0.884021	0.893804	0.899852	1.06582	0.966021	0.926862	1.02544	1.00753	0.999611
41.67	1.04328	0.966537	0.859648	0.951652	0.99464	1.07344	1.01129	1.06875	0.844193	0.993472	0.855285	0.872607	0.892873	0.896229	1.06975	0.968005	0.92199	1.01851	1.00387	0.996836
42	1.0415	0.953523	0.845521	0.967667	0.990955	1.07458	1.02116	1.05156	0.842934	0.967742	0.837398	0.865611	0.887369	0.892879	1.06367	0.980984	0.919095	1.01635	1.0026	1.00222
42.33	1.04533	0.956445	0.858069	0.957998	0.961474	1.07078	1.00741	1.05039	0.831287	0.983487	0.829593	0.861193	0.888178	0.888867	1.06518	0.980941	0.917792	1.01749	1.00514	0.995837
42.67	1.05102	0.959809	0.853415	0.962027	0.967839	1.09855	1.00811	1.06797	0.836009	0.982335	0.844553	0.86377	0.88745	0.8921	1.06394	0.981933	0.921748	1.02306	1.00679	1.00683
43	1.04757	0.955648	0.84602	0.957192	0.951424	1.086	1.01623	1.06641	0.836638	0.968894	0.835447	0.866348	0.882715	0.889374	1.06582	0.979949	0.914657	1.01732	1.00382	0.998834
43.33	1.04402	0.966802	0.855908	0.968372	0.98258	1.08942	1.00705	1.06953	0.840101	0.983871	0.841951	0.863402	0.883079	0.8921	1.06771	0.979647	0.916104	1.01754	1.00323	1.00733
43.67	1.05307	0.968661	0.86347	0.958199	0.976884	1.08029	1.01693	1.07812	0.846081	0.980799	0.834472	0.859352	0.880448	0.890503	1.06846	0.979044	0.913595	1.01472	1.00191	1.00727
44	1.04495	0.965475	0.852751	0.955782	0.969514	1.07002	1.00917	1.05977	0.849544	0.975038	0.852683	0.882548	0.881217	0.887621	1.06668	0.980467	0.911907	1.0229	1.00302	1.00089
44.33	1.05512	0.96813	0.852252	0.965552	0.955779	1.08714	1.00494	1.06094	0.851117	0.981567	0.841626	0.877025	0.880691	0.888205	1.06841	0.979432	0.911231	1.01467	1.00095	1.00172
44.67	1.05932	0.961314	0.84361	0.963336	0.982915	1.08447	1.01164	1.0707	0.844193	0.984639	0.852683	0.868557	0.880044	0.886608	1.0783	0.98176	0.910025	1.01592	1.00376	1.01121
45	1.05391	0.964235	0.860312	0.955983	0.99799	1.0898	1.01587	1.07852	0.829399	0.961214	0.85561	0.848675	0.879963	0.889919	1.07233	0.968652	0.920687	1.02377	1.00732	1.00089
45.33	1.07359	0.969281	0.85516	0.964545	1.0124	1.0879	1.00353	1.07109	0.850488	0.988863	0.856911	0.861561	0.885831	0.890581	1.08126	0.981113	0.91181	1.01619	1.00599	1.00583
45.67	1.05167	0.967334	0.856656	0.957293	0.988945	1.08029	1.00882	1.07539	0.837583	1.00192	0.841951	0.863034	0.878587	0.887192	1.07373	0.976241	0.911858	1.01705	1.00551	0.999667
46	1.06855	0.960783	0.858983	0.970588	0.968509	1.09361	1.00564	1.05195	0.846396	0.977343	0.846179	0.856775	0.87632	0.886491	1.07351	0.97581	0.910073	1.01678	1.00345	1.00039
46.33	1.0512	0.964855	0.854662	0.964041	0.971189	1.07496	1.02363	1.07773	0.854265	0.97619	0.847154	0.866716	0.876118	0.886608	1.07782	0.976672	0.908288	1.01732	1.00482	0.996781
46.67	1.0582	0.968042	0.857072	0.958803	0.979899	1.06925	1.01446	1.08516	0.849858	0.975806	0.841626	0.875552	0.873366	0.884972	1.07534	0.974559	0.906262	1.0157	1.00482	0.998113
47	1.06836	0.966448	0.848429	0.955177	0.984255	1.08257	1.01728	1.08164	0.829714	0.991935	0.838699	0.879234	0.872718	0.884582	1.07378	0.974473	0.90385	1.01586	1.00371	0.997003
47.33	1.07648	0.970875	0.856158	0.960214	1.00168	1.07306	1.01834	1.08125	0.853636	0.969662	0.843902	0.85567	0.873852	0.884349	1.07502	0.977405	0.906937	1.01851	1.00604	0.999001
47.67	1.0692	0.968839	0.855825	0.958602	1.00637	1.08333	1.00917	1.07695	0.842304	0.978879	0.834146	0.869661	0.873852	0.883414	1.0776	0.977491	0.91345	1.01765	1.00679	0.999833
48	1.07816	0.975832	0.850922	0.957695	1.01709	1.07458	1.02328	1.05977	0.833176	0.980415	0.857561	0.858984	0.872516	0.878623	1.0755	0.97305	0.910749	1.01386	1.00493	0.999611
48.33	1.07144	0.979993	0.854412	0.946011	0.971189	1.09247	1.01058	1.06172	0.836953	0.985407	0.86439	0.878866	0.87717	0.882245	1.08255	0.971799	0.910459	1.01505	1.0062	1.00183
48.67	1.07993	0.967334	0.853	0.954371	1.00369	1.06126	1.00282	1.05898	0.837897	0.969278	0.862439	0.868925	0.871707	0.88131	1.07857	0.969212	0.903753	1.00985	0.993903	0.99173
49	1.08506	0.967157	0.853415	0.950544	0.98995	1.08181	1.01129	1.07383	0.826251	0.97427	0.845528	0.866716	0.869926	0.882946	1.07965	0.971498	0.913306	1.01851	1.00588	1.00533
49.33	1.08002	0.97176	0.853498	0.950141	0.986265	1.09665	1.02399	1.09414	0.851432	0.982335	0.83187	0.87592	0.866931	0.880882	1.07959	0.970247	0.915814	1.02442	1.01103	1.00472
49.67	1.07611	0.981852	0.849593	0.951148	0.974204	1.08181	1.0254	1.08047	0.839156	0.996544	0.845854	0.863402	0.866203	0.879402	1.08045	0.967531	0.911279	1.01667	1.0079	1.00233
50	1.07797	0.974947	0.85516	0.954371	0.99129	1.07648	1.01799	1.07617	0.831287	0.983487	0.844228	0.882548	0.866041	0.881739	1.07852	0.969988	0.911521	1.01738	1.00779	1.00205
50.33	1.07881	0.968839	0.852418	0.952961	0.983585	1.08067	1.01517	1.07344	0.836638	0.982719	0.862114	0.871134	0.866445	0.882245	1.07959	0.971972	0.910122	1.01987	1.00631	1.00472
50.67	1.07694	0.961402	0.839538	0.952256	0.974204	1.09741	1.03034	1.07695	0.842934	0.983103	0.853984	0.868189	0.860941	0.87461	1.0698	0.973654	0.918468	1.0255	1.01193	1.00683
51	1.08627	0.971494	0.849177	0.95971	0.985595	1.08562	1	1.06875	0.843878	0.983871	0.850081	0.87408	0.8677	0.882245	1.08766	0.975249	0.91345	1.02036	1.00705	1.00771
51.33	1.1122	0.986544	0.860894	0.951249	0.966834	1.08638	1.01481	1.07734	0.839156	0.982335	0.857236	0.866716	0.878789	0.886569	1.09212	0.968565	0.910942	1.02485	1.00912	1.00261
51.67	1.0775	0.965386	0.838208	0.966056	0.974204	1.08219	1.0067	1.08008	0.858986	1.00538	0.850407	0.88623	0.856732	0.87278	1.07061	0.981545	0.912679	1.02312	1.00753	1.00561
52	1.09644	0.989023	0.849842	0.963739	0.966834	1.09932	1.02681	1.08242	0.817438	0.994624	0.850732	0.881075	0.865838	0.879363	1.0854	0.97775	0.908385	1.02008	1.00663	1.00061
52.33	1.0859	0.977072	0.85192	0.964243	0.969514	1.08447	1.01093	1.06797	0.839471	0.997696	0.854634	0.87813	0.864462	0.883141	1.08965	0.977578	0.912727	1.02241	1.00954	1.01393
52.67	1.09364	0.97778	0.859648	0.96253	0.957454	1.07801	1.02222	1.08594	0.849858	0.99232	0.859187	0.884389	0.861953	0.882089	1.08744	0.975335	0.912148	1.01938	1.00976	1.0035
53	1.08916	0.978045	0.84336	0.949738	0.975209	1.09475	1.01305	1.09219	0.84797	0.981951	0.852358	0.871502	0.861022	0.880921	1.08518	0.96697	0.9162	1.0268	1.01341	1.01143
53.33	1.08515	0.987252	0.846186	0.948127	0.966499	1.06431	1.00917	1.08359	0.845766	0.993472	0.866341	0.898012	0.859808	0.877999	1.08427	0.965331	0.911328	1.02366	1.00891	1.02514
53.67	1.09243	0.988137	0.850673	0.962832	0.98459	1.11111	1.01129	1.0543	0.831287	0.988863	0.85561	0.884757	0.858594	0.87835	1.08588	0.973265	0.906455	1.02073	1.00689	1.00389
54	1.10772	0.990793	0.8589	0.953263	0.964154	1.08676	1.01905	1.09297	0.825307	0.986175	0.857561	0.872239	0.863167	0.883998	1.0939	0.963262	0.907661	1.02187	1.00816	1.01293
54.33	1.09205	0.993095	0.855659	0.949537	0.960469	1.08866	1.01834	1.08203	0.833176	0.96659	0.857236	0.872975	0.857582	0.880804	1.09083	0.962701	0.911858	1.02149	1.01029	1.00294
54.67	1.10082	0.980878	0.855991	0.960717	0.960134	1.07877	1.01587	1.08633	0.823733	0.970046	0.839024	0.861929	0.855721	0.87761	1.09481	0.973352	0.910025	1.02588	1.00965	1.00738
55	1.09718	0.99159	0.858484	0.96384	0.955109	1.07496	1.02116	1.10859	0.852691	0.998464	0.857236	0.874816	0.855194	0.878973	1.09175	0.976586	0.909543	1.02008	1.00689	1.01343
55.33	1.10231	0.989819	0.852917	0.967164	0.974204	1.08828	1.01164	1.11992	0.838842	0.987327	0.849106	0.864507	0.854952	0.881077	1.08895	0.977621	0.907758	1.02036	1.01023	1.02692
55.67	1.11117	0.990174	0.859149	0.956084	0.969179	1.09361	1.00741	1.10977	0.826251	0.993088	0.867317	0.867452	0.860537	0.884193	1.10374	0.968307	0.910363	1.02225	1.01002	1.01221
56	1.10474	0.979904	0.856158	0.971998	0.993635	1.09361	1.01764	1.08242	0.84734	0.979647	0.83935	0.87187	0.854264	0.877883	1.09664	0.982838	0.91345	1.02631	1.01113	1.05484
56.33	1.10893	0.986455	0.859897	0.968977	0.99397	1.086	1.006	1.11406	0.833176	0.986559	0.823415	0.876289	0.852038	0.876558	1.09927	0.976155	0.906986	1.01824	1.00859	1.04141
56.67	1.10203	0.986544	0.863886	0.96384	0.982915	1.08562	0.998942	1.09844	0.838527	0.989247	0.870894	0.89028	0.853333	0.873325	1.10013	1.00517	0.906117	1.01943	1.01129	1.04068
57	1.1094	0.986721	0.854994	0.960616	0.987605	1.09399	1.0328	1.0875	0.838527	0.99232	0.84878	0.879971	0.854547	0.87761	1.09992	0.977146	0.908867	1.03221	1.01129	1.00189
57.33	1.10035	0.981941	0.858983	0.957695	0.977219	1.07154	0.994004	1.04961	0.823418	0.990399	0.84	0.871134	0.851512	0.873637	1.09443	0.976586	0.901486	1.01094	0.998197	0.993118
57.67	1.10912	0.989908	0.855243	1.00332	0.979899	1.08333	1.01199	1.08789	0.846396	0.978879	0.865366	0.888439	0.850905	0.876558	1.09373	0.973481	0.904381	1.02252	1.00976	1.02142
58	1.11752	0.989908	0.856407	0.954774	1.00134	1.06811	1.01587	1.10352	0.844507	0.99424	0.853333	0.888071	0.848193	0.873091	1.09825	0.966711	0.903223	1.01023	1.00016	1.02248
58.33	1.13636	0.983623	0.858401	0.962631	0.983585	1.09551	1.02011	1.08047	0.852062	0.973118	0.854309	0.914948	0.85564	0.878389	1.10454	1.00431	0.912823	1.02907	1.0123	1.00788
58.67	1.12507	0.997256	0.867376	0.962329	1.00771	1.06659	1.02892	1.07891	0.830658	0.979263	0.850732	0.876289	0.856247	0.878467	1.10524	0.98521	0.90578	1.01906	1.01002	1.00433
59	1.12348	0.984419	0.860562	0.97502	1.00436	1.10008	0.998942	1.09102	0.840101	1.00192	0.863089	0.883284	0.849326	0.871299	1.10148	0.978224	0.908578	1.0183	1.00933	1.01682
59.33	1.11845	0.991678	0.849177	0.970689	1.01407	1.10388	1.01481	1.08047	0.831287	0.981951	0.859837	0.892489	0.844348	0.869897	1.09997	0.97706	0.907565	1.02988	1.0106	1.00239
59.67	1.11155	0.990262	0.855077	0.967466	1.02747	1.09094	1.01235	1.07148	0.853636	0.977343	0.859187	0.879234	0.843782	0.871144	1.09696	0.976931	0.907854	1.02203	1.00922	1.00183
60	1.12722	0.991856	0.851587	0.972502	0.98593	1.09513	1.0261	1.07969	0.832546	0.999616	0.862439	0.885493	0.843175	0.868495	1.10202	0.983226	0.909108	1.02084	1.0114	1.00611
60.33	1.14176	1.00124	0.865215	0.964545	0.972864	1.09437	1.01975	1.07148	0.842619	1.00077	0.861138	0.884021	0.847343	0.873013	1.10777	0.97499	0.904188	1.01792	1.01129	1.00244
60.67	1.12348	0.990705	0.862722	0.968977	0.975209	1.08866	1.02011	1.08398	0.837583	0.993856	0.863415	0.893594	0.839856	0.866703	1.10164	0.978871	0.905587	1.01786	1.01135	1.00433
61	1.12218	0.998141	0.856241	0.960516	0.980905	1.08067	1.01799	1.07812	0.837897	0.993472	0.862114	0.882548	0.839492	0.86569	1.10535	0.978526	0.907806	1.02128	1.01156	1.00228
61.33	1.11975	0.977337	0.846435	0.947824	1.00905	1.07344	1.02011	1.07148	0.826881	0.987711	0.85561	0.882916	0.832045	0.855407	1.08744	0.966582	0.908771	1.02019	1.01294	1.00405
61.67	1.13878	0.990793	0.859066	0.96253	0.99531	1.07877	1.01834	1.07852	0.832232	1.00653	0.877073	0.901694	0.845239	0.867833	1.11116	0.975465	0.905442	1.01884	1.01002	1.00583
62	1.13169	0.988314	0.856989	0.973308	0.999665	1.10122	1.01552	1.06797	0.835379	0.97427	0.858211	0.881443	0.840423	0.861873	1.10406	0.979	0.906503	1.01954	1.01097	1.00266
62.33	1.13104	0.980081	0.852335	0.969883	1.0067	1.08143	1.00882	1.07695	0.848599	0.991935	0.866992	0.886966	0.839815	0.858835	1.10971	1.01833	0.908723	1.01916	1.01219	1.00599
62.67	1.12292	0.981498	0.859481	0.974617	1.01273	1.08714	1.02399	1.08359	0.84073	0.987327	0.859837	0.879602	0.839087	0.85938	1.10643	0.981846	0.905828	1.01976	1.01511	1.00294
63	1.13449	0.990174	0.861393	0.979251	0.98593	1.09627	1.02575	1.08047	0.847655	0.985407	0.84878	0.89028	0.836092	0.858679	1.11111	0.982105	0.90578	1.0236	1.01527	1.00644
63.33	1.12628	0.992652	0.861227	0.967264	0.98325	1.07192	1.01481	1.07773	0.832232	0.983487	0.879024	0.901694	0.834514	0.856731	1.10637	0.968307	0.905442	1.01895	1.01659	1.00383
63.67	1.14475	1.01231	0.854412	0.971898	1.00737	1.07534	1.00741	1.07578	0.829399	0.991167	0.853008	0.905376	0.837549	0.859769	1.11046	0.981156	0.903802	1.01803	1.01527	1.00733
64	1.13645	0.984419	0.855742	0.954271	1.03049	1.09855	1.01869	1.07422	0.84797	0.981183	0.859837	0.877025	0.832288	0.856458	1.10987	0.968177	0.906262	1.01981	1.01617	1.00577
64.33	1.13878	0.98079	0.860728	0.962228	1.00637	1.07534	1.03139	1.05937	0.836638	0.977343	0.850081	0.877393	0.832976	0.857822	1.10492	0.977836	0.904718	1.02057	1.01681	1.00438
64.67	1.14316	0.990351	0.853332	0.962933	0.981575	1.08219	1.03316	1.07969	0.836953	0.985407	0.861789	0.892489	0.830102	0.860548	1.10729	0.978311	0.909205	1.02571	1.01893	1.01171
65	1.14522	0.996636	0.858983	0.958602	1.01072	1.09589	1.02928	1.06406	0.829399	0.987327	0.833171	0.88218	0.829698	0.859536	1.10799	0.976758	0.904477	1.01819	1.0185	1.00638
65.33	1.13785	0.999734	0.858235	0.961825	0.988275	1.10084	1.0328	1.08633	0.835379	0.981183	0.865691	0.893594	0.831317	0.8616	1.11718	0.981458	0.907034	1.01971	1.01665	1.00705
65.67	1.14139	0.992475	0.851587	0.967365	0.990955	1.09323	1.03422	1.09883	0.84797	1.0023	0.85626	0.879602	0.829091	0.859575	1.10917	0.977836	0.904911	1.02176	1.01935	1.00494
66	1.14354	1.00097	0.847931	0.952861	0.986935	1.06659	1.02963	1.08477	0.837583	0.991551	0.86439	0.889543	0.829172	0.862808	1.11008	0.972144	0.901824	1.0223	1.0176	1.00722
66.33	1.14354	1.00522	0.855077	0.964444	0.966834	1.09132	1.03668	1.07266	0.839156	0.993472	0.874472	0.901325	0.825812	0.859497	1.11379	0.978095	0.899556	1.02041	1.01617	1.00771
66.67	1.14102	1.00425	0.850839	0.968171	0.98526	1.09589	1.03422	1.09023	0.830973	1.00077	0.865691	0.881075	0.826743	0.858951	1.11186	0.976715	0.90467	1.02474	1.02168	1.00866
67	1.14251	0.999115	0.853997	0.976531	1.02479	1.09513	1.01376	1.08047	0.83475	0.971198	0.852683	0.891753	0.82561	0.857822	1.11272	0.977836	0.908433	1.01927	1.02031	1.01032
67.33	1.1496	1.00159	0.85192	0.973811	0.956449	1.07877	1.02575	1.07695	0.831602	0.991167	0.858537	0.892121	0.825165	0.857744	1.10949	0.981027	0.895793	1.0098	1.0061	0.998945
67.67	1.15837	0.999469	0.852335	0.977236	0.984925	1.08866	1.02822	1.09688	0.843248	0.988479	0.864715	0.895803	0.82217	0.859653	1.11067	0.981588	0.90467	1.02252	1.02004	1.00705
68	1.16881	1.00806	0.8589	0.978344	0.995645	1.09513	1.0254	1.07344	0.845766	1.00307	0.864715	0.883284	0.838156	0.86273	1.11858	0.980984	0.904477	1.02534	1.01882	1.00799
68.33	1.15007	1.00301	0.855659	0.966257	0.992965	1.09056	1.03316	1.07734	0.833176	0.99616	0.866667	0.881811	0.824396	0.856536	1.1117	0.979302	0.903657	1.02322	1.01967	1.01105
68.67	1.15062	1.00779	0.857487	0.961322	1.00067	1.086	1.0194	1.08594	0.864023	1.00077	0.862439	0.907216	0.819337	0.857043	1.10793	0.968565	0.904477	1.02864	1.02068	1.02026
69	1.15277	0.993892	0.836713	0.965351	1.01843	1.09475	1.02716	1.08359	0.830973	0.978879	0.865691	0.891753	0.811081	0.849096	1.09728	0.977276	0.902113	1.02339	1.02248	1.01127
69.33	1.15258	1.00655	0.865963	0.969279	0.98258	1.0898	1.04021	1.08867	0.832546	1.00346	0.859512	0.884757	0.818204	0.857432	1.11482	0.978052	0.906648	1.02723	1.02481	1.02054
69.67	1.13869	0.994246	0.839704	0.963135	1.00235	1.09247	1.02257	1.09102	0.836009	0.99616	0.857236	0.87813	0.810879	0.848006	1.09884	0.97706	0.902113	1.02393	1.01925	1.03419
70	1.16004	1.00682	0.843693	0.961926	0.968174	1.07116	1.02928	1.07109	0.829714	1.00269	0.854309	0.892857	0.815654	0.855173	1.1125	1.00759	0.894298	1.0118	1.01209	1.00305
70.33	1.15277	0.997167	0.857487	0.967264	0.964489	1.07839	1.01446	1.0707	0.828455	1.0023	0.86374	0.893594	0.815573	0.854511	1.1125	1.02837	0.894732	1.00969	1.01177	1.00394
70.67	1.16126	1.00761	0.861559	0.98892	0.978224	1.07915	1.02399	1.08281	0.84136	0.99232	0.857886	0.903166	0.815816	0.854043	1.12944	0.989263	0.902885	1.02285	1.02274	1.00733
71	1.1621	1.00965	0.852834	0.971898	0.980235	1.09285	1.03457	1.1043	0.849229	0.986559	0.880976	0.899853	0.813105	0.855407	1.11783	0.982493	0.903512	1.02452	1.02789	1.01282
71.33	1.16368	1.00752	0.853665	0.969984	0.98526	1.07763	1.04938	1.08672	0.832232	0.99808	0.884228	0.908689	0.812538	0.856731	1.11342	0.980553	0.900569	1.02144	1.01988	1.01648
71.67	1.15893	1.00319	0.850507	0.97089	0.975209	1.0742	1.01305	1.07539	0.824048	1.00576	0.862114	0.887703	0.811405	0.848317	1.11304	0.980768	0.902451	1.02263	1.02343	1.02736
72	1.16322	1.00301	0.852751	0.970991	0.943719	1.06126	1.00494	1.06289	0.84136	1.01575	0.865366	0.882548	0.81096	0.853147	1.1153	0.978526	0.893236	1.01066	1.01325	1.00083
72.33	1.17422	1.02054	0.851005	0.981366	0.947404	1.07686	1.02787	1.0543	0.825307	0.998464	0.86439	0.869661	0.811081	0.852602	1.11632	0.976111	0.894298	1.01467	1.01506	0.998779
72.67	1.16974	1.03081	0.85649	0.974819	0.984255	1.0898	1.02857	1.10039	0.828455	0.975038	0.856585	0.871502	0.811283	0.853693	1.11853	0.979734	0.898832	1.02155	1.02513	1.01032
73	1.16779	1.03612	0.845438	0.965351	0.976884	1.09703	1.03104	1.08477	0.824992	0.987327	0.863089	0.87408	0.812295	0.855407	1.12487	0.977966	0.898447	1.02073	1.02646	1.0126
73.33	1.1607	1.00549	0.841034	0.967768	0.949079	1.07572	1.0321	1.07227	0.858357	1.00115	0.87122	0.878866	0.801085	0.843292	1.10557	0.979302	0.896951	1.01911	1.02587	1.01093
73.67	1.16471	1.02231	0.856573	1.01259	0.939028	1.0917	1.02998	1.06172	0.830658	0.997312	0.861789	0.89028	0.80752	0.853147	1.11616	0.972576	0.899846	1.02506	1.02449	1.00944
74	1.17599	1.02018	0.853914	0.980056	0.962814	1.0761	1.03175	1.07617	0.830343	1.00307	0.87122	0.879602	0.805698	0.852213	1.12057	0.980596	0.898495	1.02063	1.02259	1.00699
74.33	1.17935	1.01239	0.854662	0.978143	0.956449	1.08333	1.01376	1.06445	0.827825	0.995008	0.85626	0.897275	0.804565	0.850693	1.11589	0.984908	0.891306	1.0124	1.01325	0.997558
74.67	1.1884	1.0185	0.860811	0.98328	1.01407	1.08562	1.04056	1.08398	0.82814	1.00691	0.863415	0.892857	0.80497	0.851433	1.12552	0.984347	0.901534	1.01916	1.02545	1.00766
75	1.16891	1.00398	0.845355	0.979452	1.00201	1.08752	1.01305	1.05859	0.823733	0.980799	0.862764	0.877761	0.796511	0.842942	1.10809	0.984089	0.893863	1.03015	1.01484	1.00089
75.33	1.19586	1.01956	0.861227	0.960919	1.01407	1.09399	1.02998	1.07812	0.818697	0.993472	0.846504	0.885493	0.806629	0.854861	1.13133	0.966884	0.901438	1.0209	1.02269	1.01105
75.67	1.16918	1.02443	0.839621	0.979754	0.99598	1.08219	1.03245	1.07031	0.838212	1.00307	0.868618	0.892489	0.795338	0.842435	1.11159	0.981372	0.899411	1.02073	1.02216	1.01066
76	1.17142	1.0193	0.841532	0.974919	0.982915	1.08562	1.03915	1.07187	0.833491	0.994624	0.855935	0.881075	0.794893	0.842708	1.11014	0.976715	0.898543	1.02144	1.02349	1.00805
76.33	1.17506	1.01806	0.848845	0.982172	1.0325	1.08181	1.0194	1.06055	0.822789	0.985791	0.864715	0.876289	0.79295	0.842435	1.1124	0.975637	0.899508	1.03383	1.02455	1.00905
76.67	1.18877	1.03063	0.862888	0.970488	1	1.086	1.03351	1.0875	0.82814	0.999232	0.866341	0.882548	0.800761	0.851005	1.12433	0.976844	0.90192	1.0236	1.02274	1.02953
77	1.18569	1.02054	0.863055	0.965854	0.9866	1.09323	1.01905	1.08438	0.821845	1.00499	0.874797	0.903535	0.797523	0.84859	1.12724	0.976672	0.901003	1.02431	1.02449	1.01005
77.33	1.17618	1.02479	0.859398	0.966459	0.960134	1.09437	1.03351	1.07734	0.816808	0.984255	0.860163	0.889175	0.798494	0.849369	1.12772	0.975335	0.897723	1.02041	1.02465	1.00849
77.67	1.18877	1.02443	0.85192	0.974114	0.988945	1.09285	1.02328	1.07734	0.856468	0.993472	0.865366	0.89838	0.795014	0.84859	1.12417	0.978224	0.896613	1.01922	1.02036	1.00988
78	1.19642	1.03143	0.859731	0.977035	0.99062	1.09817	1.0515	1.09297	0.838527	0.988095	0.873496	0.878498	0.802096	0.853108	1.12805	0.976025	0.902161	1.02761	1.03059	1.01454
78.33	1.19455	1.03497	0.858401	0.969279	0.980905	1.09703	1.02963	1.07422	0.84073	1.00077	0.872846	0.904639	0.795176	0.848707	1.12735	0.979604	0.897047	1.02144	1.02322	1.01549
78.67	1.19633	1.02957	0.861891	0.974214	0.975209	1.08828	1.03527	1.08477	0.830028	1.00538	0.866667	0.88623	0.792869	0.848785	1.12944	0.976629	0.895214	1.02301	1.02619	1.00882
79	1.19194	1.02727	0.863221	0.963034	0.996315	1.08486	1.01305	1.07734	0.830343	0.988863	0.870569	0.896539	0.794609	0.849992	1.12767	0.967186	0.900039	1.02561	1.02306	1.01049
79.33	1.18737	1.03045	0.856905	0.974214	0.994305	1.09513	1.01587	1.07578	0.832232	1.00499	0.884878	0.876289	0.791979	0.849252	1.12842	0.981156	0.899218	1.02663	1.02831	1.07565
79.67	1.20323	1.03187	0.858235	0.978747	0.968174	1.08486	1.02892	1.06289	0.82751	0.993088	0.877073	0.903903	0.795216	0.851472	1.13746	0.979561	0.895407	1.02322	1.02227	1.01093
80	1.19334	1.03364	0.857487	0.979754	0.985595	1.08333	1.0254	1.08906	0.836009	0.990783	0.88065	0.91053	0.789469	0.847421	1.12901	1.04545	0.900762	1.02761	1.02688	1.01471
80.33	1.18653	1.03072	0.839704	0.967365	1.01608	1.11682	1.02575	1.0707	0.82814	0.995776	0.87187	0.919367	0.781294	0.838462	1.11923	1.0329	0.90192	1.02831	1.02942	1.01615
80.67	1.19996	1.03665	0.859481	0.97502	1.00034	1.08828	1.04762	1.06836	0.812716	1.00038	0.860488	0.872239	0.788579	0.847149	1.1309	0.976456	0.900087	1.02534	1.02842	1.01288
81	1.21703	1.0417	0.858069	0.964142	0.971859	1.08562	1.02998	1.07344	0.835065	1.00653	0.88813	0.887334	0.797442	0.85155	1.13767	0.979216	0.893381	1.02041	1.02608	1.00821
81.33	1.19259	1.02921	0.850507	0.960516	0.99129	1.10883	1.03986	1.07578	0.822474	1.00998	0.878049	0.891384	0.777976	0.839592	1.12519	0.976456	0.898929	1.03844	1.02773	1.01454
81.67	1.2008	1.05374	0.862888	0.977337	0.985595	1.09285	1.02152	1.06953	0.837583	0.983871	0.872846	0.888071	0.787446	0.846915	1.13498	0.978483	0.893912	1.02063	1.02725	1.00905
82	1.19082	1.02514	0.847349	0.972603	0.990955	1.09399	1.04832	1.07812	0.819956	1.00077	0.875772	0.893594	0.777692	0.839748	1.121	0.974947	0.898061	1.02961	1.03319	1.01438
82.33	1.19875	1.05382	0.857903	0.979754	0.981575	1.08029	1.03457	1.09102	0.833491	1.00576	0.886179	0.889543	0.78267	0.846058	1.13272	0.978354	0.892127	1.0242	1.03033	1.00938
82.67	1.20864	1.03966	0.853914	0.978243	0.969849	1.09323	1.02363	1.09297	0.840101	1.00154	0.867967	0.884757	0.783277	0.845668	1.13283	1.03294	0.888219	1.01104	1.01983	1.01471
83	1.20313	1.03984	0.857653	0.976531	0.965494	1.07154	1.03034	1.06094	0.832546	1.01306	0.882927	0.902062	0.781659	0.846681	1.13773	0.97982	0.888315	1.01207	1.01962	1.01182
83.33	1.2119	1.03506	0.854662	0.963034	0.976214	1.08067	1.02751	1.08594	0.838842	1.00922	0.849756	0.870398	0.784896	0.8482	1.1352	0.967401	0.895359	1.02528	1.03382	1.0474
83.67	1.21078	1.03665	0.863969	0.975927	0.979899	1.08676	1.03139	1.06914	0.823104	1.02535	0.890081	0.883652	0.784613	0.843838	1.13891	0.979518	0.891644	1.02523	1.03218	1.01127
84	1.19269	1.02859	0.847765	0.983683	0.98928	1.09209	1.03739	1.0793	0.847655	1.00499	0.890732	0.917526	0.772512	0.835891	1.12417	0.982105	0.892513	1.01792	1.0229	1.00566
84.33	1.2106	1.03709	0.854994	0.977135	0.977889	1.09056	1.04938	1.09922	0.83412	0.995776	0.882602	0.883284	0.778745	0.843682	1.13444	0.979259	0.895166	1.01965	1.03542	1.01454
84.67	1.20658	1.0463	0.855991	0.976128	0.974874	1.07725	1.03104	1.06367	0.813031	0.995392	0.860163	0.888071	0.779675	0.840994	1.136	0.978785	0.882864	1.0105	1.0211	1.01399
85	1.21293	1.05382	0.863636	0.976128	0.98526	1.09589	1.04409	1.09688	0.807995	0.995008	0.885203	0.879234	0.785422	0.850382	1.13885	0.978052	0.892706	1.02008	1.03335	1.02892
85.33	1.25098	1.04603	0.856407	0.97502	0.9866	1.10997	1.0321	1.08906	0.825936	1	0.874472	0.905744	0.779756	0.843214	1.14477	0.976629	0.89314	1.02312	1.03457	1.0212
85.67	1.21405	1.03568	0.858318	0.977538	0.986935	1.07839	1.03633	1.09102	0.8209	0.998464	0.884553	0.89838	0.77575	0.841189	1.13821	0.98038	0.890824	1.02333	1.03557	1.01282
86	1.21255	1.03116	0.849759	0.987712	0.973534	1.09741	1.02504	1.10078	0.82153	0.995776	0.870244	0.91458	0.769841	0.829698	1.12407	0.978354	0.89478	1.02063	1.03446	1.01504
86.33	1.21899	1.05002	0.862639	0.973811	0.98727	1.08676	1.03774	1.09766	0.812402	1.00768	0.867967	0.901325	0.775628	0.843253	1.13837	1.05425	0.895069	1.02604	1.03716	1.02631
86.67	1.21974	1.04108	0.868041	0.974013	0.994305	1.09056	1.04691	1.09961	0.805792	1.00461	0.876423	0.893962	0.777409	0.843565	1.1423	0.977276	0.892706	1.02084	1.03303	1.01232
87	1.21526	1.04595	0.85408	0.975222	0.99062	1.09475	1.05538	1.10547	0.833176	0.993088	0.878049	0.878498	0.771257	0.84228	1.14165	0.975077	0.887447	1.02431	1.03759	1.00955
87.33	1.21768	1.037	0.852418	0.969279	0.967504	1.07116	1.05326	1.1	0.827825	1.0169	0.878699	0.907953	0.774576	0.832658	1.14036	0.973567	0.891644	1.02214	1.03398	1.02786
87.67	1.22375	1.04409	0.859066	0.977337	0.972864	1.08486	1.07019	1.08594	0.809569	1.00038	0.901138	0.913844	0.76972	0.841656	1.14251	0.998965	0.887109	1.02285	1.03663	1.02814
88	1.23139	1.05692	0.868124	0.974013	0.971859	1.086	1.04832	1.10312	0.82751	1	0.883902	0.899485	0.776964	0.844227	1.15214	0.977793	0.889473	1.02003	1.03414	1.0101
88.33	1.23149	1.0509	0.858817	0.984287	0.973199	1.07306	1.01517	1.09453	0.819012	1.00614	0.877724	0.909057	0.768101	0.84076	1.14407	0.975939	0.883201	1.01131	1.02412	1.04357
88.67	1.2257	1.04807	0.85649	0.985898	0.988945	1.09361	1.05256	1.11328	0.815864	0.991551	0.868618	0.888807	0.767372	0.841345	1.14197	0.988875	0.892657	1.02712	1.03743	1.01399
89	1.24044	1.06277	0.865963	1.01622	0.979899	1.07953	1.04656	1.10586	0.80831	1.01382	0.881951	0.904271	0.771419	0.842435	1.14945	0.97982	0.886482	1.02268	1.03579	1.0111
89.33	1.23391	1.03904	0.864301	0.985496	0.953099	1.09779	1.04586	1.08281	0.830658	1.00538	0.887805	0.915317	0.769112	0.837644	1.14628	0.981458	0.889714	1.02046	1.03754	1.03808
89.67	1.21778	1.03063	0.847017	0.98338	0.966499	1.09056	1.05291	1.09141	0.821215	1.01152	0.885203	0.903903	0.758995	0.829308	1.13332	0.978138	0.887592	1.02117	1.03663	1.01932

## Sheet: Figure 3-figure supplement 4B
	Fluorescence intensity at 680 nm												Fluorescence intensity at 590 nm
	Atto550 + Atto647n				Atto550				Atto647n				Atto550 + Atto647n				Atto550
time (min)	PBP1B	+Amp	+Moe	only labelled	PBP1B	+Amp	+Moe	only labelled	PBP1B	+Amp	+Moe	only labelled	PBP1B	+Amp	+Moe	only labelled	PBP1B	+Amp	+Moe	only labelled
0	1	1	1	1	1	1	1	1	1	1	1	1	1	1	1	1	1	1	1	1
0.33	0.986041	0.991554	1.01659	1.01179	0.969865	0.990741	1.00619	0.996039	1.00177	0.980202	0.989631	0.994887	0.975647	0.966329	1.01291	1.00717	0.983912	0.977196	0.988845	0.990413
0.67	0.992368	0.998112	1.01057	1.01692	0.98414	0.979469	0.993807	0.992518	1.00222	0.959965	0.978111	0.970601	0.950485	0.939201	1.00997	1.00618	0.978453	0.971872	0.984616	0.986628
1	1.00703	1.00219	1.01293	1.02133	0.969072	0.985507	1.00372	1.00352	0.986696	0.979762	0.957757	0.985087	0.945729	0.931655	1.00997	0.999597	0.971309	0.960991	0.984984	0.98032
1.33	1.01416	1.02097	0.985039	1.00656	0.969072	0.977456	1.01569	0.998239	0.984035	0.959525	0.956989	0.997444	0.920186	0.906772	0.994647	0.979576	0.964572	0.953177	0.978242	0.975716
1.67	1.03043	1.0313	0.98691	1.012	0.949247	0.96256	1.01817	1.04313	0.999557	0.956445	0.959293	0.973157	0.914003	0.894211	0.996432	0.973261	0.967011	0.957865	0.984923	0.975148
2	1.03665	1.03955	0.985853	1.01179	0.943299	0.994364	0.987201	1.00616	0.999557	0.959525	0.949693	0.982957	0.901731	0.880552	0.994385	0.971559	0.945116	0.950631	0.961878	0.956415
2.33	1.07973	1.0624	0.987235	1.03128	0.951626	0.979871	1.01569	0.990757	0.9898	0.963924	0.958909	0.984235	0.948773	0.880886	1.00126	0.973933	0.952317	0.953409	0.976097	0.964488
2.67	1.07502	1.05912	0.987967	1.04584	0.956384	0.966184	0.996284	1.01012	1.00044	0.965244	0.950845	0.96847	0.898973	0.85992	1.00478	0.972276	0.940411	0.937898	0.962797	0.948089
3	1.08385	1.07353	0.97512	1.02933	0.934179	0.968599	0.999587	0.984595	0.993348	0.968324	0.953149	0.976992	0.887414	0.852995	0.996484	0.956376	0.934719	0.932805	0.966229	0.946953
3.33	1.09299	1.09102	0.971298	1.02492	0.953608	0.977053	1.00165	1.00704	0.997339	0.985042	0.951229	0.974435	0.881041	0.850798	0.995644	0.949792	0.942095	0.937203	0.975545	0.956982
3.67	1.0952	1.0935	0.982275	1.05005	0.951229	0.956119	1.02064	0.992958	0.993792	0.970963	0.951613	0.96421	0.873954	0.840338	1.00682	0.957675	0.94105	0.933152	0.977384	0.963732
4	1.11107	1.10731	0.978779	1.04594	0.95678	0.956522	1.02601	1.04445	0.978271	0.955125	0.945469	0.971453	0.864393	0.832028	1.00415	0.95324	0.937972	0.929795	0.977016	0.962155
4.33	1.10866	1.11139	0.967558	1.04738	0.930214	0.964573	1.01404	1.07482	0.990244	0.957325	0.941244	0.959523	0.84708	0.813975	1.0043	0.949165	0.933848	0.929506	0.975668	0.95755
4.67	1.12723	1.11983	0.964062	1.04717	0.930214	0.964573	1.02973	1.02509	0.971175	0.959965	0.951229	0.966766	0.845843	0.8145	1.00094	0.94267	0.935068	0.925628	0.980203	0.955658
5	1.12944	1.13484	0.963086	1.05876	0.950833	0.954509	1.03509	1.04974	0.980931	0.966564	0.94278	0.971879	0.837804	0.808052	1.00199	0.936266	0.930131	0.924876	0.980571	0.954712
5.33	1.13507	1.1401	0.965526	1.06697	0.952022	0.959742	1.02064	1.04445	0.986696	0.974923	0.927419	0.96634	0.819302	0.793581	1.00115	0.933578	0.931235	0.926612	0.986271	0.955595
5.67	1.13236	1.1408	0.943247	1.05087	0.927439	0.97504	1.02931	0.976673	0.985809	0.966564	0.959677	0.973583	0.812452	0.785892	0.990554	0.920052	0.917122	0.913358	0.972052	0.94443
6	1.15204	1.1559	0.959753	1.07251	0.936558	0.957327	1.03303	1.02685	0.987583	0.970524	0.935484	0.95654	0.813927	0.786226	1.00771	0.935191	0.924265	0.92256	0.987374	0.958496
6.33	1.16168	1.16077	0.956582	1.07281	0.948057	0.973833	1.04335	1.03873	0.985809	0.962165	0.951613	0.971027	0.807886	0.778393	1.00031	0.923232	0.919851	0.916657	0.985352	0.962218
6.67	1.17142	1.17578	0.95089	1.06174	0.950833	0.97182	1.05822	1.05986	0.971175	0.966124	0.93126	0.95654	0.799943	0.772949	0.994332	0.913602	0.919096	0.914921	0.988416	0.959127
7	1.17363	1.18303	0.953736	1.08112	0.948454	0.960145	1.00041	1.00968	1.00665	0.955125	0.936252	0.965488	0.787671	0.760913	1.00436	0.920007	0.910268	0.904156	0.9715	0.949729
7.33	1.19753	1.19406	0.959672	1.09138	0.942506	0.944847	1.03922	0.983275	0.984922	0.962165	0.940092	0.956114	0.788623	0.763015	1.01322	0.92574	0.920374	0.913069	0.989949	0.950549
7.67	1.1898	1.20131	0.951541	1.09107	0.935765	0.974235	1.03427	0.993838	0.971619	0.948966	0.943548	0.970175	0.782011	0.758668	1.00556	0.917141	0.918574	0.908554	0.987558	0.950801
8	1.20506	1.2036	0.945036	1.09517	0.931404	0.954106	1.04377	0.987236	0.987583	0.980642	0.943164	0.972305	0.776303	0.751122	1.0063	0.914453	0.914798	0.90757	0.99099	0.946953
8.33	1.21611	1.2349	0.951134	1.10471	0.932593	0.954509	1.04789	1.00088	0.979601	0.985482	0.924347	0.962079	0.771024	0.746633	1.01065	0.912393	0.914973	0.905313	0.993565	0.942854
8.67	1.21641	1.23162	0.948126	1.0883	0.94885	0.953704	1.06647	1.05238	0.983592	0.963044	0.923579	0.960375	0.765459	0.742908	1.0096	0.910243	0.918167	0.912374	1.00435	0.951495
9	1.21912	1.22784	0.946012	1.10501	0.94092	0.954106	1.04253	1.01144	0.98847	0.973603	0.9351	0.963357	0.762367	0.736938	1.01244	0.907959	0.911546	0.901262	0.999265	0.940898
9.33	1.23378	1.234	0.935848	1.09158	0.942902	0.951288	1.02766	1.04401	0.972506	0.970524	0.93126	0.959523	0.756183	0.733833	1.00336	0.894746	0.91021	0.902477	0.997487	0.945187
9.67	1.23509	1.24682	0.955362	1.11189	0.934576	0.960145	1.02601	1.02905	0.992018	0.969644	0.93126	0.959949	0.752473	0.729821	1.0148	0.903346	0.907597	0.897615	0.996323	0.942349
10	1.25387	1.26341	0.950728	1.12214	0.948057	0.93277	1.05078	1	0.966297	0.952046	0.906298	0.971027	0.753662	0.729487	1.01643	0.902316	0.904751	0.896689	1.00178	0.940267
10.33	1.24945	1.25696	0.939833	1.11455	0.935765	0.95934	1.03303	1.03213	0.959202	0.961285	0.935484	0.965062	0.746623	0.721368	1.00682	0.888521	0.894645	0.888992	0.993932	0.940835
10.67	1.26833	1.27226	0.947638	1.11353	0.924663	0.951288	1.05244	0.998239	0.958758	0.958645	0.922043	0.967192	0.746338	0.721989	1.01664	0.895732	0.903473	0.896979	1.00233	0.941655
11	1.26049	1.26967	0.941703	1.12891	0.931404	0.943639	1.05574	1.02069	0.968071	0.966124	0.939324	0.952706	0.73378	0.711147	1.02041	0.893403	0.902253	0.89339	1.0068	0.941403
11.33	1.27405	1.27931	0.938125	1.12819	0.936955	0.940821	1.03716	1.02201	0.994678	0.954685	0.929339	0.958245	0.731878	0.707231	1.02183	0.892731	0.90144	0.890612	1.00435	0.941655
11.67	1.28831	1.2961	0.950646	1.14491	0.941713	0.936795	1.04377	1.02421	0.958315	0.934008	0.914363	0.951001	0.732068	0.710861	1.02771	0.893492	0.901208	0.889339	1.00662	0.943358
12	1.27696	1.28408	0.937881	1.13886	0.934576	0.950483	1.05037	1.02685	0.966741	0.956885	0.91129	0.957392	0.725171	0.700306	1.02167	0.888162	0.903531	0.898021	1.01508	0.947837
12.33	1.28439	1.28915	0.946906	1.14234	0.952815	0.950886	1.06193	1.08275	0.944568	0.957765	0.919355	0.950575	0.717561	0.695912	1.02566	0.888565	0.901382	0.896226	1.01587	0.946638
12.67	1.29263	1.29054	0.933653	1.13229	0.934576	0.947262	1.05285	1.0154	0.956984	0.945886	0.939324	0.947593	0.716372	0.695673	1.01501	0.876607	0.896097	0.89067	1.00907	0.94771
13	1.29424	1.30038	0.94032	1.1444	0.952419	0.938808	1.03055	0.990757	0.978271	0.966124	0.946237	0.953558	0.71114	0.690085	1.02566	0.882609	0.894471	0.887776	1.00852	0.937555
13.33	1.30488	1.30554	0.955444	1.1566	0.919508	0.942029	1.04583	0.989877	0.972949	0.966564	0.94278	0.947593	0.710902	0.687076	1.03201	0.887267	0.886049	0.875391	1.00055	0.930617
13.67	1.29896	1.31479	0.93097	1.13414	0.946868	0.950081	1.06358	1.02905	0.960976	0.964804	0.9351	0.955688	0.706478	0.68359	1.01333	0.869306	0.899001	0.893333	1.02274	0.945818
14	1.31161	1.32949	0.929344	1.14798	0.912768	0.947665	1.06565	1.02377	0.976497	0.977123	0.942396	0.962079	0.701722	0.679626	1.0128	0.865634	0.891335	0.886272	1.01453	0.941592
14.33	1.31794	1.31816	0.936499	1.14952	0.942902	0.955314	1.0545	1.05766	0.967184	0.979762	0.937404	0.962931	0.697917	0.676808	1.02561	0.869485	0.890057	0.882857	1.01526	0.9397
14.67	1.32617	1.33247	0.93406	1.15804	0.923473	0.950886	1.05078	1.07086	0.974279	0.962165	0.928571	0.967618	0.692209	0.674706	1.02661	0.871814	0.888605	0.883899	1.01673	0.936861
15	1.32707	1.31797	0.94032	1.15629	0.918319	0.940821	1.05698	1.03125	0.968958	0.974923	0.931644	0.95654	0.690306	0.671124	1.0297	0.869978	0.887676	0.881757	1.01655	0.941907
15.33	1.33601	1.33247	0.93219	1.15055	0.917526	0.938406	1.06647	1.02553	0.968514	0.974483	0.938556	0.96847	0.686977	0.667112	1.02981	0.867425	0.883552	0.881641	1.01606	0.943737
15.67	1.3325	1.34221	0.939833	1.16234	0.925852	0.950886	1.05822	1.0066	0.969845	0.974483	0.934332	0.968896	0.683933	0.664151	1.02661	0.864648	0.888024	0.881873	1.01888	0.936672
16	1.34907	1.34718	0.939995	1.16193	0.933783	0.950483	1.07225	1.00044	0.991574	0.958205	0.94278	0.940349	0.689022	0.667638	1.03154	0.864917	0.884714	0.878632	1.0179	0.937177
16.33	1.33752	1.34201	0.930726	1.17916	0.929025	0.940821	1.06193	1.03389	0.979157	0.982842	0.93894	0.964636	0.67989	0.660713	1.03206	0.864872	0.885469	0.878169	1.01869	0.940583
16.67	1.36001	1.3749	0.933165	1.17875	0.925059	0.934783	1.064	1.06338	0.955654	0.967444	0.945469	0.962079	0.681079	0.664056	1.03484	0.862767	0.88634	0.879211	1.02304	0.944178
17	1.34615	1.35483	0.935767	1.17332	0.934179	0.943237	1.05656	1.06426	0.980488	0.984162	0.963518	0.971453	0.67109	0.653644	1.03868	0.861199	0.885817	0.880484	1.02286	0.943295
17.33	1.35439	1.35225	0.926254	1.15814	0.929025	0.933977	1.07019	1.02509	0.998226	1.00484	0.948541	0.96847	0.668046	0.654122	1.02561	0.849599	0.883436	0.877764	1.02611	0.949035
17.67	1.356	1.3592	0.938857	1.18142	0.934972	0.939614	1.0768	1.01805	0.988027	0.966564	0.938172	0.971453	0.668331	0.649537	1.03747	0.859497	0.883494	0.877011	1.02501	0.943295
18	1.37146	1.35632	0.934222	1.18419	0.93973	0.94847	1.07556	1.03213	0.985809	0.976683	0.945084	0.945036	0.664098	0.648056	1.02876	0.847539	0.891277	0.883609	1.03395	0.948089
18.33	1.36634	1.37589	0.933409	1.19475	0.935369	0.942432	1.0929	1.08099	0.980488	0.965244	0.954301	0.955262	0.662196	0.645	1.04056	0.857258	0.886514	0.883378	1.03567	0.957046
18.67	1.36704	1.36874	0.93658	1.20347	0.92387	0.937198	1.09661	1.04313	0.973836	0.971403	0.945084	0.956966	0.654538	0.641322	1.04067	0.854168	0.887211	0.881757	1.03555	0.951053
19	1.36885	1.37003	0.927555	1.19116	0.927835	0.930757	1.08216	1.04401	0.972949	0.979322	0.943164	0.958671	0.655441	0.637931	1.02981	0.84624	0.882565	0.878169	1.03132	0.951747
19.33	1.37959	1.38613	0.947638	1.19147	0.912371	0.942432	1.07803	1.00176	0.989357	0.986362	0.933564	0.95654	0.651684	0.636498	1.04256	0.85269	0.878499	0.872844	1.02997	0.941466
19.67	1.38231	1.38394	0.928612	1.1889	0.914354	0.943639	1.06111	0.990757	0.981375	0.984602	0.954685	0.958245	0.647879	0.634015	1.03154	0.845703	0.877105	0.875101	1.03009	0.939826
20	1.38462	1.38245	0.939101	1.20172	0.929818	0.957327	1.07556	0.996479	1	0.963924	0.941628	0.95441	0.644406	0.630528	1.04209	0.853137	0.880358	0.874696	1.03144	0.938186
20.33	1.39777	1.37788	0.928856	1.2009	0.915147	0.922705	1.07184	1.0154	0.974723	0.962165	0.937404	0.959949	0.645215	0.629048	1.04256	0.855556	0.87757	0.877706	1.03389	0.939006
20.67	1.37377	1.37629	0.937393	1.21372	0.933386	0.963768	1.08092	1.02201	1.00133	0.985482	0.957373	0.95441	0.634085	0.620355	1.05185	0.857124	0.881519	0.878516	1.0391	0.946323
21	1.40801	1.38851	0.929913	1.20788	0.933783	0.946055	1.06606	1.05018	0.984922	0.977123	0.937404	0.961227	0.638366	0.626707	1.04266	0.848793	0.872459	0.873018	1.02887	0.938564
21.33	1.38944	1.4055	0.948207	1.22716	0.917129	0.926731	1.07803	1.07306	0.981818	0.963044	0.956221	0.983383	0.634418	0.624654	1.0561	0.855287	0.87333	0.872844	1.0315	0.943547
21.67	1.40088	1.40938	0.934548	1.22993	0.921094	0.938808	1.04996	1.00088	0.999113	0.981522	0.945084	0.959523	0.634465	0.622696	1.04634	0.849554	0.871297	0.870297	1.02954	0.935411
22	1.39787	1.40322	0.941865	1.22275	0.915147	0.92029	1.06854	0.981514	0.995122	0.976243	0.943164	0.960801	0.63223	0.618158	1.05048	0.84409	0.868742	0.867172	1.03199	0.933708
22.33	1.41344	1.40719	0.935767	1.22326	0.915147	0.909018	1.05822	1.04842	0.987583	0.983722	0.951997	0.956966	0.630327	0.620069	1.05096	0.843105	0.859856	0.859417	1.02145	0.927968
22.67	1.42037	1.42548	0.93219	1.23392	0.910785	0.917069	1.07886	1.04401	0.997339	1.00792	0.961598	0.974862	0.632896	0.623555	1.05374	0.843015	0.871878	0.865899	1.02973	0.937303
23	1.41203	1.41306	0.934873	1.22398	0.917129	0.938406	1.07514	1.05326	0.972506	0.980202	0.944316	0.949297	0.627331	0.617155	1.05421	0.841761	0.867871	0.864973	1.03254	0.939637
23.33	1.41906	1.41663	0.938369	1.2329	0.921491	0.917472	1.0929	1.04049	1.00488	0.994721	0.941628	0.96421	0.623811	0.613	1.05379	0.841358	0.869265	0.864741	1.03818	0.939447
23.67	1.41866	1.41723	0.929506	1.22654	0.911182	0.927939	1.08794	1.03389	0.982705	0.987681	0.96659	0.972731	0.621766	0.61023	1.04775	0.831684	0.867058	0.86069	1.0369	0.945124
24	1.43161	1.43025	0.929019	1.23577	0.921887	0.93277	1.0962	1.0493	0.992905	0.991201	0.946621	0.966766	0.620767	0.609753	1.0551	0.841851	0.872633	0.866651	1.04572	0.949161
24.33	1.43593	1.41614	0.933978	1.24808	0.916336	0.927134	1.07969	1.05942	1.00887	1.00088	0.956221	0.975288	0.618721	0.608415	1.0573	0.841313	0.866477	0.864278	1.03867	0.948215
24.67	1.44407	1.45171	0.932921	1.25023	0.908406	0.937198	1.12221	1.10211	1.00931	0.995161	0.942396	0.964636	0.619958	0.615579	1.05458	0.841179	0.872691	0.866941	1.05087	0.957866
25	1.43935	1.42756	0.928937	1.26172	0.928232	0.925926	1.06028	1.08671	0.994678	0.970524	0.937404	0.974009	0.61406	0.605932	1.05715	0.841403	0.868161	0.862947	1.04088	0.951621
25.33	1.44025	1.43323	0.934222	1.24756	0.913957	0.917874	1.07803	1.02465	0.996452	0.995601	0.938556	0.958671	0.611634	0.604786	1.05563	0.840193	0.857881	0.851893	1.02973	0.936231
25.67	1.4519	1.44118	0.930076	1.25567	0.910785	0.94847	1.08382	1.04269	1.00089	0.977123	0.939708	0.966766	0.616105	0.605884	1.05589	0.839432	0.866825	0.863468	1.04198	0.947837
26	1.44818	1.42995	0.930807	1.25659	0.916733	0.925926	1.09455	1.07174	0.984922	0.99736	0.936636	0.95654	0.609399	0.601013	1.05452	0.834684	0.868742	0.863873	1.04443	0.949855
26.33	1.44999	1.43671	0.923896	1.24469	0.896114	0.931965	1.09125	1.05502	1.00576	0.988561	0.943164	0.974435	0.605213	0.598672	1.0466	0.829131	0.86549	0.862542	1.04303	0.948909
26.67	1.44316	1.43154	0.926823	1.25485	0.91594	0.935185	1.08588	1.06558	1.0133	1.00704	0.959293	0.977418	0.602787	0.59404	1.05452	0.833296	0.8555	0.854439	1.03549	0.94134
27	1.45602	1.43859	0.927799	1.26274	0.901665	0.922303	1.10528	1.05898	1.00044	0.99604	0.959293	0.953984	0.601979	0.594756	1.05405	0.834953	0.864677	0.861558	1.04909	0.949035
27.33	1.45451	1.43651	0.931377	1.26582	0.902855	0.939614	1.09827	1.06074	0.99867	1.01232	0.976575	0.979974	0.603691	0.592225	1.06119	0.834505	0.864154	0.865436	1.04591	0.946638
27.67	1.46124	1.44624	0.927718	1.26879	0.913957	0.937601	1.09661	1.08759	0.99867	1.01892	0.954685	0.976566	0.601884	0.588834	1.05683	0.829265	0.862237	0.863989	1.04652	0.951306
28	1.46907	1.44416	0.929019	1.2571	0.91475	0.923913	1.09992	1.02729	1.00754	1.01496	0.967358	0.959097	0.59765	0.58955	1.05935	0.830385	0.853583	0.856696	1.03677	0.936988
28.33	1.45863	1.45022	0.928531	1.2773	0.938144	0.923913	1.08671	1.02817	1.00843	0.99912	0.96659	0.975288	0.595986	0.586159	1.05998	0.830967	0.863515	0.86451	1.04707	0.946323
28.67	1.46515	1.44416	0.933328	1.27607	0.923473	0.951288	1.0995	1.02773	0.995565	0.995601	0.948157	0.973157	0.596556	0.588022	1.06733	0.830922	0.863805	0.867635	1.04725	0.945566
29	1.4771	1.46413	0.929588	1.27413	0.913561	0.936393	1.12015	1.06954	0.98714	1.01188	0.967358	0.982957	0.59375	0.586207	1.07053	0.829579	0.868103	0.868851	1.0597	0.955153
29.33	1.48895	1.46443	0.917961	1.26766	0.902855	0.925121	1.08505	1.03257	0.999557	1.0044	0.950845	0.960801	0.591895	0.588308	1.05657	0.81753	0.863225	0.864741	1.05344	0.946512
29.67	1.47188	1.44833	0.935848	1.27218	0.897304	0.924316	1.09249	1.00836	1.00976	1.01056	0.970814	0.967618	0.588423	0.58401	1.06932	0.823398	0.851783	0.854844	1.04339	0.934969
30	1.49408	1.46473	0.940402	1.26972	0.920698	0.936393	1.09785	1.07174	0.997783	0.994721	0.963518	0.974862	0.591752	0.589311	1.06003	0.818068	0.861366	0.8637	1.04995	0.948152
30.33	1.49217	1.47128	0.931377	1.29556	0.917922	0.929952	1.08299	1.06734	1.0306	1.01496	0.965822	0.982957	0.585046	0.583007	1.07315	0.826936	0.861714	0.865089	1.04793	0.947584
30.67	1.48925	1.45707	0.925522	1.26449	0.923473	0.939211	1.08299	1.05634	1.00355	0.995601	0.960829	0.972305	0.587091	0.58081	1.06009	0.813544	0.860901	0.861269	1.05203	0.948278
31	1.49106	1.46463	0.932271	1.29638	0.913561	0.930757	1.09744	1.04665	1.00798	1	0.963518	0.975288	0.582953	0.5821	1.07084	0.820442	0.849924	0.853224	1.04296	0.938817
31.33	1.49558	1.47436	0.931458	1.29125	0.916733	0.924316	1.10405	1.0559	1.00177	1.02816	0.958141	0.998722	0.580765	0.58081	1.07509	0.82174	0.858985	0.859995	1.06239	0.949224
31.67	1.49267	1.46433	0.933734	1.29279	0.913164	0.935588	1.109	1.08979	1.01641	1.01584	0.966206	0.975714	0.580812	0.580476	1.07446	0.821382	0.858462	0.861153	1.05246	0.952441
32	1.48875	1.48211	0.934629	1.30428	0.892546	0.93438	1.10652	1.09067	0.992905	1.00792	0.956989	0.97614	0.575342	0.576607	1.07698	0.820173	0.850273	0.85386	1.04774	0.942727
32.33	1.50502	1.48708	0.933409	1.29915	0.919112	0.935185	1.09785	1.0559	1.01729	1.0088	0.971966	0.973157	0.579671	0.585443	1.07567	0.818426	0.858811	0.86069	1.05841	0.943863
32.67	1.48785	1.48271	0.928693	1.28295	0.918715	0.94686	1.08547	1.10563	1.01064	1.01804	0.952765	0.980401	0.575818	0.577753	1.06266	0.808573	0.857533	0.862658	1.06086	0.954333
33	1.46746	1.4683	0.936418	1.28674	0.92268	0.922303	1.09249	1.08011	0.99867	1.0132	0.971966	0.992331	0.567589	0.569013	1.0827	0.81865	0.86003	0.863642	1.06754	0.953198
33.33	1.50512	1.48639	0.940646	1.31443	0.904044	0.928744	1.08671	1.02025	1.01818	1.01628	0.959293	0.967192	0.572917	0.576941	1.08669	0.821024	0.848763	0.855192	1.05179	0.937303
33.67	1.5011	1.48758	0.923408	1.29597	0.923077	0.938406	1.10281	1.09727	1.00754	0.992961	0.965054	0.960801	0.572489	0.575556	1.06932	0.808573	0.859159	0.862021	1.06111	0.954018
34	1.51637	1.50437	0.943817	1.3053	0.930214	0.943237	1.10941	1.03521	1.00798	1.0022	0.969662	0.979548	0.573154	0.5757	1.08921	0.820576	0.862876	0.870124	1.0654	0.951747
34.33	1.52259	1.51858	0.929506	1.29587	0.90563	0.928744	1.08918	1.0537	1.02483	1.01628	0.97427	0.980401	0.574201	0.579473	1.06995	0.805079	0.848066	0.852298	1.04836	0.942601
34.67	1.53043	1.50576	0.940808	1.32356	0.902062	0.919485	1.09249	1.04137	0.996452	1.0154	0.962366	0.995739	0.571252	0.573694	1.0922	0.820979	0.85974	0.861674	1.05982	0.95118
35	1.51567	1.50219	0.933653	1.31094	0.900872	0.940016	1.11767	1.04489	1.00621	1.00968	0.960061	0.980827	0.566162	0.57355	1.08501	0.81238	0.857126	0.85988	1.06411	0.948215
35.33	1.5236	1.50119	0.936824	1.31484	0.91594	0.930757	1.10405	1.0669	1.02262	1.01848	0.977727	0.98807	0.565354	0.570303	1.08617	0.813902	0.855907	0.861269	1.06527	0.952567
35.67	1.51607	1.49871	0.943491	1.3212	0.928232	0.954509	1.1346	1.10035	1.01508	1.00616	0.961982	0.970601	0.563071	0.571067	1.09304	0.820039	0.860495	0.868445	1.07189	0.951999
36	1.50683	1.49791	0.933491	1.31956	0.911182	0.936393	1.10363	1.06822	1.00488	1.02244	0.961982	0.970601	0.556935	0.563425	1.08559	0.807408	0.854106	0.861905	1.06705	0.948972
36.33	1.53093	1.50795	0.933165	1.30366	0.915147	0.928744	1.11561	1.114	1.02528	1.0176	0.973118	0.980827	0.562072	0.569204	1.08375	0.807856	0.855616	0.863005	1.06484	0.956099
36.67	1.52691	1.50795	0.926661	1.30233	0.904044	0.927134	1.12386	1.09727	1.01463	1.01452	0.987327	0.980401	0.560788	0.567963	1.07069	0.798406	0.850796	0.8615	1.06282	0.949035
37	1.54559	1.52256	0.933165	1.30715	0.90682	0.931562	1.12593	1.05898	1.01109	0.995161	0.97619	0.963784	0.559694	0.566864	1.08648	0.806557	0.855384	0.860458	1.06828	0.949729
37.33	1.52651	1.51272	0.930238	1.31258	0.894925	0.928744	1.12304	1.0603	1.0102	1.00836	0.963134	0.974009	0.558552	0.566864	1.08758	0.80808	0.854513	0.860458	1.06846	0.950296
37.67	1.53324	1.52325	0.937881	1.30817	0.917526	0.933977	1.1185	1.08319	1.02084	1.01496	0.96659	0.979548	0.557553	0.565527	1.08396	0.801227	0.853525	0.858491	1.06748	0.950612
38	1.5465	1.5313	0.937637	1.32725	0.919905	0.919082	1.11396	1.04049	1.00177	1.011	0.960061	0.972305	0.558647	0.570064	1.09183	0.805348	0.852712	0.857217	1.06871	0.944872
38.33	1.53465	1.51928	0.93219	1.32356	0.92387	0.935588	1.109	1.09155	1.01774	1.01848	0.981951	0.973583	0.556792	0.565479	1.09288	0.805796	0.854164	0.857217	1.06681	0.94954
38.67	1.55192	1.53746	0.945931	1.3293	0.90682	0.921095	1.10198	1.10783	0.992018	1.0154	0.981951	0.979548	0.557934	0.567342	1.0985	0.805661	0.854397	0.857159	1.06693	0.952567
39	1.56136	1.54531	0.933816	1.32304	0.918319	0.937198	1.109	1.05414	1.0133	1.03564	0.986559	0.98807	0.557553	0.568392	1.09215	0.804989	0.857591	0.858317	1.06815	0.950486
39.33	1.55122	1.52733	0.939345	1.33135	0.919508	0.942834	1.13212	1.08891	0.985809	1.01188	0.964286	0.981253	0.552274	0.562948	1.08837	0.79948	0.858636	0.862947	1.07171	0.956856
39.67	1.55061	1.52752	0.937719	1.32776	0.923473	0.923913	1.09785	1.0581	1.00222	1.01584	0.978495	0.965488	0.550276	0.560751	1.09619	0.803108	0.851086	0.85687	1.06858	0.953261
40	1.53906	1.52345	0.941377	1.34437	0.905234	0.913446	1.09868	1.03169	1.02971	1.04575	0.969278	0.971453	0.548278	0.562375	1.10133	0.806378	0.852596	0.859532	1.07048	0.946764
40.33	1.54388	1.53359	0.940076	1.33894	0.894528	0.91868	1.11107	1.00924	1.02794	1.0264	0.980031	0.970601	0.549039	0.56161	1.09441	0.801451	0.848763	0.852934	1.06687	0.938312
40.67	1.54629	1.53587	0.943979	1.34038	0.907216	0.930757	1.12717	1.03653	1.01685	1.03212	0.965054	0.959949	0.546709	0.559222	1.10181	0.802168	0.856604	0.864394	1.08152	0.95345
41	1.55061	1.53865	0.920807	1.32725	0.914354	0.927134	1.10487	1.05502	1.00931	1.01496	0.983487	0.954836	0.547707	0.561037	1.08297	0.791463	0.850854	0.860053	1.07508	0.951116
41.33	1.56869	1.562	0.927799	1.32592	0.904441	0.937198	1.13377	1.10035	1.02395	1.01892	0.967742	0.983383	0.545186	0.562566	1.08454	0.789761	0.85852	0.863121	1.08605	0.956478
41.67	1.58295	1.5468	0.931377	1.33135	0.931007	0.927939	1.13047	1.03653	1.01685	1.03652	0.980415	0.991905	0.548421	0.561897	1.08365	0.789806	0.85428	0.859822	1.0768	0.946764
42	1.5481	1.52941	0.937068	1.34243	0.917526	0.957327	1.12056	1.09595	1.01286	1.03828	0.961982	0.975714	0.543427	0.55607	1.09792	0.796793	0.853119	0.857449	1.07704	0.955343
42.33	1.56889	1.55008	0.933978	1.34171	0.923077	0.935588	1.12675	1.05898	1.01641	1.0264	0.971582	0.974862	0.545424	0.557455	1.09708	0.798988	0.851202	0.859359	1.08703	0.945944
42.67	1.56317	1.54084	0.947557	1.35883	0.916336	0.930757	1.12964	1.05942	1.0204	1.01936	0.973502	0.981253	0.539574	0.556978	1.10658	0.806064	0.857242	0.85959	1.09101	0.956667
43	1.55563	1.53637	0.938288	1.34243	0.911578	0.927536	1.1346	1.07482	1.01596	1.04927	0.977727	0.991905	0.537671	0.554638	1.09834	0.797913	0.849518	0.855365	1.07778	0.94626
43.33	1.56045	1.5465	0.933572	1.35258	0.91594	0.933172	1.12304	1.07879	1.01907	1.02992	0.966974	0.971879	0.5371	0.557121	1.10102	0.794688	0.852828	0.855018	1.07955	0.948909
43.67	1.56708	1.54601	0.937475	1.36037	0.902855	0.925926	1.11519	1.0713	1.01242	1.02464	0.988479	0.987218	0.537196	0.555115	1.10013	0.796569	0.848879	0.852819	1.07931	0.944746
44	1.56728	1.54889	0.934141	1.35268	0.912371	0.919887	1.12758	1.08891	1.04169	1.0352	0.976575	0.985087	0.536577	0.552632	1.10432	0.794509	0.84975	0.854729	1.07667	0.948341
44.33	1.5718	1.55386	0.937149	1.35012	0.902458	0.937601	1.12552	1.07879	1.0235	1.01452	0.973502	0.971879	0.536815	0.553014	1.10632	0.799122	0.847253	0.852182	1.07906	0.9438
44.67	1.57009	1.54809	0.943247	1.34776	0.912371	0.94686	1.12304	1.09023	1.02306	1.02244	0.980031	0.991905	0.53301	0.553635	1.10574	0.792269	0.848414	0.854613	1.08133	0.947143
45	1.57341	1.54442	0.932759	1.33966	0.924266	0.92351	1.14286	1.07526	1.01863	1.02684	0.950845	0.96634	0.532677	0.552393	1.09005	0.783625	0.855326	0.858201	1.09065	0.952883
45.33	1.5959	1.57363	0.945687	1.37688	0.918715	0.925926	1.13584	1.05238	1.0306	1.04311	0.99232	1.01534	0.5371	0.556978	1.11372	0.797734	0.849576	0.857912	1.0825	0.945881
45.67	1.57973	1.55455	0.935198	1.36335	0.911578	0.927134	1.13501	1.09419	1.01774	1.02288	0.980799	0.97614	0.531583	0.550912	1.10595	0.794733	0.849402	0.854266	1.07919	0.95036
46	1.5947	1.56141	0.936092	1.37114	0.900476	0.935185	1.13501	1.04489	1.03016	1.02552	0.980799	0.98807	0.532059	0.551629	1.10836	0.791463	0.847776	0.853397	1.0847	0.945124
46.33	1.5726	1.57164	0.938125	1.36632	0.899286	0.931159	1.14451	1.03125	1.04213	1.04311	0.995392	0.993609	0.530251	0.550387	1.10826	0.790747	0.847601	0.852876	1.08354	0.942223
46.67	1.58044	1.56121	0.935035	1.37258	0.903648	0.93599	1.13749	1.04754	1.0408	1.02112	0.989247	0.986366	0.530251	0.550578	1.10884	0.790791	0.849286	0.852008	1.08299	0.943989
47	1.57994	1.56826	0.934548	1.38058	0.912371	0.931159	1.12964	1.09507	1.02483	1.03344	0.982719	0.985513	0.527588	0.547426	1.10669	0.790433	0.848066	0.856175	1.08323	0.950044
47.33	1.60484	1.56846	0.93593	1.36796	0.909199	0.929147	1.13873	1.04577	1.00843	1.0396	0.987327	0.974435	0.528253	0.548763	1.11025	0.787119	0.845859	0.855018	1.08482	0.941024
47.67	1.60082	1.57045	0.937881	1.36396	0.908803	0.94686	1.10198	1.06514	1.04213	1.04971	1.00691	1.0017	0.524781	0.549479	1.10868	0.786805	0.84824	0.853918	1.08121	0.946386
48	1.58215	1.57045	0.935848	1.37791	0.913957	0.918277	1.12345	1.0669	1.02971	1.04004	0.980415	0.967192	0.525352	0.549097	1.10768	0.788015	0.846324	0.851024	1.08213	0.943926
48.33	1.5949	1.57919	0.94032	1.36683	0.885012	0.920692	1.10611	1.05678	1.03282	1.02464	0.970814	0.996165	0.528919	0.552536	1.11015	0.78573	0.846614	0.85143	1.08513	0.945881
48.67	1.60213	1.57601	0.93845	1.37976	0.900476	0.927134	1.08877	1.01805	1.01996	1.04136	0.983487	0.975714	0.525257	0.548572	1.10831	0.785327	0.835869	0.846394	1.07171	0.932761
49	1.5953	1.58973	0.941377	1.38899	0.926646	0.936795	1.11808	1.01761	1.03636	1.04399	0.990015	0.968896	0.522974	0.546614	1.10758	0.787208	0.849692	0.855249	1.08599	0.938375
49.33	1.61187	1.58804	0.936905	1.37206	0.927042	0.933575	1.12923	1.0625	1.02927	1.06115	0.978879	0.96634	0.521404	0.546423	1.11057	0.783446	0.852073	0.859937	1.10248	0.952189
49.67	1.59158	1.58058	0.938125	1.37453	0.893339	0.936795	1.12428	1.04049	1.04523	1.04004	0.97427	0.995313	0.521024	0.545802	1.11351	0.783356	0.84644	0.852529	1.08746	0.942854
50	1.60233	1.58158	0.938369	1.3855	0.899286	0.931159	1.13047	1.03697	1.04257	1.0374	0.973502	0.976992	0.519264	0.543653	1.11928	0.78152	0.846033	0.853976	1.08918	0.939132
50.33	1.60243	1.57909	0.933572	1.38786	0.919905	0.926329	1.13419	1.0154	1.0408	1.03124	0.991551	0.989348	0.519692	0.544703	1.11246	0.785058	0.847659	0.854497	1.08813	0.944998
50.67	1.60584	1.57353	0.946662	1.38396	0.929818	0.943237	1.14492	1.07438	1.04124	1.02552	0.985407	0.991478	0.514269	0.538972	1.1112	0.781386	0.851144	0.859127	1.09812	0.952378
51	1.60645	1.5782	0.927555	1.38868	0.911975	0.922705	1.14905	1.0625	1.04124	1.04971	0.975422	0.971027	0.518883	0.546327	1.11151	0.783894	0.847311	0.853397	1.09616	0.946512
51.33	1.62573	1.61159	0.932759	1.39227	0.90563	0.915056	1.13584	1.07174	1.03282	1.0286	0.982719	0.994887	0.522879	0.548811	1.10753	0.776593	0.846324	0.85415	1.09451	0.9479
51.67	1.60283	1.58833	0.9378	1.39606	0.891753	0.952899	1.13088	1.03477	1.05366	1.0352	0.988479	0.990626	0.510322	0.535916	1.11975	0.784476	0.84673	0.853282	1.09531	0.941907
52	1.60996	1.59062	0.935767	1.38591	0.910785	0.929549	1.1441	1.08011	1.02705	1.0308	0.991167	0.974862	0.515554	0.544226	1.10962	0.779236	0.848995	0.851893	1.09341	0.94771
52.33	1.63567	1.59042	0.933816	1.38488	0.90682	0.942432	1.13832	1.06162	1.051	1.05147	0.99616	0.995739	0.516172	0.54308	1.11251	0.777041	0.848298	0.855539	1.09506	0.944998
52.67	1.618	1.58615	0.946744	1.40078	0.910785	0.924718	1.18456	1.07658	1.04523	1.05411	0.993856	1.00213	0.513699	0.541551	1.11288	0.776414	0.846556	0.853687	1.09684	0.945124
53	1.60815	1.58337	0.920969	1.37781	0.916733	0.941626	1.154	1.08099	1.04346	1.05719	0.987711	0.979548	0.51132	0.547426	1.10044	0.770995	0.854455	0.860864	1.10419	0.956226
53.33	1.62673	1.5783	0.927636	1.37637	0.912371	0.915056	1.13749	1.08803	1.05543	1.06379	0.989247	0.998722	0.512272	0.541886	1.10516	0.770726	0.847137	0.854266	1.09947	0.946575
53.67	1.62302	1.58933	0.929994	1.39791	0.920301	0.926329	1.13914	1.09903	1.05942	1.05147	0.985407	0.984661	0.51308	0.539736	1.11697	0.773816	0.847776	0.852066	1.09187	0.944809
54	1.64019	1.61735	0.924709	1.37955	0.920301	0.905797	1.14121	1.07262	1.04035	1.03608	0.977343	0.984235	0.512747	0.545085	1.10333	0.764545	0.847892	0.849114	1.09488	0.941781
54.33	1.63266	1.59251	0.924059	1.38888	0.910389	0.9219	1.12469	1.07746	1.03902	1.0352	0.993472	0.980827	0.512414	0.541265	1.10112	0.765307	0.845104	0.852529	1.09745	0.943043
54.67	1.62462	1.5939	0.936255	1.40632	0.912768	0.932367	1.14575	1.08583	1.03415	1.03476	0.987327	0.987644	0.51132	0.541599	1.11676	0.772697	0.846207	0.854381	1.0996	0.950486
55	1.63366	1.60642	0.93406	1.40109	0.904837	0.927536	1.12056	1.07086	1.0439	1.05895	0.988863	0.991052	0.506897	0.539593	1.11482	0.770636	0.844407	0.853397	1.09837	0.948909
55.33	1.63205	1.60423	0.927311	1.4097	0.901269	0.935588	1.15566	1.08275	1.04523	1.04223	0.997696	0.987218	0.508229	0.537253	1.11666	0.773861	0.843013	0.852819	1.09377	0.94954
55.67	1.64893	1.6253	0.914952	1.3775	0.902062	0.921095	1.12923	1.08495	1.02439	1.05543	0.987327	0.993183	0.511511	0.543175	1.10669	0.7645	0.844755	0.852876	1.09727	0.943106
56	1.63165	1.61308	0.933653	1.41093	0.902062	0.936795	1.19405	1.09639	1.04435	1.05763	0.989247	0.99787	0.509132	0.541838	1.12238	0.772114	0.848879	0.86231	1.1053	0.955973
56.33	1.63366	1.59221	0.933897	1.41216	0.897304	0.923913	1.1474	1.06998	1.04834	1.04136	0.996544	0.985513	0.507515	0.539689	1.11618	0.76992	0.844523	0.851661	1.10101	0.940646
56.67	1.65706	1.60761	0.927067	1.40191	0.909199	0.931159	1.14162	1.05722	1.03282	1.05367	0.991551	0.980827	0.506849	0.541265	1.11897	0.770995	0.846324	0.851314	1.10174	0.941718
57	1.6664	1.61874	0.934548	1.41555	0.909199	0.925121	1.14657	1.09155	1.04523	1.03916	0.986943	0.985087	0.508276	0.540548	1.12552	0.771801	0.843826	0.85334	1.09861	0.94544
57.33	1.64662	1.61278	0.926986	1.42026	0.887391	0.9219	1.11561	1.00572	1.05721	1.05147	0.993088	0.991905	0.504091	0.53816	1.14646	0.770681	0.833082	0.843211	1.08666	0.932131
57.67	1.643	1.62033	0.934222	1.41483	0.888977	0.931965	1.13336	1.03741	1.04612	1.06863	0.985023	0.981253	0.503139	0.539832	1.13639	0.767277	0.84191	0.851835	1.10137	0.936924
58	1.65495	1.61447	0.916823	1.40755	0.898097	0.913043	1.12634	0.988996	1.04568	1.05939	1.01959	0.973583	0.504281	0.535916	1.10774	0.761231	0.833953	0.840954	1.08685	0.92084
58.33	1.67092	1.63076	0.926417	1.43247	0.915543	0.927134	1.173	1.03653	1.04745	1.06951	1.00538	0.991905	0.507277	0.544608	1.12038	0.767053	0.846556	0.85606	1.10756	0.943295
58.67	1.66871	1.63464	0.938694	1.41544	0.904441	0.927939	1.14368	1.04357	1.05011	1.05499	0.992704	0.991478	0.507753	0.541838	1.13571	0.770054	0.843129	0.852703	1.10143	0.940204
59	1.66238	1.62023	0.924628	1.41616	0.907216	0.913043	1.14616	1.04754	1.0408	1.06159	1.00422	0.984661	0.501189	0.536202	1.12385	0.766068	0.841793	0.852298	1.09996	0.935095
59.33	1.65666	1.61864	0.930157	1.41278	0.906027	0.933977	1.13543	1.03169	1.07095	1.06643	0.993472	0.986792	0.499905	0.536871	1.12112	0.763829	0.84371	0.853282	1.10358	0.934464
59.67	1.64852	1.62053	0.9291	1.40796	0.910389	0.947665	1.13955	1.01893	1.0408	1.04223	0.993472	0.983383	0.499762	0.536202	1.12337	0.764366	0.842084	0.850041	1.10119	0.936735
60	1.66027	1.61556	0.926661	1.43165	0.901665	0.94525	1.13832	1.05458	1.04169	1.07215	1.00038	0.964636	0.499524	0.538065	1.12626	0.76889	0.843071	0.850793	1.10523	0.942917
60.33	1.68478	1.63603	0.931539	1.42457	0.902855	0.924316	1.14905	1.06206	1.05765	1.07127	1.00307	0.991478	0.500809	0.541169	1.14463	0.763739	0.840574	0.853282	1.10248	0.942664
60.67	1.66479	1.64706	0.926092	1.42283	0.887391	0.93438	1.14038	1.06866	1.03237	1.06159	0.996544	1.00213	0.498906	0.535868	1.12563	0.764948	0.839528	0.854034	1.10199	0.942664
61	1.65947	1.63146	0.927555	1.42067	0.91475	0.929549	1.15194	1.08187	1.03858	1.05059	0.982719	0.977418	0.495862	0.536011	1.12836	0.763694	0.84191	0.85195	1.10707	0.946764
61.33	1.63888	1.60711	0.919668	1.40211	0.917129	0.942029	1.14038	1.06206	1.05366	1.06599	1.0023	0.985087	0.490677	0.528608	1.11618	0.756797	0.841561	0.852529	1.10205	0.941655
61.67	1.67986	1.64825	0.921457	1.41514	0.890563	0.919887	1.1346	1.06162	1.0541	1.07567	0.999616	0.988496	0.498763	0.541121	1.12867	0.763784	0.840167	0.850388	1.10254	0.940394
62	1.6672	1.62937	0.929344	1.4256	0.908406	0.929147	1.14327	1.04093	1.05765	1.06291	1.00192	0.98807	0.495291	0.533145	1.12668	0.76253	0.840516	0.853976	1.10548	0.941087
62.33	1.68227	1.63255	0.935848	1.43749	0.902855	0.925926	1.14946	1.05062	1.05543	1.04619	1.00077	0.973583	0.497146	0.534578	1.12799	0.761141	0.840283	0.849635	1.10677	0.944241
62.67	1.66871	1.64438	0.931133	1.43462	0.900872	0.942834	1.13254	1.05018	1.05676	1.07391	0.995392	0.991478	0.494292	0.534722	1.12479	0.761992	0.838831	0.852876	1.10664	0.938186
63	1.66248	1.63931	0.925197	1.42765	0.901269	0.923913	1.15235	1.06514	1.05632	1.08579	1.01613	0.985087	0.49277	0.533671	1.14342	0.761365	0.840806	0.850156	1.10542	0.942034
63.33	1.66329	1.63494	0.920807	1.41298	0.900872	0.928744	1.13254	1.05678	1.05188	1.07083	0.979263	0.962505	0.492532	0.532429	1.12253	0.756528	0.838773	0.850619	1.10652	0.94197
63.67	1.66911	1.6399	0.93406	1.4376	0.888977	0.916264	1.13914	1.07438	1.05765	1.06863	1.00576	0.995313	0.493912	0.537539	1.13544	0.764859	0.840109	0.852529	1.10805	0.939952
64	1.66941	1.62778	0.912351	1.41175	0.906027	0.915056	1.13625	1.07835	1.0612	1.05323	1.00883	0.981253	0.490344	0.532525	1.12012	0.751332	0.837438	0.849057	1.10315	0.935663
64.33	1.65555	1.63831	0.92601	1.45739	0.887787	0.931159	1.13419	1.07835	1.04523	1.05147	0.990399	0.979974	0.489726	0.534865	1.13282	0.761231	0.841503	0.850561	1.114	0.939384
64.67	1.67624	1.64239	0.923815	1.43678	0.921094	0.940821	1.1602	1.06778	1.06208	1.04575	0.995008	0.985939	0.489488	0.531665	1.13156	0.759842	0.84342	0.854844	1.11823	0.942223
65	1.66178	1.63802	0.929181	1.43339	0.906027	0.929549	1.13501	1.08231	1.04523	1.05939	1.00461	0.98807	0.490297	0.533766	1.15266	0.757065	0.840167	0.849693	1.10799	0.947143
65.33	1.68357	1.64597	0.931946	1.4657	0.92268	0.93277	1.13708	1.05634	1.03636	1.05367	0.979647	0.962079	0.48868	0.532477	1.13791	0.766829	0.838018	0.849867	1.10995	0.929482
65.67	1.67815	1.64924	0.933247	1.44436	0.906027	0.938808	1.16061	1.04974	1.06962	1.08535	1.0119	1.00511	0.486587	0.532525	1.13161	0.756797	0.838599	0.850504	1.11008	0.934401
66	1.68006	1.63782	0.925035	1.43185	0.915147	0.942834	1.14121	1.0647	1.06563	1.05279	1.01114	0.973583	0.48535	0.533193	1.12463	0.758543	0.83918	0.84732	1.11173	0.938123
66.33	1.66951	1.63871	0.923571	1.43421	0.909199	0.950483	1.13625	1.09111	1.06741	1.06423	1.0169	1.00895	0.487015	0.532763	1.13319	0.755901	0.839006	0.85143	1.10842	0.937934
66.67	1.67996	1.64408	0.939019	1.44949	0.923077	0.931965	1.15566	1.08979	1.04878	1.06027	1.01767	0.982105	0.485731	0.531426	1.1314	0.754423	0.8422	0.855249	1.11786	0.944935
67	1.67885	1.64388	0.926498	1.46682	0.898493	0.929147	1.14781	1.05634	1.05277	1.06863	0.982335	0.976992	0.487158	0.532477	1.13744	0.755453	0.837438	0.850793	1.11486	0.938186
67.33	1.67765	1.64199	0.92162	1.46098	0.889374	0.931965	1.14575	1.0603	1.08204	1.06335	1.00269	0.978696	0.483447	0.529993	1.1737	0.756214	0.83012	0.844079	1.10113	0.92986
67.67	1.67373	1.63971	0.931946	1.45329	0.883822	0.930354	1.14121	1.05766	1.06031	1.06379	1.01767	1.00383	0.48321	0.530757	1.13985	0.756483	0.840225	0.851603	1.11277	0.943169
68	1.70496	1.6723	0.928287	1.454	0.895321	0.934783	1.14203	1.05282	1.06652	1.05235	1.00614	0.992757	0.487205	0.535772	1.1366	0.754871	0.835753	0.849114	1.11547	0.937114
68.33	1.66831	1.66783	0.934466	1.44529	0.911578	0.933575	1.14946	1.06998	1.05676	1.06467	1.00614	0.977418	0.484066	0.530949	1.1356	0.75402	0.836044	0.851314	1.11541	0.942538
68.67	1.68678	1.64865	0.933409	1.44365	0.911182	0.915862	1.15277	1.05678	1.07672	1.06511	1.01344	1	0.482639	0.533337	1.13298	0.749899	0.838251	0.851603	1.11486	0.934591
69	1.67483	1.62629	0.921945	1.4498	0.908406	0.937601	1.154	1.0779	1.04922	1.07875	1.01459	1.00213	0.477074	0.522829	1.15496	0.755095	0.836973	0.850735	1.11835	0.93888
69.33	1.68809	1.6569	0.932596	1.47246	0.915147	0.948068	1.16391	1.08451	1.04523	1.07567	1.01382	0.982957	0.480879	0.527796	1.13822	0.754289	0.8422	0.859822	1.12515	0.942412
69.67	1.67724	1.63682	0.932759	1.454	0.891753	0.926329	1.15855	1.09507	1.05854	1.07743	1.02842	1.01704	0.475932	0.524787	1.14074	0.760335	0.838135	0.851372	1.1162	0.945124
70	1.67865	1.65868	0.92105	1.45483	0.887787	0.922705	1.17878	1.03521	1.07317	1.07655	1.00461	0.969749	0.478406	0.530566	1.13361	0.747122	0.82861	0.847899	1.10928	0.924435
70.33	1.69191	1.65044	0.931051	1.4577	0.880254	0.92351	1.16887	1.02465	1.06829	1.06423	1.00614	1.00852	0.480736	0.528465	1.14116	0.750616	0.826519	0.842227	1.10934	0.928409
70.67	1.70366	1.65113	0.930726	1.47503	0.895321	0.927536	1.16144	1.07879	1.07805	1.07215	0.996544	0.994035	0.478881	0.527558	1.13996	0.751019	0.836334	0.851372	1.11976	0.943737
71	1.67996	1.65421	0.933978	1.45277	0.904441	0.928341	1.18951	1.07086	1.06608	1.08535	1.0073	0.974435	0.477264	0.527844	1.1419	0.750571	0.841038	0.854208	1.12417	0.94052
71.33	1.68387	1.66425	0.928206	1.47052	0.894132	0.944042	1.16061	1.02157	1.05632	1.07963	1.01344	0.987218	0.476598	0.529516	1.1473	0.756259	0.83465	0.852587	1.11804	0.933708
71.67	1.69984	1.66435	0.929669	1.45575	0.920301	0.910628	1.17547	1.04137	1.08426	1.06643	1.00653	0.974009	0.474838	0.526364	1.14447	0.750795	0.836566	0.851545	1.11792	0.933581
72	1.69944	1.65958	0.930482	1.47452	0.888977	0.929549	1.15813	0.994718	1.05765	1.06467	1.02304	1.01193	0.477359	0.529993	1.14137	0.749765	0.827913	0.844079	1.11283	0.921219
72.33	1.68227	1.66087	0.929263	1.47564	0.900079	0.927536	1.17217	1.02289	1.06297	1.08491	1.00461	0.982957	0.476218	0.529134	1.14741	0.747973	0.828726	0.844253	1.11424	0.923552
72.67	1.70044	1.66475	0.932515	1.47934	0.905234	0.922705	1.17011	1.05854	1.03326	1.06379	1.00384	0.990626	0.475266	0.531044	1.14951	0.748959	0.836508	0.851024	1.1224	0.936735
73	1.70295	1.66206	0.935035	1.4657	0.912371	0.935588	1.17217	1.02905	1.06829	1.07083	1.01037	0.982957	0.474458	0.526841	1.14547	0.751512	0.835289	0.852124	1.12276	0.930302
73.33	1.68237	1.65401	0.928368	1.48364	0.913957	0.928744	1.15813	1.02069	1.05898	1.05895	1.01152	1.00937	0.469083	0.522686	1.14379	0.746674	0.834534	0.85033	1.12056	0.936104
73.67	1.70345	1.66395	0.912838	1.45359	0.908406	0.938406	1.14533	1.07174	1.05277	1.08755	0.996544	1.00597	0.473031	0.52665	1.13334	0.74121	0.837902	0.848883	1.12209	0.939384
74	1.69653	1.66812	0.925848	1.46508	0.906423	0.940419	1.17506	1.0713	1.06475	1.07127	1.01267	1.01278	0.472936	0.530041	1.14568	0.743853	0.836276	0.851372	1.12056	0.933834
74.33	1.70406	1.6725	0.932921	1.48385	0.896907	0.933575	1.18291	1.02993	1.07361	1.08667	1.03571	0.984235	0.470938	0.528178	1.15208	0.750571	0.827564	0.843269	1.11437	0.920588
74.67	1.70657	1.66902	0.941784	1.48508	0.902855	0.94847	1.14864	1.03917	1.0541	1.06775	1.01575	0.98807	0.471271	0.527223	1.14945	0.749899	0.837496	0.851487	1.12307	0.933771
75	1.67373	1.65193	0.927067	1.46549	0.89889	0.920692	1.17506	1.03169	1.06962	1.05147	1.01114	0.986792	0.466562	0.521731	1.14447	0.742643	0.827855	0.843674	1.11118	0.922922
75.33	1.72625	1.68979	0.913814	1.45944	0.905234	0.922303	1.15772	1.0779	1.05809	1.05411	1.00461	0.975714	0.473792	0.532381	1.13681	0.737761	0.833314	0.85224	1.12227	0.934528
75.67	1.71159	1.6569	0.932271	1.47411	0.913561	0.923108	1.16722	1.05986	1.05632	1.07787	1.00346	1.00043	0.465706	0.522447	1.14384	0.746271	0.834882	0.852413	1.12466	0.931121
76	1.69562	1.66683	0.924547	1.46149	0.907613	0.936795	1.17795	1.07306	1.06962	1.08623	1.01075	1.00085	0.466086	0.522447	1.14888	0.74542	0.835231	0.853976	1.12711	0.93396
76.33	1.71932	1.66037	0.929181	1.47226	0.899286	0.929952	1.18621	1.06822	1.06829	1.07875	0.999232	0.974435	0.467038	0.521874	1.15014	0.743405	0.835056	0.853629	1.12957	0.935978
76.67	1.71942	1.68114	0.923083	1.48334	0.916336	0.931965	1.19034	1.05898	1.07228	1.07171	1.00998	0.977418	0.468655	0.526937	1.14473	0.74551	0.835753	0.852992	1.14072	0.933266
77	1.71711	1.68104	0.926905	1.45318	0.902855	0.927939	1.19488	1.08407	1.07894	1.08447	1.00576	0.981679	0.467894	0.526602	1.13466	0.733238	0.835405	0.851893	1.13257	0.94052
77.33	1.71731	1.6868	0.931133	1.48898	0.904441	0.94847	1.19818	1.05546	1.06208	1.04575	1.00614	0.995739	0.468179	0.526793	1.16577	0.740897	0.834359	0.851661	1.12736	0.933329
77.67	1.71962	1.67597	0.930807	1.47944	0.909596	0.929549	1.1858	1.0493	1.07849	1.07655	1.02304	1.00895	0.466134	0.527367	1.14835	0.739911	0.832733	0.849983	1.12883	0.926958
78	1.72073	1.69853	0.92601	1.49656	0.906423	0.931159	1.21222	1.06118	1.0745	1.08227	1.00077	1.02343	0.469987	0.529516	1.14893	0.739284	0.839296	0.858317	1.13582	0.936861
78.33	1.72585	1.67965	0.926254	1.47698	0.904044	0.932367	1.17547	1.02773	1.0745	1.09107	1.02688	0.987644	0.466514	0.527223	1.14767	0.74027	0.833314	0.851603	1.12797	0.922228
78.67	1.72063	1.68899	0.923083	1.48887	0.903648	0.929549	1.1763	1.00132	1.09047	1.09723	1.0169	1.00554	0.465325	0.526411	1.15061	0.741927	0.834824	0.853166	1.13018	0.920462
79	1.73137	1.68353	0.919668	1.46754	0.8977	0.931159	1.15896	1.09155	1.06608	1.08403	0.996928	0.987218	0.465516	0.528322	1.1378	0.731805	0.836508	0.852008	1.13116	0.935095
79.33	1.72103	1.69108	0.923327	1.48559	0.904837	0.942029	1.19612	1.02949	1.05809	1.07259	1.00269	1.00256	0.464992	0.526268	1.15208	0.736463	0.836973	0.854671	1.13373	0.931563
79.67	1.74453	1.70588	0.926742	1.4861	0.898097	0.940016	1.16928	1.00748	1.07273	1.06731	1.00922	0.987644	0.467751	0.532429	1.15098	0.737538	0.834766	0.852298	1.13122	0.916488
80	1.73358	1.69366	0.930889	1.48416	0.906423	0.929952	1.19323	1.02025	1.07051	1.06687	1.02112	1.01065	0.466752	0.526316	1.16168	0.74027	0.838483	0.857159	1.14103	0.925886
80.33	1.70797	1.67498	0.931214	1.4819	0.918715	0.940821	1.16763	1.0603	1.06918	1.07391	1.00538	0.991052	0.461092	0.521588	1.1504	0.738702	0.842142	0.857912	1.14115	0.935348
80.67	1.72655	1.68561	0.930807	1.49431	0.899286	0.94525	1.19529	1.00352	1.0612	1.06159	1.01229	0.971027	0.464992	0.526029	1.15035	0.736373	0.837321	0.856754	1.13999	0.92576
81	1.75397	1.70847	0.923408	1.50959	0.905234	0.929952	1.15731	1.09023	1.06652	1.09283	1.01306	1.00639	0.465611	0.531187	1.15701	0.735477	0.837786	0.848651	1.12595	0.933329
81.33	1.7372	1.67428	0.933572	1.49769	0.898097	0.952899	1.18126	1.03477	1.07938	1.08183	1.02112	0.9902	0.459951	0.521253	1.15344	0.737493	0.835521	0.857565	1.13594	0.929734
81.67	1.74242	1.688	0.926092	1.49318	0.899683	0.931965	1.15359	0.989437	1.08293	1.08095	1.01613	0.997017	0.46328	0.524644	1.15685	0.735208	0.830062	0.850098	1.13134	0.917623
82	1.7144	1.68084	0.922595	1.49144	0.917922	0.952093	1.19736	1.06118	1.08071	1.09371	1.02496	0.997444	0.457287	0.520155	1.15601	0.735298	0.838541	0.858548	1.13919	0.933581
82.33	1.72605	1.69803	0.932921	1.50067	0.904837	0.951691	1.16846	1.06514	1.06741	1.07875	1.00806	1.01278	0.462852	0.52665	1.16053	0.737985	0.828029	0.851256	1.1284	0.931689
82.67	1.72575	1.69585	0.925035	1.50087	0.888977	0.926731	1.16804	1.03565	1.06652	1.08447	1.00653	0.981679	0.459855	0.524596	1.15239	0.733327	0.824138	0.843211	1.11663	0.921849
83	1.73047	1.70737	0.929425	1.49913	0.893735	0.945652	1.15979	1.00528	1.06297	1.09063	1.01805	0.990626	0.461615	0.526268	1.16294	0.735746	0.824021	0.84379	1.12031	0.915542
83.33	1.74895	1.71016	0.918286	1.48364	0.887391	0.945652	1.17506	1.01673	1.08514	1.09063	1.00307	0.98807	0.459522	0.526316	1.14415	0.727326	0.831455	0.848999	1.12877	0.919389
83.67	1.74392	1.69803	0.933572	1.51656	0.906027	0.941224	1.15979	1.07746	1.07406	1.09019	1.01843	0.995313	0.460616	0.526937	1.16278	0.737493	0.829597	0.849751	1.13759	0.92904
84	1.72776	1.67727	0.932352	1.50661	0.892942	0.926329	1.14616	1.03213	1.0878	1.09019	1.03264	0.999148	0.454909	0.521444	1.16184	0.734895	0.826054	0.848999	1.12442	0.927715
84.33	1.72826	1.69475	0.92788	1.49636	0.893339	0.93438	1.15524	1.00132	1.07007	1.09371	1.04186	0.987218	0.459142	0.524979	1.15528	0.732208	0.833198	0.852587	1.13318	0.920588
84.67	1.7386	1.70499	0.922514	1.49451	0.886994	0.914251	1.15153	1.02949	1.07007	1.09679	1.01651	0.980827	0.458476	0.525934	1.15727	0.730685	0.822279	0.842459	1.1197	0.912577
85	1.75668	1.71075	0.924872	1.50733	0.905234	0.93438	1.17093	1.0713	1.07982	1.09371	1.0192	1.00128	0.461568	0.530232	1.15885	0.731357	0.830759	0.84952	1.13042	0.925508
85.33	1.7381	1.69644	0.922189	1.50785	0.895718	0.942029	1.15524	1.04269	1.07317	1.10075	1.01459	0.995739	0.456526	0.524835	1.15843	0.73055	0.831339	0.852356	1.13024	0.925949
85.67	1.7618	1.70747	0.93162	1.5263	0.894925	0.927536	1.18291	1.07218	1.08115	1.07875	1.01344	0.991478	0.45762	0.529325	1.15806	0.731625	0.82919	0.849693	1.1319	0.92986
86	1.72685	1.68392	0.937149	1.51328	0.907216	0.922705	1.1635	1.04225	1.06341	1.07919	1.00192	0.992331	0.450438	0.519295	1.16488	0.736104	0.831049	0.849693	1.13226	0.923931
86.33	1.75979	1.71681	0.920481	1.50272	0.90682	0.941224	1.17176	1.08231	1.08559	1.08843	1.01613	0.997444	0.456478	0.524119	1.16635	0.727774	0.833721	0.858722	1.13557	0.936041
86.67	1.74945	1.71373	0.920725	1.53102	0.892942	0.939211	1.16763	1.04974	1.08559	1.09723	1.02765	1.01363	0.455479	0.523211	1.15622	0.729162	0.828784	0.850735	1.12981	0.926832
87	1.75839	1.70409	0.927962	1.49421	0.900476	0.937601	1.17052	1.03433	1.08381	1.10999	1.02765	1.00597	0.454433	0.526173	1.1588	0.729117	0.828435	0.849751	1.13263	0.922985
87.33	1.74433	1.71721	0.924628	1.50826	0.894132	0.926731	1.17217	1.02817	1.08426	1.10031	1.01382	1.01619	0.455765	0.522782	1.16326	0.730371	0.828145	0.854497	1.13294	0.925634
87.67	1.75427	1.71105	0.927799	1.50774	0.887391	0.938406	1.16102	1.04489	1.06962	1.07743	1.00883	0.998296	0.455194	0.526268	1.15853	0.731894	0.833721	0.848825	1.13049	0.919642
88	1.7611	1.72794	0.928043	1.49882	0.8977	0.931159	1.154	1.03433	1.07982	1.11351	1.03111	1.0196	0.457763	0.529707	1.15738	0.725937	0.827274	0.85143	1.13171	0.918948
88.33	1.74744	1.72019	0.928043	1.52651	0.899683	0.925121	1.15813	1.0581	1.09623	1.11307	1.03533	0.98807	0.45429	0.526077	1.16063	0.725579	0.820362	0.841475	1.1197	0.920588
88.67	1.75005	1.72417	0.922839	1.50969	0.906027	0.940016	1.20396	1.05326	1.07982	1.08139	1.01229	0.997444	0.454338	0.526173	1.16131	0.731581	0.835695	0.859995	1.1447	0.923489
89	1.76632	1.7339	0.930726	1.50354	0.900872	0.9219	1.18538	1.06426	1.07228	1.08447	1.02688	0.990626	0.456669	0.528799	1.16105	0.726116	0.831862	0.852761	1.13729	0.924562
89.33	1.77777	1.72079	0.936092	1.51164	0.898097	0.937601	1.1924	1.02333	1.08869	1.1311	1.01382	0.997017	0.453767	0.526889	1.16625	0.730595	0.825996	0.850735	1.13619	0.915605
89.67	1.7379	1.70886	0.93219	1.51308	0.909199	0.921498	1.19282	1.04533	1.09667	1.08051	1.01459	1.02429	0.44649	0.518244	1.16493	0.726654	0.826403	0.851314	1.14029	0.92412
