# Supplementary material for: Real-time monitoring of peptidoglycan synthesis by membrane-reconstituted penicillin-binding proteins
Source: eLife. 2021 Feb 24;10:e61525. doi: 10.7554/eLife.61525 (PMC7943195; doi:10.7554/eLife.61525)
Supplement: Figure 3—figure supplement 6—source data 1. [file elife-61525-fig3-figsupp6-data1.xlsx]

## Sheet: Fig3 - fig supp 5 panel A
time (min)	PBP1B-avg	PBP1B-stdev	Moe-avg	Moe-stdev	PBP1B+LpoP-avg	PBP1B+LpoP-stdev
0	100	0	100	0	100	0
0.333333	99.2707	0.60433	99.2161	1.57686	96.7199	2.10895
0.666667	98.7765	0.983403	99.507	0.776187	95.51	1.07971
1	97.0999	1.59614	99.3472	0.603592	93.1218	1.24923
1.33333	98.2319	2.51034	99.0215	0.767489	90.283	2.19919
1.66667	96.7846	2.81963	97.915	0.622376	90.0899	1.68194
2	97.1146	1.22694	99.0448	1.13247	87.5528	1.54118
2.33333	96.509	2.15335	98.1144	0.158471	85.4935	0.353241
2.66667	95.7439	2.12074	97.9437	1.96316	83.4724	0.971053
3	93.9339	1.55085	97.4069	1.51488	82.1835	0.813897
3.33333	94.8917	2.0247	95.8735	0.031758	81.4998	0.333408
3.66667	94.0106	2.58109	95.7247	1.66426	80.0003	1.09357
4	93.4323	2.20385	96.8971	1.31959	78.7815	1.01972
4.33333	92.9286	2.84946	97.3858	1.23845	77.7463	0.623179
4.66667	93.5676	1.62427	95.6532	1.39014	77.0156	0.19119
5	92.8342	1.50284	96.0721	1.12816	77.1231	0.392763
5.33333	92.7855	1.71889	95.8754	0.829573	75.6217	1.35229
5.66667	92.0303	1.60999	94.3713	0.935233	76.0373	0.855291
6	91.3394	2.38548	94.9939	1.25501	74.2423	0.487747
6.33333	91.8	2.64415	93.9802	2.0235	74.5116	2.0876
6.66667	91.1341	1.2585	94.438	1.82467	72.7208	1.25548
7	90.5316	1.11167	94.0469	1.33265	71.8172	1.07692
7.33333	90.1585	1.90189	93.8128	2.1373	71.5329	1.42529
7.66667	89.928	1.771	93.5223	1.46159	71.0967	0.716062
8	89.7713	1.91756	94.0456	1.08826	70.4578	0.425125
8.33333	89.6727	2.52474	92.7072	1.19698	70.0489	0.982313
8.66667	89.773	1.80849	93.8226	0.959373	69.0915	1.09193
9	89.2704	1.92376	92.9667	1.06237	70.0511	0.954572
9.33333	87.6962	1.77704	92.6574	1.62462	68.7735	1.10738
9.66667	88.8257	1.95744	92.1724	1.9141	69.4067	0.459686
10	88.5334	2.21545	92.0027	1.16583	68.6153	1.37837
10.3333	88.1267	0.827598	92.4318	0.252449	67.9603	0.387244
10.6667	86.8745	2.09813	92.7219	1.42501	67.4922	0.750413
11	87.5956	1.76552	91.9317	0.915497	67.4616	0.566985
11.3333	86.9077	2.017	90.7956	1.36834	66.0205	1.5178
11.6667	87.483	1.5433	91.6903	1.70407	66.1156	0.544452
12	86.97	1.82668	92.2016	2.3044	66.2566	0.330106
12.3333	86.0028	2.07949	91.1623	0.137879	66.3254	0.991461
12.6667	86.459	2.87301	91.3058	1.0197	65.7245	0.618906
13	86.6847	0.896439	90.3841	2.46483	65.4257	0.650619
13.3333	85.476	2.46955	91.8567	2.07869	64.718	1.37127
13.6667	85.4481	2.29631	91.6218	1.81782	65.5959	0.232229
14	85.1232	1.30361	91.1787	1.70862	65.7223	0.233253
14.3333	85.0312	1.18732	91.0944	1.06485	65.2256	0.859722
14.6667	85.1401	1.61019	90.9286	0.661567	64.4866	0.974055
15	85.5293	2.15013	90.4634	1.22624	64.296	0.777027
15.3333	83.9836	1.15306	90.8111	2.2343	63.6803	0.573585
15.6667	84.9238	2.18699	90.2168	1.46895	64.2027	0.279638
16	85.0163	1.74357	90.9885	0.791257	63.7612	0.168996
16.3333	84.2282	3.11674	90.7742	0.967782	64.0213	1.77745
16.6667	84.335	1.90138	90.1298	2.27452	63.2882	0.567945
17	84.1375	2.9455	89.7305	2.45085	63.702	0.999448
17.3333	84.8696	2.79966	90.3615	2.23826	63.2225	0.294198
17.6667	84.3756	2.57446	90.3235	1.11474	62.6933	0.854235
18	83.56	1.76411	90.0323	0.941746	62.8632	0.3845
18.3333	83.4146	1.99456	90.3304	1.46338	62.5432	0.470712
18.6667	83.9574	2.09047	90.1932	2.81798	63.2137	0.355018
19	83.5188	0.93708	89.7717	2.03629	62.3547	0.457621
19.3333	83.2263	0.647039	90.1339	1.99447	62.0385	1.39676
19.6667	83.8686	1.13491	89.2704	2.30296	62.4555	0.0902469
20	83.5285	1.05954	89.7186	1.40042	62.8594	1.2892
20.3333	83.5554	1.61843	90.0453	1.84042	61.8003	0.171053
20.6667	83.5262	1.03806	89.0373	2.76677	62.0357	0.0373498
21	83.6666	0.677315	88.7469	1.78248	61.2347	0.414905
21.3333	83.1466	1.50301	89.9044	2.51081	61.4215	0.457612
21.6667	82.6785	0.991033	89.3418	2.61681	60.8321	0.287694
22	83.099	1.95567	90.0528	2.28169	61.3289	0.344768
22.3333	83.0725	1.9329	89.319	1.84515	61.8423	0.485695
22.6667	82.7905	1.15565	88.7313	2.6144	60.5851	1.03893
23	82.1848	0.850244	89.2025	2.14271	60.2506	0.464749
23.3333	82.745	1.12817	88.7432	1.8772	60.2526	0.614972
23.6667	81.7455	1.33465	88.462	2.58152	60.3104	0.132849
24	82.3827	0.93626	87.5367	2.60063	60.6075	0.694567
24.3333	81.3591	1.41819	89.6742	1.97797	60.7776	1.11574
24.6667	81.9982	0.728949	89.6423	2.28196	60.2074	0.789867
25	82.1545	0.765476	88.1236	1.83661	59.9218	1.00177
25.3333	81.0397	1.18235	88.6821	2.12812	59.9975	0.530168
25.6667	82.443	1.31981	88.8814	2.64546	59.7074	0.774514
26	81.2539	1.05825	88.09	3.17249	60.0051	0.240542
26.3333	81.9458	2.37041	87.8996	1.94162	59.8068	0.599885
26.6667	81.6288	1.30175	88.3271	3.55144	59.449	0.637355
27	81.8662	1.26175	88.5821	2.13471	60.1115	0.269567
27.3333	81.2875	2.16325	88.6435	1.76189	58.6878	0.839167
27.6667	80.8572	1.24794	88.3379	1.78902	59.3403	0.726796
28	82.2078	1.03367	88.4052	1.60726	58.7047	0.172921
28.3333	81.2833	1.16578	87.9997	2.98037	59.535	0.676174
28.6667	81.4066	0.492052	88.9163	1.45118	58.7176	0.795721
29	80.9546	0.820226	88.6408	2.01955	58.2306	0.628882
29.3333	80.8896	0.464143	88.2376	1.99386	59.2171	0.210129
29.6667	81.073	1.56287	89.1497	1.77906	58.6552	0.766665
30	81.2254	0.658271	89.3421	1.89346	58.0162	0.569405
30.3333	81.8805	1.45115	88.2642	2.35744	57.8778	0.779045
30.6667	80.4382	0.75898	89.233	2.64943	57.3571	0.872191
31	80.4708	1.1184	87.5119	1.45969	57.9441	0.416184
31.3333	81.376	1.55747	87.9005	2.20902	58.7504	0.694281
31.6667	81.9946	0.830207	88.4291	1.26152	57.4656	0.548739
32	80.7032	1.79891	87.9543	2.85693	57.9773	1.14838
32.3333	80.7022	1.72107	88.4387	2.36172	58.2172	0.484458
32.6667	80.9042	1.28739	88.5371	2.60613	56.9154	0.227965
33	80.671	1.14307	87.0991	2.44269	57.3924	0.705592
33.3333	79.9129	1.45224	87.2959	1.44392	57.7553	1.32552
33.6667	80.0909	1.68143	87.8066	2.0302	56.8346	0.730853
34	80.7363	1.03275	87.2313	2.33011	57.0317	0.664223
34.3333	78.8958	2.14233	87.672	1.23607	58.0463	0.80785
34.6667	79.4885	2.36295	87.5263	2.99039	56.9096	0.0885071
35	79.0645	2.30339	87.6543	2.31919	56.3902	0.685677
35.3333	78.9612	1.81092	88.6842	2.57198	57.2556	0.375993
35.6667	78.0277	1.75352	87.8166	2.9361	57.257	1.35887
36	78.1083	1.91193	87.4487	2.63716	56.5691	0.547167
36.3333	78.8321	1.66449	88.2765	2.44716	56.5976	1.16864
36.6667	78.5933	2.80461	87.3569	1.63273	56.2641	1.04559
37	78.955	2.25004	86.9021	2.1875	56.7678	0.583065
37.3333	78.7636	1.64051	87.5336	1.80592	56.7916	0.50642
37.6667	78.2821	2.18745	85.8325	2.22511	56.6968	1.17543
38	78.6848	2.53807	86.9239	2.53872	56.1661	0.707822
38.3333	78.8397	2.43099	86.9588	2.7635	56.5413	0.397871
38.6667	78.8185	2.50998	86.7781	2.09597	55.9265	1.18669
39	79.0128	1.71753	86.5402	2.8545	56.5087	0.444332
39.3333	77.7033	2.16375	87.1147	2.2994	55.6729	0.620196
39.6667	78.4046	1.57298	87.271	2.16745	56.1941	1.26411
40	77.8284	1.64926	86.6797	1.62924	55.7082	1.03841
40.3333	78.5774	2.98674	87.8248	1.26697	55.6611	0.371204
40.6667	78.4791	3.40219	86.8578	1.46393	56.5769	0.432272
41	77.9342	2.09048	87.1004	2.21388	55.749	0.971649
41.3333	77.9273	2.26369	86.9871	2.78158	55.5303	0.786198
41.6667	77.745	2.25086	87.5907	3.44881	56.0147	0.928932
42	77.5517	1.28903	86.6477	2.97547	55.7463	0.722964
42.3333	77.6002	2.65183	86.0446	3.09059	55.6834	0.582436
42.6667	77.2027	1.58077	86.8744	3.3437	56.1073	1.15581
43	77.823	1.28226	87.2264	1.65102	55.4508	0.185483
43.3333	77.1466	1.56219	87.2512	2.68863	55.9394	0.565795
43.6667	77.5469	2.26836	87.2793	2.55664	55.3895	0.652917
44	76.7933	3.27046	86.8523	2.59285	54.5588	0.612304
44.3333	77.0806	1.82014	86.2914	2.65704	54.8559	1.33699
44.6667	77.1798	2.84267	85.7708	2.01419	54.4989	0.855072
45	77.6391	1.66458	86.5425	1.50967	54.6216	0.0790312
45.3333	77.377	1.84012	86.447	2.23846	54.7995	1.32499
45.6667	77.2723	2.33906	86.9859	1.2865	54.6018	0.500598
46	76.8084	2.09708	86.573	2.1037	55.2979	0.443366
46.3333	76.1971	2.0074	86.552	3.60285	54.016	0.351829
46.6667	76.9122	1.28957	85.6334	2.6417	54.9428	0.401758
47	77.8121	2.52106	85.9001	2.3001	55.0184	1.09656
47.3333	77.4487	2.21346	84.5154	3.71108	54.4395	0.817161
47.6667	77.0647	2.14016	85.6308	1.39011	54.502	1.15371
48	77.2525	2.18197	85.4837	0.687105	54.2314	0.745378
48.3333	76.6187	2.73228	86.9803	1.47518	53.4029	0.843486
48.6667	76.4585	2.16257	85.9722	2.82012	54.1659	0.882057
49	76.5545	2.83965	85.7043	2.18257	53.4167	0.983459
49.3333	77.2236	2.28306	85.9952	3.27248	54.3473	0.184416
49.6667	76.5945	2.10148	86.3391	2.81179	53.7852	0.765272
50	76.5307	2.75276	85.6156	1.38805	53.8181	1.44499
50.3333	76.5165	1.506	85.464	1.07768	53.758	1.14632
50.6667	76.5135	1.44413	85.7153	2.35991	53.8493	0.835804
51	77.3998	2.45049	86.0744	2.84085	54.3492	1.20874
51.3333	76.9171	1.58516	86.3545	2.3132	53.5733	0.764949
51.6667	76.3205	1.39509	85.4918	2.30688	53.8031	0.695843
52	76.4455	2.1969	85.7426	1.67007	53.4854	0.723277
52.3333	76.9154	1.34954	85.489	3.62921	53.8759	0.674265
52.6667	75.9589	2.38741	85.6876	2.30159	53.5335	0.550584
53	75.8685	1.40151	85.5217	2.24784	53.5741	1.21079
53.3333	76.3008	2.0089	86.3209	2.12264	52.4905	1.1582
53.6667	75.9097	2.03964	86.1026	2.48866	53.0566	0.661226
54	75.4469	1.13518	85.8766	3.11623	53.3099	1.31131
54.3333	76.5889	2.43375	84.6408	3.33638	52.4225	1.08352
54.6667	76.388	2.4135	84.4603	1.34494	51.9351	0.347985
55	76.5633	1.56208	85.8017	3.2538	52.9748	0.0339251
55.3333	76.3596	1.40347	84.4715	2.84763	53.6493	1.61677
55.6667	76.096	1.6832	85.3176	3.2966	53.2983	0.681446
56	76.419	2.0067	85.2855	1.65164	52.7021	0.642112
56.3333	75.8263	1.5554	85.1171	3.35582	52.6324	1.58926
56.6667	75.7153	2.15581	85.1371	2.21697	52.619	0.824384
57	75.4837	1.8119	85.0652	2.61937	53.3038	1.04709
57.3333	75.1732	0.93203	84.4859	1.9338	52.6831	0.806093
57.6667	75.6125	2.36575	85.239	2.87744	52.7167	0.817001
58	76.4909	2.0689	84.7097	2.15988	53.1445	0.128479
58.3333	75.0516	1.27834	84.7815	1.97052	52.9541	1.10882
58.6667	75.5356	1.59904	84.1767	2.45791	52.5896	0.386781
59	75.0991	2.57791	84.9203	2.56377	53.0557	0.665
59.3333	76.2206	1.59192	85.5159	2.25826	52.047	0.950636
59.6667	75.3694	2.41185	84.0534	2.30023	52.1051	1.27672

## Sheet: Fig3 - fig supp 5 panel B
	slope measurement	repeat1	repeat2	repeat3
AbPBP1B	100-200 sec	-0.024725	-0.0361166	-0.033048
+LpoP	100-200 sec	-0.0975278	-0.102758	-0.100985
AbPBP1B					1	0.188337
+LpoP	relative slope	3.9445	2.84518	3.05571	3.28179	0.583495
