# Supplementary material for: Real-time monitoring of peptidoglycan synthesis by membrane-reconstituted penicillin-binding proteins
Source: eLife. 2021 Feb 24;10:e61525. doi: 10.7554/eLife.61525 (PMC7943195; doi:10.7554/eLife.61525)
Supplement: Figure 4—source data 1. [file elife-61525-fig4-data1.xlsx]

## Sheet: Fig4
Fig. 3C											Fig. 3E										Figure 3 - Supplement Figure 1
					Fitting Rayleigh distribution - SLIMfast MATLAB
PBP1b		PBP1b lipid II									displacment PBP1b					displacment PBP1b+lipid II
Dcoef, um2/s	Population 1	Dcoef, um2/s	Population 1		PBP1b - Dy647	Step size P1, nm	Weight,%	Step size P1, nm	Weight		step, nm	total fit	population 1	population 2		step, nm	total fit	population 1	population 2		Readout - lateral diffusion of L-α-Phosphatidylethanolamine-N-(lissamine rhodamine B sulfonyl)
0.0106	0.00254	0.00916	0.01943		1	125	11	261	90		4.74148	0.000136166	4.55264e-05	0.000181693		0.65203	1.4637e-05	2.58884e-05	4.05254e-05		Analysis - MATLAB FRAPanaylser
0.01066	0.0026	0.00921	0.01973		2	117	5	253	95		5.67011	0.00016281	5.44137e-05	0.000217224		1.63203	3.66348e-05	6.47915e-05	0.000101426
0.01072	0.00266	0.00926	0.02003								6.59873	0.00018944	6.32854e-05	0.000252726		2.61203	5.86288e-05	0.000103676	0.000162305		PBP1b ratio to phospholipids	Av Dcoef um2/s	SD	Immobile fraction, %	SD
0.01078	0.00272	0.00931	0.02033								7.52736	0.000216055	7.21389e-05	0.000288194		3.59204	8.06164e-05	0.00014253	0.000223147		5e-07	2.98	0.007	2.5	0.28
0.01084	0.00278	0.00937	0.02064								8.45599	0.000242653	8.09718e-05	0.000323625		4.57204	0.000102595	0.000181343	0.000283939		1e-06	2.6	0.014	6	0
0.0109	0.00284	0.00942	0.02095			121	8	257	92.5		9.38462	0.00026923	8.97815e-05	0.000359012		5.55204	0.000124564	0.000220104	0.000344667		1e-05	1.96		12	--
0.01097	0.00291	0.00947	0.02126			5.65685	4.24264	5.65685	3.53553		10.3132	0.000295786	9.85656e-05	0.000394352		6.53204	0.000146518	0.000258801	0.000405319		0.0001	1.27	0.12	30	7.7
0.01103	0.00297	0.00952	0.02158								11.2419	0.000322318	0.000107321	0.000429639		7.51204	0.000168457	0.000297423	0.000465881		0.001	0.91	0.26	83.5	3.5
0.01109	0.00304	0.00957	0.0219								12.1705	0.000348824	0.000116047	0.00046487		8.49204	0.000190378	0.00033596	0.000526338
0.01115	0.00311	0.00962	0.02223		PBP1b - Dy647	Step size P1, nm	Weight,%	Step size P1, nm	Weight		13.0991	0.000375301	0.000124739	0.00050004		9.47205	0.000212279	0.000374399	0.000586679
0.01122	0.00318	0.00968	0.02255		1	120	34	220	66		14.0277	0.000401748	0.000133395	0.000535143		10.452	0.000234157	0.000412731	0.000646888		* in bold is the conentration regime chosen for single particle tracking and FRET experiments
0.01128	0.00325	0.00973	0.02289		2	143	40	233	59		14.9564	0.000428162	0.000142014	0.000570176		11.4321	0.00025601	0.000450944	0.000706954
0.01134	0.00333	0.00978	0.02322								15.885	0.000454541	0.000150592	0.000605133		12.4121	0.000277836	0.000489026	0.000766862
0.01141	0.0034	0.00984	0.02357								16.8136	0.000480884	0.000159128	0.000640011		13.392	0.000299632	0.000526969	0.0008266
0.01147	0.00348	0.00989	0.02391								17.7423	0.000507187	0.000167618	0.000674805		14.3721	0.000321396	0.000564759	0.000886155
0.01154	0.00356	0.00995	0.02426			131.5	37	226.5	62.5		18.6709	0.000533449	0.00017606	0.00070951		15.3521	0.000343125	0.000602387	0.000945513
0.0116	0.00364	0.01	0.02461			16.2635	4.24264	9.19239	4.94975		19.5995	0.000559668	0.000184453	0.000744122		16.3321	0.000364819	0.000639843	0.001
0.01167	0.00372	0.01006	0.02497								20.5282	0.000585842	0.000192794	0.000778636		17.3121	0.000386473	0.000677115	0.00106
0.01173	0.0038	0.01011	0.02533								21.4568	0.000611968	0.00020108	0.000813048		18.2921	0.000408086	0.000714193	0.00112
0.0118	0.00389	0.01017	0.0257								22.3854	0.000638045	0.00020931	0.000847355		19.2721	0.000429655	0.000751067	0.00118
0.01187	0.00397	0.01022	0.02607								23.314	0.00066407	0.00021748	0.00088155		20.2521	0.000451179	0.000787726	0.00124
0.01194	0.00406	0.01028	0.02644								24.2427	0.000690041	0.00022559	0.000915631		21.2321	0.000472655	0.000824161	0.0013
0.012	0.00415	0.01033	0.02682								25.1713	0.000715957	0.000233636	0.000949593		22.2121	0.00049408	0.000860361	0.00135
0.01207	0.00425	0.01039	0.0272								26.0999	0.000741815	0.000241616	0.000983431		23.1921	0.000515453	0.000896316	0.00141
0.01214	0.00434	0.01045	0.02759								27.0285	0.000767612	0.00024953	0.00102		24.1721	0.000536771	0.000932017	0.00147
0.01221	0.00444	0.01051	0.02798								27.9572	0.000793348	0.000257373	0.00105		25.1521	0.000558032	0.000967453	0.00153
0.01228	0.00453	0.01056	0.02837								28.8858	0.00081902	0.000265145	0.00108		26.1321	0.000579234	0.001	0.00158
0.01235	0.00463	0.01062	0.02877								29.8144	0.000844625	0.000272843	0.00112		27.1121	0.000600375	0.00104	0.00164
0.01242	0.00473	0.01068	0.02918								30.7431	0.000870163	0.000280465	0.00115		28.0921	0.000621451	0.00107	0.00169
0.01249	0.00484	0.01074	0.02958								31.6717	0.00089563	0.00028801	0.00118		29.0721	0.000642462	0.00111	0.00175
0.01256	0.00494	0.0108	0.03								32.6003	0.000921025	0.000295475	0.00122		30.0521	0.000663405	0.00114	0.0018
0.01263	0.00505	0.01086	0.03041								33.5289	0.000946347	0.000302859	0.00125		31.0321	0.000684278	0.00117	0.00186
0.0127	0.00516	0.01092	0.03084								34.4576	0.000971592	0.000310159	0.00128		32.0121	0.000705078	0.00121	0.00191
0.01277	0.00527	0.01098	0.03126								35.3862	0.000996759	0.000317374	0.00131		32.9921	0.000725804	0.00124	0.00197
0.01285	0.00539	0.01104	0.03169								36.3148	0.00102	0.000324503	0.00135		33.9721	0.000746453	0.00127	0.00202
0.01292	0.0055	0.0111	0.03213								37.2434	0.00105	0.000331543	0.00138		34.9521	0.000767024	0.00131	0.00207
0.01299	0.00562	0.01116	0.03257								38.1721	0.00107	0.000338492	0.00141		35.9321	0.000787514	0.00134	0.00212
0.01307	0.00574	0.01122	0.03302								39.1007	0.0011	0.00034535	0.00144		36.9121	0.00080792	0.00137	0.00218
0.01314	0.00587	0.01128	0.03347								40.0293	0.00112	0.000352115	0.00147		37.8921	0.000828242	0.0014	0.00223
0.01321	0.00599	0.01134	0.03392								40.9579	0.00115	0.000358784	0.0015		38.8721	0.000848477	0.00143	0.00228
0.01329	0.00612	0.0114	0.03438								41.8866	0.00117	0.000365357	0.00154		39.8521	0.000868623	0.00146	0.00233
0.01336	0.00625	0.01147	0.03484								42.8152	0.0012	0.000371831	0.00157		40.8321	0.000888677	0.00149	0.00238
0.01344	0.00639	0.01153	0.03531								43.7438	0.00122	0.000378207	0.0016		41.8121	0.000908639	0.00152	0.00243
0.01352	0.00652	0.01159	0.03579								44.6725	0.00124	0.000384481	0.00163		42.7921	0.000928505	0.00155	0.00248
0.01359	0.00666	0.01166	0.03627								45.6011	0.00127	0.000390654	0.00166		43.7721	0.000948274	0.00158	0.00253
0.01367	0.0068	0.01172	0.03675								46.5297	0.00129	0.000396723	0.00169		44.7521	0.000967945	0.00161	0.00257
0.01375	0.00695	0.01179	0.03724								47.4584	0.00132	0.000402687	0.00172		45.7321	0.000987514	0.00163	0.00262
0.01383	0.00709	0.01185	0.03774								48.387	0.00134	0.000408545	0.00175		46.7121	0.00101	0.00166	0.00267
0.0139	0.00724	0.01191	0.03824								49.3156	0.00136	0.000414296	0.00178		47.6921	0.00103	0.00169	0.00272
0.01398	0.00739	0.01198	0.03874								50.2442	0.00139	0.000419939	0.00181		48.6721	0.00105	0.00172	0.00276
0.01406	0.00755	0.01205	0.03925								51.1729	0.00141	0.000425473	0.00184		49.6521	0.00106	0.00174	0.00281
0.01414	0.00771	0.01211	0.03977								52.1015	0.00143	0.000430897	0.00187		50.6321	0.00108	0.00177	0.00285
0.01422	0.00787	0.01218	0.04029								53.0301	0.00146	0.000436209	0.00189		51.6121	0.0011	0.00179	0.0029
0.0143	0.00803	0.01225	0.04081								53.9587	0.00148	0.000441409	0.00192		52.5921	0.00112	0.00182	0.00294
0.01438	0.0082	0.01231	0.04134								54.8874	0.0015	0.000446496	0.00195		53.5721	0.00114	0.00184	0.00298
0.01447	0.00837	0.01238	0.04188								55.816	0.00153	0.00045147	0.00198		54.5521	0.00116	0.00187	0.00302
0.01455	0.00854	0.01245	0.04242								56.7446	0.00155	0.000456329	0.00201		55.5321	0.00118	0.00189	0.00307
0.01463	0.00872	0.01252	0.04297								57.6733	0.00157	0.000461072	0.00203		56.5121	0.0012	0.00191	0.00311
0.01471	0.0089	0.01258	0.04352								58.6019	0.0016	0.0004657	0.00206		57.4921	0.00121	0.00193	0.00315
0.0148	0.00908	0.01265	0.04408								59.5305	0.00162	0.00047021	0.00209		58.4721	0.00123	0.00196	0.00319
0.01488	0.00927	0.01272	0.04465								60.4591	0.00164	0.000474604	0.00211		59.4521	0.00125	0.00198	0.00323
0.01496	0.00946	0.01279	0.04522								61.3878	0.00166	0.00047888	0.00214		60.4321	0.00127	0.002	0.00327
0.01505	0.00965	0.01286	0.04579								62.3164	0.00168	0.000483037	0.00217		61.4121	0.00129	0.00202	0.0033
0.01513	0.00985	0.01293	0.04637								63.245	0.00171	0.000487076	0.00219		62.3922	0.0013	0.00204	0.00334
0.01522	0.01005	0.013	0.04696								64.1736	0.00173	0.000490996	0.00222		63.3721	0.00132	0.00206	0.00338
0.01531	0.01026	0.01308	0.04755								65.1023	0.00175	0.000494796	0.00224		64.3521	0.00134	0.00208	0.00341
0.01539	0.01046	0.01315	0.04815								66.0309	0.00177	0.000498477	0.00227		65.3321	0.00135	0.00209	0.00345
0.01548	0.01068	0.01322	0.04875								66.9595	0.00179	0.000502038	0.00229		66.3122	0.00137	0.00211	0.00348
0.01557	0.01089	0.01329	0.04936								67.8881	0.00181	0.000505479	0.00232		67.2922	0.00139	0.00213	0.00352
0.01566	0.01111	0.01337	0.04998								68.8168	0.00184	0.000508799	0.00234		68.2722	0.00141	0.00215	0.00355
0.01575	0.01133	0.01344	0.0506								69.7454	0.00186	0.000511999	0.00237		69.2522	0.00142	0.00216	0.00358
0.01583	0.01156	0.01351	0.05123								70.674	0.00188	0.000515078	0.00239		70.2322	0.00144	0.00218	0.00362
0.01592	0.01179	0.01359	0.05187								71.6027	0.0019	0.000518037	0.00242		71.2122	0.00145	0.00219	0.00365
0.01601	0.01203	0.01366	0.05251								72.5313	0.00192	0.000520876	0.00244		72.1922	0.00147	0.00221	0.00368
0.01611	0.01227	0.01374	0.05315								73.4599	0.00194	0.000523594	0.00246		73.1722	0.00149	0.00222	0.00371
0.0162	0.01251	0.01381	0.05381								74.3885	0.00196	0.000526191	0.00249		74.1522	0.0015	0.00223	0.00374
0.01629	0.01276	0.01389	0.05447								75.3172	0.00198	0.000528669	0.00251		75.1322	0.00152	0.00225	0.00377
0.01638	0.01301	0.01396	0.05513								76.2458	0.002	0.000531027	0.00253		76.1122	0.00153	0.00226	0.00379
0.01647	0.01327	0.01404	0.0558								77.1744	0.00202	0.000533265	0.00255		77.0922	0.00155	0.00227	0.00382
0.01657	0.01353	0.01412	0.05648								78.103	0.00204	0.000535384	0.00257		78.0722	0.00157	0.00228	0.00385
0.01666	0.0138	0.01419	0.05717								79.0317	0.00206	0.000537385	0.0026		79.0522	0.00158	0.00229	0.00387
0.01676	0.01407	0.01427	0.05786								79.9603	0.00208	0.000539266	0.00262		80.0322	0.0016	0.0023	0.0039
0.01685	0.01434	0.01435	0.05856								80.8889	0.0021	0.000541029	0.00264		81.0122	0.00161	0.00231	0.00392
0.01695	0.01462	0.01443	0.05926								81.8176	0.00212	0.000542675	0.00266		81.9922	0.00162	0.00232	0.00395
0.01704	0.01491	0.01451	0.05997								82.7462	0.00213	0.000544204	0.00268		82.9722	0.00164	0.00233	0.00397
0.01714	0.0152	0.01459	0.06069								83.6748	0.00215	0.000545615	0.0027		83.9522	0.00165	0.00234	0.00399
0.01724	0.01549	0.01467	0.06141								84.6034	0.00217	0.000546911	0.00272		84.9322	0.00167	0.00235	0.00402
0.01733	0.01579	0.01475	0.06214								85.5321	0.00219	0.000548092	0.00274		85.9122	0.00168	0.00236	0.00404
0.01743	0.0161	0.01483	0.06288								86.4607	0.00221	0.000549158	0.00276		86.8922	0.0017	0.00236	0.00406
0.01753	0.01641	0.01491	0.06363								87.3893	0.00223	0.000550109	0.00278		87.8722	0.00171	0.00237	0.00408
0.01763	0.01672	0.01499	0.06438								88.318	0.00224	0.000550948	0.0028		88.8522	0.00172	0.00237	0.0041
0.01773	0.01704	0.01508	0.06514								89.2466	0.00226	0.000551674	0.00281		89.8322	0.00174	0.00238	0.00411
0.01783	0.01737	0.01516	0.0659								90.1752	0.00228	0.000552288	0.00283		90.8122	0.00175	0.00238	0.00413
0.01793	0.0177	0.01524	0.06668								91.1038	0.0023	0.000552792	0.00285		91.7922	0.00176	0.00239	0.00415
0.01803	0.01804	0.01532	0.06746								92.0325	0.00231	0.000553185	0.00287		92.7722	0.00178	0.00239	0.00417
0.01814	0.01838	0.01541	0.06825								92.9611	0.00233	0.00055347	0.00288		93.7522	0.00179	0.00239	0.00418
0.01824	0.01873	0.01549	0.06904								93.8897	0.00235	0.000553646	0.0029		94.7322	0.0018	0.0024	0.0042
0.01834	0.01908	0.01558	0.06984								94.8183	0.00236	0.000553716	0.00292		95.7122	0.00181	0.0024	0.00421
0.01845	0.01944	0.01566	0.07065								95.747	0.00238	0.000553679	0.00293		96.6922	0.00182	0.0024	0.00423
0.01855	0.01981	0.01575	0.07147								96.6756	0.0024	0.000553538	0.00295		97.6722	0.00184	0.0024	0.00424
0.01866	0.02018	0.01584	0.07229								97.6042	0.00241	0.000553292	0.00297		98.6522	0.00185	0.0024	0.00425
0.01876	0.02056	0.01592	0.07312								98.5329	0.00243	0.000552944	0.00298		99.6322	0.00186	0.0024	0.00426
0.01887	0.02094	0.01601	0.07396								99.4615	0.00245	0.000552494	0.003		100.612	0.00187	0.0024	0.00427
0.01898	0.02133	0.0161	0.07481								100.39	0.00246	0.000551943	0.00301		101.592	0.00188	0.0024	0.00429
0.01908	0.02173	0.01619	0.07567								101.319	0.00248	0.000551293	0.00303		102.572	0.00189	0.0024	0.0043
0.01919	0.02213	0.01628	0.07653								102.247	0.00249	0.000550545	0.00304		103.552	0.0019	0.0024	0.00431
0.0193	0.02254	0.01637	0.0774								103.176	0.00251	0.0005497	0.00306		104.532	0.00192	0.0024	0.00431
0.01941	0.02295	0.01646	0.07828								104.105	0.00252	0.000548759	0.00307		105.512	0.00193	0.0024	0.00432
0.01952	0.02338	0.01655	0.07916								105.033	0.00254	0.000547724	0.00308		106.492	0.00194	0.00239	0.00433
0.01963	0.02381	0.01664	0.08006								105.962	0.00255	0.000546596	0.0031		107.472	0.00195	0.00239	0.00434
0.01974	0.02424	0.01673	0.08096								106.891	0.00257	0.000545376	0.00311		108.452	0.00196	0.00239	0.00434
0.01985	0.02469	0.01682	0.08187								107.819	0.00258	0.000544066	0.00312		109.432	0.00197	0.00238	0.00435
0.01997	0.02514	0.01691	0.08279								108.748	0.00259	0.000542667	0.00314		110.412	0.00198	0.00238	0.00435
0.02008	0.02559	0.017	0.08371								109.676	0.00261	0.00054118	0.00315		111.392	0.00199	0.00237	0.00436
0.02019	0.02606	0.0171	0.08465								110.605	0.00262	0.000539607	0.00316		112.372	0.002	0.00237	0.00436
0.02031	0.02653	0.01719	0.08559								111.534	0.00263	0.000537949	0.00317		113.352	0.002	0.00236	0.00437
0.02042	0.02701	0.01729	0.08654								112.462	0.00265	0.000536208	0.00318		114.332	0.00201	0.00236	0.00437
0.02054	0.02749	0.01738	0.0875								113.391	0.00266	0.000534385	0.0032		115.312	0.00202	0.00235	0.00437
0.02065	0.02799	0.01748	0.08847								114.32	0.00267	0.000532481	0.00321		116.292	0.00203	0.00234	0.00437
0.02077	0.02849	0.01757	0.08945								115.248	0.00269	0.000530498	0.00322		117.272	0.00204	0.00233	0.00437
0.02089	0.029	0.01767	0.09043								116.177	0.0027	0.000528438	0.00323		118.252	0.00205	0.00233	0.00437
0.02101	0.02952	0.01777	0.09143								117.105	0.00271	0.000526302	0.00324		119.232	0.00206	0.00232	0.00437
0.02113	0.03004	0.01786	0.09243								118.034	0.00272	0.000524092	0.00325		120.212	0.00206	0.00231	0.00437
0.02125	0.03058	0.01796	0.09345								118.963	0.00274	0.000521809	0.00326		121.192	0.00207	0.0023	0.00437
0.02137	0.03112	0.01806	0.09447								119.891	0.00275	0.000519454	0.00327		122.172	0.00208	0.00229	0.00437
0.02149	0.03167	0.01816	0.0955								120.82	0.00276	0.000517029	0.00328		123.152	0.00209	0.00228	0.00437
0.02161	0.03222	0.01826	0.09654								121.749	0.00277	0.000514536	0.00328		124.132	0.00209	0.00227	0.00437
0.02173	0.03279	0.01836	0.09758								122.677	0.00278	0.000511977	0.00329		125.112	0.0021	0.00226	0.00436
0.02186	0.03336	0.01846	0.09864								123.606	0.00279	0.000509352	0.0033		126.092	0.00211	0.00225	0.00436
0.02198	0.03395	0.01856	0.09971								124.534	0.0028	0.000506664	0.00331		127.072	0.00211	0.00224	0.00436
0.0221	0.03454	0.01866	0.10078								125.463	0.00281	0.000503913	0.00332		128.052	0.00212	0.00223	0.00435
0.02223	0.03514	0.01876	0.10187								126.392	0.00282	0.000501102	0.00333		129.032	0.00213	0.00222	0.00435
0.02236	0.03575	0.01887	0.10297								127.32	0.00283	0.000498233	0.00333		130.012	0.00213	0.00221	0.00434
0.02248	0.03637	0.01897	0.10407								128.249	0.00284	0.000495306	0.00334		130.992	0.00214	0.0022	0.00434
0.02261	0.03699	0.01907	0.10518								129.178	0.00285	0.000492323	0.00335		131.972	0.00214	0.00219	0.00433
0.02274	0.03763	0.01918	0.10631								130.106	0.00286	0.000489286	0.00335		132.952	0.00215	0.00217	0.00432
0.02287	0.03828	0.01928	0.10744								131.035	0.00287	0.000486197	0.00336		133.932	0.00215	0.00216	0.00432
0.023	0.03893	0.01939	0.10859								131.963	0.00288	0.000483056	0.00337		134.912	0.00216	0.00215	0.00431
0.02313	0.0396	0.0195	0.10974								132.892	0.00289	0.000479867	0.00337		135.892	0.00217	0.00214	0.0043
0.02326	0.04027	0.0196	0.1109								133.821	0.0029	0.000476629	0.00338		136.872	0.00217	0.00212	0.00429
0.02339	0.04096	0.01971	0.11208								134.749	0.00291	0.000473345	0.00338		137.852	0.00217	0.00211	0.00428
0.02352	0.04165	0.01982	0.11326								135.678	0.00292	0.000470017	0.00339		138.832	0.00218	0.00209	0.00427
0.02366	0.04235	0.01993	0.11445								136.607	0.00293	0.000466646	0.00339		139.812	0.00218	0.00208	0.00426
0.02379	0.04307	0.02004	0.11566								137.535	0.00293	0.000463233	0.0034		140.792	0.00219	0.00207	0.00425
0.02393	0.04379	0.02015	0.11687								138.464	0.00294	0.00045978	0.0034		141.772	0.00219	0.00205	0.00424
0.02406	0.04452	0.02026	0.1181								139.392	0.00295	0.000456288	0.00341		142.752	0.0022	0.00204	0.00423
0.0242	0.04527	0.02037	0.11933								140.321	0.00296	0.00045276	0.00341		143.732	0.0022	0.00202	0.00422
0.02433	0.04602	0.02048	0.12058								141.25	0.00296	0.000449196	0.00341		144.712	0.0022	0.00201	0.00421
0.02447	0.04679	0.02059	0.12183								142.178	0.00297	0.000445599	0.00342		145.692	0.00221	0.00199	0.0042
0.02461	0.04756	0.02071	0.1231								143.107	0.00298	0.000441969	0.00342		146.672	0.00221	0.00198	0.00419
0.02475	0.04835	0.02082	0.12438								144.036	0.00299	0.000438309	0.00342		147.652	0.00221	0.00196	0.00417
0.02489	0.04915	0.02093	0.12567								144.964	0.00299	0.000434619	0.00343		148.632	0.00221	0.00195	0.00416
0.02503	0.04996	0.02105	0.12697								145.893	0.003	0.000430901	0.00343		149.612	0.00222	0.00193	0.00415
0.02517	0.05078	0.02117	0.12828								146.821	0.00301	0.000427157	0.00343		150.592	0.00222	0.00192	0.00413
0.02532	0.05161	0.02128	0.1296								147.75	0.00301	0.000423388	0.00343		151.572	0.00222	0.0019	0.00412
0.02546	0.05245	0.0214	0.13094								148.679	0.00302	0.000419595	0.00344		152.552	0.00222	0.00188	0.00411
0.02561	0.0533	0.02152	0.13228								149.607	0.00302	0.000415781	0.00344		153.532	0.00222	0.00187	0.00409
0.02575	0.05417	0.02163	0.13364								150.536	0.00303	0.000411946	0.00344		154.512	0.00223	0.00185	0.00408
0.0259	0.05504	0.02175	0.13501								151.465	0.00303	0.000408092	0.00344		155.492	0.00223	0.00183	0.00406
0.02604	0.05593	0.02187	0.13639								152.393	0.00304	0.00040422	0.00344		156.472	0.00223	0.00182	0.00405
0.02619	0.05683	0.02199	0.13778								153.322	0.00304	0.000400331	0.00344		157.452	0.00223	0.0018	0.00403
0.02634	0.05775	0.02211	0.13918								154.251	0.00305	0.000396428	0.00344		158.432	0.00223	0.00178	0.00402
0.02649	0.05867	0.02223	0.14059								155.179	0.00305	0.000392511	0.00345		159.412	0.00223	0.00177	0.004
0.02664	0.05961	0.02236	0.14202								156.108	0.00306	0.000388581	0.00345		160.392	0.00223	0.00175	0.00398
0.02679	0.06055	0.02248	0.14346								157.036	0.00306	0.00038464	0.00345		161.372	0.00223	0.00173	0.00397
0.02694	0.06152	0.0226	0.14491								157.965	0.00307	0.00038069	0.00345		162.352	0.00223	0.00172	0.00395
0.02709	0.06249	0.02273	0.14637								158.894	0.00307	0.000376731	0.00345		163.332	0.00223	0.0017	0.00393
0.02725	0.06347	0.02285	0.14785								159.822	0.00307	0.000372765	0.00345		164.312	0.00223	0.00168	0.00392
0.0274	0.06447	0.02298	0.14934								160.751	0.00308	0.000368793	0.00344		165.292	0.00223	0.00167	0.0039
0.02756	0.06549	0.0231	0.15083								161.68	0.00308	0.000364816	0.00344		166.272	0.00223	0.00165	0.00388
0.02771	0.06651	0.02323	0.15235								162.608	0.00308	0.000360836	0.00344		167.252	0.00223	0.00163	0.00386
0.02787	0.06755	0.02336	0.15387								163.537	0.00308	0.000356853	0.00344		168.232	0.00223	0.00161	0.00385
0.02803	0.0686	0.02348	0.15541								164.465	0.00309	0.00035287	0.00344		169.212	0.00223	0.0016	0.00383
0.02819	0.06966	0.02361	0.15696								165.394	0.00309	0.000348886	0.00344		170.192	0.00223	0.00158	0.00381
0.02835	0.07074	0.02374	0.15852								166.323	0.00309	0.000344903	0.00344		171.172	0.00223	0.00156	0.00379
0.02851	0.07183	0.02387	0.1601								167.251	0.00309	0.000340923	0.00344		172.152	0.00223	0.00154	0.00377
0.02867	0.07294	0.024	0.16169								168.18	0.0031	0.000336945	0.00343		173.132	0.00223	0.00153	0.00375
0.02883	0.07405	0.02414	0.16329								169.109	0.0031	0.000332973	0.00343		174.112	0.00223	0.00151	0.00374
0.029	0.07519	0.02427	0.1649								170.037	0.0031	0.000329005	0.00343		175.092	0.00222	0.00149	0.00372
0.02916	0.07633	0.0244	0.16653								170.966	0.0031	0.000325045	0.00343		176.072	0.00222	0.00147	0.0037
0.02933	0.07749	0.02453	0.16817								171.894	0.0031	0.000321091	0.00342		177.052	0.00222	0.00146	0.00368
0.02949	0.07867	0.02467	0.16983								172.823	0.0031	0.000317146	0.00342		178.032	0.00222	0.00144	0.00366
0.02966	0.07986	0.0248	0.1715								173.752	0.0031	0.000313211	0.00342		179.012	0.00222	0.00142	0.00364
0.02983	0.08106	0.02494	0.17318								174.68	0.00311	0.000309286	0.00341		179.992	0.00221	0.00141	0.00362
0.03	0.08228	0.02508	0.17488								175.609	0.00311	0.000305373	0.00341		180.972	0.00221	0.00139	0.0036
0.03017	0.08351	0.02522	0.17658								176.538	0.00311	0.000301471	0.00341		181.952	0.00221	0.00137	0.00358
0.03034	0.08476	0.02535	0.17831								177.466	0.00311	0.000297583	0.0034		182.932	0.00221	0.00135	0.00356
0.03051	0.08602	0.02549	0.18005								178.395	0.00311	0.000293709	0.0034		183.912	0.0022	0.00134	0.00354
0.03068	0.0873	0.02563	0.1818								179.323	0.00311	0.00028985	0.0034		184.892	0.0022	0.00132	0.00352
0.03086	0.08859	0.02577	0.18356								180.252	0.00311	0.000286006	0.00339		185.872	0.0022	0.0013	0.0035
0.03103	0.0899	0.02591	0.18534								181.181	0.00311	0.000282179	0.00339		186.852	0.00219	0.00129	0.00348
0.03121	0.09122	0.02606	0.18714								182.109	0.00311	0.000278369	0.00338		187.832	0.00219	0.00127	0.00346
0.03139	0.09256	0.0262	0.18894								183.038	0.0031	0.000274577	0.00338		188.812	0.00219	0.00125	0.00344
0.03156	0.09391	0.02634	0.19077								183.967	0.0031	0.000270804	0.00337		189.792	0.00218	0.00124	0.00342
0.03174	0.09528	0.02649	0.1926								184.895	0.0031	0.000267051	0.00337		190.772	0.00218	0.00122	0.0034
0.03192	0.09666	0.02663	0.19446								185.824	0.0031	0.000263317	0.00336		191.752	0.00217	0.0012	0.00338
0.0321	0.09806	0.02678	0.19632								186.752	0.0031	0.000259605	0.00336		192.732	0.00217	0.00119	0.00336
0.03228	0.09948	0.02693	0.1982								187.681	0.0031	0.000255914	0.00335		193.712	0.00217	0.00117	0.00334
0.03247	0.10091	0.02707	0.2001								188.61	0.0031	0.000252245	0.00335		194.692	0.00216	0.00115	0.00332
0.03265	0.10236	0.02722	0.20201								189.538	0.00309	0.000248599	0.00334		195.672	0.00216	0.00114	0.00329
0.03284	0.10383	0.02737	0.20394								190.467	0.00309	0.000244977	0.00334		196.652	0.00215	0.00112	0.00327
0.03302	0.10531	0.02752	0.20588								191.396	0.00309	0.000241378	0.00333		197.632	0.00215	0.0011	0.00325
0.03321	0.1068	0.02767	0.20783								192.324	0.00309	0.000237804	0.00333		198.612	0.00214	0.00109	0.00323
0.0334	0.10832	0.02783	0.20981								193.253	0.00309	0.000234255	0.00332		199.592	0.00214	0.00107	0.00321
0.03359	0.10985	0.02798	0.21179								194.181	0.00308	0.000230732	0.00331		200.572	0.00213	0.00106	0.00319
0.03378	0.1114	0.02813	0.21379								195.11	0.00308	0.000227234	0.00331		201.552	0.00213	0.00104	0.00317
0.03397	0.11296	0.02829	0.21581								196.039	0.00308	0.000223763	0.0033		202.532	0.00212	0.00103	0.00315
0.03416	0.11454	0.02844	0.21785								196.967	0.00307	0.00022032	0.00329		203.512	0.00212	0.00101	0.00313
0.03436	0.11614	0.0286	0.21989								197.896	0.00307	0.000216903	0.00329		204.492	0.00211	0.000995199	0.00311
0.03455	0.11775	0.02875	0.22196								198.825	0.00307	0.000213515	0.00328		205.472	0.00211	0.000980004	0.00309
0.03475	0.11939	0.02891	0.22404								199.753	0.00306	0.000210154	0.00327		206.452	0.0021	0.000964926	0.00307
0.03494	0.12104	0.02907	0.22614								200.682	0.00306	0.000206823	0.00327		207.432	0.00209	0.000949966	0.00304
0.03514	0.1227	0.02923	0.22825								201.611	0.00306	0.00020352	0.00326		208.412	0.00209	0.000935128	0.00302
0.03534	0.12439	0.02939	0.23038								202.539	0.00305	0.000200247	0.00325		209.392	0.00208	0.000920412	0.003
0.03554	0.12609	0.02955	0.23252								203.468	0.00305	0.000197003	0.00325		210.372	0.00208	0.000905821	0.00298
0.03574	0.12781	0.02971	0.23468								204.396	0.00304	0.000193789	0.00324		211.352	0.00207	0.000891356	0.00296
0.03595	0.12955	0.02988	0.23686								205.325	0.00304	0.000190606	0.00323		212.332	0.00206	0.000877018	0.00294
0.03615	0.1313	0.03004	0.23905								206.254	0.00303	0.000187453	0.00322		213.312	0.00206	0.000862809	0.00292
0.03636	0.13308	0.03021	0.24126								207.182	0.00303	0.000184331	0.00321		214.292	0.00205	0.000848731	0.0029
0.03656	0.13487	0.03037	0.24348								208.111	0.00303	0.00018124	0.00321		215.272	0.00204	0.000834785	0.00288
0.03677	0.13668	0.03054	0.24572								209.04	0.00302	0.00017818	0.0032		216.252	0.00204	0.000820971	0.00286
0.03698	0.13851	0.03071	0.24798								209.968	0.00302	0.000175152	0.00319		217.232	0.00203	0.000807292	0.00284
0.03719	0.14035	0.03087	0.25026								210.897	0.00301	0.000172155	0.00318		218.212	0.00202	0.000793748	0.00282
0.0374	0.14222	0.03104	0.25255								211.825	0.003	0.00016919	0.00317		219.192	0.00202	0.00078034	0.0028
0.03761	0.1441	0.03121	0.25486								212.754	0.003	0.000166257	0.00317		220.172	0.00201	0.000767069	0.00278
0.03782	0.146	0.03139	0.25718								213.683	0.00299	0.000163356	0.00316		221.152	0.002	0.000753937	0.00276
0.03804	0.14792	0.03156	0.25952								214.611	0.00299	0.000160488	0.00315		222.132	0.00199	0.000740943	0.00274
0.03825	0.14986	0.03173	0.26188								215.54	0.00298	0.000157651	0.00314		223.112	0.00199	0.000728089	0.00272
0.03847	0.15182	0.03191	0.26426								216.469	0.00298	0.000154848	0.00313		224.092	0.00198	0.000715375	0.0027
0.03869	0.1538	0.03208	0.26665								217.397	0.00297	0.000152076	0.00312		225.072	0.00197	0.000702802	0.00268
0.03891	0.15579	0.03226	0.26906								218.326	0.00296	0.000149338	0.00311		226.052	0.00196	0.00069037	0.00266
0.03913	0.1578	0.03243	0.27148								219.254	0.00296	0.000146632	0.0031		227.032	0.00196	0.00067808	0.00264
0.03935	0.15984	0.03261	0.27393								220.183	0.00295	0.000143958	0.00309		228.012	0.00195	0.000665932	0.00262
0.03957	0.16189	0.03279	0.27639								221.112	0.00294	0.000141317	0.00309		228.992	0.00194	0.000653927	0.0026
0.0398	0.16396	0.03297	0.27886								222.04	0.00294	0.00013871	0.00308		229.972	0.00193	0.000642064	0.00258
0.04002	0.16605	0.03315	0.28136								222.969	0.00293	0.000136134	0.00307		230.952	0.00193	0.000630344	0.00256
0.04025	0.16816	0.03333	0.28387								223.898	0.00292	0.000133592	0.00306		231.932	0.00192	0.000618768	0.00254
0.04048	0.17029	0.03352	0.2864								224.826	0.00292	0.000131082	0.00305		232.912	0.00191	0.000607334	0.00252
0.04071	0.17244	0.0337	0.28895								225.755	0.00291	0.000128605	0.00304		233.892	0.0019	0.000596044	0.0025
0.04094	0.17461	0.03388	0.29151								226.683	0.0029	0.00012616	0.00303		234.872	0.00189	0.000584897	0.00248
0.04117	0.17679	0.03407	0.29409								227.612	0.00289	0.000123748	0.00302		235.852	0.00188	0.000573894	0.00246
0.0414	0.179	0.03426	0.29669								228.541	0.00289	0.000121369	0.00301		236.832	0.00188	0.000563033	0.00244
0.04164	0.18123	0.03445	0.29931								229.469	0.00288	0.000119022	0.003		237.812	0.00187	0.000552315	0.00242
0.04188	0.18347	0.03463	0.30194								230.398	0.00287	0.000116707	0.00299		238.792	0.00186	0.00054174	0.0024
0.04211	0.18574	0.03482	0.30459								231.327	0.00286	0.000114424	0.00298		239.772	0.00185	0.000531307	0.00238
0.04235	0.18803	0.03502	0.30726								232.255	0.00286	0.000112174	0.00297		240.752	0.00184	0.000521016	0.00236
0.04259	0.19033	0.03521	0.30994								233.184	0.00285	0.000109956	0.00296		241.732	0.00183	0.000510866	0.00234
0.04283	0.19266	0.0354	0.31265								234.112	0.00284	0.000107769	0.00295		242.712	0.00182	0.000500858	0.00233
0.04308	0.195	0.0356	0.31537								235.041	0.00283	0.000105614	0.00294		243.692	0.00182	0.00049099	0.00231
0.04332	0.19737	0.03579	0.31811								235.97	0.00282	0.000103491	0.00293		244.672	0.00181	0.000481263	0.00229
0.04357	0.19975	0.03599	0.32086								236.898	0.00282	0.000101399	0.00292		245.653	0.0018	0.000471675	0.00227
0.04381	0.20216	0.03618	0.32364								237.827	0.00281	9.93382e-05	0.00291		246.632	0.00179	0.000462227	0.00225
0.04406	0.20458	0.03638	0.32643								238.756	0.0028	9.73087e-05	0.0029		247.613	0.00178	0.000452917	0.00223
0.04431	0.20702	0.03658	0.32924								239.684	0.00279	9.531e-05	0.00288		248.593	0.00177	0.000443744	0.00222
0.04456	0.20949	0.03678	0.33206								240.613	0.00278	9.33421e-05	0.00287		249.572	0.00176	0.000434709	0.0022
0.04481	0.21197	0.03698	0.33491								241.542	0.00277	9.14047e-05	0.00286		250.553	0.00175	0.00042581	0.00218
0.04507	0.21448	0.03719	0.33777								242.47	0.00276	8.94977e-05	0.00285		251.533	0.00174	0.000417047	0.00216
0.04532	0.217	0.03739	0.34065								243.399	0.00275	8.76208e-05	0.00284		252.513	0.00173	0.000408418	0.00214
0.04558	0.21955	0.0376	0.34354								244.327	0.00274	8.57737e-05	0.00283		253.493	0.00173	0.000399924	0.00213
0.04584	0.22211	0.0378	0.34646								245.256	0.00274	8.39564e-05	0.00282		254.473	0.00172	0.000391562	0.00211
0.0461	0.2247	0.03801	0.34939								246.185	0.00273	8.21685e-05	0.00281		255.453	0.00171	0.000383333	0.00209
0.04636	0.2273	0.03822	0.35234								247.113	0.00272	8.04099e-05	0.0028		256.433	0.0017	0.000375235	0.00207
0.04662	0.22993	0.03843	0.3553								248.042	0.00271	7.86803e-05	0.00279		257.413	0.00169	0.000367267	0.00206
0.04689	0.23257	0.03864	0.35829								248.971	0.0027	7.69795e-05	0.00278		258.393	0.00168	0.000359428	0.00204
0.04715	0.23524	0.03885	0.36129								249.899	0.00269	7.53071e-05	0.00276		259.373	0.00167	0.000351718	0.00202
0.04742	0.23792	0.03907	0.36431								250.828	0.00268	7.3663e-05	0.00275		260.353	0.00166	0.000344135	0.002
0.04769	0.24063	0.03928	0.36734								251.756	0.00267	7.2047e-05	0.00274		261.333	0.00165	0.000336679	0.00199
0.04796	0.24335	0.03949	0.37039								252.685	0.00266	7.04587e-05	0.00273		262.313	0.00164	0.000329347	0.00197
0.04823	0.2461	0.03971	0.37346								253.614	0.00265	6.88979e-05	0.00272		263.293	0.00163	0.00032214	0.00195
0.04851	0.24886	0.03993	0.37655								254.542	0.00264	6.73643e-05	0.00271		264.273	0.00162	0.000315055	0.00194
0.04878	0.25165	0.04015	0.37966								255.471	0.00263	6.58577e-05	0.0027		265.253	0.00161	0.000308093	0.00192
0.04906	0.25446	0.04037	0.38278								256.4	0.00262	6.43778e-05	0.00268		266.233	0.0016	0.000301251	0.0019
0.04934	0.25728	0.04059	0.38592								257.328	0.00261	6.29243e-05	0.00267		267.213	0.00159	0.000294529	0.00189
0.04962	0.26013	0.04081	0.38907								258.257	0.0026	6.14969e-05	0.00266		268.193	0.00158	0.000287925	0.00187
0.0499	0.26299	0.04104	0.39224								259.185	0.00259	6.00954e-05	0.00265		269.173	0.00157	0.000281438	0.00186
0.05018	0.26588	0.04126	0.39543								260.114	0.00258	5.87194e-05	0.00264		270.153	0.00156	0.000275067	0.00184
0.05046	0.26878	0.04149	0.39864								261.043	0.00257	5.73688e-05	0.00263		271.133	0.00155	0.000268811	0.00182
0.05075	0.27171	0.04172	0.40186								261.971	0.00256	5.60431e-05	0.00261		272.113	0.00154	0.000262669	0.00181
0.05104	0.27465	0.04194	0.4051								262.9	0.00255	5.47421e-05	0.0026		273.093	0.00153	0.000256639	0.00179
0.05133	0.27762	0.04218	0.40836								263.829	0.00254	5.34656e-05	0.00259		274.073	0.00153	0.000250719	0.00178
0.05162	0.2806	0.04241	0.41163								264.757	0.00253	5.22132e-05	0.00258		275.053	0.00152	0.00024491	0.00176
0.05191	0.2836	0.04264	0.41492								265.686	0.00251	5.09846e-05	0.00257		276.033	0.00151	0.000239209	0.00174
0.05221	0.28663	0.04287	0.41823								266.614	0.0025	4.97796e-05	0.00255		277.013	0.0015	0.000233615	0.00173
0.0525	0.28967	0.04311	0.42155								267.543	0.00249	4.85978e-05	0.00254		277.993	0.00149	0.000228128	0.00171
0.0528	0.29273	0.04335	0.42489								268.472	0.00248	4.74389e-05	0.00253		278.973	0.00148	0.000222745	0.0017
0.0531	0.29581	0.04358	0.42824								269.4	0.00247	4.63028e-05	0.00252		279.953	0.00147	0.000217465	0.00168
0.0534	0.29891	0.04382	0.43161								270.329	0.00246	4.51889e-05	0.00251		280.933	0.00146	0.000212287	0.00167
0.0537	0.30203	0.04406	0.43499								271.258	0.00245	4.40971e-05	0.00249		281.913	0.00145	0.000207211	0.00165
0.05401	0.30517	0.0443	0.4384								272.186	0.00244	4.30271e-05	0.00248		282.893	0.00144	0.000202233	0.00164
0.05431	0.30833	0.04455	0.44181								273.115	0.00243	4.19786e-05	0.00247		283.873	0.00143	0.000197354	0.00162
0.05462	0.31151	0.04479	0.44525								274.043	0.00242	4.09512e-05	0.00246		284.853	0.00142	0.000192572	0.00161
0.05493	0.3147	0.04504	0.44869								274.972	0.00241	3.99446e-05	0.00245		285.833	0.00141	0.000187885	0.0016
0.05524	0.31792	0.04528	0.45216								275.901	0.00239	3.89587e-05	0.00243		286.813	0.0014	0.000183292	0.00158
0.05556	0.32115	0.04553	0.45563								276.829	0.00238	3.7993e-05	0.00242		287.793	0.00139	0.000178793	0.00157
0.05587	0.3244	0.04578	0.45913								277.758	0.00237	3.70473e-05	0.00241		288.773	0.00138	0.000174385	0.00155
0.05619	0.32767	0.04603	0.46264								278.687	0.00236	3.61212e-05	0.0024		289.753	0.00137	0.000170067	0.00154
0.05651	0.33096	0.04629	0.46616								279.615	0.00235	3.52146e-05	0.00238		290.733	0.00136	0.000165838	0.00152
0.05683	0.33427	0.04654	0.4697								280.544	0.00234	3.4327e-05	0.00237		291.713	0.00135	0.000161697	0.00151
0.05715	0.3376	0.0468	0.47325								281.472	0.00233	3.34583e-05	0.00236		292.693	0.00134	0.000157643	0.0015
0.05747	0.34094	0.04705	0.47682								282.401	0.00231	3.26081e-05	0.00235		293.673	0.00133	0.000153674	0.00148
0.0578	0.3443	0.04731	0.4804								283.33	0.0023	3.1776e-05	0.00233		294.653	0.00132	0.000149788	0.00147
0.05813	0.34768	0.04757	0.48399								284.258	0.00229	3.0962e-05	0.00232		295.633	0.00131	0.000145985	0.00146
0.05846	0.35108	0.04783	0.4876								285.187	0.00228	3.01655e-05	0.00231		296.613	0.0013	0.000142263	0.00144
0.05879	0.35449	0.04809	0.49122								286.116	0.00227	2.93865e-05	0.0023		297.593	0.00129	0.000138621	0.00143
0.05912	0.35792	0.04836	0.49486								287.044	0.00226	2.86245e-05	0.00229		298.573	0.00128	0.000135058	0.00142
0.05946	0.36137	0.04862	0.4985								287.973	0.00225	2.78793e-05	0.00227		299.553	0.00127	0.000131573	0.0014
0.05979	0.36484	0.04889	0.50217								288.902	0.00223	2.71507e-05	0.00226		300.533	0.00126	0.000128164	0.00139
0.06013	0.36832	0.04916	0.50584								289.83	0.00222	2.64383e-05	0.00225		301.513	0.00125	0.000124829	0.00138
0.06047	0.37183	0.04943	0.50953								290.759	0.00221	2.57418e-05	0.00224		302.493	0.00124	0.000121569	0.00136
0.06082	0.37534	0.0497	0.51323								291.687	0.0022	2.50611e-05	0.00222		303.473	0.00123	0.000118381	0.00135
0.06116	0.37888	0.04997	0.51694								292.616	0.00219	2.43957e-05	0.00221		304.453	0.00122	0.000115264	0.00134
0.06151	0.38243	0.05025	0.52067								293.545	0.00217	2.37455e-05	0.0022		305.433	0.00121	0.000112217	0.00133
0.06186	0.38599	0.05052	0.5244								294.473	0.00216	2.31102e-05	0.00219		306.413	0.0012	0.000109239	0.00131
0.06221	0.38958	0.0508	0.52815								295.402	0.00215	2.24896e-05	0.00217		307.393	0.00119	0.000106329	0.0013
0.06256	0.39318	0.05108	0.53191								296.331	0.00214	2.18833e-05	0.00216		308.373	0.00118	0.000103486	0.00129
0.06291	0.39679	0.05136	0.53568								297.259	0.00213	2.12911e-05	0.00215		309.353	0.00117	0.000100707	0.00128
0.06327	0.40042	0.05164	0.53947								298.188	0.00212	2.07127e-05	0.00214		310.333	0.00117	9.7993e-05	0.00126
0.06363	0.40407	0.05192	0.54326								299.116	0.0021	2.01479e-05	0.00212		311.313	0.00116	9.53418e-05	0.00125
0.06399	0.40773	0.05221	0.54707								300.045	0.00209	1.95965e-05	0.00211		312.293	0.00115	9.27525e-05	0.00124
0.06435	0.41141	0.0525	0.55088								300.974	0.00208	1.90581e-05	0.0021		313.273	0.00114	9.0224e-05	0.00123
0.06472	0.4151	0.05278	0.55471								301.902	0.00207	1.85326e-05	0.00209		314.253	0.00113	8.7755e-05	0.00122
0.06508	0.4188	0.05307	0.55854								302.831	0.00206	1.80197e-05	0.00207		315.233	0.00112	8.53445e-05	0.0012
0.06545	0.42252	0.05336	0.56239								303.76	0.00204	1.75191e-05	0.00206		316.213	0.00111	8.29915e-05	0.00119
0.06582	0.42626	0.05366	0.56624								304.688	0.00203	1.70307e-05	0.00205		317.193	0.0011	8.06948e-05	0.00118
0.0662	0.43001	0.05395	0.57011								305.617	0.00202	1.65541e-05	0.00204		318.173	0.00109	7.84533e-05	0.00117
0.06657	0.43377	0.05425	0.57398								306.545	0.00201	1.60892e-05	0.00202		319.153	0.00108	7.6266e-05	0.00116
0.06695	0.43755	0.05454	0.57786								307.474	0.002	1.56357e-05	0.00201		320.133	0.00107	7.41318e-05	0.00115
0.06733	0.44134	0.05484	0.58175								308.403	0.00199	1.51934e-05	0.002		321.113	0.00106	7.20498e-05	0.00113
0.06771	0.44514	0.05515	0.58565								309.331	0.00197	1.47621e-05	0.00199		322.093	0.00105	7.00188e-05	0.00112
0.0681	0.44895	0.05545	0.58956								310.26	0.00196	1.43415e-05	0.00198		323.073	0.00104	6.80378e-05	0.00111
0.06848	0.45278	0.05575	0.59347								311.189	0.00195	1.39314e-05	0.00196		324.053	0.00104	6.6106e-05	0.0011
0.06887	0.45662	0.05606	0.59739								312.117	0.00194	1.35317e-05	0.00195		325.033	0.00103	6.42222e-05	0.00109
0.06926	0.46048	0.05637	0.60132								313.046	0.00193	1.3142e-05	0.00194		326.013	0.00102	6.23855e-05	0.00108
0.06965	0.46434	0.05667	0.60526								313.974	0.00191	1.27622e-05	0.00193		326.993	0.00101	6.05949e-05	0.00107
0.07005	0.46822	0.05699	0.6092								314.903	0.0019	1.23921e-05	0.00191		327.973	0.000999138	5.88495e-05	0.00106
0.07045	0.47211	0.0573	0.61315								315.832	0.00189	1.20315e-05	0.0019		328.953	0.000990215	5.71484e-05	0.00105
0.07085	0.47601	0.05761	0.61711								316.76	0.00188	1.16802e-05	0.00189		329.933	0.000981329	5.54906e-05	0.00104
0.07125	0.47992	0.05793	0.62107								317.689	0.00187	1.13379e-05	0.00188		330.913	0.000972479	5.38753e-05	0.00103
0.07165	0.48385	0.05825	0.62504								318.618	0.00185	1.10046e-05	0.00187		331.893	0.000963666	5.23014e-05	0.00102
0.07206	0.48778	0.05857	0.62901								319.546	0.00184	1.06799e-05	0.00185		332.873	0.000954891	5.07682e-05	0.00101
0.07247	0.49172	0.05889	0.63299								320.475	0.00183	1.03637e-05	0.00184		333.853	0.000946154	4.92748e-05	0.000995428
0.07288	0.49568	0.05921	0.63697								321.403	0.00182	1.00558e-05	0.00183		334.833	0.000937455	4.78202e-05	0.000985275
0.07329	0.49964	0.05954	0.64095								322.332	0.00181	9.75607e-06	0.00182		335.813	0.000928794	4.64038e-05	0.000975198
0.07371	0.50361	0.05986	0.64494								323.261	0.0018	9.46428e-06	0.0018		336.793	0.000920174	4.50245e-05	0.000965198
0.07412	0.5076	0.06019	0.64893								324.189	0.00178	9.18027e-06	0.00179		337.773	0.000911593	4.36817e-05	0.000955275
0.07455	0.51159	0.06052	0.65293								325.118	0.00177	8.90385e-06	0.00178		338.753	0.000903052	4.23745e-05	0.000945427
0.07497	0.51559	0.06085	0.65693								326.047	0.00176	8.63486e-06	0.00177		339.733	0.000894552	4.11021e-05	0.000935654
0.07539	0.5196	0.06119	0.66093								326.975	0.00175	8.37313e-06	0.00176		340.713	0.000886093	3.98637e-05	0.000925957
0.07582	0.52361	0.06152	0.66494								327.904	0.00174	8.11848e-06	0.00174		341.693	0.000877675	3.86586e-05	0.000916334
0.07625	0.52764	0.06186	0.66894								328.832	0.00172	7.87077e-06	0.00173		342.673	0.000869299	3.7486e-05	0.000906785
0.07668	0.53167	0.0622	0.67295								329.761	0.00171	7.62983e-06	0.00172		343.653	0.000860966	3.63452e-05	0.000897311
0.07712	0.53571	0.06254	0.67696								330.69	0.0017	7.39549e-06	0.00171		344.633	0.000852675	3.52354e-05	0.00088791
0.07755	0.53976	0.06288	0.68097								331.618	0.00169	7.16761e-06	0.0017		345.613	0.000844426	3.41559e-05	0.000878582
0.07799	0.54381	0.06323	0.68498								332.547	0.00168	6.94603e-06	0.00168		346.593	0.000836221	3.3106e-05	0.000869327
0.07844	0.54787	0.06358	0.68899								333.476	0.00167	6.73061e-06	0.00167		347.573	0.00082806	3.20851e-05	0.000860145
0.07888	0.55193	0.06392	0.693								334.404	0.00165	6.52119e-06	0.00166		348.553	0.000819943	3.10924e-05	0.000851035
0.07933	0.556	0.06428	0.69702								335.333	0.00164	6.31764e-06	0.00165		349.533	0.000811869	3.01272e-05	0.000841996
0.07978	0.56008	0.06463	0.70103								336.262	0.00163	6.11981e-06	0.00164		350.513	0.00080384	2.9189e-05	0.000833029
0.08023	0.56416	0.06498	0.70503								337.19	0.00162	5.92756e-06	0.00163		351.493	0.000795856	2.82771e-05	0.000824133
0.08068	0.56825	0.06534	0.70904								338.119	0.00161	5.74076e-06	0.00161		352.473	0.000787917	2.73908e-05	0.000815308
0.08114	0.57234	0.0657	0.71305								339.047	0.0016	5.55927e-06	0.0016		353.453	0.000780024	2.65295e-05	0.000806553
0.0816	0.57643	0.06606	0.71705								339.976	0.00159	5.38296e-06	0.00159		354.433	0.000772176	2.56926e-05	0.000797868
0.08207	0.58053	0.06642	0.72105								340.905	0.00157	5.21171e-06	0.00158		355.413	0.000764374	2.48795e-05	0.000789253
0.08253	0.58463	0.06679	0.72505								341.833	0.00156	5.04538e-06	0.00157		356.393	0.000756618	2.40896e-05	0.000780707
0.083	0.58874	0.06715	0.72904								342.762	0.00155	4.88387e-06	0.00156		357.373	0.000748908	2.33224e-05	0.00077223
0.08347	0.59285	0.06752	0.73303								343.691	0.00154	4.72703e-06	0.00155		358.353	0.000741245	2.25773e-05	0.000763822
0.08394	0.59696	0.06789	0.73702								344.619	0.00153	4.57476e-06	0.00153		359.333	0.000733628	2.18538e-05	0.000755482
0.08442	0.60107	0.06826	0.741								345.548	0.00152	4.42694e-06	0.00152		360.313	0.000726059	2.11512e-05	0.00074721
0.0849	0.60518	0.06864	0.74497								346.476	0.00151	4.28346e-06	0.00151		361.293	0.000718537	2.0469e-05	0.000739006
0.08538	0.6093	0.06902	0.74895								347.405	0.0015	4.14419e-06	0.0015		362.273	0.000711062	1.98069e-05	0.000730869
0.08586	0.61342	0.06939	0.75291								348.334	0.00148	4.00905e-06	0.00149		363.253	0.000703634	1.91641e-05	0.000722798
0.08635	0.61753	0.06978	0.75687								349.262	0.00147	3.87791e-06	0.00148		364.233	0.000696255	1.85403e-05	0.000714795
0.08684	0.62165	0.07016	0.76082								350.191	0.00146	3.75068e-06	0.00147		365.213	0.000688923	1.79349e-05	0.000706858
0.08733	0.62577	0.07054	0.76477								351.12	0.00145	3.62725e-06	0.00145		366.193	0.000681639	1.73475e-05	0.000698986
0.08783	0.62988	0.07093	0.76871								352.048	0.00144	3.50753e-06	0.00144		367.173	0.000674403	1.67776e-05	0.000691181
0.08832	0.634	0.07132	0.77264								352.977	0.00143	3.3914e-06	0.00143		368.153	0.000667215	1.62248e-05	0.00068344
0.08883	0.63812	0.07171	0.77656								353.905	0.00142	3.27879e-06	0.00142		369.133	0.000660076	1.56885e-05	0.000675765
0.08933	0.64223	0.0721	0.78048								354.834	0.00141	3.16959e-06	0.00141		370.113	0.000652986	1.51684e-05	0.000668154
0.08984	0.64634	0.0725	0.78438								355.763	0.0014	3.06371e-06	0.0014		371.093	0.000645944	1.4664e-05	0.000660608
0.09034	0.65045	0.0729	0.78828								356.691	0.00139	2.96106e-06	0.00139		372.073	0.00063895	1.4175e-05	0.000653125
0.09086	0.65456	0.0733	0.79216								357.62	0.00137	2.86156e-06	0.00138		373.053	0.000632006	1.37008e-05	0.000645707
0.09137	0.65866	0.0737	0.79604								358.549	0.00136	2.76513e-06	0.00137		374.033	0.00062511	1.32411e-05	0.000638351
0.09189	0.66276	0.0741	0.7999								359.477	0.00135	2.67166e-06	0.00136		375.013	0.000618263	1.27955e-05	0.000631059
0.09241	0.66685	0.07451	0.80376								360.406	0.00134	2.5811e-06	0.00134		375.993	0.000611466	1.23636e-05	0.000623829
0.09294	0.67095	0.07492	0.8076								361.334	0.00133	2.49335e-06	0.00133		376.973	0.000604717	1.19451e-05	0.000616662
0.09346	0.67503	0.07533	0.81143								362.263	0.00132	2.40833e-06	0.00132		377.953	0.000598017	1.15396e-05	0.000609557
0.09399	0.67912	0.07574	0.81525								363.192	0.00131	2.32598e-06	0.00131		378.933	0.000591367	1.11467e-05	0.000602514
0.09453	0.68319	0.07616	0.81906								364.12	0.0013	2.24621e-06	0.0013		379.913	0.000584766	1.0766e-05	0.000595532
0.09506	0.68726	0.07658	0.82285								365.049	0.00129	2.16896e-06	0.00129		380.893	0.000578214	1.03973e-05	0.000588611
0.0956	0.69133	0.077	0.82663								365.978	0.00128	2.09415e-06	0.00128		381.873	0.000571711	1.00401e-05	0.000581751
0.09614	0.69539	0.07742	0.8304								366.906	0.00127	2.02171e-06	0.00127		382.853	0.000565257	9.69426e-06	0.000574952
0.09669	0.69944	0.07784	0.83415								367.835	0.00126	1.95158e-06	0.00126		383.833	0.000558853	9.35935e-06	0.000568213
0.09723	0.70348	0.07827	0.83789								368.763	0.00125	1.88369e-06	0.00125		384.813	0.000552498	9.03507e-06	0.000561533
0.09779	0.70752	0.0787	0.84161								369.692	0.00124	1.81798e-06	0.00124		385.793	0.000546192	8.72113e-06	0.000554914
0.09834	0.71155	0.07913	0.84532								370.621	0.00123	1.75438e-06	0.00123		386.773	0.000539936	8.41724e-06	0.000548353
0.0989	0.71557	0.07957	0.84901								371.549	0.00122	1.69283e-06	0.00122		387.753	0.000533729	8.1231e-06	0.000541852
0.09946	0.71958	0.08	0.85268								372.478	0.00121	1.63328e-06	0.00121		388.733	0.00052757	7.83843e-06	0.000535409
0.10002	0.72358	0.08044	0.85634								373.407	0.0012	1.57566e-06	0.0012		389.713	0.000521461	7.56296e-06	0.000529024
0.10059	0.72757	0.08088	0.85998								374.335	0.00119	1.51992e-06	0.00119		390.693	0.000515401	7.29642e-06	0.000522698
0.10116	0.73156	0.08133	0.8636								375.264	0.00118	1.466e-06	0.00118		391.673	0.000509391	7.03855e-06	0.000516429
0.10173	0.73553	0.08177	0.86721								376.192	0.00117	1.41385e-06	0.00117		392.653	0.000503429	6.7891e-06	0.000510218
0.10231	0.73949	0.08222	0.87079								377.121	0.00116	1.36342e-06	0.00116		393.633	0.000497516	6.54782e-06	0.000504064
0.10289	0.74344	0.08267	0.87436								378.05	0.00115	1.31465e-06	0.00115		394.613	0.000491652	6.31446e-06	0.000497966
0.10347	0.74737	0.08313	0.87791								378.978	0.00114	1.2675e-06	0.00114		395.593	0.000485836	6.0888e-06	0.000491925
0.10406	0.7513	0.08358	0.88143								379.907	0.00113	1.22191e-06	0.00113		396.573	0.00048007	5.8706e-06	0.00048594
0.10465	0.75521	0.08404	0.88494								380.836	0.00112	1.17785e-06	0.00112		397.553	0.000474352	5.65964e-06	0.000480012
0.10524	0.75911	0.0845	0.88843								381.764	0.00111	1.13525e-06	0.00111		398.533	0.000468683	5.45569e-06	0.000474138
0.10584	0.763	0.08497	0.89189								382.693	0.0011	1.09409e-06	0.0011		399.513	0.000463062	5.25856e-06	0.00046832
0.10644	0.76687	0.08543	0.89534								383.622	0.00109	1.05431e-06	0.00109		400.493	0.000457489	5.06804e-06	0.000462557
0.10705	0.77073	0.0859	0.89876								384.55	0.00108	1.01588e-06	0.00108		401.473	0.000451965	4.88391e-06	0.000456849
0.10765	0.77457	0.08637	0.90216								385.479	0.00107	9.78746e-07	0.00107		402.453	0.000446488	4.706e-06	0.000451194
0.10826	0.7784	0.08685	0.90554								386.407	0.00106	9.42876e-07	0.00106		403.433	0.00044106	4.5341e-06	0.000445594
0.10888	0.78221	0.08733	0.90889								387.336	0.00105	9.08227e-07	0.00105		404.413	0.00043568	4.36803e-06	0.000440048
0.10949	0.78601	0.0878	0.91222								388.265	0.00104	8.74763e-07	0.00104		405.393	0.000430347	4.20762e-06	0.000434555
0.11011	0.78979	0.08829	0.91553								389.193	0.00103	8.42447e-07	0.00103		406.373	0.000425062	4.05268e-06	0.000429115
0.11074	0.79355	0.08877	0.91881								390.122	0.00102	8.11243e-07	0.00102		407.353	0.000419825	3.90305e-06	0.000423728
0.11137	0.7973	0.08926	0.92207								391.051	0.00101	7.81115e-07	0.00101		408.333	0.000414635	3.75856e-06	0.000418393
0.112	0.80103	0.08975	0.9253								391.979	0.001	7.5203e-07	0.00101		409.313	0.000409492	3.61904e-06	0.000413111
0.11263	0.80474	0.09024	0.92851								392.908	0.00099574	7.23954e-07	0.000996464		410.293	0.000404396	3.48435e-06	0.00040788
0.11327	0.80843	0.09073	0.93169								393.836	0.000986691	6.96856e-07	0.000987388		411.273	0.000399347	3.35434e-06	0.000402701
0.11391	0.8121	0.09123	0.93484								394.765	0.000977691	6.70705e-07	0.000978362		412.253	0.000394344	3.22884e-06	0.000397573
0.11456	0.81576	0.09173	0.93797								395.694	0.000968743	6.45469e-07	0.000969388		413.233	0.000389389	3.10772e-06	0.000392497
0.11521	0.81939	0.09224	0.94107								396.622	0.000959845	6.21121e-07	0.000960466		414.213	0.00038448	2.99084e-06	0.00038747
0.11586	0.82301	0.09274	0.94414								397.551	0.000950997	5.9763e-07	0.000951595		415.193	0.000379616	2.87806e-06	0.000382495
0.11652	0.8266	0.09325	0.94719								398.48	0.0009422	5.7497e-07	0.000942775		416.173	0.000374799	2.76925e-06	0.000377569
0.11718	0.83018	0.09376	0.9502								399.408	0.000933455	5.53113e-07	0.000934008		417.153	0.000370028	2.66428e-06	0.000372693
0.11784	0.83373	0.09428	0.95319								400.337	0.00092476	5.32033e-07	0.000925292		418.133	0.000365303	2.56303e-06	0.000367866
0.11851	0.83726	0.09479	0.95615								401.265	0.000916117	5.11705e-07	0.000916629		419.113	0.000360623	2.46538e-06	0.000363088
0.11918	0.84077	0.09531	0.95908								402.194	0.000907525	4.92104e-07	0.000908017		420.093	0.000355988	2.37121e-06	0.00035836
0.11986	0.84426	0.09584	0.96198								403.123	0.000898984	4.73205e-07	0.000899457		421.073	0.000351399	2.2804e-06	0.000353679
0.12054	0.84772	0.09636	0.96485								404.051	0.000890495	4.54987e-07	0.00089095		422.053	0.000346854	2.19285e-06	0.000349047
0.12122	0.85116	0.09689	0.96768								404.98	0.000882058	4.37426e-07	0.000882495		423.033	0.000342354	2.10844e-06	0.000344463
0.12191	0.85458	0.09742	0.97049								405.909	0.000873672	4.205e-07	0.000874092		424.013	0.000337899	2.02707e-06	0.000339926
0.1226	0.85797	0.09796	0.97326								406.837	0.000865338	4.04189e-07	0.000865742		424.993	0.000333488	1.94865e-06	0.000335437
0.1233	0.86134	0.0985	0.97601								407.766	0.000857055	3.88471e-07	0.000857444		425.973	0.000329121	1.87307e-06	0.000330994
0.124	0.86468	0.09904	0.97872								408.694	0.000848825	3.73326e-07	0.000849198		426.953	0.000324798	1.80024e-06	0.000326598
0.1247	0.868	0.09958	0.9814								409.623	0.000840646	3.58736e-07	0.000841005		427.933	0.000320519	1.73006e-06	0.000322249
0.12541	0.87129	0.10013	0.98404								410.552	0.000832519	3.44682e-07	0.000832864		428.913	0.000316283	1.66245e-06	0.000317945
0.12612	0.87456	0.10068	0.98666								411.48	0.000824445	3.31144e-07	0.000824776		429.893	0.00031209	1.59732e-06	0.000313687
0.12683	0.8778	0.10123	0.98923								412.409	0.000816422	3.18107e-07	0.00081674		430.873	0.00030794	1.53459e-06	0.000309475
0.12755	0.88102	0.10178	0.99178								413.338	0.000808451	3.05551e-07	0.000808757		431.853	0.000303833	1.47417e-06	0.000305307
0.12827	0.8842	0.10234	0.99429								414.266	0.000800533	2.93462e-07	0.000800826		432.833	0.000299769	1.41599e-06	0.000301185
0.129	0.88736	0.1029	0.99677								415.195	0.000792666	2.81823e-07	0.000792948		433.813	0.000295747	1.35996e-06	0.000297107
0.12973	0.89049	0.10347	0.99921								416.123	0.000784852	2.70618e-07	0.000785122		434.793	0.000291767	1.30602e-06	0.000293073
0.13047	0.8936	0.10404	1.00161								417.052	0.000777089	2.59832e-07	0.000777349		435.773	0.000287828	1.25409e-06	0.000289082
0.13121	0.89667	0.10461	1.00398								417.981	0.000769379	2.49452e-07	0.000769628		436.753	0.000283932	1.2041e-06	0.000285136
0.13195	0.89972	0.10518	1.00632								418.909	0.000761721	2.39462e-07	0.00076196		437.733	0.000280076	1.15599e-06	0.000281232
0.1327	0.90273	0.10576	1.00861								419.838	0.000754115	2.29848e-07	0.000754344		438.713	0.000276262	1.10969e-06	0.000277372
0.13345	0.90572	0.10634	1.01087								420.767	0.000746561	2.20599e-07	0.000746781		439.693	0.000272489	1.06513e-06	0.000273554
0.13421	0.90868	0.10692	1.0131								421.695	0.000739058	2.11701e-07	0.00073927		440.673	0.000268756	1.02226e-06	0.000269779
0.13497	0.9116	0.10751	1.01528								422.624	0.000731608	2.03141e-07	0.000731812		441.653	0.000265064	9.81018e-07	0.000266045
0.13574	0.9145	0.1081	1.01743								423.553	0.00072421	1.94907e-07	0.000724405		442.633	0.000261412	9.41343e-07	0.000262353
0.13651	0.91736	0.10869	1.01954								424.481	0.000716864	1.86989e-07	0.000717051		443.613	0.000257799	9.0318e-07	0.000258703
0.13728	0.92019	0.10929	1.02162								425.41	0.00070957	1.79374e-07	0.000709749		444.593	0.000254227	8.66477e-07	0.000255093
0.13806	0.92299	0.10989	1.02365								426.338	0.000702327	1.72052e-07	0.000702499		445.573	0.000250693	8.31181e-07	0.000251524
0.13884	0.92576	0.11049	1.02565								427.267	0.000695137	1.65012e-07	0.000695302		446.553	0.000247199	7.97243e-07	0.000247996
0.13963	0.9285	0.1111	1.0276								428.196	0.000687998	1.58245e-07	0.000688156		447.533	0.000243744	7.64612e-07	0.000244508
0.14042	0.9312	0.11171	1.02952								429.124	0.00068091	1.5174e-07	0.000681062		448.513	0.000240327	7.33243e-07	0.00024106
0.14122	0.93387	0.11232	1.0314								430.053	0.000673874	1.45487e-07	0.00067402		449.493	0.000236948	7.0309e-07	0.000237651
0.14202	0.93651	0.11294	1.03324								430.982	0.00066689	1.39479e-07	0.00066703		450.473	0.000233608	6.74109e-07	0.000234282
0.14282	0.93911	0.11356	1.03503								431.91	0.000659957	1.33705e-07	0.000660091		451.453	0.000230305	6.46256e-07	0.000230951
0.14363	0.94168	0.11418	1.03679								432.839	0.000653076	1.28157e-07	0.000653204		452.433	0.00022704	6.19492e-07	0.000227659
0.14445	0.94421	0.1148	1.03851								433.767	0.000646246	1.22827e-07	0.000646368		453.413	0.000223812	5.93777e-07	0.000224406
0.14526	0.94671	0.11544	1.04018								434.696	0.000639466	1.17707e-07	0.000639584		454.393	0.000220621	5.69071e-07	0.00022119
0.14609	0.94917	0.11607	1.04182								435.625	0.000632738	1.12789e-07	0.000632851		455.373	0.000217467	5.45338e-07	0.000218012
0.14692	0.9516	0.11671	1.04341								436.553	0.000626061	1.08066e-07	0.000626169		456.353	0.000214349	5.22542e-07	0.000214872
0.14775	0.95399	0.11735	1.04496								437.482	0.000619435	1.0353e-07	0.000619539		457.333	0.000211267	5.00648e-07	0.000211768
0.14859	0.95635	0.11799	1.04647								438.411	0.00061286	9.91745e-08	0.000612959		458.313	0.000208222	4.79623e-07	0.000208701
0.14943	0.95867	0.11864	1.04794								439.339	0.000606335	9.49929e-08	0.00060643		459.293	0.000205212	4.59435e-07	0.000205671
0.15028	0.96095	0.11929	1.04936								440.268	0.00059986	9.09784e-08	0.000599951		460.273	0.000202237	4.40052e-07	0.000202677
0.15113	0.9632	0.11994	1.05075								441.196	0.000593436	8.71249e-08	0.000593523		461.253	0.000199298	4.21445e-07	0.000199719
0.15199	0.96541	0.1206	1.05209								442.125	0.000587063	8.34262e-08	0.000587146		462.233	0.000196393	4.03583e-07	0.000196797
0.15285	0.96758	0.12126	1.05338								443.054	0.000580739	7.98766e-08	0.000580819		463.213	0.000193523	3.86439e-07	0.000193909
0.15372	0.96972	0.12193	1.05464								443.982	0.000574466	7.64704e-08	0.000574542		464.193	0.000190687	3.69987e-07	0.000191057
0.15459	0.97181	0.1226	1.05585								444.911	0.000568242	7.32021e-08	0.000568315		465.173	0.000187885	3.54199e-07	0.00018824
0.15546	0.97387	0.12327	1.05701								445.84	0.000562068	7.00664e-08	0.000562138		466.153	0.000185117	3.3905e-07	0.000185456
0.15634	0.97589	0.12395	1.05814								446.768	0.000555944	6.70584e-08	0.000556011		467.133	0.000182383	3.24517e-07	0.000182707
0.15723	0.97787	0.12463	1.05921								447.697	0.000549869	6.41731e-08	0.000549933		468.113	0.000179681	3.10575e-07	0.000179992
0.15812	0.97981	0.12531	1.06025								448.625	0.000543843	6.14058e-08	0.000543905		469.093	0.000177013	2.97203e-07	0.00017731
0.15902	0.98171	0.126	1.06124								449.554	0.000537867	5.8752e-08	0.000537925		470.073	0.000174377	2.84377e-07	0.000174661
0.15992	0.98358	0.12669	1.06219								450.483	0.000531939	5.62073e-08	0.000531995		471.053	0.000171774	2.72078e-07	0.000172046
0.16083	0.9854	0.12739	1.06309								451.411	0.00052606	5.37674e-08	0.000526114		472.033	0.000169202	2.60284e-07	0.000169463
0.16174	0.98718	0.12808	1.06395								452.34	0.00052023	5.14282e-08	0.000520282		473.013	0.000166663	2.48976e-07	0.000166912
0.16266	0.98892	0.12879	1.06476								453.269	0.000514449	4.9186e-08	0.000514498		473.993	0.000164155	2.38136e-07	0.000164393
0.16358	0.99063	0.12949	1.06553								454.197	0.000508716	4.70368e-08	0.000508763		474.973	0.000161678	2.27745e-07	0.000161906
0.16451	0.99229	0.1302	1.06625								455.126	0.000503031	4.4977e-08	0.000503076		475.953	0.000159232	2.17785e-07	0.00015945
0.16544	0.99391	0.13092	1.06692								456.054	0.000497394	4.30031e-08	0.000497437		476.933	0.000156818	2.0824e-07	0.000157026
0.16638	0.99549	0.13164	1.06756								456.983	0.000491804	4.11118e-08	0.000491845		477.913	0.000154433	1.99093e-07	0.000154632
0.16732	0.99702	0.13236	1.06814								457.912	0.000486262	3.92997e-08	0.000486302		478.893	0.000152079	1.90329e-07	0.000152269
0.16827	0.99852	0.13309	1.06868								458.84	0.000480768	3.75637e-08	0.000480806		479.873	0.000149754	1.81932e-07	0.000149936
0.16922	0.99997	0.13381	1.06918								459.769	0.000475321	3.59008e-08	0.000475357		480.853	0.00014746	1.73888e-07	0.000147634
0.17018	1.00139	0.13455	1.06963								460.698	0.000469921	3.43082e-08	0.000469955		481.833	0.000145194	1.66183e-07	0.000145361
0.17115	1.00276	0.13529	1.07003								461.626	0.000464568	3.27829e-08	0.000464601		482.813	0.000142958	1.58804e-07	0.000143117
0.17212	1.00409	0.13603	1.07039								462.555	0.000459262	3.13223e-08	0.000459293		483.793	0.000140751	1.51737e-07	0.000140903
0.17309	1.00537	0.13678	1.0707								463.483	0.000454002	2.99238e-08	0.000454032		484.773	0.000138572	1.4497e-07	0.000138717
0.17408	1.00661	0.13753	1.07097								464.412	0.000448788	2.85849e-08	0.000448816		485.753	0.000136422	1.3849e-07	0.00013656
0.17506	1.00781	0.13828	1.07119								465.341	0.00044362	2.73032e-08	0.000443648		486.733	0.000134299	1.32287e-07	0.000134431
0.17606	1.00897	0.13904	1.07136								466.269	0.000438498	2.60763e-08	0.000438524		487.713	0.000132204	1.2635e-07	0.000132331
0.17705	1.01009	0.1398	1.07149								467.198	0.000433422	2.49021e-08	0.000433447		488.693	0.000130137	1.20666e-07	0.000130258
0.17806	1.01116	0.14057	1.07157								468.127	0.000428392	2.37784e-08	0.000428415		489.673	0.000128097	1.15227e-07	0.000128213
0.17907	1.01219	0.14134	1.0716								469.055	0.000423406	2.27032e-08	0.000423429		490.653	0.000126084	1.10022e-07	0.000126194
0.18008	1.01317	0.14212	1.07159								469.984	0.000418466	2.16744e-08	0.000418487		491.633	0.000124098	1.05041e-07	0.000124203
0.1811	1.01411	0.1429	1.07153								470.913	0.00041357	2.06902e-08	0.000413591		492.613	0.000122138	1.00276e-07	0.000122239
0.18213	1.01501	0.14368	1.07143								471.841	0.000408719	1.97487e-08	0.000408739		493.593	0.000120205	9.57174e-08	0.0001203
0.18316	1.01586	0.14447	1.07128								472.77	0.000403912	1.88481e-08	0.000403931		494.573	0.000118297	9.13568e-08	0.000118388
0.1842	1.01667	0.14526	1.07108								473.698	0.00039915	1.79869e-08	0.000399168		495.553	0.000116415	8.71862e-08	0.000116502
0.18525	1.01743	0.14606	1.07084								474.627	0.000394431	1.71633e-08	0.000394449		496.533	0.000114558	8.31976e-08	0.000114642
0.18629	1.01815	0.14686	1.07055								475.556	0.000389757	1.63758e-08	0.000389773		497.513	0.000112727	7.93835e-08	0.000112806
0.18735	1.01883	0.14767	1.07021								476.484	0.000385125	1.56228e-08	0.000385141		498.493	0.00011092	7.57366e-08	0.000110996
0.18841	1.01946	0.14848	1.06983								477.413	0.000380537	1.4903e-08	0.000380552		499.473	0.000109138	7.22501e-08	0.000109211
0.18948	1.02005	0.14929	1.0694								478.342	0.000375992	1.42149e-08	0.000376006		500.453	0.000107381	6.89171e-08	0.00010745
0.19056	1.02059	0.15011	1.06892								479.27	0.00037149	1.35573e-08	0.000371503		501.433	0.000105647	6.57313e-08	0.000105713
0.19164	1.02109	0.15094	1.0684								480.199	0.00036703	1.29288e-08	0.000367043		502.413	0.000103938	6.26865e-08	0.000104001
0.19273	1.02154	0.15176	1.06783								481.127	0.000362613	1.23282e-08	0.000362625		503.393	0.000102252	5.97768e-08	0.000102312
0.19382	1.02195	0.15259	1.06722								482.056	0.000358238	1.17544e-08	0.00035825		504.373	0.000100589	5.69963e-08	0.000100646
0.19492	1.02232	0.15343	1.06656								482.985	0.000353904	1.12061e-08	0.000353916		505.353	9.89501e-05	5.43398e-08	9.90044e-05
0.19602	1.02263	0.15427	1.06586								483.913	0.000349613	1.06824e-08	0.000349623		506.333	9.73335e-05	5.18019e-08	9.73853e-05
0.19713	1.02291	0.15512	1.0651								484.842	0.000345363	1.01821e-08	0.000345373		507.313	9.57396e-05	4.93776e-08	9.5789e-05
0.19825	1.02314	0.15597	1.06431								485.771	0.000341153	9.70429e-09	0.000341163		508.293	9.41681e-05	4.7062e-08	9.42152e-05
0.19937	1.02332	0.15683	1.06346								486.699	0.000336985	9.24798e-09	0.000336995		509.273	9.26188e-05	4.48506e-08	9.26636e-05
0.20051	1.02346	0.15769	1.06257								487.628	0.000332858	8.81225e-09	0.000332867		510.253	9.10913e-05	4.27387e-08	9.11341e-05
0.20164	1.02356	0.15856	1.06164								488.556	0.000328771	8.39622e-09	0.000328779		511.233	8.95856e-05	4.07223e-08	8.96263e-05
0.20279	1.02361	0.15942	1.06066								489.485	0.000324724	7.99904e-09	0.000324732		512.213	8.81012e-05	3.8797e-08	8.814e-05
0.20393	1.02361	0.1603	1.05963								490.414	0.000320717	7.61989e-09	0.000320725		513.193	8.6638e-05	3.69591e-08	8.6675e-05
0.20509	1.02357	0.16118	1.05856								491.342	0.00031675	7.25799e-09	0.000316757		514.173	8.51958e-05	3.52048e-08	8.5231e-05
0.20625	1.02348	0.16206	1.05745								492.271	0.000312822	6.91259e-09	0.000312829		515.153	8.37743e-05	3.35304e-08	8.38078e-05
0.20742	1.02335	0.16295	1.05629								493.2	0.000308934	6.58298e-09	0.00030894		516.133	8.23733e-05	3.19324e-08	8.24052e-05
0.2086	1.02318	0.16385	1.05508								494.128	0.000305084	6.26846e-09	0.00030509		517.113	8.09925e-05	3.04075e-08	8.10229e-05
0.20978	1.02296	0.16474	1.05383								495.057	0.000301273	5.96838e-09	0.000301279		518.093	7.96318e-05	2.89525e-08	7.96607e-05
0.21097	1.02269	0.16565	1.05254								495.985	0.000297501	5.6821e-09	0.000297507		519.073	7.82908e-05	2.75644e-08	7.83184e-05
0.21217	1.02238	0.16656	1.0512								496.914	0.000293767	5.40901e-09	0.000293772		520.053	7.69694e-05	2.62403e-08	7.69956e-05
0.21337	1.02202	0.16747	1.04981								497.843	0.000290071	5.14854e-09	0.000290076		521.033	7.56673e-05	2.49772e-08	7.56923e-05
0.21458	1.02162	0.16839	1.04839								498.771	0.000286413	4.90013e-09	0.000286418		522.013	7.43844e-05	2.37726e-08	7.44081e-05
0.2158	1.02118	0.16932	1.04692								499.7	0.000282792	4.66324e-09	0.000282796		522.993	7.31203e-05	2.26238e-08	7.31429e-05
0.21702	1.02069	0.17024	1.0454								500.629	0.000279208	4.43736e-09	0.000279213		523.973	7.18749e-05	2.15284e-08	7.18964e-05
0.21825	1.02016	0.17118	1.04384								501.557	0.000275662	4.22201e-09	0.000275666		524.953	7.06479e-05	2.04839e-08	7.06684e-05
0.21949	1.01958	0.17212	1.04224								502.486	0.000272152	4.0167e-09	0.000272156		525.933	6.94392e-05	1.94882e-08	6.94587e-05
0.22073	1.01895	0.17306	1.04059								503.414	0.000268678	3.82101e-09	0.000268682		526.913	6.82485e-05	1.85391e-08	6.8267e-05
0.22198	1.01829	0.17401	1.03891								504.343	0.000265241	3.63449e-09	0.000265245		527.893	6.70756e-05	1.76344e-08	6.70932e-05
0.22324	1.01757	0.17496	1.03717								505.272	0.00026184	3.45673e-09	0.000261843		528.873	6.59202e-05	1.67721e-08	6.5937e-05
0.22451	1.01682	0.17593	1.0354								506.2	0.000258474	3.28734e-09	0.000258478		529.853	6.47822e-05	1.59505e-08	6.47982e-05
0.22578	1.01602	0.17689	1.03358								507.129	0.000255144	3.12594e-09	0.000255148		530.833	6.36614e-05	1.51676e-08	6.36766e-05
0.22706	1.01517	0.17786	1.03173								508.058	0.00025185	2.97217e-09	0.000251853		531.813	6.25575e-05	1.44216e-08	6.25719e-05
0.22835	1.01428	0.17884	1.02983								508.986	0.00024859	2.82568e-09	0.000248593		532.793	6.14704e-05	1.3711e-08	6.14841e-05
0.22965	1.01335	0.17982	1.02788								509.915	0.000245365	2.68615e-09	0.000245368		533.773	6.03998e-05	1.30341e-08	6.04128e-05
0.23095	1.01238	0.1808	1.0259								510.843	0.000242174	2.55326e-09	0.000242177		534.753	5.93455e-05	1.23894e-08	5.93579e-05
0.23226	1.01136	0.1818	1.02388								511.772	0.000239018	2.4267e-09	0.00023902		535.733	5.83074e-05	1.17754e-08	5.83191e-05
0.23357	1.0103	0.1828	1.02181								512.701	0.000235895	2.30618e-09	0.000235898		536.713	5.72851e-05	1.11907e-08	5.72963e-05
0.2349	1.00919	0.1838	1.01971								513.629	0.000232807	2.19144e-09	0.000232809		537.693	5.62786e-05	1.0634e-08	5.62893e-05
0.23623	1.00804	0.18481	1.01756								514.558	0.000229752	2.0822e-09	0.000229754		538.673	5.52877e-05	1.01039e-08	5.52978e-05
0.23757	1.00685	0.18582	1.01537								515.487	0.000226729	1.9782e-09	0.000226731		539.653	5.4312e-05	9.59938e-09	5.43216e-05
0.23892	1.00561	0.18684	1.01314								516.415	0.00022374	1.87922e-09	0.000223742		540.633	5.33516e-05	9.1191e-09	5.33607e-05
0.24027	1.00434	0.18787	1.01088								517.344	0.000220784	1.78501e-09	0.000220786		541.613	5.2406e-05	8.66198e-09	5.24147e-05
0.24164	1.00302	0.1889	1.00857								518.273	0.00021786	1.69536e-09	0.000217862		542.593	5.14752e-05	8.22696e-09	5.14834e-05
0.243	1.00165	0.18993	1.00623								519.201	0.000214968	1.61005e-09	0.00021497		543.573	5.0559e-05	7.813e-09	5.05668e-05
0.24438	1.00025	0.19098	1.00384								520.13	0.000212109	1.52888e-09	0.00021211		544.553	4.96571e-05	7.41914e-09	4.96645e-05
0.24576	0.9988	0.19203	1.00142								521.058	0.000209281	1.45166e-09	0.000209282		545.533	4.87694e-05	7.04443e-09	4.87765e-05
0.24716	0.99731	0.19308	0.99896								521.987	0.000206484	1.37821e-09	0.000206485		546.513	4.78958e-05	6.68798e-09	4.79025e-05
0.24856	0.99578	0.19414	0.99646								522.916	0.000203718	1.30834e-09	0.00020372		547.493	4.70359e-05	6.34893e-09	4.70423e-05
0.24997	0.99421	0.1952	0.99393								523.844	0.000200984	1.24189e-09	0.000200985		548.473	4.61897e-05	6.02647e-09	4.61958e-05
0.25139	0.9926	0.19627	0.99135								524.773	0.00019828	1.1787e-09	0.000198281		549.453	4.5357e-05	5.71981e-09	4.53627e-05
0.25281	0.99095	0.19735	0.98874								525.702	0.000195607	1.11862e-09	0.000195608		550.433	4.45375e-05	5.42822e-09	4.4543e-05
0.25425	0.98925	0.19843	0.9861								526.63	0.000192964	1.06149e-09	0.000192965		551.413	4.37312e-05	5.15099e-09	4.37363e-05
0.25569	0.98752	0.19952	0.98341								527.559	0.000190351	1.00718e-09	0.000190352		552.393	4.29378e-05	4.88742e-09	4.29427e-05
0.25714	0.98574	0.20062	0.9807								528.487	0.000187767	9.55554e-10	0.000187768		553.373	4.21571e-05	4.63688e-09	4.21618e-05
0.25859	0.98393	0.20172	0.97794								529.416	0.000185213	9.06486e-10	0.000185214		554.353	4.1389e-05	4.39875e-09	4.13934e-05
0.26006	0.98207	0.20282	0.97515								530.345	0.000182688	8.59853e-10	0.000182689		555.333	4.06334e-05	4.17242e-09	4.06376e-05
0.26154	0.98018	0.20394	0.97232								531.273	0.000180193	8.15538e-10	0.000180194		556.313	3.989e-05	3.95735e-09	3.98939e-05
0.26302	0.97825	0.20505	0.96946								532.202	0.000177726	7.73431e-10	0.000177726		557.293	3.91587e-05	3.753e-09	3.91624e-05
0.26451	0.97627	0.20618	0.96657								533.131	0.000175287	7.33425e-10	0.000175288		558.273	3.84393e-05	3.55884e-09	3.84428e-05
0.26601	0.97426	0.20731	0.96364								534.059	0.000172877	6.9542e-10	0.000172877		559.253	3.77316e-05	3.37439e-09	3.7735e-05
0.26752	0.97221	0.20845	0.96068								534.988	0.000170494	6.59319e-10	0.000170495		560.233	3.70356e-05	3.19918e-09	3.70388e-05
0.26904	0.97012	0.20959	0.95769								535.916	0.00016814	6.25031e-10	0.000168141		561.213	3.63509e-05	3.03277e-09	3.6354e-05
0.27056	0.96799	0.21075	0.95466								536.845	0.000165813	5.92467e-10	0.000165814		562.193	3.56776e-05	2.87472e-09	3.56805e-05
0.27209	0.96583	0.2119	0.9516								537.774	0.000163513	5.61545e-10	0.000163514		563.173	3.50153e-05	2.72465e-09	3.50181e-05
0.27364	0.96363	0.21306	0.9485								538.702	0.00016124	5.32184e-10	0.000161241		564.153	3.43641e-05	2.58215e-09	3.43667e-05
0.27519	0.96139	0.21423	0.94538								539.631	0.000158995	5.04309e-10	0.000158995		565.133	3.37236e-05	2.44686e-09	3.37261e-05
0.27675	0.95911	0.21541	0.94222								540.56	0.000156775	4.77846e-10	0.000156776		566.113	3.30938e-05	2.31843e-09	3.30961e-05
0.27832	0.9568	0.21659	0.93904								541.488	0.000154582	4.52727e-10	0.000154583		567.093	3.24745e-05	2.19652e-09	3.24767e-05
0.2799	0.95445	0.21778	0.93582								542.417	0.000152415	4.28887e-10	0.000152416		568.073	3.18656e-05	2.08081e-09	3.18677e-05
0.28148	0.95206	0.21897	0.93257								543.345	0.000150274	4.06262e-10	0.000150275		569.053	3.12668e-05	1.971e-09	3.12688e-05
0.28308	0.94964	0.22018	0.92929								544.274	0.000148159	3.84792e-10	0.000148159		570.033	3.06782e-05	1.86681e-09	3.068e-05
0.28469	0.94718	0.22139	0.92599								545.203	0.000146069	3.64422e-10	0.000146069		571.013	3.00994e-05	1.76794e-09	3.01012e-05
0.2863	0.94469	0.2226	0.92265								546.131	0.000144004	3.45095e-10	0.000144004		571.993	2.95305e-05	1.67415e-09	2.95321e-05
0.28793	0.94217	0.22382	0.91928								547.06	0.000141964	3.26762e-10	0.000141964		572.973	2.89711e-05	1.58517e-09	2.89727e-05
0.28955	0.9396	0.22505	0.91589								547.989	0.000139949	3.09371e-10	0.000139949		573.953	2.84213e-05	1.50077e-09	2.84228e-05
0.2912	0.93701	0.22628	0.91247								548.917	0.000137958	2.92878e-10	0.000137958		574.933	2.78808e-05	1.42073e-09	2.78823e-05
0.29285	0.93438	0.22753	0.90902								549.846	0.000135991	2.77237e-10	0.000135992		575.913	2.73496e-05	1.34482e-09	2.73509e-05
0.29451	0.93171	0.22877	0.90554								550.774	0.000134049	2.62405e-10	0.000134049		576.893	2.68274e-05	1.27284e-09	2.68287e-05
0.29618	0.92902	0.23003	0.90204								551.703	0.00013213	2.48342e-10	0.00013213		577.873	2.63142e-05	1.20459e-09	2.63154e-05
0.29786	0.92629	0.23129	0.89851								552.632	0.000130235	2.35009e-10	0.000130235		578.853	2.58098e-05	1.13989e-09	2.5811e-05
0.29954	0.92353	0.23256	0.89496								553.56	0.000128363	2.22371e-10	0.000128363		579.833	2.53141e-05	1.07856e-09	2.53152e-05
0.30125	0.92073	0.23384	0.89138								554.489	0.000126514	2.10391e-10	0.000126515		580.813	2.4827e-05	1.02043e-09	2.4828e-05
0.30296	0.91791	0.23512	0.88777								555.418	0.000124689	1.99037e-10	0.000124689		581.793	2.43483e-05	9.6533e-10	2.43493e-05
0.30467	0.91505	0.23641	0.88414								556.346	0.000122885	1.88278e-10	0.000122886		582.773	2.38779e-05	9.13118e-10	2.38788e-05
0.3064	0.91216	0.23771	0.88049								557.275	0.000121105	1.78082e-10	0.000121105		583.753	2.34157e-05	8.63644e-10	2.34166e-05
0.30813	0.90924	0.23901	0.87681								558.203	0.000119346	1.68422e-10	0.000119346		584.733	2.29616e-05	8.1677e-10	2.29624e-05
0.30988	0.90629	0.24032	0.87311								559.132	0.00011761	1.59271e-10	0.00011761		585.713	2.25154e-05	7.72363e-10	2.25162e-05
0.31164	0.90331	0.24164	0.86938								560.061	0.000115895	1.50602e-10	0.000115895		586.693	2.2077e-05	7.30298e-10	2.20778e-05
0.31341	0.9003	0.24297	0.86563								560.989	0.000114202	1.4239e-10	0.000114202		587.673	2.16464e-05	6.90455e-10	2.16471e-05
0.31518	0.89726	0.2443	0.86186								561.918	0.00011253	1.34613e-10	0.000112531		588.653	2.12233e-05	6.52722e-10	2.12239e-05
0.31697	0.89419	0.24564	0.85807								562.847	0.00011088	1.27249e-10	0.00011088		589.633	2.08077e-05	6.16989e-10	2.08083e-05
0.31876	0.89109	0.24699	0.85426								563.775	0.00010925	1.20275e-10	0.00010925		590.613	2.03994e-05	5.83155e-10	2.04e-05
0.32058	0.88796	0.24834	0.85043								564.704	0.000107642	1.13673e-10	0.000107642		591.593	1.99984e-05	5.51121e-10	1.9999e-05
0.3224	0.88481	0.24971	0.84657								565.633	0.000106053	1.07422e-10	0.000106053		592.573	1.96045e-05	5.20796e-10	1.9605e-05
0.32422	0.88163	0.25108	0.8427								566.561	0.000104485	1.01505e-10	0.000104485		593.553	1.92176e-05	4.9209e-10	1.92181e-05
0.32606	0.87842	0.25245	0.83881								567.49	0.000102937	9.59046e-11	0.000102937		594.533	1.88377e-05	4.64921e-10	1.88382e-05
0.32791	0.87518	0.25384	0.83489								568.418	0.000101409	9.06042e-11	0.000101409		595.513	1.84645e-05	4.39208e-10	1.8465e-05
0.32977	0.87192	0.25523	0.83096								569.347	9.99011e-05	8.55884e-11	9.99012e-05		596.493	1.80981e-05	4.14876e-10	1.80985e-05
0.33163	0.86863	0.25663	0.82701								570.276	9.84123e-05	8.08423e-11	9.84124e-05		597.473	1.77382e-05	3.91853e-10	1.77386e-05
0.33352	0.86532	0.25804	0.82305								571.204	9.69429e-05	7.63518e-11	9.69429e-05		598.453	1.73849e-05	3.70071e-10	1.73852e-05
0.33541	0.86198	0.25945	0.81906								572.133	9.54925e-05	7.21037e-11	9.54926e-05		599.433	1.70379e-05	3.49465e-10	1.70382e-05
0.33731	0.85862	0.26088	0.81506								573.062	9.4061e-05	6.80853e-11	9.40611e-05		600.413	1.66972e-05	3.29974e-10	1.66975e-05
0.33923	0.85523	0.26231	0.81104								573.99	9.26483e-05	6.42845e-11	9.26483e-05		601.393	1.63626e-05	3.11539e-10	1.6363e-05
0.34115	0.85182	0.26375	0.80701								574.919	9.1254e-05	6.06899e-11	9.12541e-05		602.373	1.60342e-05	2.94105e-10	1.60345e-05
0.34308	0.84838	0.2652	0.80296								575.847	8.9878e-05	5.72907e-11	8.98781e-05		603.353	1.57118e-05	2.77619e-10	1.57121e-05
0.34502	0.84492	0.26666	0.79889								576.776	8.85202e-05	5.40766e-11	8.85203e-05		604.333	1.53952e-05	2.62031e-10	1.53955e-05
0.34698	0.84144	0.26811	0.79481								577.705	8.71803e-05	5.10378e-11	8.71803e-05		605.313	1.50845e-05	2.47294e-10	1.50847e-05
0.34895	0.83793	0.26959	0.79072								578.633	8.58581e-05	4.8165e-11	8.58582e-05		606.293	1.47795e-05	2.33363e-10	1.47797e-05
0.35093	0.83441	0.27107	0.78661								579.562	8.45535e-05	4.54494e-11	8.45535e-05		607.273	1.448e-05	2.20194e-10	1.44802e-05
0.35291	0.83086	0.27255	0.78249								580.491	8.32662e-05	4.28828e-11	8.32662e-05		608.253	1.41861e-05	2.07748e-10	1.41863e-05
0.35492	0.82729	0.27405	0.77836								581.419	8.19961e-05	4.04571e-11	8.19961e-05		609.233	1.38977e-05	1.95987e-10	1.38979e-05
0.35693	0.8237	0.27556	0.77421								582.348	8.07429e-05	3.81649e-11	8.07429e-05		610.213	1.36145e-05	1.84872e-10	1.36147e-05
0.35895	0.82009	0.27706	0.77005								583.276	7.95066e-05	3.5999e-11	7.95066e-05		611.193	1.33367e-05	1.74371e-10	1.33368e-05
0.36099	0.81646	0.27859	0.76588								584.205	7.82868e-05	3.39527e-11	7.82868e-05		612.173	1.3064e-05	1.6445e-10	1.30641e-05
0.36304	0.81281	0.28012	0.7617								585.134	7.70835e-05	3.20195e-11	7.70835e-05		613.153	1.27964e-05	1.55078e-10	1.27965e-05
0.3651	0.80914	0.28165	0.7575								586.062	7.58964e-05	3.01935e-11	7.58965e-05		614.133	1.25338e-05	1.46226e-10	1.25339e-05
0.36716	0.80545	0.2832	0.7533								586.991	7.47254e-05	2.84688e-11	7.47254e-05		615.113	1.22761e-05	1.37866e-10	1.22762e-05
0.36925	0.80174	0.28475	0.74908								587.92	7.35703e-05	2.684e-11	7.35703e-05		616.093	1.20232e-05	1.2997e-10	1.20234e-05
0.37134	0.79801	0.28631	0.74486								588.848	7.24309e-05	2.53019e-11	7.24309e-05		617.073	1.17752e-05	1.22515e-10	1.17753e-05
0.37345	0.79427	0.28789	0.74063								589.777	7.1307e-05	2.38496e-11	7.1307e-05		618.053	1.15317e-05	1.15476e-10	1.15319e-05
0.37556	0.79051	0.28947	0.73639								590.705	7.01985e-05	2.24785e-11	7.01985e-05		619.033	1.12929e-05	1.0883e-10	1.1293e-05
0.37769	0.78673	0.29105	0.73214								591.634	6.91052e-05	2.11841e-11	6.91052e-05		620.013	1.10587e-05	1.02557e-10	1.10588e-05
0.37983	0.78294	0.29265	0.72788								592.563	6.80269e-05	1.99623e-11	6.80269e-05		620.993	1.08288e-05	9.66358e-11	1.08289e-05
0.38199	0.77913	0.29425	0.72361								593.491	6.69634e-05	1.88091e-11	6.69634e-05		621.973	1.06034e-05	9.10475e-11	1.06034e-05
0.38416	0.7753	0.29587	0.71934								594.42	6.59146e-05	1.77208e-11	6.59146e-05		622.953	1.03822e-05	8.57739e-11	1.03823e-05
0.38633	0.77146	0.2975	0.71506								595.349	6.48803e-05	1.66938e-11	6.48804e-05		623.933	1.01652e-05	8.07978e-11	1.01653e-05
0.38853	0.76761	0.29912	0.71078								596.277	6.38604e-05	1.57248e-11	6.38604e-05		624.913	9.95245e-06	7.61028e-11	9.95253e-06
0.39072	0.76374	0.30077	0.70649								597.206	6.28546e-05	1.48106e-11	6.28547e-05		625.893	9.74375e-06	7.16735e-11	9.74382e-06
0.39294	0.75986	0.30242	0.70219								598.134	6.18629e-05	1.39482e-11	6.18629e-05		626.873	9.53906e-06	6.74954e-11	9.53912e-06
0.39517	0.75596	0.30407	0.69789								599.063	6.0885e-05	1.31347e-11	6.0885e-05		627.853	9.33831e-06	6.35545e-11	9.33837e-06
0.39741	0.75205	0.30575	0.69358								599.992	5.99208e-05	1.23674e-11	5.99208e-05		628.833	9.14144e-06	5.98378e-11	9.1415e-06
0.39966	0.74813	0.30743	0.68927								600.92	5.89701e-05	1.16439e-11	5.89701e-05		629.813	8.94837e-06	5.63329e-11	8.94843e-06
0.40193	0.74419	0.30911	0.68496								601.849	5.80328e-05	1.09615e-11	5.80328e-05		630.793	8.75906e-06	5.30281e-11	8.75911e-06
0.40421	0.74025	0.31081	0.68064								602.778	5.71087e-05	1.03182e-11	5.71087e-05		631.773	8.57342e-06	4.99122e-11	8.57347e-06
0.4065	0.73629	0.31251	0.67632								603.706	5.61976e-05	9.71164e-12	5.61977e-05		632.753	8.39139e-06	4.69747e-11	8.39144e-06
0.40881	0.73232	0.31422	0.672								604.635	5.52995e-05	9.13985e-12	5.52995e-05		633.733	8.21292e-06	4.42058e-11	8.21296e-06
0.41112	0.72834	0.31595	0.66768								605.564	5.44141e-05	8.60089e-12	5.44141e-05		634.713	8.03794e-06	4.15959e-11	8.03798e-06
0.41346	0.72435	0.31769	0.66335								606.492	5.35413e-05	8.09292e-12	5.35413e-05		635.693	7.86638e-06	3.91363e-11	7.86642e-06
0.4158	0.72035	0.31943	0.65902								607.421	5.2681e-05	7.6142e-12	5.2681e-05		636.673	7.6982e-06	3.68185e-11	7.69824e-06
0.41816	0.71634	0.32118	0.65469								608.349	5.18329e-05	7.1631e-12	5.18329e-05		637.653	7.53332e-06	3.46345e-11	7.53336e-06
0.42052	0.71232	0.32295	0.65036								609.278	5.0997e-05	6.73806e-12	5.0997e-05		638.633	7.3717e-06	3.25769e-11	7.37173e-06
0.42291	0.70829	0.32471	0.64604								610.207	5.01731e-05	6.33762e-12	5.01731e-05		639.613	7.21327e-06	3.06385e-11	7.2133e-06
0.4253	0.70426	0.3265	0.64171								611.135	4.93611e-05	5.9604e-12	4.93611e-05		640.593	7.05797e-06	2.88125e-11	7.058e-06
0.42772	0.70022	0.32829	0.63738								612.064	4.85608e-05	5.60508e-12	4.85608e-05		641.573	6.90576e-06	2.70928e-11	6.90578e-06
0.43015	0.69617	0.33009	0.63305								612.993	4.7772e-05	5.27042e-12	4.7772e-05		642.553	6.75657e-06	2.54731e-11	6.75659e-06
0.43258	0.69211	0.3319	0.62872								613.921	4.69947e-05	4.95526e-12	4.69947e-05		643.533	6.61035e-06	2.39479e-11	6.61038e-06
0.43504	0.68804	0.33372	0.6244								614.85	4.62287e-05	4.6585e-12	4.62287e-05		644.513	6.46706e-06	2.25118e-11	6.46708e-06
0.4375	0.68397	0.33555	0.62008								615.778	4.54738e-05	4.37907e-12	4.54738e-05		645.493	6.32662e-06	2.11598e-11	6.32665e-06
0.43999	0.6799	0.3374	0.61576								616.707	4.47299e-05	4.116e-12	4.47299e-05		646.473	6.18901e-06	1.98869e-11	6.18903e-06
0.44248	0.67582	0.33924	0.61144								617.636	4.39969e-05	3.86836e-12	4.39969e-05		647.453	6.05415e-06	1.86888e-11	6.05417e-06
0.44499	0.67173	0.34111	0.60713								618.564	4.32746e-05	3.63526e-12	4.32746e-05		648.433	5.92201e-06	1.75612e-11	5.92203e-06
0.44751	0.66764	0.34298	0.60281								619.493	4.2563e-05	3.41588e-12	4.2563e-05		649.413	5.79254e-06	1.64999e-11	5.79255e-06
0.45005	0.66354	0.34486	0.59851								620.422	4.18618e-05	3.20941e-12	4.18618e-05		650.393	5.66568e-06	1.55013e-11	5.66569e-06
0.4526	0.65944	0.34675	0.59421								621.35	4.1171e-05	3.01514e-12	4.1171e-05		651.373	5.54139e-06	1.45617e-11	5.5414e-06
0.45517	0.65534	0.34866	0.58991								622.279	4.04903e-05	2.83234e-12	4.04903e-05		652.353	5.41962e-06	1.36776e-11	5.41963e-06
0.45775	0.65124	0.35057	0.58561								623.207	3.98198e-05	2.66037e-12	3.98198e-05		653.333	5.30032e-06	1.2846e-11	5.30033e-06
0.46034	0.64713	0.35249	0.58133								624.136	3.91592e-05	2.49859e-12	3.91592e-05		654.313	5.18345e-06	1.20638e-11	5.18347e-06
0.46296	0.64302	0.35443	0.57705								625.065	3.85085e-05	2.34643e-12	3.85085e-05		655.293	5.06897e-06	1.1328e-11	5.06898e-06
0.46558	0.6389	0.35637	0.57277								625.993	3.78674e-05	2.20331e-12	3.78674e-05		656.273	4.95683e-06	1.06361e-11	4.95684e-06
0.46822	0.63479	0.35833	0.5685								626.922	3.72359e-05	2.06872e-12	3.72359e-05		657.253	4.84699e-06	9.98547e-12	4.847e-06
0.47087	0.63067	0.3603	0.56424								627.851	3.66139e-05	1.94216e-12	3.66139e-05		658.233	4.7394e-06	9.37371e-12	4.73941e-06
0.47354	0.62656	0.36227	0.55998								628.779	3.60012e-05	1.82317e-12	3.60012e-05		659.213	4.63402e-06	8.79856e-12	4.63403e-06
0.47622	0.62244	0.36426	0.55573								629.708	3.53978e-05	1.7113e-12	3.53978e-05		660.193	4.53082e-06	8.25788e-12	4.53082e-06
0.47893	0.61832	0.36626	0.55149								630.636	3.48034e-05	1.60614e-12	3.48034e-05		661.173	4.42974e-06	7.74967e-12	4.42975e-06
0.48165	0.6142	0.36826	0.54726								631.565	3.4218e-05	1.50729e-12	3.4218e-05		662.153	4.33076e-06	7.27202e-12	4.33076e-06
0.48437	0.61009	0.37029	0.54303								632.494	3.36415e-05	1.41438e-12	3.36415e-05		663.133	4.23383e-06	6.82313e-12	4.23383e-06
0.48712	0.60597	0.37232	0.53882								633.422	3.30737e-05	1.32708e-12	3.30737e-05		664.113	4.13891e-06	6.40132e-12	4.13891e-06
0.48988	0.60186	0.37436	0.53461								634.351	3.25145e-05	1.24504e-12	3.25145e-05		665.093	4.04596e-06	6.005e-12	4.04597e-06
0.49266	0.59775	0.37642	0.53041								635.28	3.19639e-05	1.16796e-12	3.19639e-05		666.073	3.95495e-06	5.63265e-12	3.95496e-06
0.49545	0.59364	0.37848	0.52622								636.208	3.14216e-05	1.09554e-12	3.14216e-05		667.053	3.86585e-06	5.28288e-12	3.86585e-06
0.49826	0.58953	0.38056	0.52204								637.137	3.08877e-05	1.02751e-12	3.08877e-05		668.033	3.77861e-06	4.95433e-12	3.77861e-06
0.50108	0.58542	0.38265	0.51787								638.065	3.0362e-05	9.63616e-13	3.0362e-05		669.013	3.69319e-06	4.64576e-12	3.6932e-06
0.50393	0.58132	0.38474	0.51372								638.994	2.98443e-05	9.03604e-13	2.98443e-05		669.993	3.60958e-06	4.35598e-12	3.60958e-06
0.50678	0.57722	0.38686	0.50957								639.923	2.93346e-05	8.47247e-13	2.93346e-05		670.973	3.52772e-06	4.08388e-12	3.52772e-06
0.50966	0.57312	0.38898	0.50543								640.851	2.88327e-05	7.94327e-13	2.88327e-05		671.953	3.44759e-06	3.82839e-12	3.44759e-06
0.51255	0.56903	0.39111	0.50131								641.78	2.83386e-05	7.4464e-13	2.83386e-05		672.933	3.36915e-06	3.58853e-12	3.36915e-06
0.51545	0.56495	0.39326	0.49719								642.709	2.78522e-05	6.97992e-13	2.78522e-05		673.913	3.29237e-06	3.36337e-12	3.29237e-06
0.51838	0.56086	0.39542	0.49309								643.637	2.73733e-05	6.54203e-13	2.73733e-05		674.893	3.21722e-06	3.15203e-12	3.21722e-06
0.52131	0.55679	0.39759	0.489								644.566	2.69019e-05	6.13101e-13	2.69019e-05		675.873	3.14366e-06	2.95367e-12	3.14367e-06
0.52428	0.55271	0.39977	0.48492								645.494	2.64378e-05	5.74525e-13	2.64378e-05		676.853	3.07167e-06	2.76753e-12	3.07168e-06
0.52724	0.54865	0.40197	0.48085								646.423	2.59809e-05	5.38324e-13	2.59809e-05		677.833	3.00122e-06	2.59286e-12	3.00122e-06
0.53024	0.54459	0.40417	0.4768								647.352	2.55312e-05	5.04355e-13	2.55312e-05		678.813	2.93227e-06	2.42897e-12	2.93227e-06
0.53324	0.54053	0.40639	0.47276								648.28	2.50886e-05	4.72483e-13	2.50886e-05		679.793	2.8648e-06	2.27522e-12	2.8648e-06
0.53627	0.53648	0.40862	0.46873								649.209	2.46529e-05	4.42582e-13	2.46529e-05		680.773	2.79877e-06	2.13099e-12	2.79878e-06
0.5393	0.53244	0.41086	0.46472								650.138	2.42241e-05	4.14532e-13	2.42241e-05		681.753	2.73417e-06	1.99571e-12	2.73417e-06
0.54236	0.52841	0.41311	0.46072								651.066	2.3802e-05	3.88223e-13	2.3802e-05		682.733	2.67095e-06	1.86883e-12	2.67095e-06
0.54544	0.52438	0.41538	0.45674								651.995	2.33866e-05	3.63547e-13	2.33866e-05		683.713	2.6091e-06	1.74985e-12	2.6091e-06
0.54853	0.52037	0.41766	0.45277								652.924	2.29778e-05	3.40407e-13	2.29778e-05		684.693	2.54858e-06	1.63828e-12	2.54858e-06
0.55165	0.51636	0.41995	0.44881								653.852	2.25755e-05	3.18709e-13	2.25755e-05		685.673	2.48937e-06	1.53367e-12	2.48938e-06
0.55477	0.51235	0.42226	0.44487								654.781	2.21796e-05	2.98364e-13	2.21796e-05		686.653	2.43145e-06	1.4356e-12	2.43145e-06
0.55792	0.50836	0.42457	0.44094								655.709	2.179e-05	2.79291e-13	2.179e-05		687.633	2.37479e-06	1.34367e-12	2.37479e-06
0.56107	0.50438	0.4269	0.43703								656.638	2.14066e-05	2.61412e-13	2.14066e-05		688.613	2.31935e-06	1.2575e-12	2.31935e-06
0.56426	0.5004	0.42925	0.43313								657.567	2.10293e-05	2.44653e-13	2.10293e-05		689.593	2.26513e-06	1.17675e-12	2.26513e-06
0.56745	0.49644	0.4316	0.42925								658.495	2.06581e-05	2.28947e-13	2.06581e-05		690.573	2.21209e-06	1.10107e-12	2.21209e-06
0.57068	0.49248	0.43397	0.42539								659.424	2.02928e-05	2.14228e-13	2.02928e-05		691.553	2.16021e-06	1.03015e-12	2.16021e-06
0.57392	0.48854	0.43634	0.42154								660.353	1.99335e-05	2.00435e-13	1.99335e-05		692.533	2.10947e-06	9.63712e-13	2.10947e-06
0.57717	0.4846	0.43874	0.4177								661.281	1.95799e-05	1.87512e-13	1.95799e-05		693.513	2.05984e-06	9.01467e-13	2.05984e-06
0.58044	0.48068	0.44115	0.41389								662.21	1.9232e-05	1.75406e-13	1.9232e-05		694.493	2.01131e-06	8.43159e-13	2.01131e-06
0.58373	0.47676	0.44357	0.41009								663.138	1.88898e-05	1.64065e-13	1.88898e-05		695.473	1.96384e-06	7.88546e-13	1.96384e-06
0.58704	0.47286	0.44601	0.4063								664.067	1.85531e-05	1.53442e-13	1.85531e-05		696.453	1.91742e-06	7.37397e-13	1.91743e-06
0.59036	0.46897	0.44846	0.40254								664.996	1.82219e-05	1.43493e-13	1.82219e-05		697.433	1.87203e-06	6.89498e-13	1.87203e-06
0.59372	0.46509	0.45091	0.39879								665.924	1.7896e-05	1.34176e-13	1.7896e-05		698.413	1.82765e-06	6.44646e-13	1.82765e-06
0.59708	0.46122	0.45339	0.39506								666.853	1.75755e-05	1.25452e-13	1.75755e-05		699.393	1.78425e-06	6.02654e-13	1.78425e-06
0.60047	0.45736	0.45588	0.39134								667.782	1.72603e-05	1.17283e-13	1.72603e-05		700.373	1.74181e-06	5.63341e-13	1.74181e-06
0.60387	0.45352	0.45837	0.38765								668.71	1.69502e-05	1.09636e-13	1.69502e-05		701.353	1.70032e-06	5.26541e-13	1.70032e-06
0.6073	0.44969	0.46089	0.38397								669.639	1.66451e-05	1.02477e-13	1.66451e-05		702.333	1.65976e-06	4.92096e-13	1.65976e-06
0.61075	0.44587	0.46343	0.38031								670.567	1.63451e-05	9.57768e-14	1.63451e-05		703.313	1.6201e-06	4.59859e-13	1.6201e-06
0.6142	0.44206	0.46596	0.37666								671.496	1.60501e-05	8.95056e-14	1.60501e-05		704.293	1.58133e-06	4.29692e-13	1.58133e-06
0.61769	0.43827	0.46852	0.37304								672.425	1.57599e-05	8.36369e-14	1.57599e-05		705.273	1.54343e-06	4.01465e-13	1.54343e-06
0.62118	0.43449	0.4711	0.36943								673.353	1.54745e-05	7.81453e-14	1.54745e-05		706.253	1.50639e-06	3.75055e-13	1.50639e-06
0.62471	0.43073	0.47367	0.36584								674.282	1.51938e-05	7.30073e-14	1.51938e-05		707.233	1.47017e-06	3.50347e-13	1.47017e-06
0.62825	0.42698	0.47628	0.36227								675.211	1.49178e-05	6.82003e-14	1.49178e-05		708.213	1.43478e-06	3.27236e-13	1.43478e-06
0.63182	0.42324	0.47889	0.35872								676.139	1.46464e-05	6.37037e-14	1.46464e-05		709.193	1.40018e-06	3.05618e-13	1.40018e-06
0.63539	0.41951	0.48152	0.35519								677.068	1.43795e-05	5.94978e-14	1.43795e-05		710.173	1.36636e-06	2.85401e-13	1.36636e-06
0.639	0.41581	0.48416	0.35168								677.996	1.4117e-05	5.55641e-14	1.4117e-05		711.153	1.33332e-06	2.66495e-13	1.33332e-06
0.64261	0.41211	0.48682	0.34819								678.925	1.3859e-05	5.18854e-14	1.3859e-05		712.133	1.30102e-06	2.48817e-13	1.30102e-06
0.64626	0.40843	0.48949	0.34471								679.854	1.36052e-05	4.84456e-14	1.36052e-05		713.113	1.26946e-06	2.32289e-13	1.26946e-06
0.64994	0.40477	0.49218	0.34126								680.782	1.33557e-05	4.52294e-14	1.33557e-05		714.093	1.23861e-06	2.16837e-13	1.23861e-06
0.65361	0.40112	0.49487	0.33782								681.711	1.31105e-05	4.22226e-14	1.31105e-05		715.073	1.20847e-06	2.02394e-13	1.20847e-06
0.65732	0.39749	0.49759	0.33441								682.64	1.28693e-05	3.94118e-14	1.28693e-05		716.053	1.17902e-06	1.88893e-13	1.17902e-06
0.66104	0.39387	0.50032	0.33101								683.568	1.26322e-05	3.67846e-14	1.26322e-05		717.033	1.15025e-06	1.76277e-13	1.15025e-06
0.6648	0.39027	0.50306	0.32763								684.497	1.23991e-05	3.43291e-14	1.23991e-05		718.013	1.12213e-06	1.64486e-13	1.12213e-06
0.66856	0.38668	0.50582	0.32428								685.425	1.217e-05	3.20345e-14	1.217e-05		718.993	1.09466e-06	1.53469e-13	1.09466e-06
0.67236	0.38311	0.5086	0.32094								686.354	1.19448e-05	2.98903e-14	1.19448e-05		719.973	1.06782e-06	1.43176e-13	1.06782e-06
0.67616	0.37956	0.51139	0.31763								687.283	1.17234e-05	2.78869e-14	1.17234e-05		720.953	1.04161e-06	1.3356e-13	1.04161e-06
0.68	0.37602	0.5142	0.31433								688.211	1.15057e-05	2.60153e-14	1.15057e-05		721.933	1.01599e-06	1.24578e-13	1.01599e-06
0.68386	0.3725	0.51702	0.31106								689.14	1.12918e-05	2.42669e-14	1.12918e-05		722.913	9.90972e-07	1.16188e-13	9.90973e-07
0.68773	0.36899	0.51985	0.3078								690.069	1.10815e-05	2.26338e-14	1.10815e-05		723.893	9.66532e-07	1.08353e-13	9.66532e-07
0.69164	0.36551	0.52271	0.30457								690.997	1.08749e-05	2.11085e-14	1.08749e-05		724.873	9.4266e-07	1.01036e-13	9.4266e-07
0.69555	0.36204	0.52558	0.30135								691.926	1.06718e-05	1.96841e-14	1.06718e-05		725.853	9.19342e-07	9.42043e-14	9.19342e-07
0.6995	0.35858	0.52846	0.29816								692.855	1.04721e-05	1.83541e-14	1.04721e-05		726.833	8.96568e-07	8.78257e-14	8.96568e-07
0.70346	0.35515	0.53136	0.29499								693.783	1.02759e-05	1.71122e-14	1.02759e-05		727.813	8.74325e-07	8.18709e-14	8.74325e-07
0.70746	0.35173	0.53428	0.29183								694.712	1.00831e-05	1.59528e-14	1.00831e-05		728.793	8.52601e-07	7.63123e-14	8.52602e-07
0.71146	0.34833	0.5372	0.2887								695.64	9.89365e-06	1.48706e-14	9.89365e-06		729.773	8.31387e-07	7.11242e-14	8.31387e-07
0.7155	0.34495	0.54016	0.28559								696.569	9.70745e-06	1.38603e-14	9.70745e-06		730.753	8.1067e-07	6.62823e-14	8.1067e-07
0.71955	0.34158	0.54313	0.2825								697.498	9.52448e-06	1.29175e-14	9.52448e-06		731.733	7.90439e-07	6.17639e-14	7.90439e-07
0.72364	0.33823	0.5461	0.27943								698.426	9.34469e-06	1.20376e-14	9.34469e-06		732.713	7.70685e-07	5.75479e-14	7.70685e-07
0.72775	0.33491	0.5491	0.27639								699.355	9.16803e-06	1.12166e-14	9.16803e-06		733.693	7.51396e-07	5.36144e-14	7.51396e-07
0.73186	0.33159	0.55212	0.27336								700.284	8.99445e-06	1.04505e-14	8.99445e-06		734.673	7.32563e-07	4.99449e-14	7.32563e-07
0.73602	0.3283	0.55514	0.27035								701.212	8.8239e-06	9.73586e-15	8.8239e-06		735.653	7.14174e-07	4.6522e-14	7.14174e-07
0.74018	0.32503	0.55819	0.26737								702.141	8.65633e-06	9.06917e-15	8.65633e-06		736.633	6.96222e-07	4.33293e-14	6.96222e-07
0.74439	0.32177	0.56124	0.26441								703.069	8.4917e-06	8.44731e-15	8.4917e-06		737.613	6.78695e-07	4.03519e-14	6.78695e-07
0.7486	0.31854	0.56433	0.26146								703.998	8.32996e-06	7.86733e-15	8.32996e-06		738.593	6.61584e-07	3.75753e-14	6.61584e-07
0.75285	0.31532	0.56743	0.25854								704.927	8.17107e-06	7.32645e-15	8.17107e-06		739.573	6.44881e-07	3.49864e-14	6.44881e-07
0.75711	0.31212	0.57053	0.25564								705.855	8.01498e-06	6.82209e-15	8.01498e-06		740.553	6.28576e-07	3.25726e-14	6.28576e-07
0.76141	0.30894	0.57367	0.25277								706.784	7.86164e-06	6.35184e-15	7.86164e-06		741.533	6.1266e-07	3.03224e-14	6.12661e-07
0.76572	0.30578	0.57682	0.24991								707.713	7.71101e-06	5.91342e-15	7.71101e-06		742.513	5.97125e-07	2.82248e-14	5.97126e-07
0.77007	0.30263	0.57998	0.24707								708.641	7.56305e-06	5.50473e-15	7.56305e-06		743.493	5.81963e-07	2.62698e-14	5.81963e-07
0.77444	0.29951	0.58316	0.24426								709.57	7.41771e-06	5.12378e-15	7.41771e-06		744.473	5.67164e-07	2.44478e-14	5.67164e-07
0.77883	0.2964	0.58637	0.24146								710.498	7.27496e-06	4.76874e-15	7.27496e-06		745.453	5.5272e-07	2.275e-14	5.5272e-07
0.78325	0.29332	0.58958	0.23869								711.427	7.13475e-06	4.43786e-15	7.13475e-06		746.433	5.38624e-07	2.11679e-14	5.38625e-07
0.78768	0.29025	0.59282	0.23594								712.356	6.99704e-06	4.12954e-15	6.99704e-06		747.413	5.24869e-07	1.9694e-14	5.24869e-07
0.79215	0.28721	0.59607	0.23321								713.284	6.86179e-06	3.84227e-15	6.86179e-06		748.393	5.11445e-07	1.83209e-14	5.11445e-07
0.79664	0.28418	0.59934	0.2305								714.213	6.72896e-06	3.57463e-15	6.72896e-06		749.373	4.98346e-07	1.70418e-14	4.98346e-07
0.80116	0.28117	0.60263	0.22782								715.142	6.59851e-06	3.32531e-15	6.59851e-06		750.353	4.85564e-07	1.58505e-14	4.85564e-07
0.80569	0.27819	0.60594	0.22515								716.07	6.47041e-06	3.09308e-15	6.47041e-06		751.333	4.73093e-07	1.4741e-14	4.73093e-07
0.81027	0.27522	0.60926	0.2225								716.999	6.34461e-06	2.87679e-15	6.34461e-06		752.313	4.60924e-07	1.37079e-14	4.60924e-07
0.81487	0.27227	0.6126	0.21988								717.927	6.22107e-06	2.67536e-15	6.22107e-06		753.293	4.49052e-07	1.27459e-14	4.49052e-07
0.81948	0.26934	0.61597	0.21728								718.856	6.09977e-06	2.4878e-15	6.09977e-06		754.273	4.3747e-07	1.18502e-14	4.3747e-07
0.82414	0.26643	0.61934	0.2147								719.785	5.98066e-06	2.31316e-15	5.98066e-06		755.253	4.2617e-07	1.10164e-14	4.2617e-07
0.8288	0.26354	0.62274	0.21214								720.713	5.8637e-06	2.15057e-15	5.8637e-06		756.233	4.15146e-07	1.02403e-14	4.15146e-07
0.83351	0.26067	0.62617	0.2096								721.642	5.74887e-06	1.99921e-15	5.74887e-06		757.213	4.04393e-07	9.51791e-15	4.04393e-07
0.83822	0.25782	0.62959	0.20708								722.571	5.63612e-06	1.85832e-15	5.63612e-06		758.193	3.93903e-07	8.84562e-15	3.93903e-07
0.84299	0.255	0.63305	0.20459								723.499	5.52543e-06	1.7272e-15	5.52543e-06		759.173	3.83671e-07	8.22001e-15	3.83671e-07
0.84775	0.25219	0.63652	0.20211								724.428	5.41675e-06	1.60517e-15	5.41675e-06		760.153	3.73691e-07	7.63789e-15	3.73691e-07
0.85257	0.2494	0.64001	0.19966								725.356	5.31006e-06	1.49162e-15	5.31006e-06		761.133	3.63957e-07	7.0963e-15	3.63957e-07
0.85739	0.24663	0.64353	0.19722								726.285	5.20532e-06	1.38596e-15	5.20532e-06		762.113	3.54463e-07	6.59247e-15	3.54463e-07
0.86226	0.24388	0.64705	0.19481								727.214	5.1025e-06	1.28767e-15	5.1025e-06		763.093	3.45204e-07	6.12381e-15	3.45204e-07
0.86716	0.24115	0.65061	0.19242								728.142	5.00157e-06	1.19623e-15	5.00157e-06		764.073	3.36175e-07	5.68791e-15	3.36175e-07
0.87207	0.23844	0.65418	0.19005								729.071	4.90249e-06	1.11117e-15	4.90249e-06		765.053	3.27369e-07	5.28252e-15	3.27369e-07
0.87702	0.23575	0.65776	0.1877								730	4.80523e-06	1.03206e-15	4.80523e-06		766.033	3.18782e-07	4.90554e-15	3.18782e-07
0.88198	0.23308	0.66138	0.18537								730.928	4.70978e-06	9.58495e-16	4.70978e-06		767.013	3.10409e-07	4.55501e-15	3.10409e-07
0.88699	0.23043	0.66501	0.18306								731.857	4.61608e-06	8.90083e-16	4.61608e-06		767.993	3.02244e-07	4.22912e-15	3.02244e-07
0.89201	0.2278	0.66865	0.18077								732.785	4.52412e-06	8.26474e-16	4.52412e-06		768.973	2.94283e-07	3.92616e-15	2.94283e-07
0.89708	0.22519	0.67233	0.17851								733.714	4.43386e-06	7.67336e-16	4.43386e-06		769.953	2.86522e-07	3.64455e-15	2.86522e-07
0.90215	0.22261	0.67602	0.17626								734.643	4.34528e-06	7.1236e-16	4.34528e-06		770.933	2.78954e-07	3.3828e-15	2.78954e-07
0.90728	0.22004	0.67972	0.17403								735.571	4.25835e-06	6.61259e-16	4.25835e-06		771.913	2.71576e-07	3.13955e-15	2.71576e-07
0.91241	0.21749	0.68346	0.17183								736.5	4.17303e-06	6.13764e-16	4.17303e-06		772.894	2.64384e-07	2.9135e-15	2.64384e-07
0.91759	0.21496	0.68721	0.16964								737.429	4.08931e-06	5.69624e-16	4.08931e-06		773.874	2.57372e-07	2.70346e-15	2.57372e-07
0.92281	0.21245	0.69097	0.16748								738.357	4.00715e-06	5.28608e-16	4.00715e-06		774.854	2.50537e-07	2.50832e-15	2.50537e-07
0.92803	0.20996	0.69477	0.16533								739.286	3.92653e-06	4.90498e-16	3.92653e-06		775.833	2.43875e-07	2.32703e-15	2.43875e-07
0.9333	0.2075	0.69859	0.16321								740.215	3.84742e-06	4.5509e-16	3.84742e-06		776.813	2.37381e-07	2.15864e-15	2.37381e-07
0.93858	0.20505	0.70241	0.16111								741.143	3.7698e-06	4.22198e-16	3.7698e-06		777.793	2.31051e-07	2.00223e-15	2.31051e-07
0.94391	0.20262	0.70627	0.15902								742.072	3.69364e-06	3.91645e-16	3.69364e-06		778.774	2.24881e-07	1.85698e-15	2.24881e-07
0.94925	0.20021	0.71015	0.15696								743	3.61891e-06	3.63268e-16	3.61891e-06		779.754	2.18868e-07	1.72209e-15	2.18868e-07
0.95464	0.19782	0.71404	0.15491								743.929	3.54559e-06	3.36914e-16	3.54559e-06		780.734	2.13008e-07	1.59685e-15	2.13008e-07
0.96004	0.19545	0.71796	0.15289								744.858	3.47366e-06	3.12441e-16	3.47366e-06		781.714	2.07297e-07	1.48057e-15	2.07297e-07
0.96549	0.1931	0.7219	0.15088								745.786	3.40309e-06	2.89718e-16	3.40309e-06		782.694	2.01732e-07	1.37262e-15	2.01732e-07
0.97098	0.19078	0.72586	0.1489								746.715	3.33386e-06	2.68622e-16	3.33386e-06		783.674	1.96309e-07	1.27242e-15	1.96309e-07
0.97647	0.18847	0.72984	0.14693								747.644	3.26594e-06	2.49037e-16	3.26594e-06		784.654	1.91024e-07	1.17941e-15	1.91024e-07
0.98202	0.18618	0.73384	0.14498								748.572	3.19932e-06	2.30858e-16	3.19932e-06		785.634	1.85875e-07	1.0931e-15	1.85875e-07
0.98757	0.18391	0.73787	0.14306								749.501	3.13396e-06	2.13985e-16	3.13396e-06		786.614	1.80858e-07	1.01301e-15	1.80858e-07
0.99318	0.18166	0.74192	0.14115								750.429	3.06985e-06	1.98327e-16	3.06985e-06		787.594	1.7597e-07	9.3869e-16	1.7597e-07
0.99881	0.17943	0.74598	0.13926								751.358	3.00697e-06	1.83796e-16	3.00697e-06		788.574	1.71208e-07	8.69739e-16	1.71208e-07
1.00448	0.17722	0.75008	0.13739								752.287	2.94529e-06	1.70313e-16	2.94529e-06		789.554	1.66568e-07	8.05773e-16	1.66568e-07
1.01016	0.17503	0.75421	0.13554								753.215	2.88479e-06	1.57804e-16	2.88479e-06		790.534	1.62048e-07	7.46439e-16	1.62048e-07
1.0159	0.17285	0.75833	0.13371								754.144	2.82545e-06	1.46199e-16	2.82545e-06		791.514	1.57644e-07	6.91407e-16	1.57644e-07
1.02164	0.1707	0.7625	0.1319								755.073	2.76726e-06	1.35435e-16	2.76726e-06		792.494	1.53355e-07	6.40369e-16	1.53355e-07
1.02745	0.16857	0.76669	0.1301								756.001	2.71019e-06	1.25451e-16	2.71019e-06		793.474	1.49177e-07	5.9304e-16	1.49177e-07
1.03328	0.16645	0.77089	0.12833								756.93	2.65421e-06	1.16192e-16	2.65421e-06		794.454	1.45107e-07	5.49156e-16	1.45107e-07
1.03913	0.16436	0.77512	0.12657								757.858	2.59932e-06	1.07605e-16	2.59932e-06		795.434	1.41143e-07	5.08469e-16	1.41143e-07
1.04503	0.16229	0.77938	0.12483								758.787	2.54549e-06	9.96439e-17	2.54549e-06		796.414	1.37282e-07	4.70751e-16	1.37282e-07
1.05095	0.16023	0.78365	0.12311								759.716	2.49271e-06	9.22626e-17	2.49271e-06		797.394	1.33522e-07	4.35788e-16	1.33522e-07
1.05691	0.15819	0.78795	0.12141								760.644	2.44095e-06	8.54197e-17	2.44095e-06		798.374	1.2986e-07	4.03382e-16	1.2986e-07
1.06289	0.15618	0.79228	0.11973								761.573	2.39019e-06	7.90767e-17	2.39019e-06		799.354	1.26294e-07	3.73349e-16	1.26294e-07
1.06893	0.15418	0.79662	0.11806								762.502	2.34043e-06	7.31975e-17	2.34043e-06		800.334	1.22821e-07	3.45519e-16	1.22821e-07
1.07498	0.1522	0.801	0.11642								763.43	2.29163e-06	6.77489e-17	2.29163e-06		801.314	1.19439e-07	3.19731e-16	1.19439e-07
1.08109	0.15024	0.8054	0.11479								764.359	2.24379e-06	6.26998e-17	2.24379e-06		802.294	1.16146e-07	2.9584e-16	1.16146e-07
1.0872	0.14829	0.8098	0.11318								765.287	2.19688e-06	5.80213e-17	2.19688e-06		803.274	1.1294e-07	2.73707e-16	1.1294e-07
1.09338	0.14637	0.81425	0.11158								766.216	2.1509e-06	5.36867e-17	2.1509e-06		804.254	1.09818e-07	2.53205e-16	1.09818e-07
1.09959	0.14446	0.81873	0.11001								767.145	2.10581e-06	4.96712e-17	2.10581e-06		805.234	1.06778e-07	2.34215e-16	1.06778e-07
1.10581	0.14258	0.82321	0.10845								768.073	2.06161e-06	4.59515e-17	2.06161e-06		806.214	1.03819e-07	2.16629e-16	1.03819e-07
1.11209	0.14071	0.82773	0.10691								769.002	2.01829e-06	4.25062e-17	2.01829e-06		807.194	1.00938e-07	2.00343e-16	1.00938e-07
1.11838	0.13886	0.83226	0.10538								769.931	1.97581e-06	3.93154e-17	1.97581e-06		808.174	9.81332e-08	1.85264e-16	9.81332e-08
1.12473	0.13703	0.83684	0.10387								770.859	1.93418e-06	3.63606e-17	1.93418e-06		809.154	9.54028e-08	1.71303e-16	9.54028e-08
1.1311	0.13522	0.84143	0.10238								771.788	1.89336e-06	3.36247e-17	1.89336e-06		810.134	9.27449e-08	1.58378e-16	9.27449e-08
1.13752	0.13342	0.84604	0.10091								772.716	1.85336e-06	3.10915e-17	1.85336e-06		811.114	9.01578e-08	1.46415e-16	9.01578e-08
1.14396	0.13164	0.85069	0.09945								773.645	1.81415e-06	2.87465e-17	1.81415e-06		812.094	8.76395e-08	1.35341e-16	8.76395e-08
1.15046	0.12988	0.85536	0.09801								774.574	1.77572e-06	2.65757e-17	1.77572e-06		813.074	8.51884e-08	1.25093e-16	8.51884e-08
1.15699	0.12814	0.86004	0.09659								775.502	1.73805e-06	2.45664e-17	1.73805e-06		814.054	8.28028e-08	1.1561e-16	8.28028e-08
1.16354	0.12642	0.86477	0.09518								776.431	1.70113e-06	2.27069e-17	1.70113e-06		815.034	8.04811e-08	1.06835e-16	8.04811e-08
1.17015	0.12471	0.86952	0.09379								777.36	1.66495e-06	2.09861e-17	1.66495e-06		816.014	7.82215e-08	9.87166e-17	7.82215e-08
1.17677	0.12303	0.87428	0.09242								778.288	1.62949e-06	1.93938e-17	1.62949e-06		816.994	7.60225e-08	9.12061e-17	7.60225e-08
1.18345	0.12136	0.87908	0.09106								779.217	1.59475e-06	1.79206e-17	1.59475e-06		817.974	7.38826e-08	8.42587e-17	7.38826e-08
1.19015	0.1197	0.88391	0.08971								780.145	1.56069e-06	1.65577e-17	1.56069e-06		818.954	7.18003e-08	7.7833e-17	7.18003e-08
1.19691	0.11807	0.88875	0.08839								781.074	1.52733e-06	1.52969e-17	1.52733e-06		819.934	6.97741e-08	7.18902e-17	6.97741e-08
1.20368	0.11645	0.89363	0.08708								782.003	1.49463e-06	1.41308e-17	1.49463e-06		820.914	6.78026e-08	6.63947e-17	6.78026e-08
1.21051	0.11485	0.89855	0.08578								782.931	1.46259e-06	1.30523e-17	1.46259e-06		821.894	6.58843e-08	6.13133e-17	6.58843e-08
1.21736	0.11326	0.90346	0.0845								783.86	1.4312e-06	1.20549e-17	1.4312e-06		822.874	6.40179e-08	5.66152e-17	6.40179e-08
1.22428	0.11169	0.90843	0.08324								784.789	1.40044e-06	1.11327e-17	1.40044e-06		823.854	6.22021e-08	5.2272e-17	6.22021e-08
1.23123	0.11014	0.91342	0.08199								785.717	1.3703e-06	1.02801e-17	1.3703e-06		824.834	6.04355e-08	4.82573e-17	6.04355e-08
1.2382	0.10861	0.91842	0.08075								786.646	1.34077e-06	9.49178e-18	1.34077e-06		825.814	5.87169e-08	4.45465e-17	5.87169e-08
1.24523	0.10709	0.92346	0.07953								787.575	1.31185e-06	8.7631e-18	1.31185e-06		826.794	5.70451e-08	4.11171e-17	5.70451e-08
1.25228	0.10559	0.92854	0.07833								788.503	1.28351e-06	8.08957e-18	1.28351e-06		827.774	5.54189e-08	3.7948e-17	5.54189e-08
1.25939	0.10411	0.93362	0.07714								789.432	1.25574e-06	7.46709e-18	1.25574e-06		828.754	5.3837e-08	3.50197e-17	5.3837e-08
1.26651	0.10264	0.93875	0.07597								790.36	1.22854e-06	6.89183e-18	1.22854e-06		829.734	5.22983e-08	3.23142e-17	5.22983e-08
1.27371	0.10119	0.94389	0.0748								791.289	1.2019e-06	6.36028e-18	1.2019e-06		830.714	5.08017e-08	2.98148e-17	5.08017e-08
1.28091	0.09975	0.94907	0.07366								792.218	1.1758e-06	5.86915e-18	1.1758e-06		831.694	4.93461e-08	2.75061e-17	4.93461e-08
1.28819	0.09833	0.95429	0.07253								793.146	1.15023e-06	5.41542e-18	1.15023e-06		832.674	4.79305e-08	2.53736e-17	4.79305e-08
1.29548	0.09693	0.95951	0.07141								794.075	1.12519e-06	4.99629e-18	1.12519e-06		833.654	4.65537e-08	2.34042e-17	4.65537e-08
1.30284	0.09554	0.96478	0.07031								795.004	1.10067e-06	4.60914e-18	1.10067e-06		834.634	4.52148e-08	2.15855e-17	4.52148e-08
1.31024	0.09417	0.97009	0.06922								795.932	1.07664e-06	4.25158e-18	1.07664e-06		835.614	4.39128e-08	1.99062e-17	4.39128e-08
1.31765	0.09281	0.97539	0.06814								796.861	1.05311e-06	3.92138e-18	1.05311e-06		836.594	4.26467e-08	1.83558e-17	4.26467e-08
1.32513	0.09147	0.98075	0.06708								797.789	1.03007e-06	3.61648e-18	1.03007e-06		837.574	4.14155e-08	1.69244e-17	4.14155e-08
1.33263	0.09015	0.98614	0.06603								798.718	1.0075e-06	3.33496e-18	1.0075e-06		838.554	4.02184e-08	1.56032e-17	4.02184e-08
1.3402	0.08884	0.99154	0.065								799.647	9.85396e-07	3.07505e-18	9.85396e-07		839.534	3.90545e-08	1.43837e-17	3.90545e-08
1.34778	0.08754	0.99699	0.06398								800.575	9.63751e-07	2.83513e-18	9.63751e-07		840.514	3.79229e-08	1.32582e-17	3.79229e-08
1.35544	0.08626	1.00247	0.06297								801.504	9.42554e-07	2.61367e-18	9.42554e-07		841.494	3.68226e-08	1.22196e-17	3.68226e-08
1.36311	0.085	1.00795	0.06197								802.433	9.21798e-07	2.40928e-18	9.21798e-07		842.474	3.5753e-08	1.12612e-17	3.5753e-08
1.37085	0.08375	1.01349	0.06099								803.361	9.01473e-07	2.22065e-18	9.01473e-07		843.454	3.47132e-08	1.0377e-17	3.47132e-08
1.37864	0.08251	1.01906	0.06002								804.29	8.81571e-07	2.0466e-18	8.81571e-07		844.434	3.37023e-08	9.56127e-18	3.37023e-08
1.38644	0.08129	1.02464	0.05907								805.218	8.62083e-07	1.886e-18	8.62083e-07		845.414	3.27197e-08	8.80881e-18	3.27197e-08
1.39431	0.08009	1.03027	0.05812								806.147	8.43003e-07	1.73784e-18	8.43003e-07		846.394	3.17646e-08	8.11478e-18	3.17646e-08
1.4022	0.0789	1.03593	0.05719								807.076	8.24321e-07	1.60116e-18	8.24321e-07		847.374	3.08362e-08	7.47469e-18	3.08362e-08
1.41017	0.07772	1.0416	0.05627								808.004	8.06031e-07	1.47509e-18	8.06031e-07		848.354	2.99338e-08	6.88443e-18	2.99338e-08
1.41814	0.07655	1.04732	0.05536								808.933	7.88124e-07	1.35881e-18	7.88124e-07		849.334	2.90567e-08	6.34015e-18	2.90567e-08
1.4262	0.07541	1.05308	0.05447								809.862	7.70593e-07	1.25158e-18	7.70593e-07		850.314	2.82043e-08	5.83834e-18	2.82043e-08
1.43427	0.07427	1.05884	0.05359								810.79	7.5343e-07	1.1527e-18	7.5343e-07		851.294	2.73759e-08	5.37571e-18	2.73759e-08
1.44241	0.07315	1.06466	0.05272								811.719	7.36629e-07	1.06152e-18	7.36629e-07		852.274	2.65709e-08	4.94927e-18	2.65709e-08
1.45057	0.07204	1.07048	0.05186								812.647	7.20182e-07	9.77467e-19	7.20182e-07		853.254	2.57886e-08	4.5562e-18	2.57886e-08
1.45881	0.07095	1.07637	0.05101								813.576	7.04082e-07	8.9998e-19	7.04082e-07		854.234	2.50283e-08	4.19394e-18	2.50283e-08
1.4671	0.06987	1.08228	0.05018								814.505	6.88322e-07	8.28555e-19	6.88322e-07		855.214	2.42896e-08	3.86011e-18	2.42896e-08
1.4754	0.0688	1.0882	0.04935								815.433	6.72896e-07	7.62724e-19	6.72896e-07		856.194	2.35718e-08	3.5525e-18	2.35718e-08
1.48378	0.06775	1.09418	0.04854								816.362	6.57797e-07	7.02056e-19	6.57797e-07		857.174	2.28744e-08	3.26909e-18	2.28744e-08
1.49218	0.06671	1.1002	0.04774								817.291	6.43019e-07	6.46151e-19	6.43019e-07		858.154	2.21968e-08	3.00799e-18	2.21968e-08
1.50065	0.06568	1.10622	0.04695								818.219	6.28555e-07	5.9464e-19	6.28555e-07		859.134	2.15385e-08	2.76748e-18	2.15385e-08
1.50914	0.06467	1.1123	0.04617								819.148	6.14398e-07	5.47183e-19	6.14398e-07		860.114	2.08989e-08	2.54595e-18	2.08989e-08
1.51771	0.06367	1.11841	0.0454								820.076	6.00544e-07	5.03464e-19	6.00544e-07		861.094	2.02776e-08	2.34192e-18	2.02776e-08
1.5263	0.06268	1.12453	0.04465								821.005	5.86985e-07	4.63193e-19	5.86985e-07		862.074	1.9674e-08	2.15403e-18	1.9674e-08
1.53497	0.0617	1.13071	0.0439								821.934	5.73716e-07	4.26102e-19	5.73716e-07		863.054	1.90877e-08	1.98102e-18	1.90877e-08
1.54365	0.06074	1.13692	0.04316								822.862	5.60731e-07	3.91944e-19	5.60731e-07		864.034	1.85182e-08	1.82173e-18	1.85182e-08
1.55242	0.05979	1.14314	0.04244								823.791	5.48024e-07	3.60488e-19	5.48024e-07		865.014	1.7965e-08	1.67509e-18	1.7965e-08
1.56124	0.05885	1.14942	0.04172								824.72	5.3559e-07	3.31525e-19	5.3559e-07		865.994	1.74276e-08	1.5401e-18	1.74276e-08
1.57007	0.05792	1.15574	0.04102								825.648	5.23424e-07	3.0486e-19	5.23424e-07		866.974	1.69058e-08	1.41585e-18	1.69058e-08
1.57899	0.05701	1.16206	0.04032								826.577	5.11519e-07	2.80312e-19	5.11519e-07		867.954	1.63989e-08	1.30149e-18	1.63989e-08
1.58793	0.0561	1.16845	0.03964								827.505	4.99871e-07	2.57716e-19	4.99871e-07		868.934	1.59067e-08	1.19626e-18	1.59067e-08
1.59695	0.05521	1.17487	0.03896								828.434	4.88474e-07	2.36918e-19	4.88474e-07		869.914	1.54286e-08	1.09942e-18	1.54286e-08
1.60598	0.05434	1.1813	0.0383								829.363	4.77323e-07	2.17778e-19	4.77323e-07		870.894	1.49644e-08	1.01033e-18	1.49644e-08
1.6151	0.05347	1.18779	0.03764								830.291	4.66414e-07	2.00164e-19	4.66414e-07		871.874	1.45136e-08	9.28367e-19	1.45136e-08
1.62424	0.05261	1.19432	0.03699								831.22	4.55741e-07	1.83957e-19	4.55741e-07		872.854	1.40759e-08	8.52969e-19	1.40759e-08
1.63347	0.05177	1.20085	0.03636								832.149	4.453e-07	1.69047e-19	4.453e-07		873.834	1.36508e-08	7.83617e-19	1.36508e-08
1.64274	0.05094	1.20745	0.03573								833.077	4.35085e-07	1.55329e-19	4.35085e-07		874.814	1.32381e-08	7.19835e-19	1.32381e-08
1.65204	0.05011	1.21409	0.03511								834.006	4.25093e-07	1.42711e-19	4.25093e-07		875.794	1.28375e-08	6.61179e-19	1.28375e-08
1.66142	0.0493	1.22073	0.0345								834.935	4.15319e-07	1.31105e-19	4.15319e-07		876.774	1.24484e-08	6.07243e-19	1.24484e-08
1.67082	0.0485	1.22744	0.0339								835.863	4.05758e-07	1.20432e-19	4.05758e-07		877.754	1.20708e-08	5.57653e-19	1.20708e-08
1.68031	0.04771	1.23416	0.03331								836.792	3.96405e-07	1.10616e-19	3.96405e-07		878.734	1.17041e-08	5.12062e-19	1.17041e-08
1.68982	0.04694	1.24094	0.03273								837.72	3.87257e-07	1.01591e-19	3.87257e-07		879.714	1.13482e-08	4.70153e-19	1.13482e-08
1.69942	0.04617	1.24776	0.03216								838.649	3.7831e-07	9.32933e-20	3.7831e-07		880.694	1.10027e-08	4.31632e-19	1.10027e-08
1.70903	0.04541	1.25458	0.03159								839.578	3.69559e-07	8.56649e-20	3.69559e-07		881.674	1.06673e-08	3.96228e-19	1.06673e-08
1.71874	0.04467	1.26148	0.03104								840.506	3.61e-07	7.86526e-20	3.61e-07		882.654	1.03417e-08	3.63693e-19	1.03417e-08
1.72846	0.04393	1.26841	0.03049								841.435	3.52629e-07	7.22074e-20	3.52629e-07		883.634	1.00257e-08	3.33796e-19	1.00257e-08
1.73828	0.0432	1.27535	0.02995								842.364	3.44443e-07	6.62839e-20	3.44443e-07		884.614	9.71906e-09	3.06327e-19	9.71906e-09
1.74816	0.04249	1.28236	0.02942								843.292	3.36437e-07	6.08404e-20	3.36437e-07		885.594	9.42141e-09	2.81092e-19	9.42141e-09
1.75805	0.04178	1.28941	0.02889								844.221	3.28608e-07	5.58385e-20	3.28608e-07		886.574	9.13254e-09	2.5791e-19	9.13254e-09
1.76803	0.04109	1.29646	0.02838								845.149	3.20952e-07	5.12429e-20	3.20952e-07		887.554	8.8522e-09	2.36616e-19	8.8522e-09
1.77803	0.0404	1.30359	0.02787								846.078	3.13465e-07	4.7021e-20	3.13465e-07		888.534	8.58015e-09	2.1706e-19	8.58015e-09
1.78813	0.03973	1.31075	0.02737								847.007	3.06145e-07	4.31427e-20	3.06145e-07		889.514	8.31615e-09	1.991e-19	8.31615e-09
1.79825	0.03906	1.31792	0.02688								847.935	2.98987e-07	3.95805e-20	2.98987e-07		890.494	8.05997e-09	1.82609e-19	8.05997e-09
1.80846	0.0384	1.32517	0.0264								848.864	2.91988e-07	3.63089e-20	2.91988e-07		891.474	7.81141e-09	1.67467e-19	7.81141e-09
1.8187	0.03775	1.33245	0.02592								849.793	2.85145e-07	3.33045e-20	2.85145e-07		892.454	7.57022e-09	1.53566e-19	7.57022e-09
1.82903	0.03712	1.33974	0.02545								850.721	2.78454e-07	3.05457e-20	2.78454e-07		893.434	7.33622e-09	1.40805e-19	7.33622e-09
1.83937	0.03649	1.3471	0.02499								851.65	2.71913e-07	2.80128e-20	2.71913e-07		894.414	7.10918e-09	1.29092e-19	7.10918e-09
1.84982	0.03587	1.3545	0.02454								852.578	2.65517e-07	2.56874e-20	2.65517e-07		895.394	6.88892e-09	1.18341e-19	6.88892e-09
1.86033	0.03526	1.36191	0.02409								853.507	2.59265e-07	2.35527e-20	2.59265e-07		896.374	6.67523e-09	1.08476e-19	6.67523e-09
1.87085	0.03465	1.3694	0.02365								854.436	2.53153e-07	2.15934e-20	2.53153e-07		897.354	6.46794e-09	9.94226e-20	6.46794e-09
1.88148	0.03406	1.37692	0.02322								855.364	2.47178e-07	1.97951e-20	2.47178e-07		898.334	6.26685e-09	9.11163e-20	6.26685e-09
1.89213	0.03347	1.38446	0.02279								856.293	2.41337e-07	1.81449e-20	2.41337e-07		899.314	6.07179e-09	8.34958e-20	6.07179e-09
1.90287	0.0329	1.39207	0.02237								857.222	2.35628e-07	1.66306e-20	2.35628e-07		900.294	5.88258e-09	7.65051e-20	5.88258e-09
1.91364	0.03233	1.39968	0.02196								858.15	2.30047e-07	1.52412e-20	2.30047e-07		901.274	5.69906e-09	7.00929e-20	5.69906e-09
1.92451	0.03177	1.40738	0.02155								859.079	2.24592e-07	1.39665e-20	2.24592e-07		902.254	5.52106e-09	6.42119e-20	5.52106e-09
1.9354	0.03122	1.41511	0.02115								860.007	2.1926e-07	1.27972e-20	2.1926e-07		903.234	5.34843e-09	5.88186e-20	5.34843e-09
1.94639	0.03068	1.42285	0.02076								860.936	2.14048e-07	1.17247e-20	2.14048e-07		904.214	5.181e-09	5.3873e-20	5.181e-09
1.95745	0.03014	1.43067	0.02037								861.865	2.08955e-07	1.0741e-20	2.08955e-07		905.194	5.01863e-09	4.93384e-20	5.01863e-09
1.96852	0.02962	1.43853	0.01999								862.793	2.03977e-07	9.83886e-21	2.03977e-07		906.174	4.86117e-09	4.51811e-20	4.86117e-09
1.9797	0.0291	1.44641	0.01962								863.722	1.99112e-07	9.01164e-21	1.99112e-07		907.154	4.70847e-09	4.13701e-20	4.70847e-09
1.9909	0.02859	1.45435	0.01925								864.651	1.94357e-07	8.25317e-21	1.94357e-07		908.134	4.5604e-09	3.78768e-20	4.5604e-09
2.00221	0.02808	1.46235	0.01889								865.579	1.89711e-07	7.55781e-21	1.89711e-07		909.114	4.41683e-09	3.46751e-20	4.41683e-09
2.01354	0.02759	1.47035	0.01854								866.508	1.8517e-07	6.92036e-21	1.8517e-07		910.094	4.27762e-09	3.1741e-20	4.27762e-09
2.02498	0.0271	1.47843	0.01819								867.436	1.80733e-07	6.33607e-21	1.80733e-07		911.074	4.14264e-09	2.90523e-20	4.14264e-09
2.03643	0.02662	1.48655	0.01784								868.365	1.76398e-07	5.80054e-21	1.76398e-07		912.054	4.01178e-09	2.65887e-20	4.01178e-09
2.048	0.02615	1.49469	0.0175								869.294	1.72161e-07	5.30977e-21	1.72161e-07		913.034	3.8849e-09	2.43317e-20	3.8849e-09
2.05959	0.02568	1.5029	0.01717								870.222	1.68022e-07	4.86005e-21	1.68022e-07		914.014	3.7619e-09	2.22641e-20	3.7619e-09
2.07129	0.02522	1.51116	0.01684								871.151	1.63977e-07	4.44799e-21	1.63977e-07		914.994	3.64267e-09	2.03702e-20	3.64267e-09
2.08305	0.02477	1.51943	0.01652								872.08	1.60025e-07	4.07047e-21	1.60025e-07		915.974	3.52708e-09	1.86356e-20	3.52708e-09
2.09484	0.02433	1.52778	0.01621								873.008	1.56164e-07	3.72463e-21	1.56164e-07		916.954	3.41503e-09	1.70471e-20	3.41503e-09
2.10674	0.02389	1.53617	0.01589								873.937	1.52392e-07	3.40784e-21	1.52392e-07		917.934	3.30642e-09	1.55924e-20	3.30642e-09
2.11865	0.02346	1.54458	0.01559								874.865	1.48707e-07	3.1177e-21	1.48707e-07		918.914	3.20114e-09	1.42605e-20	3.20114e-09
2.13069	0.02304	1.55307	0.01529								875.794	1.45107e-07	2.85199e-21	1.45107e-07		919.894	3.09911e-09	1.3041e-20	3.09911e-09
2.14274	0.02262	1.5616	0.01499								876.723	1.4159e-07	2.60866e-21	1.4159e-07		920.874	3.00021e-09	1.19247e-20	3.00021e-09
2.15491	0.02221	1.57015	0.0147								877.651	1.38154e-07	2.38587e-21	1.38154e-07		921.854	2.90437e-09	1.09029e-20	2.90437e-09
2.16711	0.0218	1.57877	0.01442								878.58	1.34798e-07	2.18189e-21	1.34798e-07		922.834	2.81148e-09	9.96767e-21	2.81148e-09
2.17942	0.02141	1.58741	0.01414								879.509	1.3152e-07	1.99516e-21	1.3152e-07		923.814	2.72147e-09	9.11177e-21	2.72147e-09
2.19174	0.02101	1.59614	0.01386								880.437	1.28318e-07	1.82423e-21	1.28318e-07		924.794	2.63424e-09	8.32855e-21	2.63424e-09
2.20419	0.02063	1.60491	0.01359								881.366	1.2519e-07	1.66779e-21	1.2519e-07		925.774	2.54971e-09	7.61191e-21	2.54971e-09
2.21672	0.02025	1.61369	0.01332								882.295	1.22135e-07	1.52461e-21	1.22135e-07		926.754	2.4678e-09	6.95626e-21	2.4678e-09
2.22926	0.01988	1.62256	0.01306								883.223	1.19151e-07	1.39359e-21	1.19151e-07		927.734	2.38844e-09	6.35646e-21	2.38844e-09
2.24192	0.01951	1.63147	0.01281								884.152	1.16237e-07	1.27371e-21	1.16237e-07		928.714	2.31154e-09	5.80781e-21	2.31154e-09
2.2546	0.01915	1.6404	0.01255								885.08	1.13391e-07	1.16403e-21	1.13391e-07		929.694	2.23704e-09	5.306e-21	2.23704e-09
2.26741	0.01879	1.64942	0.01231								886.009	1.10611e-07	1.06369e-21	1.10611e-07		930.674	2.16486e-09	4.84708e-21	2.16486e-09
2.28024	0.01844	1.65848	0.01206								886.938	1.07897e-07	9.71903e-22	1.07897e-07		931.654	2.09493e-09	4.42742e-21	2.09493e-09
2.29319	0.0181	1.66755	0.01182								887.866	1.05246e-07	8.87952e-22	1.05246e-07		932.634	2.02718e-09	4.04369e-21	2.02718e-09
2.30616	0.01776	1.67672	0.01159								888.795	1.02658e-07	8.11174e-22	1.02658e-07		933.614	1.96156e-09	3.69287e-21	1.96156e-09
2.31926	0.01743	1.68593	0.01136								889.724	1.0013e-07	7.40963e-22	1.0013e-07		934.594	1.89798e-09	3.37215e-21	1.89798e-09
2.33244	0.0171	1.69516	0.01113								890.652	9.76616e-08	6.76764e-22	9.76616e-08		935.574	1.83641e-09	3.07898e-21	1.83641e-09
2.34563	0.01678	1.70447	0.01091								891.581	9.52515e-08	6.18067e-22	9.52515e-08		936.554	1.77676e-09	2.81103e-21	1.77676e-09
2.35896	0.01647	1.71384	0.01069								892.509	9.28983e-08	5.64407e-22	9.28983e-08		937.534	1.71899e-09	2.56615e-21	1.71899e-09
2.3723	0.01616	1.72322	0.01047								893.438	9.06007e-08	5.15355e-22	9.06007e-08		938.514	1.66303e-09	2.34237e-21	1.66303e-09
2.38578	0.01585	1.73269	0.01026								894.367	8.83573e-08	4.70521e-22	8.83573e-08		939.494	1.60884e-09	2.1379e-21	1.60884e-09
2.39927	0.01555	1.74221	0.01006								895.295	8.61671e-08	4.29546e-22	8.61671e-08		940.474	1.55636e-09	1.95109e-21	1.55636e-09
2.4129	0.01525	1.75174	0.00985								896.224	8.40289e-08	3.92101e-22	8.40289e-08		941.454	1.50553e-09	1.78042e-21	1.50553e-09
2.42655	0.01496	1.76137	0.00965								897.153	8.19413e-08	3.57886e-22	8.19413e-08		942.434	1.45631e-09	1.62453e-21	1.45631e-09
2.44034	0.01468	1.77105	0.00946								898.081	7.99034e-08	3.26625e-22	7.99034e-08		943.414	1.40864e-09	1.48214e-21	1.40864e-09
2.45414	0.0144	1.78074	0.00926								899.01	7.7914e-08	2.98066e-22	7.7914e-08		944.394	1.36249e-09	1.3521e-21	1.36249e-09
2.46808	0.01412	1.79052	0.00907								899.938	7.59719e-08	2.71977e-22	7.59719e-08		945.374	1.3178e-09	1.23335e-21	1.3178e-09
2.4821	0.01385	1.80032	0.00889								900.867	7.40762e-08	2.48148e-22	7.40762e-08		946.354	1.27453e-09	1.12492e-21	1.27453e-09
2.49615	0.01358	1.81021	0.00871								901.796	7.22258e-08	2.26385e-22	7.22258e-08		947.334	1.23264e-09	1.02592e-21	1.23264e-09
2.51033	0.01332	1.82016	0.00853								902.724	7.04196e-08	2.06511e-22	7.04196e-08		948.314	1.19207e-09	9.35544e-22	1.19207e-09
2.52453	0.01306	1.83012	0.00835								903.653	6.86566e-08	1.88363e-22	6.86566e-08		949.294	1.1528e-09	8.53046e-22	1.1528e-09
2.53887	0.01281	1.84018	0.00818								904.582	6.69358e-08	1.71793e-22	6.69358e-08		950.274	1.11479e-09	7.77746e-22	1.11479e-09
2.55323	0.01256	1.85029	0.00801								905.51	6.52564e-08	1.56666e-22	6.52564e-08		951.254	1.07799e-09	7.09024e-22	1.07799e-09
2.56773	0.01231	1.86042	0.00784								906.439	6.36173e-08	1.42857e-22	6.36173e-08		952.234	1.04236e-09	6.46312e-22	1.04236e-09
2.58226	0.01207	1.87064	0.00768								907.367	6.20176e-08	1.30252e-22	6.20176e-08		953.214	1.00787e-09	5.89089e-22	1.00787e-09
2.59693	0.01184	1.88092	0.00752								908.296	6.04565e-08	1.18748e-22	6.04565e-08		954.194	9.74494e-10	5.3688e-22	9.74494e-10
2.61162	0.01161	1.89121	0.00737								909.225	5.8933e-08	1.0825e-22	5.8933e-08		955.174	9.42184e-10	4.8925e-22	9.42184e-10
2.62646	0.01138	1.9016	0.00721								910.153	5.74462e-08	9.86705e-23	5.74462e-08		956.154	9.10913e-10	4.45803e-22	9.10913e-10
2.64137	0.01115	1.91205	0.00706								911.082	5.59954e-08	8.99298e-23	5.59954e-08		957.134	8.80647e-10	4.06174e-22	8.80647e-10
2.65632	0.01093	1.92252	0.00691								912.011	5.45797e-08	8.19556e-23	5.45797e-08		958.114	8.51355e-10	3.70032e-22	8.51355e-10
2.67141	0.01072	1.93308	0.00677								912.939	5.31983e-08	7.46812e-23	5.31983e-08		959.094	8.23007e-10	3.37073e-22	8.23007e-10
2.68652	0.0105	1.9437	0.00662								913.868	5.18504e-08	6.80459e-23	5.18504e-08		960.074	7.95575e-10	3.0702e-22	7.95575e-10
2.70178	0.0103	1.95434	0.00648								914.796	5.05352e-08	6.19941e-23	5.05352e-08		961.054	7.69028e-10	2.79619e-22	7.69028e-10
2.71706	0.01009	1.96508	0.00635								915.725	4.9252e-08	5.64752e-23	4.9252e-08		962.034	7.4334e-10	2.54638e-22	7.4334e-10
2.7325	0.00989	1.97588	0.00621								916.654	4.8e-08	5.14425e-23	4.8e-08		963.014	7.18483e-10	2.31867e-22	7.18483e-10
2.74796	0.00969	1.98669	0.00608								917.582	4.67786e-08	4.68538e-23	4.67786e-08		963.994	6.94432e-10	2.11112e-22	6.94432e-10
2.76357	0.0095	1.99761	0.00595								918.511	4.55869e-08	4.26703e-23	4.55869e-08		964.974	6.71162e-10	1.92195e-22	6.71162e-10
2.77927	0.00931	2.00858	0.00582								919.44	4.44243e-08	3.88566e-23	4.44243e-08		965.954	6.48647e-10	1.74957e-22	6.48647e-10
2.79499	0.00912	2.01958	0.0057								920.368	4.32902e-08	3.53803e-23	4.32902e-08		966.934	6.26865e-10	1.59249e-22	6.26865e-10
2.81087	0.00894	2.03067	0.00558								921.297	4.21838e-08	3.22119e-23	4.21838e-08		967.914	6.05792e-10	1.44938e-22	6.05792e-10
2.82677	0.00875	2.04183	0.00546								922.226	4.11046e-08	2.93244e-23	4.11046e-08		968.894	5.85406e-10	1.31899e-22	5.85406e-10
2.84282	0.00858	2.053	0.00534								923.154	4.00518e-08	2.66932e-23	4.00518e-08		969.874	5.65686e-10	1.20022e-22	5.65686e-10
2.85891	0.0084	2.06429	0.00523								924.083	3.90249e-08	2.42957e-23	3.90249e-08		970.854	5.46609e-10	1.09204e-22	5.46609e-10
2.87515	0.00823	2.07558	0.00511								925.011	3.80233e-08	2.21114e-23	3.80233e-08		971.834	5.28157e-10	9.93511e-23	5.28157e-10
2.89141	0.00807	2.08699	0.005								925.94	3.70463e-08	2.01216e-23	3.70463e-08		972.814	5.10308e-10	9.03785e-23	5.10308e-10
2.90784	0.0079	2.09846	0.00489								926.869	3.60934e-08	1.8309e-23	3.60934e-08		973.794	4.93045e-10	8.22081e-23	4.93045e-10
2.92429	0.00774	2.10994	0.00479								927.797	3.51641e-08	1.66581e-23	3.51641e-08		974.774	4.76349e-10	7.47691e-23	4.76349e-10
2.9409	0.00758	2.12153	0.00468								928.726	3.42577e-08	1.51546e-23	3.42577e-08		975.754	4.602e-10	6.79967e-23	4.602e-10
2.9576	0.00742	2.13319	0.00458													976.734	4.44583e-10	6.18316e-23	4.44583e-10
2.97434	0.00727	2.14487	0.00448													977.714	4.29481e-10	5.622e-23	4.29481e-10
2.99123	0.00712	2.15665	0.00438													978.694	4.14876e-10	5.11128e-23	4.14876e-10
3.00815	0.00697	2.1685	0.00429													979.674	4.00753e-10	4.64649e-23	4.00753e-10
