# Supplementary material for: Real-time monitoring of peptidoglycan synthesis by membrane-reconstituted penicillin-binding proteins
Source: eLife. 2021 Feb 24;10:e61525. doi: 10.7554/eLife.61525 (PMC7943195; doi:10.7554/eLife.61525)
Supplement: Figure 5—source data 1. [file elife-61525-fig5-data1.xlsx]

## Sheet: Fig5 
Fig. 4B						Fig. 4C				Fig. 4D							Fig. 4E					Fig. 4F					Fig. 4 - figure supplement 1
FRET kinetics						FRET eff				FRAP Docef							Large scale cross-linking					Diffusion of PG product in comparison to phospholipid probe
PBP1B-Amp/LpoB/lipid II		PBP1B/LpoB/lipid II				PBP1B/LpoB/lipid II	addition of cellosyl	PBP1b E233Q/LpoB/lipid II									Immobile fraction, FRARanalyser MATLAB					FRAP Dcoef (um2/s)					FRET intensity profile
time, min	FRETeff	time, s	FRET eff			0.25	0.066	0.054		PBP1B/LpoB/lipid II			PBP1B-Amp/LpoB/lipid II									PBP1B/LpoB/lipid II		PBP1B-Amp/lipid II			PBP1B/LpoB/Lipid II					PBP1B-Amp/LpoB/Lipid II
0	0	0	0			0.21	0.1	0.072		time, min	Dcoef lipid II Atto 647N, um2/s	Immobile fractoion, %	time, min	Dcoef lipid II Atto 647N, um2/s	Immobile fractoion,%			PBP1B/LpoB/lipid II	PBP1B-Amp/LpoB/lipid II			Dcoef lipid II Atto 647N	Dcoef lipid membrane probe	Dcoef lipid II Atto 647N	Dcoef lipid membrane probe		Lipid II Atto 550		Lipid II Atto 550			Lipid II Atto 550		Lipid II Atto 550
2	-0.00324	2	0.03379			0.35	0.11	0.074		1	2.42	12.8	1	2.86	13			13.5	13			0.685	2.5	3.16	1.33		distance, um	Intensity (a.u.)	distance, um	Intensity (a.u.)		distance, um	Intensity (a.u.)	distance, um	Intensity (a.u.)
3	-0.00197	3	0.02579			0.32	0.2	0.11		4	1.65	10.3	4	3.16	12.7			28.9	12.7			0.75	0.78	2.68	1.84		0	727.5	0	6886.92		0	1471	0	5458.33
4	0.00386	4	0.03499			0.42	0.15	0.12		8	1.025	15.7	8	2.68	11.8			14.5	11.8			0.55	1.83	2.43	1.66		0.107	719.583	0.107	6924.67		0.107	1461.67	0.107	5407.92
5	-0.00424	5	-0.00269							12	0.76	18.7	12	2.43	15.8			18.1	15.8			0.59	1.73	3.25	1.91		0.214	705.25	0.214	6936.33		0.214	1449.58	0.214	5291.83
6	0.00316	6	-0.00822		mean	0.31	0.1252	0.086		17	0.75	16.6	17	3.25	12.4			15.8	12.4								0.321	706.167	0.321	6964		0.321	1428.92	0.321	5237.83
7	-0.00631	7	0.07823		SD	0.0827647	0.0514315	0.0278209		20	0.82	17.5	20	3.02	11.9						mean	0.64375	1.71	2.88	1.685		0.428	712.25	0.428	7053.33		0.428	1456.83	0.428	5189.92
9	0.00553	9	0.08906							24	0.83	20	24	2.38	9.2		mean	18.16	13.14		SD	0.0906803	0.708002	0.39064	0.259037		0.535	719.583	0.535	7213.67		0.535	1450.08	0.535	5167.75
10	-0.01682	10	0.13973			p- value	0.00431489	0.00151872									SD	6.24564	1.55177								0.642	736.5	0.642	7280.67		0.642	1426.83	0.642	5287.67
11	-0.0101	11	0.11449																			p- value	0.00142761		0.960169		0.749	720.167	0.749	7167.33		0.749	1427.17	0.749	5320.92
12	-0.00508	12	0.09549															p- value	0.151393								0.856	733.583	0.856	7098.75		0.856	1462	0.856	5330.5
13	-0.01005	13	0.14857																								0.963	746.083	0.963	7078.25		0.963	1457.33	0.963	5287.58
14	0.00137	14	0.18971																								1.07	738.333	1.07	6970.17		1.07	1433.08	1.07	5270.08
15	0.00275	15	0.15676																								1.177	731.5	1.177	6944.92		1.177	1459.25	1.177	5312.5
16	0.00428	16	0.18671																								1.284	748.833	1.284	6874.75		1.284	1470.83	1.284	5250.5
17	-0.00559	17	0.16041																								1.391	735.833	1.391	6866.42		1.391	1469.5	1.391	5161.92
18	0.00486	18	0.16331																								1.498	776.917	1.498	6901.67		1.498	1440.75	1.498	5220.08
19	-0.00998	19	0.18215																								1.605	750.083	1.605	6968.17		1.605	1429.75	1.605	5214.42
20	-0.00873	20	0.19762																								1.712	742.583	1.712	7016.58		1.712	1437.17	1.712	5189.92
21	-0.00574	21	0.19051																								1.819	742.917	1.819	7031.5		1.819	1455.42	1.819	5244.83
22	-0.000839449	22	0.14683																								1.926	724.917	1.926	7056.58		1.926	1467.33	1.926	5154.58
23	-0.00371	23	0.14968																								2.033	732.167	2.033	7022.25		2.033	1474.92	2.033	5139.33
24	0.000275872	24	0.14724																								2.14	732.167	2.14	6853.25		2.14	1494.67	2.14	5094.92
25	-0.000217865	25	0.12071																								2.247	751.583	2.247	6699.33		2.247	1485.33	2.247	5246.08
25	0.0047	25	0.13841																								2.354	734.917	2.354	6536.08		2.354	1473	2.354	5314.17
26	-0.0074	26	0.18771																								2.461	733.917	2.461	6520.33		2.461	1453.17	2.461	5316.83
																											2.568	719.417	2.568	6557.33		2.568	1454.42	2.568	5310.08
																											2.675	750.25	2.675	6487		2.675	1440.25	2.675	5337.08
																											2.782	725.333	2.782	6554.42		2.782	1413.75	2.782	5355.42
																											2.889	725.917	2.889	6541.75		2.889	1436.25	2.889	5348.25
																											2.996	712.5	2.996	6734.17		2.996	1454.5	2.996	5493.92
																											3.103	681.583	3.103	6938.75		3.103	1488.25	3.103	5592.83
																											3.21	694.667	3.21	7038.33		3.21	1478.75	3.21	5597.42
																											3.317	691	3.317	6918		3.317	1480.83	3.317	5660.25
																											3.424	713.25	3.424	6649.25		3.424	1510.42	3.424	5618.5
																											3.531	693	3.531	6449.08		3.531	1543	3.531	5501.17
																											3.638	730.333	3.638	6303.58		3.638	1540.58	3.638	5523.42
																											3.745	736.25	3.745	6180		3.745	1543.42	3.745	5604.17
																											3.852	719.083	3.852	6199.83		3.852	1486.08	3.852	5542.92
																											3.959	723	3.959	6119.83		3.959	1489.58	3.959	5384.33
																											4.066	739.833	4.066	5979.42		4.066	1489.58	4.066	5290.42
																											4.173	740.833	4.173	5936		4.173	1458.08	4.173	5118.33
																											4.28	731.417	4.28	5844.67		4.28	1460.42	4.28	5048.67
																											4.387	723.833	4.387	5766.58		4.387	1453.58	4.387	4975.08
																											4.494	719	4.494	5742.25		4.494	1452.08	4.494	4932.75
																											4.601	718.083	4.601	5740.17		4.601	1475.17	4.601	5087.75
																											4.708	731.167	4.708	5767.33		4.708	1469.33	4.708	5170.67
																											4.815	744.75	4.815	5742.67		4.815	1458.83	4.815	5062.83
																											4.922	753.333	4.922	5598.42		4.922	1491.42	4.922	4992.42
																											5.029	758.583	5.029	5402.17		5.029	1478.92	5.029	4997.83
																											5.136	752.667	5.136	5220.92		5.136	1506.75	5.136	4931
																											5.243	774.167	5.243	5121.17		5.243	1487.5	5.243	4943.25
																											5.35	773.75	5.35	4958.67		5.35	1487.25	5.35	4901.25
																											5.457	763.167	5.457	4816.33		5.457	1545.75	5.457	4898.83
																											5.564	765.25	5.564	4714.08		5.564	1556.08	5.564	4910.67
																											5.671	772.917	5.671	4612.67		5.671	1533.83	5.671	4917.58
																											5.778	784.25	5.778	4536.83		5.778	1526.08	5.778	4978
																											5.885	792.25	5.885	4490.5		5.885	1526.08	5.885	4961
																											5.992	778.167	5.992	4427.83		5.992	1515.17	5.992	4932.33
																											6.099	785.667	6.099	4372.08		6.099	1504.17	6.099	4868.33
																											6.206	811	6.206	4317.17		6.206	1563.92	6.206	4816.33
																											6.313	802	6.313	4224.67		6.313	1565.42	6.313	4826.92
																											6.42	804.167	6.42	4069.33		6.42	1574.92	6.42	4808.08
																											6.527	805.583	6.527	3822.58		6.527	1578.83	6.527	4805.75
																											6.634	804.5	6.634	3632.5		6.634	1547.17	6.634	4661.42
																											6.741	805.833	6.741	3519.33		6.741	1526.42	6.741	4637
																											6.848	811.583	6.848	3441.83		6.848	1552.25	6.848	4667.83
																											6.955	808.333	6.955	3319.67		6.955	1572.25	6.955	4801.58
																											7.062	828.667	7.062	3131.67		7.062	1618.25	7.062	4913.92
																											7.169	826.75	7.169	3080.67		7.169	1656.58	7.169	5083.92
																											7.276	835.667	7.276	2991.17		7.276	1658.17	7.276	5152.17
																											7.383	871	7.383	2979		7.383	1659.67	7.383	5097.92
																											7.49	895.167	7.49	2882.83		7.49	1628.75	7.49	5052.83
																											7.597	876	7.597	2818.33		7.597	1619.92	7.597	4968
																											7.704	874.5	7.704	2756.75		7.704	1615.33	7.704	4829.33
																											7.811	863	7.811	2653.5		7.811	1638.92	7.811	4718.5
																											7.918	890.5	7.918	2635.67		7.918	1600.92	7.918	4615.25
																											8.025	857.583	8.025	2580.75		8.025	1561.33	8.025	4484.08
																											8.132	878.583	8.132	2523.67		8.132	1532.5	8.132	4398.5
																											8.239	854.75	8.239	2549.5		8.239	1532	8.239	4389.33
																											8.346	869.167	8.346	2493.08		8.346	1508	8.346	4410.25
																											8.453	863.167	8.453	2453.08		8.453	1505.83	8.453	4341.83
																											8.56	901.667	8.56	2459.42		8.56	1486.33	8.56	4360
																											8.667	918.417	8.667	2432.75		8.667	1460.42	8.667	4229.92
																											8.774	949.5	8.774	2435.25		8.774	1461.92	8.774	4221.58
																											8.881	959.167	8.881	2412.58		8.881	1514.5	8.881	4125.33
																											8.988	937.167	8.988	2387.08		8.988	1511.33	8.988	4060.83
																											9.095	884.833	9.095	2292.42		9.095	1515	9.095	3933.92
																											9.202	902.583	9.202	2255.25		9.202	1485.25	9.202	3860.67
																											9.309	868	9.309	2220.5		9.309	1470.75	9.309	3748.58
																											9.416	884.25	9.416	2148.83		9.416	1480.58	9.416	3725.75
																											9.523	880.167	9.523	2165.33		9.523	1503.92	9.523	3651.5
																											9.63	891.75	9.63	2096.58		9.63	1492.67	9.63	3645.5
																											9.737	904.5	9.737	2136.33		9.737	1524.25	9.737	3617.33
																											9.844	918.75	9.844	2145.5		9.844	1509.83	9.844	3578
																											9.951	928	9.951	2157.08		9.951	1524.58	9.951	3534.92
																											10.058	936.917	10.058	2181.33		10.058	1513.17	10.058	3536.5
																											10.165	936.333	10.165	2156.25		10.165	1511.42	10.165	3459.67
																											10.272	951.25	10.272	2156.83		10.272	1460.67	10.272	3473.08
																											10.379	980.167	10.379	2146.42		10.379	1472	10.379	3416.5
																											10.486	943.333	10.486	2150.08		10.486	1443.08	10.486	3413.75
																											10.593	925.25	10.593	2152.08		10.593	1493.83	10.593	3447.08
																											10.7	919	10.7	2151		10.7	1478.42	10.7	3520.25
																											10.807	904.917	10.807	2096.75		10.807	1425.75	10.807	3476.92
																											10.914	913.417	10.914	2146.25		10.914	1425.92	10.914	3512.25
																											11.021	915.75	11.021	2157.58		11.021	1403.67	11.021	3464.75
																											11.128	950	11.128	2190.25		11.128	1435.33	11.128	3456.08
																											11.235	956.167	11.235	2254.5		11.235	1455.08	11.235	3474.5
																											11.342	905.417	11.342	2225.92		11.342	1468.25	11.342	3448.83
																											11.449	923.583	11.449	2193.83		11.449	1511.42	11.449	3432.75
																											11.556	946.083	11.556	2240.42		11.556	1567.08	11.556	3438.17
																											11.663	963.25	11.663	2268		11.663	1505.42	11.663	3349.67
																											11.77	934.25	11.77	2251.92		11.77	1473.5	11.77	3288.92
																											11.877	920.25	11.877	2238.33		11.877	1427.33	11.877	3169.67
																											11.984	892	11.984	2245.83		11.984	1461.33	11.984	3192.5
																											12.091	890.333	12.091	2270.75		12.091	1479.33	12.091	3237.25
																											12.198	862.75	12.198	2273.92		12.198	1448.33	12.198	3265.75
																											12.305	881.917	12.305	2254.25		12.305	1451.92	12.305	3266.33
																											12.412	852.833	12.412	2223.17		12.412	1455.83	12.412	3231.5
																											12.519	859.333	12.519	2222.67		12.519	1435.92	12.519	3268.42
																											12.626	874.167	12.626	2229.67		12.626	1466.83	12.626	3280.58
																											12.733	881.583	12.733	2226.92		12.733	1457.25	12.733	3229.42
																											12.84	888.917	12.84	2259.17		12.84	1457.83	12.84	3245.75
																											12.947	897.5	12.947	2318.33		12.947	1481.42	12.947	3265.5
																											13.054	890.583	13.054	2345.5		13.054	1457.83	13.054	3242.83
																											13.161	851.417	13.161	2345.42		13.161	1469.75	13.161	3180.25
																											13.268	862.333	13.268	2271.42		13.268	1486.08	13.268	3133.17
																											13.375	851.917	13.375	2253.33		13.375	1496.58	13.375	3137.83
																											13.482	869.333	13.482	2184.58		13.482	1513.92	13.482	3144.08
																											13.589	854.167	13.589	2222		13.589	1515.25	13.589	3100.67
																											13.696	860.583	13.696	2230.42		13.696	1588.42	13.696	3233.5
																											13.803	859.917	13.803	2211.08		13.803	1537.33	13.803	3230.5
																											13.91	881.167	13.91	2222.5		13.91	1534.5	13.91	3223.67
																											14.017	877.167	14.017	2251.08		14.017	1524.92	14.017	3165
																											14.124	859.333	14.124	2267.08		14.124	1498.58	14.124	3169.92
																											14.231	861.667	14.231	2278.75		14.231	1460.42	14.231	3108
																											14.338	868.5	14.338	2284.5		14.338	1450.5	14.338	3084.17
																											14.445	874.667	14.445	2287.58		14.445	1420.17	14.445	2978.92
																											14.552	929.25	14.552	2365.67		14.552	1426.75	14.552	3011.25
																											14.659	931.75	14.659	2355		14.659	1486.5	14.659	2945.08
																											14.766	898.833	14.766	2380.83		14.766	1505.92	14.766	3076.58
																											14.873	881.167	14.873	2397		14.873	1536.75	14.873	3064.5
																											14.98	885.5	14.98	2410.58		14.98	1531.58	14.98	3157.08
																											15.087	869.167	15.087	2400.92		15.087	1550.25	15.087	3235.17
																											15.194	881.5	15.194	2407.42		15.194	1513.42	15.194	3283.92
																											15.301	871.417	15.301	2408.58		15.301	1478.42	15.301	3312.58
																											15.408	874.083	15.408	2489.58		15.408	1449.75	15.408	3291.42
																											15.515	882.5	15.515	2514.42		15.515	1433.5	15.515	3259.08
																											15.622	912.5	15.622	2592.25		15.622	1473.25	15.622	3293.67
																											15.729	873.25	15.729	2612.83		15.729	1526.33	15.729	3241.67
																											15.836	872.583	15.836	2657.42		15.836	1494.58	15.836	3195.5
																											15.943	876	15.943	2671.58		15.943	1505.17	15.943	3256.33
																											16.05	876.5	16.05	2750.42		16.05	1472.42	16.05	3277
																											16.157	884.417	16.157	2754.92		16.157	1457.17	16.157	3360.5
																											16.264	900.583	16.264	2848.83		16.264	1453.5	16.264	3419.75
																											16.371	910.583	16.371	2859.33		16.371	1399.75	16.371	3491.67
																											16.478	928.417	16.478	2912.25		16.478	1394.08	16.478	3501.83
																											16.585	913.5	16.585	2952.67		16.585	1382.75	16.585	3478.83
																											16.692	893.583	16.692	3057		16.692	1390.75	16.692	3502
																											16.799	888.583	16.799	3206.17		16.799	1445.92	16.799	3570.5
																											16.906	867.917	16.906	3213		16.906	1453.75	16.906	3588.58
																											17.013	872.167	17.013	3346.58		17.013	1428	17.013	3699
																											17.12	861.667	17.12	3369.75		17.12	1440.67	17.12	3673.17
																											17.227	872.667	17.227	3503.42		17.227	1399.67	17.227	3732.92
																											17.334	895.417	17.334	3624.58		17.334	1450.83	17.334	3807
																											17.441	882.5	17.441	3802.75		17.441	1411.33	17.441	3796.58
																											17.548	902.75	17.548	3899.25		17.548	1405	17.548	3863.58
																											17.655	877.917	17.655	4087		17.655	1383	17.655	3890
																											17.762	890.833	17.762	4319.17		17.762	1372.5	17.762	3938.58
																											17.869	853.75	17.869	4385.17		17.869	1398.67	17.869	4030.17
																											17.976	852.25	17.976	4501.42		17.976	1366.33	17.976	4082.58
																											18.083	834.667	18.083	4655.42		18.083	1354.33	18.083	4084.08
																											18.19	856.333	18.19	4751.5		18.19	1400.08	18.19	4104.83
																											18.297	860.083	18.297	4930.08		18.297	1425.33	18.297	4220.42
																											18.404	846.5	18.404	5156.5		18.404	1429.92	18.404	4206.83
																											18.511	823.5	18.511	5279.33		18.511	1466.42	18.511	4207.5
																											18.618	842.667	18.618	5488.17		18.618	1448.08	18.618	4238.33
																											18.725	831.333	18.725	5663.33		18.725	1416.92	18.725	4222.92
																											18.832	815.25	18.832	5771.58		18.832	1409.92	18.832	4276.83
																											18.939	773.5	18.939	5762.83		18.939	1419.92	18.939	4278.67
																											19.046	798.25	19.046	5778.42		19.046	1425.42	19.046	4341.67
																											19.153	784.583	19.153	5891.5		19.153	1425.33	19.153	4496.17
																											19.26	794.75	19.26	6002.42		19.26	1498.75	19.26	4532.42
																											19.367	814.25	19.367	6093.42		19.367	1519	19.367	4589.25
																											19.474	806.667	19.474	6236.25		19.474	1537	19.474	4656.25
																											19.581	849.333	19.581	6260.33		19.581	1493	19.581	4673.33
																											19.688	822.5	19.688	6413.67		19.688	1495.83	19.688	4750.75
																											19.795	782.583	19.795	6519.33		19.795	1470.25	19.795	4750.42
																											19.902	788.417	19.902	6553.42		19.902	1476.67	19.902	4806.5
																											20.009	786.917	20.009	6667.58		20.009	1474.17	20.009	4906.75
																											20.116	783.25	20.116	6794.67		20.116	1475.33	20.116	4920
																											20.223	777.833	20.223	6882.25		20.223	1481.58	20.223	4916
																											20.33	793.333	20.33	6948.42		20.33	1475.67	20.33	4955.17
																											20.437	764.583	20.437	6989.25		20.437	1479.92	20.437	5034.33
																											20.544	748.917	20.544	6979.92		20.544	1469.67	20.544	5132.5
																											20.651	751.5	20.651	6967		20.651	1430.58	20.651	5130.58
																											20.758	771.417	20.758	6991		20.758	1448.17	20.758	5122.83
																											20.865	760.75	20.865	7075.42		20.865	1438.25	20.865	5137.17
																											20.972	756.167	20.972	7043.83		20.972	1400.92	20.972	5150.5
																											21.079	755.667	21.079	7014.17		21.079	1439.5	21.079	5161.58
																											21.186	741.167	21.186	7009		21.186	1464.42	21.186	5178.67
																											21.293	756.833	21.293	7093.08		21.293	1471.83	21.293	5178.67
																											21.4	729.083	21.4	7160		21.4	1482.42	21.4	5160.17
																											21.507	741.25	21.507	7302.33		21.507	1446.17	21.507	5162.92
																											21.614	740.5	21.614	7402.83		21.614	1448.83	21.614	5274.25
																											21.721	771.75	21.721	7512.92		21.721	1492.33	21.721	5269.83
																											21.828	752.083	21.828	7443.17		21.828	1508.42	21.828	5346.67
																											21.935	751.083	21.935	7551.5		21.935	1547.75	21.935	5381.83
																											22.042	752.917	22.042	7510.42		22.042	1509	22.042	5489.33
																											22.149	767	22.149	7556.17		22.149	1530.83	22.149	5562.42
																											22.256	752.25	22.256	7661.75		22.256	1503.17	22.256	5596.67
																											22.363	741.917	22.363	7566.17		22.363	1509.75	22.363	5642.33
																											22.47	733.583	22.47	7470		22.47	1493.08	22.47	5637
																											22.577	734.583	22.577	7318.92		22.577	1461.92	22.577	5600.17
																											22.684	743.333	22.684	7253.08		22.684	1463.42	22.684	5552.17
																											22.791	756.75	22.791	7346.58		22.791	1429.08	22.791	5562.17
																											22.898	738.75	22.898	7339.75		22.898	1434.25	22.898	5654.08
																											23.005	714.75	23.005	7426.17		23.005	1393.75	23.005	5707.67
																											23.112	740.5	23.112	7507.75		23.112	1452	23.112	5752.58
																											23.219	739	23.219	7545.67		23.219	1443	23.219	5794.17
																											23.326	754.833	23.326	7485.92		23.326	1435.67	23.326	5766.25
																											23.433	749.333	23.433	7518.25		23.433	1443.67	23.433	5722.67
																											23.54	766.333	23.54	7450.5		23.54	1419.83	23.54	5686.08
																											23.647	751.333	23.647	7515.58		23.647	1424.58	23.647	5627.08
																											23.754	749.833	23.754	7560.75		23.754	1370.42	23.754	5709.42
																											23.861	708.333	23.861	7676.58		23.861	1392.08	23.861	5745.33
																											23.968	746.583	23.968	7685.08		23.968	1472.17	23.968	5701.67
																											24.075	756.417	24.075	7672.42		24.075	1458.83	24.075	5711.75
																											24.182	758	24.182	7663.67		24.182	1495.42	24.182	5735.75
																											24.289	773.667	24.289	7656.5		24.289	1484.83	24.289	5669.67
																											24.396	753.25	24.396	7730.83		24.396	1490.42	24.396	5674.83
																											24.503	753.167	24.503	7722.92		24.503	1439.17	24.503	5693.58
																											24.61	761.833	24.61	7757.08		24.61	1437.08	24.61	5720.33
																											24.717	752.583	24.717	7827.5		24.717	1404.25	24.717	5763.25
																											24.824	732.25	24.824	7902.58		24.824	1394.75	24.824	5786.33
