# Supplementary material for: Real-time monitoring of peptidoglycan synthesis by membrane-reconstituted penicillin-binding proteins
Source: eLife journal article supplement (doi:10.7554/elife.61525), 2021-02-24
Supplement: supp [file Figure 2 - figure supplement 1-source file.xlsx]

## Sheet: Fig2-figure supplement 1A
molar fraction of labelled lipid II (%)	14C-lipid II consumed (%)				Lipid II-Atto550 consumed (%)				Lipid II-Atto647n consumed (%)					PBP1B		PBP1B + LpoB			PBP1B		PBP1B + LpoB
	PBP1B		PBP1B + LpoB		PBP1B		PBP1B + LpoB		PBP1B		PBP1B + LpoB			final FRET		final FRET			slope (FRET unites/min)		slope (FRET unites/min)
	average	std. dev.	average	std. dev.	average	std. dev.	average	std. dev.	average	std. dev.	average	std. dev.		average	std. dev.	average	std. dev.		average	std. dev.	average	std. dev.
20	0.929125	0.0108804	0.978228	0.0151944	0.862957	0.0241317	0.858658	0.0328591	0.901529	0.00479863	0.894479	0.00349287		0.230942	0.00184551	0.290164	0.0451306		0.0173024	0.000148965	0.172246	0.0149207
50	0.929125	0.0108804	0.978228	0.0151944	0.689411	0.0416948	0.824759	0.0198998	0.82302	0.023663	0.892533	0.0114762		0.304789	0.00953739	0.57238	0.0154231		0.0163176	0.000443421	0.543836	0.0407031
66.6667	0.897822	0.0545138	0.957505	0.021261	0.722022	0.0264137	0.882797	0.00665286	0.843846	0.0126573	0.913921	0.0059785		0.4439	0.0132695	0.688982	0.0746746		0.0252672	0.00167162	0.613509	0.0509859
80	0.835314	0.0184717	0.938855	0.0208526	0.758288	0.011711	0.880326	0.0222289	0.867602	0.0025453	0.944493	0.00640556		0.41063	0.0182161	0.88382	0.0341774		0.0192582	0.00149969	0.546425	0.0263752

## Sheet: Fig2-figure supplement 1B
	Molar fraction of labelled material in PG
molar fraction of labelled lipid II	PBP1B		PBP1B + LpoB
	average	std. dev.	average	std. dev.
0.2	0.191844	0.00327351	0.18302	0.00420628
0.5	0.448702	0.0158561	0.46745	0.00791167
0.666667	0.635578	0.0199051	0.65235	0.00635559
0.8	0.795622	0.00831224	0.795389	0.0133813

## Sheet: Fig2-figure supplement 1C
molar fraction of labelled lipid II (%)	FI(665nm)/FI(578nm)					Fluorescence spectra at the end of reactions (excitation 526 nm)
	PBP1B		PBP1B + LpoB				80% fluorescent lipid II						66.7% fluorescent lipid II						50% fluorescent lipid II						20% fluorescent lipid II
	average	std. dev.	average	std. dev.			PBP1B			PBP1B + LpoB			PBP1B			PBP1B + LpoB			PBP1B			PBP1B + LpoB			PBP1B			PBP1B + LpoB
20	0.230942	0.00184551	0.290164	0.0451306		wavelength (nm)	r1	r2	r3	r1	r2	r3	r1	r2	r3	r1	r2	r3	r1	r2	r3	r1	r2	r3	r1	r2	r3	r1	r2	r3
50	0.304789	0.00953739	0.57238	0.0154231		550	7026	7254	8030	4483	4572	4477	7626	7009	7629	5816	5623	4189	4764	1792	5013	3190	4790	4826	4877	4368	4612	3733	3892	5099
66.6667	0.4439	0.0132695	0.688982	0.0746746		551	7969	8505	9249	5319	5328	5185	8465	8167	8692	6743	6185	4654	5441	2100	5912	3694	5519	5778	5350	4896	5219	4177	4458	5952
80	0.41063	0.0182161	0.88382	0.0341774		552	9810	9944	11059	6070	6420	6077	10097	9686	10333	8183	7687	5658	6699	2478	6773	4241	6646	6626	6599	5881	6335	5150	5171	7228
						553	11218	11781	12721	7015	7365	7173	12111	11692	12608	9968	9025	6904	7935	2969	8275	5357	7900	8083	7827	7273	7380	6091	6238	8592
						554	13811	13900	15276	8493	8712	8521	14368	13756	14733	11455	10664	8132	9324	3438	9516	6083	9269	9275	9000	8355	8731	7224	7347	9785
						555	16176	16322	18240	10009	10105	9911	16830	15986	17090	13466	12321	9434	10932	4095	11220	7248	10971	10741	10854	9771	10462	8372	8738	11710
						556	19183	19928	21166	12052	12028	11754	19906	18752	20355	16110	14573	11074	12833	4719	13500	8846	13048	12777	12983	11429	12351	10205	10221	13892
						557	22432	22775	24993	13782	14284	13650	23073	21812	23745	18873	17251	12864	15366	5660	15453	10084	15153	14840	15051	13502	14079	11593	12073	16350
						558	25675	26216	28378	15790	16374	15508	26659	26156	27280	21407	20407	14887	17659	6613	17791	11815	17646	17471	17267	15988	16463	13999	14044	19249
						559	29931	30060	32788	18574	18768	18327	31130	29591	32500	25178	23766	17119	20710	7676	21099	13633	20469	20313	20505	18322	19551	15848	16533	22531
						560	33791	34978	37360	21456	21061	21059	34797	33455	35861	28301	26255	19601	23449	8712	23687	15237	22937	22857	22804	20750	21514	18222	18438	25327
						561	38550	39529	43153	24176	24477	23979	39315	38504	41256	31937	29804	22047	26227	10044	27001	17472	26100	25628	25741	23292	24655	20544	21169	28886
						562	44437	44872	47286	27681	27412	26690	45272	43084	45953	36600	33281	24659	29438	11041	30449	19284	29459	29681	29252	26534	27951	23249	23582	33024
						563	48242	48831	53084	30351	30098	29562	49888	48407	51860	40449	37642	28103	32848	12494	33371	22326	32911	33084	32656	29701	30821	26826	26868	37251
						564	54090	55218	58920	33978	34213	33215	54987	52988	56695	44698	41738	30392	36502	13761	37406	24215	36423	36357	35944	32267	34364	28832	29335	40865
						565	59942	61244	66084	37599	38139	36685	60224	59007	63024	49860	46019	34182	40905	14949	40994	26431	40743	40313	40437	36437	37884	31923	32415	45864
						566	66188	67824	72285	41447	41092	40678	67050	64365	69540	54407	51123	37439	44342	16689	45556	29877	44763	44314	43569	39741	41682	35373	36061	51151
						567	72611	73565	78176	45130	45417	43972	72204	69815	74996	59005	54809	40605	47824	18003	49332	31986	49001	47855	47353	43502	45512	38431	39151	54755
						568	77722	79591	84251	48445	49042	47794	78420	75487	81581	63929	59352	44043	52209	19675	52664	34727	52184	51702	51412	46488	49164	42195	42379	59640
						569	81554	83963	88530	51150	51490	50059	83716	80396	86849	68970	64019	47292	55547	20718	57097	37064	56157	54782	55042	50572	52025	44445	45463	63842
						570	87007	87758	93916	54072	54459	53554	89038	85605	92890	73651	67584	50046	58730	22303	60322	39653	60065	59474	58952	52938	55226	47776	48417	68135
						571	91329	94158	98736	57333	57254	56089	92687	88876	96384	76123	70875	51807	61217	23442	62830	41128	62077	61408	60738	54559	57985	49547	50129	71505
						572	93723	96433	103339	59075	59865	57792	96654	93156	100906	80550	73801	54919	64117	23945	65422	42941	65010	64005	63502	56878	60568	51922	52874	74645
						573	98117	100350	107327	61812	62159	60311	98838	94679	102131	81607	75781	55825	66138	24640	66430	44442	66509	65876	65052	58820	62793	54335	53818	76080
						574	101167	104735	110372	64052	64344	62502	102269	98884	106796	84830	78466	58037	67425	25772	68667	45890	68472	68677	67633	60929	64377	55665	55745	79267
						575	104701	106679	113670	66287	66158	63831	104829	101720	109429	87484	81445	60044	69510	26264	71663	47016	70166	70665	69015	62487	66186	56623	58001	82363
						576	107089	108568	114817	66599	67932	65798	106440	102710	111086	88273	82058	60276	70040	26796	72185	47938	71413	71766	70122	63508	67036	57313	58734	83495
						577	107783	111305	117526	67310	68474	66919	106938	104178	112435	90219	83019	61628	71044	26901	72367	47887	72972	72787	71459	64072	67416	58840	59704	84267
						578	109402	112825	119626	69226	69677	68249	109485	106114	114816	90557	84427	63146	71706	27441	73759	49131	74810	72692	71341	65196	68666	59722	60179	86771
						579	106980	111234	116675	68243	68664	65642	109305	106070	114341	92399	84538	62505	71650	27329	74298	48315	73060	73860	72123	64910	69518	59300	61056	86569
						580	108300	110762	116612	68219	67884	66810	109670	105448	113327	91113	83776	62277	70722	27489	72917	48246	73779	72856	71949	64411	68513	58784	60414	86769
						581	107217	109734	116177	68173	67749	66768	108266	104743	111371	90178	84114	61863	70897	27560	72874	48303	73407	72794	71749	65190	68285	58943	59873	86519
						582	106592	110003	115207	67800	67079	66923	107208	104086	111961	90563	83361	62247	70547	27166	72493	47568	72372	71759	71409	64691	67669	58411	60602	85821
						583	105367	107800	113844	67012	67714	65968	106195	102845	111709	90172	82593	61496	69263	27000	71638	47537	71745	71303	69547	63892	67526	57897	58771	85585
						584	102347	105704	112424	65813	66041	63846	104759	102197	109235	87593	82304	60655	68682	26239	70599	46891	70743	70911	69339	62814	66236	57537	58257	84218
						585	101569	103965	109007	65529	64850	62577	101533	98070	105522	84839	78889	59288	66257	25346	68360	45610	68419	68201	66326	61142	63789	55657	56145	82270
						586	100151	103117	107999	63960	64163	62311	99309	96650	104132	85095	78118	58191	65978	25487	66899	44437	67787	67995	65628	59967	62744	54413	55385	80394
						587	97237	99856	105081	62654	63286	61203	97679	94844	102631	82235	76977	57370	63375	24391	65631	43430	65940	65993	64352	58711	61604	53788	53646	78651
						588	93758	96843	102237	60340	60873	58943	94519	91921	98557	80283	74287	55098	62416	23768	63349	42177	64639	63599	61866	56910	59803	52517	52883	76874
						589	91556	93699	98594	59069	58983	57001	91067	88908	96162	77948	71947	53758	59911	23375	61827	41466	62876	62391	60235	54545	57783	49920	51015	74280
						590	89546	91994	96687	57690	58272	56911	89653	87094	94325	75970	70625	52705	58542	22766	59857	40529	60969	59544	59220	54251	56564	49434	50077	73306
						591	86202	87433	92187	55019	55159	53818	86872	83595	89989	73716	68280	50213	56233	21656	57683	38915	58907	58176	56845	51769	54678	47223	47821	69484
						592	83094	85979	89194	53465	53988	52549	83009	81264	87475	71025	66246	48605	55038	21493	56242	37294	57465	56949	55479	50601	52286	45201	46557	68281
						593	80758	82864	87250	52539	53031	50975	80873	78735	84593	68938	64018	46378	52938	20424	54195	36399	54389	55109	54438	47942	51423	44668	45811	66697
						594	77924	80575	83916	49610	50140	49329	78687	76444	81799	67119	61720	45592	51012	19364	52785	35530	53334	53557	51715	46782	49728	43504	43889	64844
						595	74511	76615	80958	48485	48476	47463	75912	73420	79230	65164	59871	44578	49923	19159	50896	34254	51948	51545	49749	44774	48145	41919	42787	61934
						596	71760	73700	77919	46202	47178	46068	72624	69836	74959	62163	56973	41868	47079	18162	49122	32632	49530	48235	47485	43144	45767	39176	39789	59168
						597	69082	70871	75549	45080	45700	44850	69157	66158	71155	58781	53482	39556	45105	17131	45768	30898	46261	46237	44964	41077	42737	37395	38316	56860
						598	65259	67823	70990	42900	43026	41999	65980	64057	69742	56675	52404	38644	43511	16736	43771	29628	45164	45049	42824	39459	41941	36298	36760	53788
						599	63150	64843	67763	42030	40969	40621	63946	62209	66442	54207	50777	37938	42398	15885	42935	28478	43296	43943	42276	38286	40041	34738	34973	52299
						600	60914	63051	66395	40177	40383	39332	60878	59859	64154	52316	49109	35873	40943	15178	41126	27397	42059	40981	39958	36953	38305	33091	33693	50640
						601	58733	60435	63652	38984	39154	37943	58054	56740	60365	49491	46133	34670	38165	14806	38782	25920	40326	39650	38130	34864	36236	31449	32097	47669
						602	55916	57197	59666	36909	36180	35554	56183	53923	58444	48422	44942	32964	36527	14117	37629	25368	38202	37892	36551	33641	35162	30823	30813	45765
						603	53253	55379	58321	35742	35433	34782	54406	53417	56245	46325	43014	32123	35380	13527	36952	24108	36920	36954	35291	32372	34377	29532	29742	44482
						604	52205	53387	56117	34671	34657	33701	51287	50082	53491	44319	41294	29909	33984	12957	34460	23404	35491	34905	33705	30683	32250	27262	28514	42543
						605	49544	50071	53193	32334	32770	32593	49453	47854	51322	43025	39445	29377	32526	12212	33585	22427	33962	33659	32871	29601	30791	27282	27158	40784
						606	47997	49155	52086	31486	32759	31515	47785	46998	49921	41031	37826	28182	31593	12132	32741	22271	33107	32230	31173	28372	30094	26157	26466	39295
						607	45834	47487	49966	30940	30785	30096	46352	45849	49249	40155	37043	27278	30712	11475	31646	21016	32160	32147	30121	27410	28791	25328	25718	38267
						608	44305	45868	47965	29220	30422	29337	45014	43366	46146	38722	35393	26345	29290	11579	29925	20162	30437	30475	28356	26751	28063	23943	24523	37291
						609	42184	42951	45245	28909	28286	27681	43043	41654	45240	36883	34492	25842	28870	10516	28956	19446	29775	29434	27558	25792	26697	23240	23416	34890
						610	41253	42115	44912	27205	28112	27072	42320	40171	42909	36054	33255	24550	27805	10462	28455	19237	29088	28970	26958	25163	25905	22623	22682	34726
						611	40405	41069	43419	26827	26953	26185	40791	40410	42407	35641	32965	24577	26904	10410	27836	18825	28209	27508	26434	23751	25300	21891	22655	33650
						612	38400	40348	41581	25774	26768	26203	38955	37286	40352	33668	30780	23398	25567	9962	26624	18394	26946	27049	25225	23076	24226	20795	21477	32001
						613	38031	38486	41243	24912	25164	24465	37704	36839	38842	32486	30540	22280	24906	9200	25707	17233	26393	25977	24764	22075	23624	20258	20850	30875
						614	37087	38123	39527	24852	24620	24409	37319	35583	38468	32265	29500	21860	24199	9297	25213	17323	26801	25841	23846	21592	22906	19935	20567	30633
						615	36109	36669	39002	24424	24426	24158	36742	35462	38173	31363	29264	21755	24127	9022	24521	16863	25457	25217	23563	21736	22826	19467	19970	29593
						616	36221	36761	38561	23588	23965	23905	36188	34088	37453	30747	28573	21148	23514	8587	24497	16341	24902	24904	22785	21525	21681	19073	19679	29611
						617	35129	35980	37785	23944	24031	23205	35144	33473	35695	30527	28331	20649	23036	8393	24117	16093	24217	24056	22690	20927	21666	18751	18478	28451
						618	34538	35423	37471	23104	23480	22955	34779	33114	35623	30014	28250	20339	22544	8547	23126	15982	23726	23704	21870	20810	21310	18473	18438	28108
						619	33804	35130	36716	23241	22867	22247	33647	33319	35332	29889	27372	20074	22482	8436	23130	16009	23706	23183	21711	19960	20868	18405	18465	28118
						620	33876	34261	36254	22959	23372	22706	33673	32543	34761	29108	26637	18956	22216	8279	23065	15635	23844	23312	21499	19439	19973	17739	17925	27179
						621	32716	33510	35001	22472	22648	21691	32953	32280	34486	28606	27236	19548	21170	8201	22238	15535	23129	22440	21178	19222	19737	17299	17675	27010
						622	32712	33569	35571	22199	22087	21627	32599	32435	34810	28070	26286	19781	21710	7985	22280	15080	22761	22968	21173	19749	20109	17732	17938	26869
						623	32873	33188	35300	22631	22628	21881	32406	31423	34204	27711	26200	19742	21486	8405	22686	15116	22738	22013	20799	19388	20006	17625	17911	27032
						624	32230	32379	34127	21854	22391	22008	32418	31145	33355	28013	25840	19508	21616	7630	21977	15201	22662	22539	20380	18571	19505	16834	17623	26195
						625	31480	32210	34115	22223	22018	21157	31694	31038	33191	28149	26201	18627	20920	7956	21342	14857	22389	22343	20412	18910	19714	16625	16737	25859
						626	31247	32074	33489	21808	21988	21479	31498	30607	33498	28018	25945	18972	20964	7920	21534	15277	21988	22038	19674	17965	19511	17059	17237	25549
						627	31241	31773	33395	21933	21781	21728	31749	30955	33128	28129	26512	18875	21326	7468	20922	15091	22943	21998	20524	18019	19543	16521	17056	26159
						628	31416	31771	33663	22233	22621	22169	30764	30467	32386	27807	25020	18912	21029	7718	20786	14387	22958	22023	19409	18193	18951	16571	16838	25423
						629	31267	31211	33870	21613	22075	21365	30570	30046	31778	27199	26164	19131	20538	7749	21334	14670	22295	21570	19543	18171	18924	16210	16070	24953
						630	31173	31496	33636	22282	22029	21484	31106	30064	32041	28219	25427	18767	19820	7772	20739	14748	22327	21208	18900	17842	18656	16114	16735	24926
						631	31152	30903	33027	22577	22571	21795	30677	30505	31356	27553	25626	19480	20030	7507	20250	14449	23014	21339	19099	17262	17870	15752	16842	25183
						632	31191	31509	33548	22593	22619	22259	30917	30113	31102	27532	25912	19184	19862	7299	20632	15005	22460	21554	18953	17392	17756	16166	16434	24669
						633	30339	30596	32149	21673	22194	22204	30400	29524	31148	27419	25663	18834	19802	7323	20171	14821	22120	21666	18817	17569	17762	15823	16486	24996
						634	29906	31239	32115	22869	22392	22496	29640	29740	31727	27186	26255	19529	19557	7290	20287	15026	22170	21603	18148	16559	17736	15320	15545	24071
						635	31110	30033	32754	22348	23705	23191	30703	30440	31907	28180	26972	19765	20282	7186	20402	14910	23063	21667	17624	16561	17507	15332	15757	24137
						636	30841	31272	33202	23596	23879	23991	30566	29795	30497	27271	26152	18842	19360	7495	19479	15044	22108	21967	18002	16735	16601	15276	15185	23897
						637	29893	30873	32485	24536	24536	24055	30441	29853	30785	27435	26751	20432	18890	7188	20532	14993	21889	22325	17208	16690	17444	14871	15470	24325
						638	30298	30355	32578	24021	24615	24736	31024	29927	32147	28793	28071	21341	19023	7022	19700	15635	23276	22377	17541	16584	17068	14625	15665	23874
						639	30408	30872	32369	25162	26431	25452	30710	30292	31986	29619	27959	21046	18829	7029	19908	16009	23437	23812	17765	16423	16868	14802	15204	23309
						640	30472	31334	32887	26150	27209	26778	30686	31041	32867	29805	29220	22155	19480	6749	19460	15062	23198	23265	16765	15457	16607	15090	15406	24075
						641	31593	31169	32882	27185	27743	27153	30543	30911	32858	30252	30236	21884	19084	7233	19876	15807	25015	23545	17767	16259	16554	14841	15278	24781
						642	32442	32276	33715	28731	28710	28788	32235	31884	33380	31561	30838	22643	19349	7063	19882	16060	24813	24461	17200	15564	17089	14766	14836	24185
						643	32646	33111	33360	29804	30670	30290	32971	33575	33761	32165	32308	24837	19457	7488	20234	16572	26886	25585	16919	16310	16737	15440	15466	25129
						644	33223	32930	34487	30898	30851	30907	33064	33081	34690	32762	32727	24937	19364	7329	19877	16767	26071	25834	17254	15214	16556	14765	14330	24622
						645	33955	33509	35223	32917	32979	32625	33964	33938	35564	35299	35484	26418	20440	7149	20316	18089	27257	27553	17956	15787	16198	15115	15217	25971
						646	34624	34583	35542	34605	35017	34185	35080	35080	36786	34868	35876	27468	19553	7730	20996	18427	28319	28395	17079	15830	16274	14505	15627	25437
						647	35632	35206	36622	35451	37371	36543	35502	37140	37857	37880	37316	29581	20450	7373	20839	18406	29827	28360	16875	16495	17258	15158	15436	26029
						648	37406	36417	38827	37833	39049	38580	37184	36805	37837	39149	40119	29425	19977	7484	20516	19517	30613	30093	16994	15593	16194	15427	15200	26495
						649	37240	37341	39457	40201	39969	39766	37824	39235	39206	40336	40631	31931	20685	7633	21366	20869	30941	31187	17081	15284	16961	14521	14883	27511
						650	38910	37658	39331	41409	41295	41647	38697	39430	41686	42775	42864	33224	21333	7636	21625	21387	33066	32106	17117	15865	16582	15964	15900	27568
						651	39933	39527	41212	43028	44525	44404	38710	39694	41313	43297	43871	33138	21319	7714	21390	20786	33742	32874	16767	15437	15468	15762	15757	27145
						652	40182	39568	41187	46383	46107	46133	40557	41276	42187	45029	46237	35434	21132	7690	22663	22231	34539	34133	17493	15244	16447	15848	16457	27088
						653	41528	40522	43285	46533	48573	48355	43200	42998	43344	47002	47827	37753	22029	7540	22013	23759	36938	36091	16597	16528	16789	15953	15905	29004
						654	42879	41704	42611	48321	49803	49179	44640	44405	45176	48178	50486	40178	21503	7864	22563	24488	37389	36344	17095	16182	17237	15503	16882	29509
						655	44403	42802	44414	50748	51381	51689	44633	44308	45126	48077	51207	39951	22686	7739	22328	24108	37834	36994	17136	15680	17036	15988	16453	28941
						656	45135	43069	44416	52387	52704	52975	43956	45366	46327	50707	52813	41043	22844	8115	23903	24605	39236	37998	16904	15045	16979	15839	15621	29014
						657	44990	43816	45108	54165	54401	56613	45391	47220	48170	51474	54177	42966	22864	8060	23318	25690	40234	40146	17459	15825	17188	16120	17376	30322
						658	45486	43451	45020	54636	56187	56471	46091	48181	48629	53001	56181	43724	23382	8036	23848	25889	41495	40538	17084	15043	17102	16048	17162	30613
						659	45314	44848	45594	56307	56935	58010	45861	46743	48172	51988	56046	44152	23483	8339	23440	26702	41679	41231	16412	15051	15989	15430	16070	29679
						660	45351	45082	45473	57422	58511	59036	46017	48310	48367	54137	56596	44051	22938	8811	22688	27369	42360	41278	17437	15106	16592	15727	16054	30469
						661	46525	44976	47028	58152	59886	59939	47987	46994	48887	55234	58880	45426	22978	8041	22905	26346	44043	41171	16849	15460	16578	16333	16002	30535
						662	47380	45213	46412	57998	60152	60636	48334	48068	50161	55674	58939	46589	21884	8015	23745	26770	43141	42555	16084	15566	17059	16084	16139	30458
						663	48004	45889	47710	58955	61337	62843	47584	48817	49980	55795	59039	47486	22713	8358	23218	26854	43500	43072	16737	15336	16282	15602	15903	30167
						664	46769	45263	46438	56467	61417	59904	47396	47994	50559	55120	59220	47043	21853	7789	22660	27084	43483	41596	16212	15008	16039	16024	16089	30038
						665	47029	44230	46427	59166	57926	61096	48224	49144	49107	55053	59901	46294	22746	7624	22635	26747	43280	41528	16644	14691	16243	15575	16035	29138
						666	44897	43599	45883	56599	59524	61289	45562	46998	47960	54804	56966	46196	21318	8081	22853	26382	42064	40704	15918	15238	15422	15208	15651	28376
						667	44889	43325	44873	57365	58796	59637	46123	46697	48144	52931	57491	45833	21250	7862	21611	27382	41894	39056	15857	13679	15063	14890	14992	27814
						668	44202	43045	44218	57595	58655	57854	44202	44436	48467	50983	54431	45375	21284	7793	21996	26107	41029	39217	14866	14008	15271	14413	15149	28551
						669	42715	40571	42164	56136	57187	57470	43632	45284	45234	50230	54726	43724	20419	7407	20636	24097	41405	38853	15164	13488	13963	14764	14622	26658
						670	43740	41120	41577	53938	58352	56197	42120	43016	44016	50335	52835	44447	20232	6974	20698	24603	39870	39853	14138	12379	13543	13758	14250	26698
						671	42149	39455	42292	53075	55357	56404	42892	43366	44350	50015	53755	43008	19768	7356	20484	23267	38900	38006	14434	12743	13164	14103	14524	26605
						672	42096	40738	42373	54555	55497	55349	40914	41930	43657	48681	51645	41283	19007	6844	19099	23763	38004	36693	13890	11748	13641	13262	12801	25915
						673	39956	38285	38982	50373	52759	54898	40205	41513	40682	46821	50115	41866	18264	6511	19477	24432	37846	36548	13691	11858	13462	13195	12956	25692
						674	38637	37797	37906	50192	53185	52118	38647	38884	40187	47516	50301	41274	17867	6716	19437	22449	36138	35516	13264	12899	13096	12839	13373	24079
						675	37364	35515	35965	48177	50281	50240	37629	38334	39937	44900	47442	39651	18125	6076	18095	23425	35893	33953	12754	11416	13489	12489	12386	24916
						676	37737	34500	36566	47363	48196	49620	36355	38643	38464	43610	45465	37188	16965	6147	16976	20909	33445	33783	11756	11345	11640	12579	11430	21858
						677	34253	32998	34886	44597	46976	46420	33489	36042	36959	41804	45165	35966	16172	5674	16575	20362	32005	32507	11719	10836	11490	11218	10879	22337
						678	33560	33278	32872	42843	44186	44683	34633	35638	35141	40370	42594	38032	15041	5748	15967	19953	32646	30602	11371	10287	10592	11518	11066	20349
						679	32747	30946	31870	41203	42700	42256	32911	32923	34853	38700	42946	35063	15122	5742	15403	19508	31075	28350	11520	10175	10596	10304	11251	19800
						680	29769	29720	32091	41122	42958	43298	31057	31349	32759	36673	40308	31993	14198	4959	15061	18416	28918	27216	10113	9481	10818	10065	10417	18975
						681	29892	29905	29033	37384	38824	40239	28881	32191	33531	35325	38003	31509	14340	5534	14441	16601	27997	27391	9324	9943	10107	9286	9905	19178
						682	29441	27677	29036	35779	38680	38248	28356	29990	31427	33453	36497	30290	13512	4574	14936	17262	26945	26344	9735	9186	9291	9382	9003	18673
						683	28027	25375	27215	34957	36364	35187	28095	28420	29070	33563	36553	27364	12640	4493	13858	16456	25240	24252	9839	9636	9135	9203	8837	17702
						684	27399	24462	26233	32542	34003	34101	26177	27048	28102	31193	32963	28130	12744	4075	13011	14233	24252	22566	9737	8993	8782	8824	8374	16425
						685	24324	24748	25404	32058	31868	32627	24076	26849	25696	30146	31358	27126	12038	4348	12228	14460	24543	22953	8901	7777	8492	8186	8069	15730
						686	23477	22630	24279	30390	30677	31464	23416	23628	24415	28227	29104	25080	11557	4447	11890	14159	21435	21768	8713	7337	7579	7609	7594	14718
						687	22503	22409	22158	28514	29534	28404	22943	24183	24402	27557	27855	23414	11079	4237	10561	12774	20840	19082	8568	7501	8129	8145	7909	13794
						688	20542	21455	22042	28841	29525	29004	21211	22808	21716	25433	28449	23363	10369	3962	10157	13206	20721	20086	7239	7092	8315	7989	7108	13988
						689	20778	19220	21116	25722	26484	28161	21641	20287	22217	24909	25841	21269	10584	3505	9330	11244	19575	19000	7027	6536	6265	6587	7265	14241
						690	20754	20525	20084	24277	27519	27642	20102	21053	20772	24859	25229	21212	9637	3471	9884	11452	19943	18886	7188	6836	7558	6325	6924	11328
						691	19725	18971	19578	24210	25001	24449	18364	19284	19982	23604	23475	19780	10239	3934	9265	12133	16747	17703	6783	6508	7059	6544	6820	13052
						692	18278	18182	18297	22995	24294	23549	18507	20283	20226	21887	23721	19863	9015	3629	9492	11536	16922	16864	6551	6455	6799	6379	6341	12281
						693	17814	19102	18171	21698	22768	23759	17418	18607	19875	21757	22649	17972	9392	3606	8580	10344	17081	16645	6678	5925	5865	6777	6044	11097
						694	16931	15591	17302	19983	21881	22767	16746	16808	18395	19158	21365	16663	8167	3588	9012	9260	15941	15178	6929	5609	6022	5733	6352	11817
						695	17552	14919	16353	19029	21148	22625	15925	15754	16739	19307	20977	15305	7770	2954	9097	9226	14277	15904	5694	4945	5801	5865	5544	10553
						696	16153	16376	16109	19139	20766	19228	14014	15752	16443	18493	19496	16042	8311	2696	7954	8199	14059	13123	5993	5414	5325	5526	5704	10205
						697	14727	14518	13823	17441	17580	17881	15145	17046	15794	16142	19226	15493	7166	3108	7955	9254	14588	13730	4963	4430	5265	5659	5079	9625
						698	14671	13102	13826	17663	17590	17494	14212	15588	14864	16094	17011	15491	7118	2896	7360	9338	13320	13102	4995	4295	5236	4971	5767	9024
						699	13945	14046	13469	16980	18561	17432	14372	15701	14899	15601	16529	13820	7499	2809	7650	8528	12491	12967	4289	4138	5167	4891	4816	7800
						700	13872	12532	12558	17550	17288	16105	11954	14266	13846	14739	16893	12664	7593	2785	6411	7987	11902	13084	4414	4204	4677	4755	4519	8565
						701	13081	13218	14589	17331	16563	16536	14315	14836	14918	15192	14342	13711	6554	2797	6664	7870	11710	11381	5402	4854	5101	4305	4196	7624
						702	12441	12754	12412	15259	16540	15430	12441	11786	13266	14918	16256	14405	6975	2932	6377	7430	11729	11017	4327	4441	4726	4783	5494	9423
						703	12812	11714	13583	13405	14828	13375	11240	13168	11833	12901	15837	11892	5991	2521	6702	6702	11299	9045	4449	4626	4626	4626	3944	7622
						704	12426	11591	11128	14497	15424	15610	10726	12828	12920	12828	14620	12240	6120	2473	5626	5811	9953	10664	4760	4451	4544	4173	4513	7666
						705	11813	10877	11103	13105	13911	13556	10781	11555	11168	13750	12362	11297	6100	2453	5390	6455	10651	10845	4002	3550	4519	4293	4971	7617
						706	11014	10376	10645	10947	12593	13902	10511	11316	11451	11686	13130	11149	6011	2888	4836	5608	10746	10242	4500	3761	5171	3727	3962	6817
						707	11060	10255	11480	11340	11165	12600	12250	10150	9975	11585	11795	9730	5180	2870	6475	5775	8960	9345	4795	4550	4130	3640	3710	7315
						708	9688	10967	10456	12539	12247	12247	10383	11114	10163	12284	13088	9725	4460	2047	5630	5886	8664	9469	4350	3583	4021	3948	3875	7239
						709	9383	9269	8964	13312	12435	12282	10757	9917	10451	12511	11252	8964	5722	2518	5493	6294	8659	10299	4234	3700	4348	4272	3814	5760
						710	9781	9260	9340	12748	11104	11064	9260	9220	10824	10864	11385	9541	5051	1964	5332	5572	7897	8539	4289	4450	3448	3367	4209	6494

## Sheet: Fig2-figure supplement 1D
Initital slopes for reactions						Reaction curves
molar fraction of labelled lipid II (%)	Slope (FRET units/min)						80% fluorescent lipid II						66.7% fluorescent lipid II						50% fluorescent lipid II						20% fluorescent lipid II
	PBP1B		PBP1B + LpoB				PBP1B			PBP1B + LpoB			PBP1B			PBP1B + LpoB			PBP1B			PBP1B + LpoB			PBP1B			PBP1B + LpoB
	average	std. dev.	average	std. dev.		time (min)	r1	r2	r3	r1	r2	r3	r1	r2	r3	r1	r2	r3	r1	r2	r3	r1	r2	r3	r1	r2	r3	r1	r2	r3
20	0.0173024	0.000148965	0.172246	0.0149207		0	0.571046	0.564237	0.559416	0.749678	0.770965	0.772632	0.493783	0.488647	0.460278	0.744554	0.676082	0.638642	0.501381	0.507648	0.494077	0.621009	0.612903	0.601922	0.421266	0.414936	0.417635	0.436739	0.440085	0.459058
50	0.0163176	0.000443421	0.543836	0.0407031		0.33	0.563323	0.56235	0.55745	0.923001	0.958752	0.965875	0.488498	0.491553	0.452583	0.950628	0.880545	0.805673	0.504864	0.494711	0.483394	0.783533	0.788352	0.787381	0.39709	0.409416	0.41462	0.485877	0.478338	0.544163
66.6667	0.0252672	0.00167162	0.613509	0.0509859		0.67	0.566289	0.565196	0.559372	1.10605	1.14111	1.16219	0.490124	0.493754	0.460509	1.12215	1.08616	1.08382	0.497572	0.498378	0.493508	1.01417	0.952382	0.962245	0.419257	0.416917	0.408199	0.566884	0.542294	0.561864
80	0.0192582	0.00149969	0.546425	0.0263752		1	0.563405	0.563346	0.556355	1.26893	1.31607	1.34606	0.493863	0.49011	0.452902	1.23939	1.23653	1.04346	0.499769	0.497683	0.487953	1.07318	1.09546	1.081	0.414779	0.416939	0.409766	0.620556	0.601628	0.634865
						1.33	0.565326	0.560459	0.553297	1.41314	1.46585	1.50028	0.493739	0.489917	0.447729	1.3157	1.35195	1.59264	0.499734	0.503464	0.485372	1.16661	1.15513	1.16743	0.400311	0.409019	0.411892	0.662037	0.655005	0.673841
						1.67	0.562649	0.560782	0.553859	1.53691	1.59971	1.64273	0.488564	0.488699	0.444744	1.36072	1.43881	1.66139	0.489018	0.501141	0.493282	1.22549	1.22593	1.22692	0.401732	0.411146	0.404962	0.698125	0.684342	0.674465
						2	0.568125	0.558002	0.557913	1.64275	1.71148	1.76106	0.494694	0.492166	0.449113	1.3932	1.49742	1.17906	0.500115	0.490825	0.487886	1.25069	1.2631	1.26521	0.423118	0.412449	0.405724	0.717278	0.699167	0.743582
						2.33	0.571261	0.567837	0.561128	1.73235	1.81504	1.86785	0.492364	0.495394	0.45053	1.42575	1.54578	1.66648	0.501306	0.498175	0.488106	1.2739	1.30534	1.30657	0.410934	0.415741	0.406871	0.712602	0.708766	0.752727
						2.67	0.573553	0.562819	0.561522	1.82063	1.88518	1.95971	0.496985	0.499828	0.457072	1.44078	1.58051	1.73511	0.492356	0.499111	0.486724	1.26519	1.32895	1.33631	0.429257	0.415738	0.411794	0.725024	0.722509	0.771222
						3	0.575611	0.567211	0.561037	1.88196	1.96971	2.03021	0.497294	0.497746	0.45125	1.46053	1.61519	1.79322	0.498385	0.500778	0.482691	1.33278	1.3504	1.34471	0.42033	0.409569	0.411162	0.740527	0.732348	0.755464
						3.33	0.572568	0.568307	0.55989	1.94231	2.02872	2.08717	0.500987	0.499464	0.463786	1.4724	1.631	1.814	0.499463	0.499374	0.485682	1.33243	1.36525	1.36928	0.428594	0.410572	0.410354	0.738374	0.735646	0.788767
						3.67	0.578605	0.566014	0.565997	2.01351	2.08882	2.14571	0.50193	0.501659	0.470947	1.49077	1.64408	1.84481	0.492687	0.494178	0.488513	1.37964	1.39361	1.38276	0.422872	0.416138	0.411477	0.746904	0.739952	0.801505
						4	0.575864	0.574265	0.563468	2.05994	2.13786	2.20002	0.499158	0.501959	0.467771	1.48686	1.66404	1.87316	0.496749	0.491482	0.492492	1.38123	1.41252	1.40194	0.415999	0.417267	0.409583	0.756173	0.743446	0.672046
						4.33	0.58293	0.567251	0.566799	2.11096	2.16904	2.24961	0.502735	0.504384	0.474161	1.5025	1.67767	1.90218	0.491545	0.5	0.488557	1.38926	1.4157	1.42031	0.411013	0.417722	0.406131	0.764719	0.759232	0.748985
						4.67	0.584619	0.565926	0.564687	2.14454	2.2128	2.28022	0.507834	0.50494	0.473032	1.51606	1.68348	1.91789	0.497169	0.506073	0.487151	1.40729	1.43724	1.43461	0.404059	0.41512	0.401962	0.77215	0.776261	0.879968
						5	0.582509	0.57215	0.571565	2.16872	2.25278	2.31717	0.51104	0.507815	0.48967	1.5168	1.71069	1.94895	0.493863	0.504589	0.497778	1.41826	1.44019	1.45053	0.411689	0.411789	0.41195	0.772695	0.790831	0.842962
						5.33	0.585171	0.578352	0.570252	2.20798	2.28467	2.33886	0.510578	0.511833	0.480792	1.5304	1.71442	1.9539	0.498993	0.509612	0.496541	1.42781	1.45641	1.45455	0.41093	0.415773	0.409063	0.773507	0.772315	0.816517
						5.67	0.591083	0.579614	0.579019	2.23469	2.30791	2.38266	0.51126	0.515858	0.459913	1.53614	1.73177	1.98357	0.498065	0.505893	0.48906	1.44671	1.46626	1.47486	0.415888	0.418968	0.414105	0.779765	0.774384	0.821273
						6	0.594296	0.580817	0.57604	2.25109	2.33442	2.41798	0.518447	0.520841	0.471263	1.54634	1.74	1.99089	0.498729	0.50795	0.489462	1.44473	1.47919	1.48921	0.415666	0.420412	0.408355	0.79559	0.777297	0.760434
						6.33	0.59346	0.582889	0.581548	2.28218	2.35895	2.43822	0.518702	0.520553	0.462677	1.54911	1.74533	2.01574	0.497302	0.498475	0.493124	1.4559	1.48779	1.48455	0.428241	0.420605	0.420216	0.786206	0.781242	0.835614
						6.67	0.598223	0.589321	0.582478	2.31171	2.38793	2.45098	0.52294	0.529065	0.46236	1.56177	1.74544	2.2106	0.497596	0.504045	0.499151	1.47454	1.49798	1.50927	0.421349	0.42222	0.409866	0.787761	0.78429	0.807527
						7	0.604126	0.593624	0.584721	2.33477	2.408	2.47699	0.529188	0.529432	0.482117	1.57384	1.76782	1.04627	0.506926	0.504118	0.498833	1.47413	1.50899	1.51084	0.408756	0.41895	0.415308	0.793824	0.792133	0.996957
						7.33	0.602929	0.594795	0.589271	2.35811	2.42131	2.49892	0.527582	0.53607	0.47311	1.57808	1.7815	2.32292	0.508995	0.508275	0.49522	1.49266	1.52504	1.525	0.417768	0.428641	0.414945	0.795844	0.802762	0.83189
						7.67	0.604347	0.59968	0.592011	2.37945	2.45297	2.52189	0.534382	0.540136	0.490836	1.58037	1.79293	2.29661	0.505455	0.507549	0.501029	1.49816	1.52617	1.53312	0.43159	0.422192	0.418579	0.796886	0.792441	0.832267
						8	0.61364	0.601797	0.600627	2.39704	2.45559	2.54129	0.541657	0.545027	0.497766	1.58897	1.79822	2.29091	0.50619	0.504845	0.498322	1.50734	1.53392	1.53781	0.424876	0.427446	0.417575	0.811543	0.807802	0.826954
						8.33	0.617418	0.599724	0.5971	2.40449	2.46974	2.53393	0.547904	0.550238	0.503234	1.59982	1.81679	2.37349	0.509385	0.507807	0.503604	1.51506	1.55159	1.54252	0.437348	0.432795	0.419139	0.815384	0.817459	0.853813
						8.67	0.621363	0.608559	0.604575	2.41216	2.50102	2.56005	0.554639	0.556769	0.501889	1.60399	1.81063	1.38386	0.513614	0.523494	0.503732	1.52087	1.55554	1.54981	0.439616	0.431093	0.418125	0.807423	0.815384	0.872777
						9	0.624171	0.614368	0.604805	2.43526	2.50539	2.57903	0.554353	0.561479	0.494356	1.60076	1.83584	2.32153	0.516159	0.506311	0.504621	1.52935	1.56617	1.56172	0.429843	0.433091	0.420741	0.821624	0.828922	0.82529
						9.33	0.631181	0.615784	0.606957	2.43951	2.51758	2.59576	0.563674	0.568325	0.500251	1.61527	1.83306	2.45216	0.512862	0.515402	0.513462	1.52564	1.57547	1.58112	0.42666	0.431769	0.420251	0.820589	0.820838	0.854448
						9.67	0.62933	0.614327	0.614231	2.44901	2.52454	2.60313	0.566391	0.577696	0.524028	1.61604	1.84283	2.28753	0.51829	0.521913	0.511561	1.54408	1.57457	1.58529	0.437302	0.438647	0.424188	0.826609	0.835602	0.786061
						10	0.639924	0.620364	0.617048	2.47546	2.54879	2.61727	0.575188	0.576655	0.505259	1.63724	1.85078	2.36329	0.521191	0.521983	0.51702	1.54838	1.58869	1.58852	0.4466	0.440853	0.424573	0.812974	0.83487	0.777558
						10.33	0.640827	0.630697	0.619242	2.48031	2.55647	2.6233	0.580417	0.589047	0.516292	1.63153	1.85702	2.38484	0.522994	0.528678	0.516758	1.5578	1.59877	1.59414	0.453114	0.436238	0.430532	0.830016	0.838748	0.872016
						10.67	0.64797	0.627894	0.62671	2.4861	2.5592	2.63111	0.585752	0.59668	0.533178	1.65094	1.871	2.39187	0.524091	0.524964	0.52105	1.56944	1.60716	1.59737	0.462597	0.44964	0.438292	0.818362	0.82947	0.875526
						11	0.655478	0.637158	0.630686	2.515	2.56693	2.65546	0.590174	0.600705	0.525108	1.65341	1.87011	1.43708	0.526665	0.526967	0.520701	1.58169	1.60599	1.60414	0.453492	0.445954	0.433873	0.827403	0.832213	0.871984
						11.33	0.657301	0.639323	0.632797	2.50911	2.59194	2.66397	0.596894	0.607683	0.551006	1.65774	1.88316	2.17366	0.537402	0.529403	0.527167	1.59408	1.62522	1.62305	0.454129	0.45527	0.430807	0.848015	0.844549	0.78005
						11.67	0.660657	0.644631	0.642055	2.52017	2.6008	2.6688	0.606574	0.612151	0.535849	1.65992	1.89095	2.17705	0.54285	0.542097	0.533396	1.57486	1.62676	1.63123	0.458712	0.455234	0.441688	0.835589	0.854775	0.874449
						12	0.674491	0.648454	0.645968	2.53082	2.59924	2.6805	0.61427	0.622586	0.543019	1.66557	1.90104	2.18954	0.545395	0.546226	0.536375	1.59383	1.63263	1.62671	0.478758	0.465303	0.446739	0.845124	0.839619	0.878708
						12.33	0.677548	0.656203	0.648348	2.54176	2.611	2.68901	0.621523	0.633893	0.564766	1.68292	1.9062	2.208	0.545905	0.541089	0.535107	1.601	1.6398	1.63398	0.466329	0.454204	0.447786	0.841911	0.85047	0.800826
						12.67	0.681791	0.655321	0.651628	2.5438	2.62052	2.69917	0.631655	0.641488	0.57207	1.67801	1.9259	2.35013	0.547088	0.543657	0.532518	1.61677	1.6454	1.64047	0.46817	0.469537	0.455092	0.832069	0.837051	0.782575
						13	0.692584	0.664325	0.656042	2.5473	2.61134	2.6949	0.632	0.648317	0.555472	1.68662	1.91935	2.45151	0.552845	0.548445	0.54151	1.61987	1.6569	1.64095	0.491971	0.477056	0.46542	0.846377	0.84672	0.876582
						13.33	0.69621	0.66897	0.665356	2.55788	2.63962	2.70099	0.640127	0.653467	0.557632	1.69308	1.92804	2.45018	0.560765	0.55078	0.543458	1.60683	1.66667	1.65105	0.49768	0.474826	0.463488	0.838339	0.838424	0.888544
						13.67	0.703145	0.675191	0.669542	2.57291	2.64831	2.71428	0.65032	0.661386	0.576724	1.70065	1.93198	2.48303	0.560503	0.565114	0.547706	1.62374	1.67489	1.67242	0.482402	0.477279	0.455698	0.863093	0.850723	1.05028
						14	0.706646	0.677704	0.666883	2.57058	2.64779	2.71204	0.658207	0.671619	0.570498	1.70654	1.93792	2.01167	0.566911	0.563715	0.551915	1.61185	1.6934	1.66938	0.498296	0.482317	0.472762	0.850452	0.849741	0.934429
						14.33	0.71495	0.680931	0.67775	2.58623	2.65141	2.7334	0.661423	0.680728	0.579475	1.70898	1.93862	2.5519	0.577749	0.567983	0.556419	1.64649	1.69796	1.66581	0.500856	0.489569	0.468642	0.846718	0.849295	0.9021
						14.67	0.724094	0.688889	0.683926	2.58414	2.66646	2.72755	0.679536	0.689083	0.601313	1.72309	1.96232	2.47615	0.579912	0.575176	0.556531	1.65868	1.69555	1.67817	0.517582	0.498401	0.488737	0.850351	0.852127	0.906441
						15	0.727958	0.691056	0.690211	2.59692	2.67582	2.74504	0.681415	0.696692	0.605089	1.72817	1.97711	2.49501	0.583355	0.583535	0.567352	1.64714	1.70348	1.68999	0.529184	0.502745	0.488015	0.849467	0.853553	0.906608
						15.33	0.732864	0.693735	0.6941	2.59603	2.67533	2.74886	0.692281	0.709205	0.606495	1.73004	1.97316	2.27988	0.585884	0.574928	0.567178	1.65715	1.70385	1.71227	0.523927	0.506541	0.486666	0.861627	0.856811	0.899763
						15.67	0.736125	0.706477	0.704067	2.61859	2.67364	2.76	0.70098	0.712138	0.610742	1.73698	1.97604	2.28376	0.5936	0.587751	0.574748	1.65018	1.72514	1.69438	0.525066	0.509279	0.485473	0.867993	0.866095	0.877244
						16	0.746934	0.716811	0.707541	2.63132	2.68973	2.77218	0.705904	0.7219	0.620204	1.74936	1.9832	2.28455	0.599678	0.578143	0.580311	1.68436	1.72225	1.72586	0.550844	0.523591	0.503871	0.862273	0.858727	0.902603
						16.33	0.745729	0.722619	0.709991	2.63691	2.69736	2.76621	0.715076	0.729757	0.627025	1.74228	1.99257	2.29976	0.604826	0.585135	0.589863	1.68573	1.72505	1.72732	0.542765	0.524987	0.502386	0.86742	0.873866	0.888002
						16.67	0.757263	0.724216	0.720234	2.62021	2.70541	2.77528	0.722759	0.738437	0.642636	1.74579	2.00186	2.30033	0.60956	0.597787	0.596519	1.66756	1.73453	1.72944	0.552735	0.527245	0.508779	0.864372	0.879145	0.882351
						17	0.76338	0.727343	0.718672	2.63219	2.70085	2.78111	0.727417	0.749432	0.656174	1.75152	2.00429	2.32528	0.621609	0.606045	0.59793	1.66686	1.75331	1.75111	0.55205	0.538564	0.516609	0.860661	0.875847	0.899561
						17.33	0.772355	0.740058	0.730336	2.64222	2.70064	2.78944	0.742772	0.756559	0.643952	1.75756	2.01421	2.32431	0.623437	0.613887	0.602106	1.67819	1.73861	1.7313	0.562476	0.540826	0.508569	0.871274	0.876614	0.925188
						17.67	0.780578	0.74049	0.734047	2.63561	2.72405	2.80818	0.747558	0.766336	0.667194	1.75907	2.0168	2.33794	0.630326	0.614565	0.609223	1.68768	1.74943	1.74475	0.569009	0.555984	0.528024	0.864938	0.869002	0.85995
						18	0.783917	0.751244	0.737082	2.64687	2.71996	2.80736	0.74879	0.77611	0.657301	1.76764	2.0269	2.3316	0.633644	0.622077	0.608727	1.6956	1.75668	1.74479	0.588212	0.553853	0.538868	0.865999	0.871153	0.901833
						18.33	0.790933	0.755141	0.744667	2.65069	2.73157	2.81327	0.763597	0.781789	0.6643	1.76353	2.02248	2.35294	0.641603	0.611026	0.622262	1.70705	1.75783	1.76376	0.586964	0.566726	0.534453	0.877636	0.877689	0.868169
						18.67	0.797336	0.762865	0.752025	2.65563	2.72682	2.8128	0.769712	0.795113	0.676814	1.7755	2.04298	2.35536	0.647408	0.624723	0.626415	1.70536	1.77054	1.76801	0.606978	0.571198	0.546477	0.874302	0.878576	0.894494
						19	0.806418	0.767957	0.76314	2.67913	2.73087	2.83274	0.778768	0.801807	0.697114	1.7809	2.03515	2.34288	0.644243	0.636244	0.626936	1.71792	1.76664	1.76362	0.595749	0.578552	0.553763	0.867653	0.881936	0.916533
						19.33	0.81153	0.76665	0.755147	2.67052	2.73538	2.81456	0.784288	0.812266	0.704712	1.78354	2.0531	2.37006	0.655295	0.637109	0.636179	1.717	1.77824	1.77742	0.60209	0.579569	0.556471	0.875084	0.878295	0.934896
						19.67	0.817961	0.779566	0.771981	2.69553	2.76904	2.8314	0.797583	0.822389	0.709821	1.80043	2.05213	2.37465	0.662938	0.644838	0.634608	1.73574	1.78575	1.78671	0.614528	0.592357	0.56029	0.888148	0.880716	0.879579
						20	0.828153	0.785236	0.779232	2.68101	2.76369	2.8346	0.80525	0.83172	0.701751	1.79715	2.05024	2.36607	0.665012	0.640313	0.638114	1.7271	1.79581	1.78036	0.612308	0.593981	0.557228	0.88633	0.894784	0.866065
						20.33	0.833241	0.790385	0.787397	2.6839	2.77539	2.84487	0.810021	0.842571	0.713874	1.80184	2.06643	2.36671	0.666268	0.648165	0.6484	1.73571	1.79198	1.80723	0.618664	0.600016	0.577602	0.887886	0.885509	0.925548
						20.67	0.839944	0.795369	0.796079	2.69376	2.76792	2.84714	0.824773	0.848912	0.716747	1.79424	2.05983	2.37271	0.677558	0.66637	0.656353	1.80494	1.78936	1.80924	0.632664	0.604797	0.580779	0.869429	0.87124	0.920105
						21	0.84689	0.810889	0.790485	2.70059	2.76553	2.82912	0.829712	0.85406	0.731016	1.8109	2.06936	2.39065	0.67577	0.65628	0.655526	1.73433	1.79382	1.79882	0.633338	0.605276	0.583445	0.882001	0.879306	0.860374
						21.33	0.852712	0.810126	0.788765	2.70621	2.75134	2.83683	0.840737	0.866279	0.746176	1.81391	2.06366	2.37906	0.684505	0.670541	0.661907	1.73991	1.81512	1.80787	0.648757	0.61699	0.595606	0.883063	0.878819	0.904575
						21.67	0.858293	0.814956	0.81035	2.70396	2.776	2.84259	0.843537	0.874501	0.760827	1.82225	2.08829	2.41851	0.693782	0.691595	0.678671	1.73413	1.81339	1.82387	0.646758	0.630355	0.592793	0.893378	0.870326	0.927903
						22	0.867906	0.820532	0.81657	2.71727	2.79096	2.86414	0.858136	0.883217	0.772677	1.82202	2.09837	2.40649	0.690821	0.67353	0.680805	1.76809	1.82241	1.84976	0.644198	0.621072	0.604814	0.88128	0.88048	0.893697
						22.33	0.876371	0.831048	0.822651	2.7123	2.78985	2.86747	0.865075	0.899403	0.765542	1.83133	2.08729	2.40266	0.706937	0.687235	0.680474	1.74747	1.81058	1.82359	0.658051	0.634685	0.615937	0.881051	0.878155	0.921618
						22.67	0.877635	0.833437	0.827571	2.71338	2.78861	2.87765	0.873999	0.899464	0.775222	1.83175	2.09517	2.40467	0.705274	0.690584	0.689301	1.75046	1.83266	1.82552	0.654756	0.642494	0.600766	0.891788	0.883751	0.885001
						23	0.888622	0.841523	0.831047	2.74314	2.7957	2.88905	0.8869	0.910848	0.778698	1.83252	2.08759	2.41167	0.734235	0.703564	0.695041	1.78136	1.81423	1.8335	0.652864	0.638608	0.608272	0.887496	0.890579	0.934517
						23.33	0.903145	0.852497	0.836545	2.72715	2.80294	2.87109	0.892763	0.919299	0.789935	1.83192	2.09833	2.42366	0.721294	0.71524	0.704393	1.77362	1.82102	1.84044	0.691113	0.657562	0.628139	0.890332	0.894851	0.940932
						23.67	0.900563	0.857098	0.846641	2.73547	2.79338	2.87584	0.897518	0.930661	0.788239	1.83412	2.11273	2.41444	0.725626	0.707238	0.708839	1.76882	1.82228	1.81758	0.693325	0.654798	0.637112	0.888851	0.892775	0.912252
						24	0.915038	0.865008	0.853575	2.73696	2.79705	2.88065	0.905276	0.936396	0.810195	1.84634	2.11944	2.43448	0.729642	0.710288	0.714559	1.77757	1.81249	1.84309	0.675385	0.656266	0.634372	0.902818	0.897006	0.863623
						24.33	0.917666	0.870518	0.858884	2.74623	2.81006	2.88419	0.918607	0.943813	0.829846	1.8546	2.13404	2.44286	0.741004	0.716098	0.719246	1.78093	1.83763	1.86558	0.672121	0.666581	0.628503	0.895509	0.88595	0.888736
						24.67	0.930123	0.872016	0.860221	2.75364	2.78171	2.89337	0.921221	0.960589	0.825336	1.84923	2.12205	2.43066	0.747101	0.722839	0.725088	1.78396	1.81942	1.88718	0.688151	0.662197	0.643005	0.896451	0.881955	0.929172
						25	0.936641	0.875906	0.869281	2.74927	2.82894	2.89577	0.931378	0.965393	0.852003	1.85826	2.11623	2.45609	0.751825	0.732065	0.728784	1.79338	1.83184	1.8791	0.683031	0.674288	0.666367	0.892519	0.892552	0.940348
						25.33	0.940873	0.892986	0.876728	2.7499	2.83857	2.90784	0.94089	0.970396	0.847707	1.86335	2.1298	2.45654	0.756487	0.727224	0.72831	1.7982	1.85345	1.85974	0.686604	0.676288	0.651918	0.892502	0.879362	0.929286
						25.67	0.94603	0.89259	0.882998	2.76459	2.82456	2.9039	0.946725	0.973757	0.842928	1.8688	2.14413	2.4546	0.773347	0.746948	0.73747	1.79192	1.85244	1.86873	0.719745	0.684675	0.658139	0.899227	0.900516	0.9115
						26	0.954957	0.900384	0.893215	2.76155	2.84165	2.90662	0.956817	0.994661	0.853679	1.87197	2.1303	2.45747	0.770839	0.648914	0.7507	1.78957	1.84062	1.85477	0.690785	0.679264	0.655179	0.895226	0.897548	1.07262
						26.33	0.96264	0.904807	0.899472	2.76965	2.82305	2.91713	0.968728	1.00623	0.874228	1.87561	2.14511	2.46592	0.774602	0.749163	0.753771	1.80251	1.83992	1.8749	0.717358	0.687894	0.673407	0.89914	0.899816	0.951381
						26.67	0.973921	0.912015	0.899178	2.74959	2.84561	2.91737	0.972972	1.01498	0.867479	1.88111	2.14919	2.4565	0.774427	0.757933	0.753356	1.79842	1.84492	1.87327	0.701384	0.692434	0.66689	0.914169	0.901274	0.950469
						27	0.982906	0.920695	0.909062	2.77657	2.84525	2.92315	0.981153	1.02256	0.888552	1.89038	2.15317	2.47662	0.778379	0.773671	0.757632	1.78079	1.8464	1.84115	0.704504	0.693404	0.666753	0.903637	0.888163	0.893568
						27.33	0.988484	0.933437	0.912575	2.75998	2.8327	2.91067	0.991272	1.02459	0.896511	1.8957	2.16486	2.49254	0.784612	0.774007	0.760638	1.79087	1.83255	1.87105	0.732909	0.710478	0.686266	0.900562	0.888812	0.930712
						27.67	0.995099	0.933164	0.92376	2.79264	2.84615	2.92464	0.99996	1.03453	0.890765	1.88519	2.16209	2.49334	0.791419	0.777074	0.765761	1.80666	1.86267	1.90235	0.709051	0.703409	0.68164	0.896152	0.880291	0.936715
						28	0.994838	0.9348	0.92644	2.7822	2.85445	2.93028	1.00347	1.04696	0.914546	1.89548	2.1722	2.49535	0.80091	0.786497	0.782446	1.81031	1.866	1.852	0.714435	0.713487	0.688826	0.908253	0.886413	0.942386
						28.33	1.00751	0.941665	0.935186	2.78642	2.8524	2.93018	1.0116	1.05052	0.913797	1.89025	2.1715	2.49795	0.809026	0.784658	0.783593	1.81245	1.84889	1.87461	0.718515	0.708111	0.685408	0.899422	0.884915	0.898517
						28.67	1.01998	0.951788	0.937781	2.78968	2.85358	2.93967	1.02522	1.06538	0.917316	1.8995	2.1798	2.49251	0.808873	0.801654	0.785271	1.80159	1.85949	1.86676	0.74337	0.718043	0.700659	0.904041	0.87347	0.925016
						29	1.01904	0.959793	0.948585	2.7937	2.84921	2.95256	1.03203	1.06473	0.927139	1.90831	2.17804	2.49887	0.813011	0.790586	0.786918	1.81189	1.86271	1.89642	0.72904	0.717159	0.692306	0.895594	0.886921	0.918393
						29.33	1.0264	0.958349	0.951941	2.7885	2.87082	2.95142	1.04234	1.07249	0.947015	1.90889	2.18056	2.51067	0.817222	0.799964	0.796441	1.83081	1.88035	1.88713	0.743813	0.720375	0.711084	0.901736	0.886541	0.949902
						29.67	1.04036	0.973833	0.96691	2.78832	2.88692	2.95295	1.04853	1.09017	0.952912	1.91549	2.19014	2.50192	0.821844	0.798244	0.793752	1.82131	1.86446	1.87187	0.733577	0.719907	0.700843	0.903741	0.877284	0.935181
						30	1.03957	0.978968	0.959899	2.79988	2.86431	2.96268	1.05147	1.0926	0.961054	1.91775	2.19304	2.51827	0.83226	0.797195	0.804735	1.80799	1.85929	1.89586	0.727659	0.732736	0.719741	0.903914	0.878966	0.927736
						30.33	1.04962	0.985256	0.973863	2.80718	2.88763	2.96402	1.06089	1.10511	0.965934	1.92272	2.19972	2.49879	0.837195	0.815143	0.82039	1.83426	1.87987	1.89677	0.735069	0.726346	0.713035	0.935217	0.887591	0.934534
						30.67	1.05774	0.984184	0.980414	2.80601	2.88364	2.96619	1.07021	1.10736	0.970974	1.91826	2.20397	2.54275	0.841142	0.829497	0.80628	1.81121	1.89696	1.89545	0.727448	0.726035	0.709287	0.915077	0.905305	0.913453
						31	1.06454	1.00055	0.983395	2.82047	2.88827	2.96029	1.07696	1.11392	0.969566	1.93466	2.18777	2.52637	0.850978	0.831167	0.815665	1.83206	1.89012	1.89294	0.733642	0.732084	0.71261	0.916569	0.90009	0.946224
						31.33	1.07157	1.00446	1.00043	2.81728	2.877	2.98098	1.08642	1.12776	1.01517	1.93673	2.21233	2.54508	0.844625	0.830474	0.824749	1.82464	1.91492	1.91119	0.74814	0.739038	0.729092	0.919344	0.901139	0.948959
						31.67	1.07613	1.01374	1.00373	2.83084	2.88603	2.9884	1.08929	1.1299	0.992193	1.9245	2.21196	2.54883	0.851413	0.839739	0.826954	1.83994	1.89716	1.89994	0.743966	0.740354	0.72626	0.904361	0.884665	0.978837
						32	1.08292	1.01175	1.00815	2.81968	2.89705	2.97787	1.10024	1.14017	1.04029	1.93164	2.2221	2.5443	0.860496	0.841217	0.838501	1.83537	1.90554	1.91057	0.73799	0.738349	0.713946	0.911697	0.90525	0.939743
						32.33	1.08995	1.02083	1.00734	2.83083	2.89597	2.98625	1.10401	1.1418	1.04702	1.94276	2.21011	2.54522	0.867122	0.849483	0.832131	1.83641	1.9014	1.90504	0.752997	0.739791	0.727672	0.936072	0.907217	0.941433
						32.67	1.10388	1.02632	1.01379	2.83926	2.90063	2.98075	1.11222	1.15788	1.08287	1.94893	2.22578	2.54142	0.865565	0.85622	0.844442	1.83023	1.86723	1.90097	0.746238	0.741918	0.731068	0.920576	0.891367	0.967027
						33	1.10306	1.027	1.0179	2.83647	2.88275	2.97797	1.12451	1.17236	1.07569	1.95211	2.22168	2.54768	0.87534	0.860155	0.850199	1.84066	1.8783	1.89611	0.748358	0.746268	0.736807	0.919521	0.90553	0.966658
						33.33	1.1065	1.03624	1.02761	2.83554	2.90855	2.98837	1.12789	1.17153	1.08718	1.95035	2.23502	2.5564	0.877038	0.857534	0.849696	1.83263	1.8893	1.8905	0.760807	0.75125	0.737763	0.922819	0.890564	0.942411
						33.67	1.11793	1.04957	1.03184	2.83479	2.9059	2.98129	1.13778	1.18254	1.09081	1.95542	2.23625	2.56941	0.884459	0.858213	0.854665	1.83035	1.89314	1.90564	0.767967	0.753946	0.733625	0.915323	0.887271	0.95411
						34	1.13374	1.04751	1.0434	2.84932	2.9179	2.99467	1.14126	1.19085	1.09978	1.96956	2.23234	2.58123	0.887814	0.865424	0.860675	1.84845	1.8912	1.90187	0.773258	0.757798	0.742871	0.934874	0.885566	0.944931
						34.33	1.13023	1.05139	1.0404	2.85359	2.90966	3.00297	1.15262	1.19227	1.10821	1.97623	2.23847	2.57715	0.885312	0.865501	0.867297	1.83243	1.8863	1.91148	0.780279	0.76044	0.743324	0.945454	0.903861	0.918012
						34.67	1.13955	1.06047	1.04736	2.84266	2.92497	3.00338	1.16078	1.20291	1.11292	1.98571	2.25789	2.56429	0.901988	0.878802	0.863838	1.83768	1.89971	1.90698	0.774218	0.753046	0.754546	0.927645	0.912886	0.941827
						35	1.14695	1.07553	1.06294	2.85016	2.91819	3.0143	1.1631	1.21196	1.13157	1.99461	2.24986	2.58278	0.900567	0.875392	0.87375	1.85274	1.87347	1.89584	0.766562	0.756924	0.746238	0.919642	0.896543	0.963859
						35.33	1.1548	1.07831	1.06023	2.85538	2.91693	3.01898	1.17385	1.21601	1.12863	1.97412	2.2517	2.60051	0.900937	0.870449	0.875896	1.85	1.89862	1.9332	0.753695	0.759998	0.745546	0.932616	0.90773	0.86919
						35.67	1.16521	1.087	1.06647	2.86426	2.90218	3.01039	1.18	1.23302	1.13688	1.98651	2.25976	2.58203	0.907941	0.878126	0.885739	1.86204	1.88236	1.90394	0.760481	0.772355	0.747749	0.947142	0.923872	0.957299
						36	1.16959	1.1007	1.08411	2.87702	2.94437	3.01724	1.18862	1.23385	1.1445	1.98482	2.24779	2.59922	0.908427	0.889188	0.886173	1.8584	1.89277	1.92592	0.768381	0.761717	0.752927	0.924826	0.920248	0.968708
						36.33	1.17876	1.09134	1.07767	2.87313	2.92449	3.01259	1.19228	1.24078	1.15695	2.00122	2.28141	2.60604	0.923625	0.897153	0.89448	1.86047	1.90993	1.91982	0.78784	0.765661	0.753275	0.932885	0.908006	0.951807
						36.67	1.18451	1.10755	1.09471	2.86959	2.92011	3.02412	1.19886	1.2465	1.1633	1.99103	2.27248	2.60995	0.925555	0.891123	0.892511	1.872	1.90006	1.9288	0.785249	0.769603	0.76498	0.931433	0.885545	0.961625
						37	1.18631	1.10966	1.08747	2.87292	2.91739	3.02089	1.21182	1.26135	1.16092	1.99408	2.27989	2.59451	0.928981	0.901672	0.895898	1.85738	1.89791	1.94571	0.765787	0.769467	0.757122	0.927261	0.91013	0.978295
						37.33	1.19229	1.11388	1.09193	2.88092	2.94345	3.04056	1.20767	1.26351	1.15876	1.99334	2.27165	2.60183	0.92434	0.904778	0.906487	1.88265	1.90405	1.94159	0.762659	0.770186	0.764472	0.911275	0.910762	0.955547
						37.67	1.20371	1.11909	1.10138	2.88656	2.94517	3.0415	1.21508	1.26688	1.15761	1.99801	2.29	2.60635	0.938419	0.911272	0.903595	1.89559	1.90237	1.94462	0.766635	0.772525	0.755658	0.939605	0.920654	0.93906
						38	1.20925	1.13027	1.11047	2.8712	2.95362	3.01837	1.22307	1.27594	1.17759	2.01243	2.28686	2.61719	0.94296	0.927671	0.912889	1.86926	1.89827	1.94763	0.784233	0.779809	0.774611	0.92992	0.925999	0.970118
						38.33	1.21245	1.1307	1.10745	2.8616	2.9451	3.02629	1.22643	1.28393	1.17961	2.00313	2.28774	2.61631	0.942552	0.92395	0.922447	1.87675	1.90441	1.92975	0.772679	0.770368	0.767966	0.927171	0.912242	0.989266
						38.67	1.21796	1.13529	1.11886	2.87104	2.96674	3.03548	1.24096	1.29339	1.19131	2.02124	2.28797	2.62776	0.951287	0.918993	0.921823	1.88762	1.90228	1.92885	0.785876	0.776975	0.770107	0.917125	0.893292	0.975326
						39	1.23106	1.13822	1.12071	2.88362	2.9498	3.04851	1.23978	1.30568	1.17923	2.02021	2.29139	2.62532	0.949995	0.929408	0.92108	1.85024	1.95882	1.92057	0.772674	0.776892	0.763156	0.935037	0.899612	0.973176
						39.33	1.23984	1.14612	1.12967	2.88692	2.9642	3.05172	1.25204	1.30386	1.21822	2.01998	2.30217	2.65075	0.950075	0.933303	0.934018	1.86138	1.93611	1.92739	0.783143	0.77454	0.764636	0.918734	0.914284	0.993859
						39.67	1.22878	1.15418	1.13397	2.89301	2.9367	3.03244	1.25611	1.31165	1.19196	2.03152	2.30389	2.65473	0.962495	0.933218	0.921884	1.89184	1.93781	1.9403	0.782439	0.777208	0.777637	0.941232	0.921068	0.981126
						40	1.24734	1.16846	1.14105	2.90492	2.9645	3.06274	1.26779	1.31101	1.19045	2.02923	2.29928	2.68605	0.962109	0.932284	0.931321	1.84865	1.95453	1.93332	0.782385	0.781291	0.768373	0.968291	0.909107	0.976476
						40.33	1.2472	1.16763	1.1428	2.8877	2.97098	3.05006	1.27686	1.32986	1.21082	2.02952	2.30908	2.66724	0.974923	0.931845	0.934501	1.86135	1.95064	1.9282	0.77964	0.783914	0.778425	0.940776	0.931976	0.99973
						40.67	1.26131	1.18009	1.16036	2.89582	2.97056	3.05837	1.27585	1.34563	1.2279	2.03472	2.31254	2.76479	0.95543	0.940483	0.945691	1.9009	1.91695	1.92502	0.787873	0.790233	0.776756	0.923832	0.910702	0.971185
						41	1.2624	1.17821	1.15875	2.87828	2.9558	3.04535	1.2851	1.33992	1.23617	2.04462	2.30686	2.76845	0.982602	0.949301	0.94673	1.86931	1.91214	1.92168	0.805518	0.788517	0.78153	0.931711	0.91379	0.939092
						41.33	1.27519	1.18902	1.15334	2.89566	2.97376	3.0749	1.29118	1.33769	1.25036	2.04073	2.32715	2.70801	0.979459	0.944731	0.951772	1.88122	1.90709	1.92522	0.784878	0.781987	0.771886	0.932234	0.908866	0.97492
						41.67	1.28045	1.19654	1.17613	2.90619	2.97938	3.05889	1.29114	1.34823	1.2337	2.02725	2.31482	2.63343	0.977126	0.95718	0.955914	1.88901	1.92218	1.92169	0.79125	0.786489	0.784177	0.897708	0.942624	0.996291
						42	1.27828	1.19349	1.17755	2.91401	2.97181	3.08336	1.30079	1.35344	1.25958	2.04961	2.31977	2.64593	0.990582	0.960532	0.964773	1.88482	1.94554	1.93052	0.799759	0.786931	0.77999	0.944249	0.925621	0.987696
						42.33	1.29054	1.20242	1.17837	2.89907	2.98212	3.07184	1.3131	1.36069	1.23824	2.04399	2.32562	2.6491	0.9951	0.957649	0.959194	1.87994	1.89268	1.94008	0.791816	0.787373	0.784935	0.940521	0.946078	0.957645
						42.67	1.29495	1.21356	1.19033	2.90177	2.9752	3.08743	1.31844	1.37164	1.26657	2.05342	2.32351	2.64695	0.991797	0.974301	0.966828	1.88524	1.93544	1.91719	0.791794	0.788436	0.780416	0.922187	0.94994	0.925834
						43	1.29826	1.21918	1.19306	2.92721	2.98191	3.08226	1.31487	1.37824	1.26392	2.05024	2.33412	2.64958	1.00228	0.955463	0.974213	1.86906	1.9203	1.91312	0.787496	0.776773	0.777475	0.947818	0.937249	0.951554
						43.33	1.30683	1.2263	1.191	2.92326	2.98024	3.08529	1.32957	1.37531	1.2704	2.05607	2.33537	2.64621	0.990706	0.968408	0.976358	1.8944	1.95041	1.93135	0.799941	0.789317	0.784676	0.929121	0.938142	1.03742
						43.67	1.3153	1.22662	1.21057	2.91526	3.01468	3.07899	1.33004	1.38401	1.27783	2.05865	2.34852	2.65154	1.01171	0.976653	0.976182	1.92586	2.01776	1.93484	0.801446	0.783873	0.796069	0.940125	0.953694	0.958695
						44	1.32099	1.23247	1.19502	2.92803	2.99181	3.08899	1.33658	1.3859	1.28502	2.06301	2.33126	2.67329	1.00828	0.990554	0.970993	1.88839	1.91897	1.93227	0.816409	0.797097	0.79094	0.96168	0.900895	0.958835
						44.33	1.3249	1.23833	1.21391	2.94559	2.98241	3.08222	1.34357	1.39254	1.29322	2.05899	2.33832	2.66566	1.00954	0.975785	0.987888	1.91164	1.97509	1.96386	0.804696	0.798435	0.799102	0.949223	0.928135	0.93906
						44.67	1.33463	1.24231	1.21389	2.92509	2.9984	3.08456	1.34998	1.39371	1.31089	2.06006	2.3479	2.75658	1.03935	0.976794	0.988742	1.894	1.95496	1.9603	0.817402	0.797926	0.797838	0.9623	0.927231	0.975916
						45	1.34251	1.24651	1.22482	2.92939	3.00327	3.09456	1.35827	1.3983	1.29196	2.06035	2.33619	2.75679	1.01698	0.99957	0.996239	1.90031	1.99628	1.96472	0.796968	0.793283	0.792145	0.938954	0.926769	0.97489
						45.33	1.34584	1.24984	1.22947	2.91753	3.00207	3.09113	1.36612	1.41048	1.31132	2.0769	2.34808	2.75397	1.02501	1.00421	0.994782	1.91273	2.02054	1.95268	0.81713	0.801563	0.796583	0.894616	0.938768	0.931809
						45.67	1.34758	1.26041	1.23478	2.94657	3.00053	3.10382	1.36518	1.4188	1.3112	2.08047	2.34684	2.77967	1.03279	0.966424	1.00229	1.88881	1.98796	1.95904	0.80766	0.791302	0.804914	0.953906	0.926441	0.951456
						46	1.35587	1.2629	1.24904	2.93956	3.00972	3.0942	1.37389	1.42554	1.31709	2.07706	2.3512	2.71111	1.03199	1.00028	0.998671	1.89658	2.01769	1.94966	0.810622	0.789998	0.791915	0.920664	0.951014	0.965169
						46.33	1.36787	1.2645	1.24428	2.94406	3.01117	3.10771	1.3845	1.43021	1.34133	2.08125	2.36364	2.79721	1.02919	1.00549	1.00262	1.86411	2.0228	1.94539	0.805594	0.798944	0.791206	0.935735	0.908193	0.966679
						46.67	1.37073	1.27597	1.25216	2.94504	3.01037	3.09986	1.37938	1.44458	1.34503	2.08606	2.3568	2.67692	1.02181	0.974383	1.03364	1.95075	2.10405	1.98942	0.806983	0.798954	0.800922	0.941168	0.931511	0.968889
						47	1.37424	1.28215	1.25486	2.95373	3.02228	3.11712	1.39093	1.44345	1.32816	2.09023	2.36171	2.66141	1.06699	1.02567	1.02301	1.91249	2.00662	1.97728	0.812443	0.798498	0.806507	0.947282	0.92538	0.949076
						47.33	1.38781	1.28279	1.25789	2.94962	3.0247	3.10411	1.39734	1.44363	1.3327	2.07602	2.36445	2.69439	1.02641	1.01873	1.03337	1.92807	2.04594	1.96236	0.807149	0.800099	0.813214	0.92767	0.930843	0.996985
						47.67	1.38443	1.28618	1.27045	2.95939	3.0187	3.12155	1.40436	1.44831	1.35513	2.09288	2.36721	2.68986	1.01016	0.994366	1.02816	1.94035	2.03892	2.03398	0.818935	0.807514	0.805075	0.950678	0.943478	0.9759
						48	1.38544	1.29247	1.26762	2.95371	3.01843	3.11137	1.40789	1.45151	1.35079	2.09051	2.37842	2.68519	1.05252	0.97478	1.0175	1.89959	2.06254	1.98351	0.815406	0.803027	0.812254	0.925855	0.925653	0.991767
						48.33	1.39989	1.30276	1.27899	2.96686	3.01848	3.11154	1.40405	1.46537	1.38543	2.09401	2.36388	2.72866	1.05387	0.986442	1.02124	1.94238	2.10926	1.93875	0.818327	0.802862	0.803064	0.949391	0.920402	0.930143
						48.67	1.39891	1.30871	1.27947	2.96232	3.01577	3.11595	1.41567	1.47108	1.38644	2.10094	2.3865	2.70979	1.06073	0.979266	1.03073	1.9185	2.12586	1.99892	0.810507	0.802288	0.821276	0.949994	0.93247	1.01783
						49	1.40839	1.30826	1.28588	2.97525	3.02967	3.11252	1.42243	1.46733	1.38361	2.09824	2.39727	2.71224	1.0575	0.979046	1.03078	1.96317	2.1262	2.0092	0.81171	0.807157	0.807415	0.959993	0.918418	0.931853
						49.33	1.41292	1.31368	1.29678	2.97625	3.03054	3.11705	1.42105	1.4813	1.3815	2.10419	2.37524	2.68225	1.22344	0.984256	1.03105	1.93229	2.12627	2.07551	0.826197	0.81656	0.81082	0.931679	0.958659	0.929257
						49.67	1.42164	1.31937	1.28758	2.96038	3.01415	3.10472	1.43653	1.48596	1.38194	2.10533	2.38178	2.71922	1.135	0.988496	1.03219	1.87656	2.14391	2.08597	0.808772	0.811928	0.802316	0.962362	0.910303	0.958575
						50	1.4254	1.3329	1.30036	2.96703	3.04079	3.12105	1.43403	1.49068	1.39651	2.10074	2.392	2.72694	1.25753	1.0044	1.06327	1.95402	2.18314	2.04547	0.809702	0.811657	0.801212	0.933729	0.939351	1.00793
						50.33	1.42317	1.33874	1.31118	2.95098	3.04802	3.13037	1.44216	1.49258	1.39076	2.10575	2.39344	2.74938	1.18641	1.00178	1.04947	1.90648	2.14521	2.00434	0.813817	0.811242	0.799205	0.937592	0.926635	0.880233
						50.67	1.43968	1.3357	1.3115	2.96427	3.03062	3.13387	1.45081	1.50358	1.41535	2.10628	2.40602	2.72666	1.34024	0.995836	1.0486	1.90478	2.12947	2.07677	0.820919	0.816459	0.815636	0.946054	0.94729	0.986748
						51	1.4439	1.35071	1.31759	2.96721	3.0349	3.12771	1.45442	1.50198	1.38521	2.11177	2.39623	2.77268	1.33348	1.00391	1.04939	1.97045	2.15646	2.08324	0.819172	0.814735	0.815739	0.918002	0.898631	1.05128
						51.33	1.45153	1.35682	1.32099	2.97338	3.03565	3.14631	1.45841	1.50849	1.39741	2.11243	2.39961	2.76293	1.30084	0.9992	1.04582	1.89611	2.18347	2.05625	0.821353	0.82795	0.816078	0.941584	0.934945	0.93256
						51.67	1.45486	1.3694	1.33185	2.9821	3.03994	3.1396	1.46333	1.52073	1.42181	2.11916	2.40475	2.76234	1.25403	1.00664	1.05384	1.93782	2.13528	2.0931	0.810635	0.816732	0.806569	0.945315	0.958452	0.961629
						52	1.46111	1.36661	1.33306	2.97012	3.06113	3.14262	1.47219	1.52817	1.39661	2.11864	2.40713	2.77227	1.31686	1.01747	1.04813	1.95832	2.14196	1.97005	0.816372	0.820344	0.806856	0.979375	0.926997	0.993633
						52.33	1.46781	1.36364	1.333	2.98307	3.02403	3.12258	1.47533	1.5307	1.39224	2.12128	2.40044	2.7742	1.10645	1.02133	1.05461	1.91146	2.18634	2.03514	0.812232	0.81786	0.811181	1.0384	0.942459	1.01671
						52.67	1.47466	1.37046	1.34393	2.98832	3.05413	3.13713	1.48305	1.53922	1.40661	2.11956	2.41139	2.81545	1.10263	1.02559	1.06943	1.92016	2.15647	1.94815	0.82362	0.822059	0.818704	0.990331	0.995351	0.917386
						53	1.48385	1.37846	1.34658	2.98458	3.0482	3.14506	1.48408	1.5385	1.4057	2.12996	2.409	2.87689	1.10761	1.02174	1.06921	1.90055	2.1775	2.04183	0.826346	0.826227	0.813301	1.00556	0.887509	0.962797
						53.33	1.48622	1.37784	1.35026	3.00165	3.05093	3.1495	1.48721	1.55117	1.4173	2.1317	2.41488	2.87709	1.11142	1.03053	1.06826	1.95064	2.15438	2.09504	0.823896	0.826038	0.815214	1.01326	0.862571	0.970135
						53.67	1.48699	1.38574	1.35858	2.99585	3.04994	3.1416	1.49552	1.54676	1.41499	2.12737	2.41689	2.88849	1.11088	1.03597	1.07107	1.93913	2.1534	2.09345	0.822819	0.820016	0.812352	0.982879	1.07179	0.934267
						54	1.48555	1.38723	1.35352	2.9937	3.07363	3.15633	1.49235	1.55689	1.4295	2.13457	2.42037	2.90054	1.28384	1.0333	1.07994	1.95371	2.17234	2.07367	0.828515	0.825542	0.819125	0.980614	0.966875	1.26653
						54.33	1.49445	1.39251	1.36932	2.98269	3.06966	3.16415	1.49895	1.55428	1.42559	2.13439	2.42274	2.87126	1.34777	1.03134	1.07523	1.93756	2.19802	2.00707	0.824666	0.823433	0.81607	0.98186	0.910855	0.929079
						54.67	1.49763	1.39395	1.37187	2.99492	3.06325	3.16049	1.50936	1.56186	1.43813	2.14128	2.43407	2.81425	1.12952	1.05419	1.07251	1.95448	2.19365	1.9757	0.827074	0.825987	0.823653	1.00064	0.927579	0.992594
						55	1.50443	1.40411	1.37611	3.00708	3.07643	3.16304	1.5149	1.5677	1.43302	2.14016	2.42354	2.73382	1.14003	1.04091	1.0724	1.94211	2.21365	2.00635	0.826373	0.834275	0.819592	1.05316	0.942878	0.96803
						55.33	1.51616	1.41221	1.37551	3.00126	3.05885	3.14859	1.5248	1.57636	1.44225	2.14304	2.42282	2.74825	1.13223	1.049	1.08314	1.90805	2.20689	2.13391	0.825771	0.82615	0.823736	1.10015	0.930873	0.903523
						55.67	1.51868	1.42153	1.385	3.0151	3.06703	3.15928	1.51933	1.58653	1.44759	2.14638	2.45317	2.71089	1.13479	1.05021	1.09058	1.93164	2.20938	2.04458	0.831992	0.827159	0.815656	0.977214	0.96094	0.880617
						56	1.52254	1.4268	1.39649	3.00114	3.06854	3.16179	1.5209	1.59619	1.46198	2.14845	2.44521	2.69192	1.12207	1.04063	1.08044	1.9218	2.26396	2.11321	0.827803	0.813407	0.828822	0.942189	0.993995	0.924254
						56.33	1.53454	1.42369	1.38831	3.01641	3.06953	3.1786	1.5287	1.59425	1.46248	2.15093	2.43794	2.70341	1.13179	1.05881	1.09445	1.90536	2.25174	2.11507	0.822027	0.825294	0.827407	0.958398	0.983918	0.960141
						56.67	1.53254	1.43265	1.39671	2.99108	3.0871	3.1621	1.53179	1.60041	1.46056	2.16428	2.4374	2.73939	1.14069	1.05924	1.09173	1.91565	2.22327	2.11938	0.833476	0.833064	0.82571	1.00567	0.932023	1.0464
						57	1.53937	1.45015	1.4132	3.02357	3.09436	3.18318	1.52961	1.60838	1.47146	2.15462	2.45954	2.72701	1.31034	1.04583	1.09441	1.9925	2.25817	2.08734	0.826558	0.824391	0.827951	0.982092	0.933894	1.42936
						57.33	1.53576	1.4289	1.40306	2.99763	3.07629	3.1641	1.53321	1.60629	1.48157	2.15698	2.45272	2.68921	1.31033	1.05835	1.11133	1.92713	2.30312	2.05222	0.826414	0.82204	0.822407	0.974291	0.950979	0.949124
						57.67	1.54793	1.44813	1.41258	3.00764	3.07892	3.17195	1.54671	1.61875	1.4757	2.1678	2.43033	2.70656	1.16957	1.05938	1.11105	1.82512	2.39567	2.13253	0.824129	0.825512	0.821012	0.990385	0.987377	0.981883
						58	1.5595	1.45257	1.41495	3.01068	3.09698	3.19207	1.5565	1.61692	1.49905	2.17418	2.46314	2.75119	1.14151	1.05807	1.11088	1.93915	2.39485	2.14484	0.845351	0.820513	0.824439	1.00836	0.962742	0.683039
						58.33	1.56086	1.45384	1.41803	3.02181	3.08467	3.186	1.5536	1.61997	1.49399	2.15261	2.45143	2.71572	1.15953	1.05417	1.10471	1.96678	2.2398	2.05339	0.836824	0.829846	0.825566	0.910399	0.934381	0.833912
						58.67	1.56005	1.45944	1.42792	3.0188	3.10965	3.17919	1.56257	1.62574	1.49911	2.16089	2.46301	2.72142	1.14167	1.07729	1.11814	1.92508	2.16398	2.10454	0.831619	0.831117	0.821562	0.947486	0.956383	1.08757
						59	1.57842	1.46797	1.43015	3.03204	3.07738	3.19431	1.56048	1.63748	1.50129	2.16432	2.46692	2.70585	1.15229	1.07355	1.12422	1.9361	2.15138	2.10197	0.831388	0.828208	0.846734	0.947292	0.962747	1.01343
						59.33	1.57892	1.46413	1.42479	3.01874	3.0927	3.19239	1.56153	1.63635	1.50049	2.16729	2.45037	2.71974	1.15736	1.06285	1.11539	1.9997	2.07429	2.00271	0.825485	0.824727	0.814553	0.95149	0.870678	0.933243
						59.67	1.57705	1.4696	1.44401	3.01868	3.0927	3.19183	1.57101	1.6383	1.52472	2.15419	2.48845	2.70799	1.15559	1.08356	1.11642	2.00824	2.0719	2.06505	0.823579	0.827904	0.832889	0.993156	0.950498	0.915572
