# Supplementary material for: Real-time monitoring of peptidoglycan synthesis by membrane-reconstituted penicillin-binding proteins
Source: eLife journal article supplement (doi:10.7554/elife.61525), 2021-02-24
Supplement: supp [file Figure 3-figure supplement 2-source file.xlsx]

## Sheet: Fig3-figure supplement 2A
	Reaction I	Reaction II
0	0.448694	0.446389
0.33	0.467987	0.470908
0.67	0.485115	0.478057
1	0.512425	0.510341
1.33	0.537798	0.543008
1.67	0.570617	0.578039
2	0.596637	0.603529
2.33	0.61944	0.631649
2.67	0.647429	0.62869
3	0.678531	0.692085
3.33	0.714636	0.737877
3.67	0.744817	0.763515
4	0.772057	0.796534
4.33	0.808503	0.833649
4.67	0.837412	0.862507
5	0.866699	0.901299
5.33	0.901039	0.944179
5.67	0.923325	0.965611
6	0.956672	0.990105
6.33	0.987971	1.04667
6.67	1.01955	1.05672
7	1.05248	1.09037
7.33	1.075	1.0987
7.67	1.09896	1.14235
8	1.13173	1.17725
8.33	1.15265	1.17725
8.67	1.18104	1.25197
9	1.20697	1.29404
9.33	1.22959	1.30391
9.67	1.25872	1.32091
10	1.2841	1.32283
10.33	1.2948	1.38747
10.67	1.32297	1.41098
11	1.3377	1.43897
11.33	1.37197	1.42341
11.67	1.39105	1.48706
12	1.41511	1.50988
12.33	1.42759	1.53374
12.67	1.44642	1.54858
13	1.4728	1.57119
13.33	1.48193	1.59003
13.67	1.50214	1.60975
14	1.50951	1.63135
14.33	1.52541	1.64992
14.67	1.54595	1.66359
15	1.5534	1.7005
15.33	1.57393	1.70285
15.67	1.59206	1.71103
16	1.58929	1.72947
16.33	1.61971	1.73203
16.67	1.61617	1.75096
17	1.64029	1.75564
17.33	1.64996	1.76898
17.67	1.65228	1.77851
18	1.67235	1.7995
18.33	1.67923	1.8432
18.67	1.69355	1.80542
19	1.70888	1.8165
19.33	1.72252	1.82612
19.67	1.72508	1.83624
20	1.73409	1.83658
20.33	1.74569	1.84718
20.67	1.75498	1.86071
21	1.76988	1.86083
21.33	1.77632	1.85831
21.67	1.78339	1.87513
22	1.79144	1.87861
22.33	1.79039	1.87742
22.67	1.79096	1.87478
23	1.80089	1.87902
23.33	1.81596	1.90137
23.67	1.82687	1.89165
24	1.82861	1.90845
24.33	1.83385	1.89915
24.67	1.84618	1.90769
25	1.85216	1.90262
25.33	1.85877	1.91199
25.67	1.86831	1.92026
26	1.85771	1.91242
26.33	1.87486	1.91601
26.67	1.87671	1.91459
27	1.88059	1.92142
27.33	1.88624	1.92548
27.67	1.89586	1.92819
28	1.90236	1.93205
28.33	1.90903	1.93032
28.67	1.90802	1.92799
29	1.92914	1.9268
29.33	1.93284	1.92534
29.67	1.92305	1.93749
30	1.93992	1.92769
30.33	1.93584	1.92941
30.67	1.94845	1.928
31	1.93666	1.92152
31.33	1.93561	1.93849
31.67	1.94893	1.92399
32	1.96203	1.94998
32.33	1.95145	1.93404
32.67	1.96907	1.93595
33	1.9618	1.92981
33.33	1.97773	1.92653
33.67	1.98037	1.94915
34	1.9839	1.94817
34.33	1.98314	1.92728
34.67	1.97786	1.9371
35	1.98683	1.93406
35.33	1.9852	1.92736
35.67	2.00828	1.92862
36	2.00784	1.93917
36.33	1.99234	1.93165
36.67	2.01508	1.91859
37	2.0165	1.92535
37.33	2.02364	1.92271
37.67	2.00247	1.92787
38	2.02801	1.91741
38.33	2.02022	1.92584
38.67	2.02298	1.93142
39	2.03243	1.9143
39.33	2.03649	1.92422
39.67	2.03366	1.92216
40	2.0254	1.91252
40.33	2.0415	1.92457
40.67	2.04231	1.91785
41	2.05281	1.9007
41.33	2.04536	1.91339
41.67	2.05417	1.92022
42	2.06201	1.90815
42.33	2.04925	1.91433
42.67	2.06443	1.90657
43	2.0629	1.92234
43.33	2.06315	1.90695
43.67	2.076	1.91485
44	2.07011	1.88954
44.33	2.08131	1.89518
44.67	2.06842	1.90456
45	2.06414	1.89622
45.33	2.08411	1.88924
45.67	2.09701	1.8913
46	2.07939	1.89628
46.33	2.07908	1.88529
46.67	2.08674	1.88724
47	2.0906	1.88125
47.33	2.09094	1.88217
47.67	2.09461	1.88058
48	2.08695	1.88321
48.33	2.08442	1.87817
48.67	2.09399	1.88472
49	2.0988	1.8681
49.33	2.11728	1.87399
49.67	2.102	1.872
50	2.10723	1.84757
50.33	2.10491	1.86928
50.67	2.11187	1.87509
51	2.13191	1.8632
51.33	2.10844	1.85607
51.67	2.11558	1.85185
52	2.12329	1.84898
52.33	2.11949	1.86963
52.67	2.12408	1.85465
53	2.1168	1.84454
53.33	2.12276	1.8396
53.67	2.12441	1.84401
54	2.12552	1.82597
54.33	2.12496	1.8371
54.67	2.12556	1.85789
55	2.13621	1.84853
55.33	2.12991	1.82133
55.67	2.1377	1.83235
56	2.14689	1.83222
56.33	2.14221	1.84193
56.67	2.14767	1.8167
57	2.14527	1.81741
57.33	2.14215	1.83886
57.67	2.14588	1.80731
58	2.14566	1.80962
58.33	2.13825	1.81194
58.67	2.1503	1.79424
59	2.14721	1.78783
59.33	2.1391	1.80195
59.67	2.15202	1.77373
60	2.15365	1.7929
60.33	2.15938	1.77659
60.67	2.15038	1.77963
61	2.15433	1.78271
61.33	2.14964	1.77254
61.67	2.15307	1.7578
62	2.14302	1.73741
62.33	2.15418	1.78028
62.67	2.15542	1.72474
63	2.15317	1.75198
63.33	2.14962	1.73536
63.67	2.16578	1.64812
64	2.17158	1.75953
64.33	2.15858	1.6653
64.67	2.16963	1.69347
65	2.1529	1.56869
65.33	2.17165	1.68012
65.67	2.16366	1.8748
66	2.15902	1.61253
66.33	2.17206	1.68538
66.67	2.16213	1.58007
67	2.18123	1.6111
67.33	2.16507	1.64673
67.67	2.17722	1.62041
68	2.17296	1.62158
68.33	2.18216	1.79882
68.67	2.17606	1.60004
69	2.16432	1.65308
69.33	2.1785	1.57056
69.67	2.16865	1.56311
70	2.17272	1.59758
70.33	2.19161	1.71331
70.67	2.17776	1.71792
71	2.17216	2.12578
71.33	2.16279	1.29387
71.67	2.17992	1.52956
72	2.17697	1.62483
72.33	2.17684	1.55797
72.67	2.18367	1.51871
73	2.19505	1.60617
73.33	2.19786	1.58799
73.67	2.19067	1.55354
74	2.17564	1.59027
74.33	2.18583	1.51702
74.67	2.17722	1.51228
75	2.17959	1.56488
75.33	2.18448	1.49216
75.67	2.18612	1.59139
76	2.1888	1.51413
76.33	2.19426	1.53249
76.67	2.18686	1.54805
77	2.19233	1.50547
77.33	2.18764	1.50029
77.67	2.1968	1.44512
78	2.18596	1.48187
78.33	2.18495	1.52443
78.67	2.20878	1.42408
79	2.19761	1.52943
79.33	2.19931	1.51421
79.67	2.19632	1.85917
80	2.20102	1.46768
80.33	2.18488	1.54156
80.67	2.19481	1.75653
81	2.19604	1.49693
81.33	2.19183	1.52804
81.67	2.20368	1.48192
82	2.19468	1.46067
82.33	2.19599	1.4032
82.67	2.20078	1.56048
83	2.20126	1.66413
83.33	2.20665	1.45299
83.67	2.20779	1.48797
84	2.20757	1.64851
84.33	2.20932	1.84346
84.67	2.20612	1.72864
85	2.20747	1.80966
85.33	2.19959	1.67341
85.67	2.21048	1.49386
86	2.19961	1.47607
86.33	2.2107	1.42913
86.67	2.20078	1.41894
87	2.20906	1.39217
87.33	2.2035	1.43797
87.67	2.20752	1.88896
88	2.20435	1.46365
88.33	2.20855	1.17465
88.67	2.21352	1.39857
89	2.21108	2.11946
89.33	2.21672	1.42761
89.67	2.20791	1.4636
