# Supplementary material for: Real-time monitoring of peptidoglycan synthesis by membrane-reconstituted penicillin-binding proteins
Source: eLife journal article supplement (doi:10.7554/elife.61525), 2021-02-24
Supplement: supp [file Figure1-source file.xlsx]

## Sheet: Fig1 panel D
	FRET efficiency (%)	sE_ratioA
	avg	stdev	n	p-value (vs PBP1B)	p-value (vs +Amp)
PBP1B	28.5999	6.07912	5
Amp	10.5998	0.349098	3	0.00262338
Moe	0.235435	0.00525194	2	0.00041086	0.00464758

## Sheet: Fig1 panel E
time (min)	-	Only labelled	Amp	Moe	LpoB	LpoB/Amp	LpoB/Moe	LpoB/Only labelled
0	0.345597	0.338363	0.372088	0.363943	0.622413	0.517654	0.349521	0.369197
0.33	0.342155	0.329002	0.364119	0.365039	0.792949	0.588817	0.347285	0.373995
0.67	0.33965	0.342361	0.365933	0.363733	0.895823	0.59518	0.341267	0.394852
1	0.341532	0.339939	0.373779	0.353974	0.986554	0.618174	0.34904	0.39427
1.33	0.341855	0.33888	0.369962	0.363611	1.05822	0.647388	0.346849	0.406426
1.67	0.362165	0.334225	0.369056	0.368581	1.08603	0.622012	0.350407	0.41229
2	0.342466	0.342047	0.361113	0.355099	1.10092	0.661618	0.347121	0.425152
2.33	0.348411	0.340882	0.376083	0.362143	1.14579	0.659064	0.346243	0.438487
2.67	0.349305	0.339589	0.373271	0.367521	1.15494	0.6695	0.344539	0.455693
3	0.352279	0.33896	0.376408	0.367393	1.18666	0.658421	0.347326	0.465574
3.35	0.361861	0.340016	0.376405	0.36548	1.18476	0.67183	0.342752	0.477548
3.68	0.362045	0.337516	0.378829	0.366405	1.19797	0.720405	0.34807	0.482487
4.02	0.372001	0.341942	0.370731	0.358652	1.20127	0.681017	0.344919	0.485809
4.35	0.367131	0.340249	0.380869	0.364836	1.22578	0.680847	0.340247	0.496312
4.68	0.382031	0.340216	0.381209	0.366383	1.22433	0.68869	0.344327	0.496048
5.02	0.391111	0.334881	0.384452	0.362042	1.24288	0.6908	0.343249	0.502443
5.35	0.396022	0.333963	0.389872	0.363036	1.25488	0.698884	0.345211	0.513367
5.68	0.407604	0.340344	0.381522	0.367805	1.24832	0.68569	0.343161	0.519157
6.02	0.415915	0.333711	0.387505	0.365216	1.26062	0.700992	0.348868	0.528926
6.35	0.42955	0.342534	0.39046	0.370598	1.26274	0.683343	0.343294	0.53479
6.68	0.439329	0.333987	0.396626	0.367928	1.26708	0.698044	0.343362	0.540419
7.02	0.456694	0.339422	0.378309	0.36606	1.26423	0.696709	0.347075	0.544969
7.35	0.463689	0.331566	0.40799	0.368422	1.29738	0.687066	0.344363	0.558916
7.68	0.476634	0.338694	0.403228	0.363347	1.30161	0.703086	0.344922	0.55964
8.02	0.490567	0.340373	0.408251	0.366865	1.29777	0.708446	0.341831	0.574919
8.35	0.50842	0.340902	0.409264	0.363878	1.29552	0.697342	0.344233	0.57847
8.68	0.517683	0.343964	0.387095	0.365024	1.31595	0.702867	0.347537	0.589539
9.02	0.534226	0.331505	0.41727	0.359308	1.30395	0.692689	0.346545	0.592143
9.35	0.546421	0.342006	0.409286	0.366845	1.32536	0.699674	0.349864	0.597596
9.68	0.56777	0.334899	0.420645	0.360404	1.3335	0.707613	0.345217	0.605957
10.02	0.576845	0.336593	0.424229	0.364056	1.34226	0.70639	0.343597	0.611202
10.35	0.601967	0.341947	0.424157	0.367639	1.34743	0.699839	0.342845	0.619123
10.68	0.620768	0.335146	0.429772	0.366032	1.33314	0.694034	0.343321	0.619501
11.02	0.636865	0.337747	0.434429	0.361016	1.34993	0.701568	0.347131	0.625655
11.35	0.659795	0.343891	0.417054	0.364012	1.35748	0.708546	0.345889	0.627979
11.68	0.671829	0.33938	0.454668	0.365538	1.36435	0.693561	0.347424	0.63939
12.03	0.69259	0.343654	0.442496	0.362623	1.37104	0.707792	0.3413	0.646475
12.37	0.714539	0.344679	0.42693	0.36539	1.37837	0.70274	0.346374	0.646577
12.7	0.729524	0.342295	0.443827	0.362613	1.37085	0.717603	0.343004	0.652986
13.03	0.749131	0.340306	0.440402	0.361772	1.37191	0.705101	0.341504	0.660852
13.37	0.772966	0.342894	0.443932	0.365563	1.39332	0.708323	0.346736	0.671205
13.7	0.793029	0.341037	0.447742	0.365148	1.40947	0.719834	0.343275	0.669698
14.03	0.811604	0.343056	0.441304	0.365615	1.40041	0.706422	0.343073	0.669059
14.37	0.829159	0.343523	0.450414	0.364456	1.39925	0.709916	0.340535	0.680834
14.7	0.839743	0.342485	0.464927	0.364495	1.408	0.715163	0.343783	0.682285
15.03	0.854831	0.343076	0.469219	0.365745	1.40713	0.709115	0.34625	0.6818
15.37	0.866677	0.341554	0.471579	0.364361	1.39829	0.705888	0.345171	0.694565
15.7	0.888511	0.341701	0.469976	0.363801	1.41236	0.711809	0.345665	0.697014
16.03	0.904843	0.342737	0.467991	0.361783	1.42611	0.708656	0.345428	0.705427
16.37	0.922179	0.344269	0.468086	0.364495	1.42576	0.70602	0.343558	0.706657
16.7	0.931096	0.34461	0.488241	0.362754	1.41303	0.710286	0.344925	0.711251
17.03	0.940353	0.33866	0.474955	0.366175	1.40929	0.695397	0.349265	0.714435
17.37	0.959815	0.348122	0.477706	0.361018	1.42211	0.716646	0.352684	0.718113
17.7	0.979468	0.348148	0.484591	0.362173	1.44795	0.706479	0.354973	0.719603
18.03	0.988925	0.346563	0.483565	0.363582	1.42502	0.713394	0.361187	0.72729
18.37	1.00354	0.343254	0.495979	0.365339	1.4605	0.711729	0.357444	0.736373
18.7	1.01617	0.343926	0.501423	0.362993	1.45443	0.714108	0.363398	0.73919
19.03	1.02401	0.341487	0.489519	0.363993	1.46211	0.717796	0.354112	0.739973
19.37	1.03452	0.344821	0.481593	0.361655	1.4562	0.716653	0.36408	0.747652
19.7	1.04148	0.341621	0.483347	0.360111	1.47103	0.720963	0.365642	0.754101
20.03	1.05668	0.341651	0.476548	0.362823	1.45905	0.72182	0.359903	0.760835
20.37	1.06732	0.346112	0.513048	0.363896	1.46132	0.721668	0.355044	0.759201
20.7	1.09591	0.34198	0.487116	0.360512	1.48413	0.736301	0.359799	0.771836
21.03	1.0919	0.345821	0.501211	0.360175	1.48689	0.715936	0.364814	0.773398
21.37	1.10942	0.341895	0.477981	0.36461	1.47622	0.716367	0.359015	0.77402
21.7	1.11394	0.3442	0.501893	0.360321	1.48564	0.733944	0.356869	0.78042
22.03	1.12232	0.348679	0.515646	0.362548	1.47681	0.720767	0.348016	0.782618
22.37	1.12909	0.342271	0.497357	0.361058	1.48059	0.733045	0.356468	0.79523
22.7	1.14984	0.341716	0.523654	0.356306	1.48941	0.725441	0.353885	0.788854
23.03	1.15272	0.341935	0.507927	0.363022	1.48694	0.720234	0.35211	0.794351
23.37	1.15125	0.345798	0.491903	0.359551	1.50937	0.730275	0.356245	0.798521
23.72	1.17623	0.343752	0.500012	0.365281	1.50133	0.723347	0.357302	0.803397
24.05	1.17175	0.343916	0.506866	0.367954	1.50451	0.728618	0.358287	0.812152
24.38	1.1986	0.348007	0.509127	0.361041	1.51141	0.731066	0.359155	0.810562
24.72	1.20347	0.345356	0.529373	0.363549	1.51235	0.721394	0.347182	0.817891
25.05	1.20659	0.34744	0.515505	0.363107	1.52474	0.723226	0.359902	0.816294
25.38	1.20583	0.342966	0.511132	0.360151	1.51695	0.723561	0.354606	0.82737
25.72	1.22033	0.347284	0.501176	0.363601	1.51483	0.696284	0.349118	0.829795
26.07	1.21808	0.344002	0.53607	0.360392	1.50809	0.691359	0.357265	0.834821
26.4	1.23543	0.341317	0.510179	0.358842	1.52921	0.750823	0.351159	0.836185
26.73	1.25272	0.340898	0.498689	0.363379	1.52352	0.725206	0.353577	0.841057
27.07	1.24669	0.347954	0.518944	0.364338	1.53306	0.701044	0.357035	0.843307
27.4	1.25913	0.346441	0.5126	0.361782	1.54212	0.703646	0.358707	0.843153
27.73	1.25621	0.342684	0.505124	0.362406	1.54185	0.728816	0.347713	0.856001
28.07	1.27625	0.349069	0.514993	0.361431	1.52745	0.713144	0.351141	0.857367
28.4	1.27555	0.343975	0.509541	0.360889	1.52406	0.735101	0.355052	0.862309
28.73	1.28318	0.341574	0.516884	0.36324	1.53429	0.724283	0.359493	0.86325
29.07	1.28589	0.343127	0.518915	0.36198	1.54302	0.730069	0.357992	0.866484
29.4	1.29933	0.342431	0.526358	0.36051	1.56259	0.728845	0.350838	0.866652
29.73	1.30934	0.345303	0.532889	0.365743	1.54036	0.710595	0.348774	0.876517
30.07	1.30644	0.346563	0.530186	0.357664	1.54992	0.735449	0.359724	0.873246
30.4	1.31159	0.345707	0.517185	0.36549	1.54175	0.718938	0.354675	0.891208
30.73	1.31555	0.343458	0.526299	0.364393	1.58086	0.726727	0.35479	0.883083
31.08	1.33553	0.344145	0.514022	0.361892	1.55848	0.726198	0.358901	0.896312
31.42	1.3242	0.34363	0.52939	0.362143	1.57667	0.7235	0.348722	0.895992
31.75	1.34733	0.349426	0.52548	0.364226	1.57295	0.715884	0.350882	0.899698
32.1	1.34439	0.340762	0.52892	0.360771	1.5793	0.735031	0.351945	0.902337
32.43	1.35044	0.345305	0.534508	0.363487	1.5808	0.716546	0.351315	0.898061
32.77	1.36067	0.344482	0.508245	0.359686	1.5773	0.711041	0.354731	0.902892
33.1	1.36014	0.345415	0.531871	0.361683	1.57969	0.744614	0.350571	0.909074
33.43	1.36247	0.346844	0.524973	0.359739	1.5783	0.741725	0.350231	0.913069
33.77	1.37124	0.346019	0.526783	0.359306	1.59626	0.702419	0.349441	0.917633
34.1	1.38654	0.344133	0.543202	0.363741	1.56856	0.712756	0.349137	0.919366
34.43	1.37249	0.345959	0.537866	0.362514	1.59198	0.738241	0.355219	0.926582
34.77	1.3846	0.34461	0.518932	0.366641	1.58989	0.682036	0.350226	0.926922
35.12	1.3917	0.348254	0.532898	0.36277	1.60636	0.709886	0.352842	0.927029
35.45	1.39671	0.348269	0.517176	0.361123	1.59615	0.710571	0.352409	0.936515
35.78	1.39573	0.349045	0.535176	0.36261	1.59882	0.680419	0.347425	0.933576
36.12	1.40394	0.345805	0.530184	0.358468	1.58922	0.754589	0.34942	0.949361
36.45	1.41713	0.345169	0.512821	0.364743	1.5925	0.750609	0.353823	0.941975
36.78	1.41407	0.346043	0.535739	0.360375	1.61284	0.730141	0.351344	0.950015
37.12	1.43123	0.349095	0.519617	0.363058	1.60278	0.665869	0.35233	0.954725
37.45	1.41751	0.346386	0.542192	0.36231	1.61533	0.74797	0.356232	0.961665
37.78	1.42423	0.345152	0.546366	0.359734	1.58911	0.715196	0.350375	0.961279
38.12	1.42728	0.344504	0.548836	0.360246	1.60138	0.710418	0.353193	0.971757
38.45	1.42999	0.343902	0.526939	0.362736	1.62812	0.727732	0.349604	0.973397
38.78	1.43976	0.346379	0.513888	0.363698	1.60844	0.733306	0.345901	0.977527
39.12	1.43113	0.343234	0.546369	0.362532	1.61242	0.765105	0.352131	0.977584
39.45	1.43575	0.344636	0.547049	0.359378	1.6045	0.699101	0.347683	0.978552
39.78	1.44072	0.341534	0.541745	0.359562	1.61577	0.687772	0.35124	0.982367
40.12	1.44374	0.346312	0.510423	0.358747	1.63746	0.738762	0.351793	0.979023
40.45	1.46	0.34258	0.529455	0.361251	1.64146	0.727047	0.35676	0.994764
40.78	1.4513	0.347311	0.548011	0.36047	1.61801	0.734497	0.352119	0.994024
41.12	1.477	0.347965	0.556913	0.359739	1.62621	0.750857	0.359389	0.999729
41.45	1.46802	0.347594	0.539914	0.360563	1.62041	0.756983	0.349544	1.00198
41.78	1.4733	0.346628	0.557441	0.360118	1.62729	0.721369	0.35827	1.00203
42.13	1.48236	0.345621	0.559311	0.355686	1.62995	0.736166	0.347646	1.00567
42.47	1.47769	0.344317	0.56717	0.358911	1.63322	0.735979	0.345193	1.0114
42.8	1.47357	0.34702	0.584043	0.357027	1.64904	0.741254	0.354268	1.00827
43.13	1.48482	0.343661	0.530085	0.361706	1.64425	0.735982	0.345833	1.01165
43.47	1.48324	0.347314	0.538766	0.359847	1.64598	0.737568	0.348697	1.01902
43.8	1.48425	0.345872	0.535587	0.363588	1.64126	0.741163	0.34801	1.01708
44.13	1.49664	0.345342	0.541489	0.362505	1.65742	0.739736	0.346619	1.02429
44.48	1.50316	0.344446	0.517923	0.360641	1.6485	0.634058	0.347669	1.02796
44.82	1.49404	0.346521	0.552833	0.362462	1.65364	0.76773	0.348941	1.02688
45.15	1.49802	0.349486	0.545973	0.3615	1.66208	0.706401	0.349508	1.03327
45.48	1.50014	0.347877	0.593837	0.362813	1.64318	0.742572	0.336637	1.03717
45.82	1.50569	0.345148	0.580773	0.360046	1.65968	0.750161	0.351802	1.04426
46.15	1.52374	0.347577	0.557534	0.363081	1.65168	0.638373	0.352336	1.04474
46.48	1.50451	0.347671	0.595664	0.356087	1.65936	0.707706	0.355809	1.04377
46.82	1.52271	0.345598	0.576091	0.356842	1.62555	0.771946	0.354865	1.05737
47.15	1.51954	0.345926	0.551988	0.357826	1.65915	0.711879	0.339752	1.05842
47.48	1.53922	0.348414	0.577756	0.35838	1.65123	0.742655	0.33947	1.05621
47.82	1.53116	0.345412	0.562217	0.358107	1.64663	0.711131	0.357872	1.058
48.15	1.5196	0.34561	0.568462	0.361792	1.65349	0.79173	0.335162	1.0703
48.48	1.53038	0.345897	0.57049	0.355526	1.64444	0.738435	0.347569	1.0818
48.82	1.53471	0.347311	0.54148	0.357722	1.65775	0.743187	0.353016	1.07067
49.15	1.53752	0.347129	0.55702	0.358389	1.66575	0.727029	0.349771	1.07409
49.48	1.54829	0.345479	0.556768	0.358531	1.66377	0.822323	0.337034	1.08361
49.82	1.55086	0.348993	0.551477	0.356104	1.65795	0.722512	0.357029	1.07918
50.15	1.5381	0.346042	0.559581	0.358222	1.67363	0.744949	0.355047	1.08329
50.48	1.53955	0.345887	0.557687	0.359452	1.67077	0.694235	0.344759	1.09078
50.82	1.54507	0.344795	0.559656	0.354796	1.67873	0.767626	0.346522	1.09293
51.15	1.55083	0.346628	0.55711	0.356312	1.64816	0.748357	0.333557	1.09047
51.48	1.55844	0.347183	0.557924	0.358562	1.68002	0.81787	0.351727	1.10103
51.82	1.56033	0.347291	0.548213	0.35821	1.6846	0.7776	0.354873	1.09956
52.15	1.55125	0.348453	0.555956	0.354921	1.68131	0.70917	0.347489	1.10254
52.48	1.56649	0.347448	0.564906	0.356818	1.65605	0.748444	0.340788	1.10317
52.82	1.55815	0.350538	0.55641	0.356506	1.68741	0.723442	0.350117	1.11112
53.15	1.57216	0.346337	0.550819	0.356487	1.67634	0.792459	0.354725	1.11478
53.48	1.57356	0.346642	0.561411	0.354864	1.6473	0.754874	0.330714	1.11769
53.83	1.58667	0.348134	0.567514	0.358733	1.69519	0.755477	0.350584	1.1181
54.17	1.57835	0.347954	0.566606	0.359894	1.70853	0.77338	0.34827	1.12632
54.5	1.58275	0.348541	0.564608	0.354513	1.66948	0.740089	0.356777	1.13428
54.83	1.58937	0.350139	0.581264	0.356684	1.67604	0.750617	0.337771	1.12965
55.18	1.59561	0.347147	0.571861	0.349058	1.7223	0.740829	0.350812	1.15332
55.52	1.58643	0.34908	0.567932	0.358109	1.6817	0.787822	0.350734	1.13445
55.85	1.59534	0.346844	0.56672	0.356657	1.68552	0.787248	0.336234	1.12994
56.18	1.59152	0.347626	0.573188	0.358206	1.7041	0.752074	0.348827	1.13656
56.52	1.58538	0.349349	0.57304	0.359203	1.70482	0.669834	0.35231	1.13609
56.85	1.60204	0.345698	0.578695	0.355278	1.70364	0.82185	0.335347	1.14361
57.18	1.60254	0.351795	0.565166	0.353053	1.69179	0.773159	0.316777	1.1438
57.52	1.59507	0.348089	0.562485	0.355375	1.71245	0.806905	0.351823	1.15631
57.85	1.5929	0.350249	0.566804	0.358861	1.70635	0.889895	0.343166	1.15704
58.18	1.59689	0.348637	0.563855	0.352529	1.7185	0.744894	0.347775	1.15906
58.52	1.60611	0.34787	0.567404	0.35734	1.69111	0.746065	0.357248	1.16115
58.85	1.60314	0.344397	0.575472	0.357685	1.72697	0.75937	0.328085	1.15871
59.2	1.61124	0.349349	0.572498	0.356287	1.69325	0.720266	0.348752	1.17095
59.53	1.62177	0.345225	0.5671	0.359319	1.70952	0.878155	0.350599	1.17282
59.87	1.60743	0.349073	0.572005	0.355911	1.87473	0.831006	0.340206	1.17554

## Sheet: Fig1 panel F
Condition		Slopes (10 - 15 min)					relative to condition 1
n	descript.	repeat1	repeat2	repeat3	average	std. dev	average	std. dev
1	-	0.0518894	0.0425701	0.0590271	0.0511622	0.00825259	1	0.161303
2	Amp	0.00573079	0.006871		0.00630089	0.000806249	1	0.127958
Condition		Slopes (10 - 15 min)					relative to condition 1
n	descript.	repeat1	repeat2	repeat3	average	std. dev	average	std. dev
3	LpoB	0.640595	0.467172	0.450612	0.51946	0.105232	10.1532	2.05683
4	LpoB/Amp	0.143448	0.126561		0.135005	0.011941	21.4263	1.89513
