# Supplementary material for: Real-time monitoring of peptidoglycan synthesis by membrane-reconstituted penicillin-binding proteins
Source: eLife journal article supplement (doi:10.7554/elife.61525), 2021-02-24
Supplement: supp [file Figure2-source file.xlsx]

## Sheet: Fig2 panel A
		FRET efficiency (%)
		average	std. dev.	n	p-value (vs. unidgested)	p-value (vs. +Amp)
Undigested	PBP1B	28.4626	3.05969	3		0.00575062
	+Amp	11.0071	1.00976	3
MepM	PBP1B	16.6875	1.59245	5	0.0119148	0.000159274
	+Amp	9.48398	0.607518	3	0.103478
Cellosyl	PBP1B	0.630484	0.220155	5	0.0039128	0.650062
	+Amp	0.728677	0.296822	3	0.00167489

## Sheet: Fig2 panel E
tiem (min)	% peak 3	%(peak 2 + peak 3)	% peak 2	FI_donor/FI_acceptor
0	0	0	0	0.294711
5	0	15.6399	15.6399	0.306433
10	5.66902	49.3659	43.6969	0.363198
20	13.1519	76.0112	62.8593	0.569425
40	17.8389	80.9081	63.0692	0.945659
60	29.2541	88.566	59.312	1.16815
