# Supplementary material for: Real-time monitoring of peptidoglycan synthesis by membrane-reconstituted penicillin-binding proteins
Source: eLife journal article supplement (doi:10.7554/elife.61525), 2021-02-24
Supplement: supp [file Figure3-figure supplement 7-source file.xlsx]

## Sheet: Fig3-fig supp 6 panel A
time (min)	AbPBP1B	Amp	Moe	Only labelled	LpoP	LpoP/Amp	LpoP/Moe	LpoP/Only labelled
0	0.406968	0.403166	0.41949	0.417573	0.428116	0.424932	0.413434	0.424029
0.33	0.406497	0.414521	0.416419	0.425256	0.44013	0.439288	0.417909	0.435008
0.67	0.406603	0.407892	0.418104	0.429836	0.473946	0.463155	0.412776	0.432753
1	0.414727	0.415765	0.413289	0.425257	0.498367	0.464762	0.403472	0.442294
1.33	0.408232	0.417292	0.418115	0.41897	0.511925	0.499568	0.410715	0.44798
1.67	0.406535	0.415705	0.414504	0.420616	0.532584	0.505319	0.410561	0.447087
2	0.408014	0.415804	0.414629	0.422764	0.541089	0.511645	0.41524	0.4524
2.33	0.407971	0.418422	0.414031	0.421394	0.556265	0.528767	0.40355	0.461945
2.67	0.407496	0.41959	0.416966	0.42448	0.567081	0.530402	0.416024	0.457197
3	0.408788	0.416224	0.410004	0.424291	0.572489	0.525652	0.408407	0.462703
3.33	0.407343	0.418207	0.417245	0.422607	0.582243	0.540948	0.418704	0.467842
3.67	0.412778	0.417775	0.410911	0.424116	0.58488	0.545229	0.415598	0.472429
4	0.407068	0.414887	0.410558	0.422899	0.591891	0.553417	0.414525	0.477726
4.33	0.408678	0.421347	0.4199	0.424919	0.594822	0.549558	0.408876	0.482229
4.67	0.408589	0.41531	0.414491	0.425341	0.602698	0.567079	0.425258	0.483409
5	0.409506	0.412773	0.420137	0.429282	0.601335	0.556078	0.413578	0.484661
5.33	0.409278	0.412869	0.417026	0.424061	0.606553	0.557093	0.414025	0.492233
5.67	0.414466	0.4134	0.415416	0.418886	0.614422	0.553051	0.415244	0.500944
6	0.413293	0.416646	0.416428	0.420664	0.600437	0.564961	0.417961	0.502805
6.33	0.410498	0.417684	0.421778	0.420002	0.605445	0.569749	0.409655	0.505296
6.67	0.409649	0.4109	0.41748	0.418225	0.603568	0.556847	0.415151	0.505394
7	0.40499	0.41639	0.416037	0.424227	0.612935	0.565739	0.412367	0.510632
7.33	0.407489	0.413544	0.417839	0.423306	0.609404	0.552742	0.418778	0.514807
7.67	0.403138	0.415355	0.413284	0.416753	0.612404	0.564739	0.413239	0.511785
8	0.399179	0.408199	0.417804	0.415007	0.612353	0.552879	0.413198	0.518647
8.33	0.399613	0.413033	0.412786	0.412726	0.602387	0.56426	0.413086	0.516485
8.67	0.404396	0.412506	0.413667	0.417383	0.615413	0.573353	0.40761	0.521154
9	0.39958	0.409567	0.413379	0.41811	0.601947	0.564257	0.407195	0.527878
9.33	0.390662	0.407816	0.417846	0.411378	0.609801	0.567403	0.408561	0.534587
9.67	0.407481	0.410296	0.418511	0.411933	0.599908	0.567605	0.410307	0.547334
10	0.395349	0.40481	0.414066	0.40991	0.605412	0.555108	0.410065	0.534216
10.33	0.398728	0.400759	0.406434	0.41509	0.610852	0.560348	0.41223	0.536927
10.67	0.398914	0.402592	0.402096	0.410324	0.602889	0.557093	0.407842	0.538899
11	0.395725	0.405104	0.411942	0.407749	0.604575	0.55507	0.405226	0.542286
11.33	0.401131	0.406059	0.408611	0.412854	0.603264	0.555644	0.410452	0.552713
11.67	0.396399	0.405137	0.408552	0.407065	0.601436	0.560532	0.407742	0.547529
12	0.390936	0.405539	0.407642	0.404787	0.606454	0.547253	0.408052	0.538496
12.33	0.40667	0.40874	0.404107	0.405441	0.613654	0.552689	0.40545	0.548455
12.67	0.40258	0.405432	0.406102	0.406717	0.613748	0.557885	0.408223	0.553731
13	0.391398	0.404772	0.394723	0.405364	0.60633	0.560573	0.406922	0.552674
13.33	0.38473	0.401017	0.405931	0.401354	0.608889	0.547206	0.402139	0.549107
13.67	0.384115	0.400601	0.40065	0.398276	0.611963	0.563186	0.408868	0.552846
14	0.400616	0.397853	0.403496	0.405606	0.62447	0.563964	0.407023	0.560102
14.33	0.396332	0.401441	0.404136	0.396677	0.627364	0.572067	0.404911	0.554068
14.67	0.406428	0.402104	0.405062	0.402655	0.627879	0.554373	0.400013	0.561922
15	0.415519	0.405965	0.400281	0.40451	0.627554	0.557783	0.404376	0.556822
15.33	0.417811	0.409585	0.402699	0.401936	0.625498	0.560293	0.402602	0.569921
15.67	0.417893	0.401995	0.400893	0.402015	0.626033	0.572393	0.408484	0.583459
16	0.420114	0.407955	0.405243	0.412236	0.620979	0.571477	0.410604	0.571143
16.33	0.423867	0.414433	0.39921	0.405436	0.623955	0.564821	0.405035	0.577919
16.67	0.424222	0.418423	0.405379	0.408158	0.623763	0.570977	0.407152	0.587607
17	0.426045	0.416031	0.402276	0.410388	0.627864	0.568653	0.408923	0.595624
17.33	0.43069	0.419653	0.404218	0.413497	0.630059	0.565373	0.410164	0.603716
17.67	0.429104	0.427022	0.403458	0.409856	0.624754	0.574145	0.405662	0.606757
18	0.430135	0.431474	0.40672	0.417663	0.626396	0.572976	0.408564	0.615399
18.33	0.42836	0.432232	0.404009	0.418123	0.625189	0.566265	0.408409	0.61417
18.67	0.430802	0.431432	0.395321	0.416714	0.625552	0.574827	0.412001	0.611828
19	0.431316	0.428424	0.404849	0.413785	0.627024	0.571381	0.406124	0.615463
19.33	0.433182	0.433552	0.40469	0.416901	0.63131	0.583047	0.405482	0.620295
19.67	0.436873	0.432049	0.405519	0.413654	0.619507	0.570088	0.409797	0.614711
20	0.434999	0.437968	0.403554	0.416443	0.631372	0.573727	0.406839	0.630712
20.33	0.43718	0.438009	0.404539	0.416026	0.630357	0.578023	0.4059	0.629097
20.67	0.441938	0.439164	0.409625	0.413684	0.624737	0.576971	0.406772	0.635664
21	0.438894	0.440001	0.408105	0.419492	0.626247	0.572789	0.407113	0.630648
21.33	0.44408	0.442647	0.411507	0.413643	0.624515	0.573608	0.400596	0.635863
21.67	0.440211	0.444678	0.408889	0.412449	0.618263	0.57472	0.408832	0.632206
22	0.442268	0.443128	0.402271	0.419806	0.628941	0.578058	0.415373	0.63911
22.33	0.444356	0.445139	0.408058	0.418357	0.621388	0.571833	0.407042	0.643339
22.67	0.44613	0.443238	0.409178	0.415079	0.621695	0.576679	0.405925	0.649482
23	0.446891	0.446727	0.40731	0.41687	0.628165	0.576963	0.407193	0.648405
23.33	0.448261	0.44628	0.402363	0.417733	0.628477	0.577236	0.406638	0.651675
23.67	0.452697	0.447234	0.406328	0.414932	0.632269	0.576588	0.406338	0.646623
24	0.449848	0.455232	0.401994	0.418642	0.627795	0.576258	0.402923	0.654495
24.33	0.451503	0.446345	0.407418	0.415805	0.623616	0.572348	0.408291	0.65635
24.67	0.452541	0.448931	0.404097	0.416283	0.629732	0.580158	0.410363	0.656085
25	0.45683	0.452782	0.407614	0.416628	0.629224	0.57698	0.404859	0.655994
25.33	0.454781	0.453746	0.407312	0.414183	0.631783	0.580739	0.409289	0.661892
25.67	0.455433	0.458257	0.405989	0.416082	0.625654	0.578626	0.404908	0.664567
26	0.456035	0.45546	0.406411	0.415571	0.63029	0.577922	0.40608	0.670938
26.33	0.456965	0.454295	0.405859	0.413642	0.629349	0.572977	0.401222	0.669022
26.67	0.461577	0.457034	0.403224	0.413208	0.62606	0.580576	0.403359	0.667924
27	0.458869	0.463652	0.402968	0.414969	0.628445	0.57715	0.407534	0.667764
27.33	0.459084	0.459675	0.402557	0.417616	0.631166	0.577333	0.405442	0.678656
27.67	0.461933	0.466699	0.401899	0.414366	0.633818	0.579254	0.4037	0.683464
28	0.460667	0.463047	0.403788	0.416771	0.625363	0.575802	0.406184	0.679315
28.33	0.464247	0.462585	0.409906	0.41977	0.627666	0.583139	0.406232	0.695025
28.67	0.460291	0.462069	0.407084	0.421016	0.628479	0.581021	0.405981	0.683001
29	0.470296	0.469232	0.408239	0.413879	0.632363	0.578462	0.407462	0.689846
29.33	0.464362	0.462726	0.406301	0.415272	0.629707	0.57757	0.404966	0.684127
29.67	0.466718	0.467553	0.405637	0.416845	0.628291	0.572573	0.403011	0.698468
30	0.463433	0.467791	0.406669	0.415726	0.626523	0.578148	0.406478	0.698618
30.33	0.469891	0.47046	0.402783	0.415162	0.632324	0.580038	0.40283	0.695069
30.67	0.47283	0.471404	0.406202	0.41698	0.630031	0.575984	0.400308	0.693681
31	0.470789	0.46949	0.408651	0.413105	0.621417	0.577905	0.401158	0.704418
31.33	0.469629	0.471318	0.407435	0.412324	0.625563	0.581882	0.404386	0.702362
31.67	0.472405	0.469581	0.408243	0.414357	0.625311	0.577055	0.404456	0.707217
32	0.473429	0.468773	0.409216	0.418837	0.625356	0.578155	0.402812	0.708125
32.33	0.472847	0.472666	0.407762	0.417472	0.633606	0.575847	0.404027	0.706894
32.67	0.474547	0.477766	0.406431	0.415505	0.632445	0.576894	0.402571	0.708663
33	0.478189	0.476002	0.409423	0.414178	0.618569	0.581473	0.404081	0.712452
33.33	0.477282	0.472211	0.404686	0.419373	0.624151	0.584787	0.404513	0.71733
33.67	0.47728	0.480859	0.406592	0.417188	0.622054	0.578521	0.402507	0.720584
34	0.476377	0.474221	0.407139	0.414992	0.629752	0.582047	0.402305	0.71278
34.33	0.47646	0.479754	0.407064	0.414173	0.634357	0.581798	0.407525	0.717262
34.67	0.480229	0.480291	0.403486	0.416526	0.622431	0.579791	0.403635	0.720631
35	0.480017	0.479345	0.408155	0.4134	0.634354	0.582382	0.400159	0.731181
35.33	0.480227	0.480945	0.409081	0.412274	0.634405	0.586235	0.402864	0.728328
35.67	0.483898	0.481958	0.405303	0.414451	0.627964	0.577934	0.403774	0.724479
36	0.479173	0.477407	0.407779	0.41516	0.623525	0.584842	0.402952	0.732839
36.33	0.481948	0.481348	0.405849	0.411773	0.618165	0.57777	0.40118	0.739528
36.67	0.482905	0.483224	0.406812	0.413724	0.627665	0.578941	0.405144	0.735846
37	0.477541	0.482782	0.405594	0.415841	0.625847	0.578618	0.404415	0.736874
37.33	0.486309	0.483527	0.407478	0.414477	0.627543	0.586705	0.404387	0.739396
37.67	0.480702	0.48606	0.40844	0.417738	0.628301	0.584656	0.407158	0.73387
38	0.487122	0.486106	0.410747	0.414052	0.616051	0.587168	0.405689	0.746768
38.33	0.486217	0.485194	0.407114	0.418473	0.632272	0.580433	0.402823	0.745052
38.67	0.487315	0.487304	0.40508	0.414879	0.631957	0.578394	0.400715	0.744825
39	0.485188	0.486687	0.403941	0.417026	0.633232	0.579758	0.403292	0.746536
39.33	0.48451	0.486619	0.402463	0.416651	0.633953	0.584799	0.401761	0.749539
39.67	0.491349	0.486526	0.408025	0.417479	0.632431	0.582651	0.403348	0.74934
40	0.491832	0.489561	0.401867	0.421142	0.639763	0.582997	0.404292	0.752635
40.33	0.487294	0.488056	0.404629	0.416413	0.632095	0.580762	0.401036	0.752881
40.67	0.484755	0.489051	0.403748	0.415684	0.632493	0.583233	0.405984	0.755401
41	0.487814	0.487756	0.403815	0.417953	0.628526	0.579584	0.402371	0.764017
41.33	0.493284	0.492206	0.403944	0.414313	0.636281	0.585525	0.400887	0.761999
41.67	0.48874	0.49317	0.405045	0.415553	0.622452	0.579567	0.402158	0.753475
42	0.493096	0.492108	0.408353	0.417185	0.628016	0.582788	0.404091	0.758526
42.33	0.492647	0.491563	0.40417	0.418028	0.633725	0.583242	0.402743	0.764921
42.67	0.490009	0.491854	0.404717	0.413642	0.636428	0.580215	0.403374	0.77023
43	0.492216	0.494525	0.401986	0.417336	0.629477	0.585536	0.404469	0.770054
43.33	0.493367	0.494661	0.40523	0.413935	0.633575	0.587728	0.404272	0.768617
43.67	0.493793	0.495147	0.404396	0.414227	0.638043	0.581908	0.402083	0.77141
44	0.49485	0.494765	0.40416	0.415519	0.633434	0.584814	0.404114	0.776883
44.33	0.495845	0.495683	0.404654	0.416071	0.626221	0.582552	0.403448	0.773331
44.67	0.498369	0.493667	0.406529	0.415591	0.636236	0.584494	0.405424	0.776261
45	0.492628	0.502273	0.401855	0.41776	0.634805	0.582014	0.402907	0.780644
45.33	0.496377	0.498863	0.403337	0.419529	0.637441	0.585788	0.402429	0.785157
45.67	0.498841	0.495136	0.401138	0.412102	0.634485	0.586651	0.405899	0.780393
46	0.495656	0.49598	0.400596	0.412039	0.633653	0.58168	0.40567	0.787869
46.33	0.492796	0.50037	0.407131	0.418539	0.629814	0.582517	0.401008	0.791841
46.67	0.499721	0.495102	0.401873	0.41357	0.633643	0.580632	0.39887	0.788977
47	0.495808	0.499642	0.405964	0.418055	0.640878	0.584667	0.405834	0.786691
47.33	0.502416	0.500616	0.404963	0.415586	0.638453	0.589249	0.40501	0.794995
47.67	0.498753	0.500567	0.404638	0.417056	0.638379	0.585503	0.405346	0.793908
48	0.501135	0.500461	0.405699	0.420437	0.634642	0.586046	0.404294	0.799728
48.33	0.501294	0.500851	0.407716	0.414882	0.635274	0.583782	0.405391	0.796252
48.67	0.498476	0.503221	0.408056	0.418795	0.633382	0.584894	0.403259	0.800314
49	0.499623	0.501275	0.408665	0.412975	0.63479	0.590886	0.402393	0.805474
49.33	0.50004	0.501431	0.410526	0.418398	0.629847	0.587744	0.403936	0.800371
49.67	0.500608	0.498983	0.405177	0.416696	0.632301	0.587993	0.400951	0.805533
50	0.499857	0.503721	0.399013	0.420623	0.629627	0.591007	0.401025	0.804405
50.33	0.500485	0.502917	0.403026	0.416354	0.636808	0.579957	0.402145	0.811356
50.67	0.503905	0.502772	0.40473	0.416138	0.636861	0.583098	0.401056	0.803839
51	0.504168	0.502502	0.40535	0.412748	0.63286	0.586449	0.405217	0.804377
51.33	0.501338	0.505867	0.405435	0.420235	0.634276	0.588439	0.403077	0.819945
51.67	0.501519	0.504568	0.404551	0.415343	0.638064	0.586215	0.398892	0.819492
52	0.504894	0.506945	0.406051	0.419899	0.631219	0.585632	0.402108	0.816123
52.33	0.505906	0.501323	0.406124	0.41969	0.638482	0.588908	0.406056	0.819628
52.67	0.502772	0.506547	0.403657	0.41638	0.639849	0.588221	0.403539	0.821747
53	0.506936	0.506748	0.405784	0.418778	0.639297	0.587888	0.405855	0.822663
53.33	0.509549	0.507934	0.405445	0.418465	0.631305	0.588187	0.404482	0.819875
53.67	0.50626	0.509413	0.404006	0.416438	0.638604	0.586643	0.400147	0.822294
54	0.505247	0.508436	0.409128	0.417627	0.63755	0.58924	0.40512	0.82457
54.33	0.50507	0.508381	0.406131	0.417763	0.641473	0.584711	0.40192	0.832529
54.67	0.505352	0.504167	0.404718	0.419052	0.639596	0.58953	0.404909	0.835884
55	0.509347	0.513315	0.404992	0.415924	0.633868	0.590141	0.402716	0.828207
55.33	0.507003	0.511284	0.400934	0.41864	0.637513	0.584899	0.401271	0.829676
55.67	0.507735	0.507027	0.404418	0.41762	0.64336	0.588597	0.401853	0.835795
56	0.50681	0.510534	0.404267	0.417073	0.639714	0.587873	0.401123	0.830535
56.33	0.505731	0.50926	0.403177	0.414904	0.63652	0.584653	0.4049	0.839681
56.67	0.509236	0.515042	0.403591	0.417399	0.635703	0.591521	0.40188	0.841223
57	0.507049	0.510751	0.404897	0.417811	0.642094	0.591545	0.403226	0.842352
57.33	0.510881	0.51065	0.403202	0.412954	0.635952	0.590689	0.401996	0.843775
57.67	0.512068	0.511077	0.402943	0.415459	0.635646	0.589336	0.400673	0.840103
58	0.509559	0.510032	0.399954	0.416658	0.638513	0.587274	0.400607	0.841957
58.33	0.510842	0.513336	0.402321	0.415123	0.636873	0.590105	0.401792	0.85216
58.67	0.510681	0.512513	0.401633	0.413244	0.640413	0.588877	0.406183	0.8544
59	0.50801	0.513023	0.403339	0.415675	0.634028	0.585292	0.403847	0.84783
59.33	0.506115	0.513587	0.406876	0.419378	0.634366	0.591549	0.405497	0.848059
59.67	0.510899	0.512186	0.404555	0.417461	0.637351	0.585491	0.400288	0.85734

## Sheet: Fig3-fig supp 6 panel B
Condition		Slopes (15-20 min)					relative to condition 1
n	descript.	repeat1	repeat2		average	std. dev	average	std. dev
1	-	0.00746634	0.0092918		0.00837907	0.0012908	1	0.15405
2	Amp	0.00768716	0.0106137		0.00915042	0.00206936	1	0.226149
Condition		Slopes (0-1.3 min)					relative to condition 1
n	descript.	repeat1	repeat2		average	std. dev	average	std. dev
3	LpoB	0.107821	0.0990985		0.10346	0.00616807	12.3474	0.736128
4	LpoB/Amp	0.114151	0.0833972		0.098774	0.021746	10.7945	2.3765
