# Supplementary material for: Real-time monitoring of peptidoglycan synthesis by membrane-reconstituted penicillin-binding proteins
Source: eLife journal article supplement (doi:10.7554/elife.61525), 2021-02-24
Supplement: supp [file Figure3-figure supplement 8-source file.xlsx]

## Sheet: Fig3-fig supp 7 panel A
time (min)	PaPBP1B	Amp	Moe	Only labelled	LpoP	LpoP/Amp	LpoP/Moe	LpoP/Only labelled
0	0.364954	0.389244	0.375239	0.428985	0.410717	0.398616	0.412131	0.400176
0.33	0.371477	0.373968	0.363775	0.396777	0.392595	0.403304	0.399856	0.397439
0.67	0.367082	0.356628	0.375199	0.383488	0.403555	0.41315	0.395497	0.402552
1	0.368913	0.36829	0.377711	0.396339	0.42956	0.430839	0.395262	0.40685
1.33	0.374422	0.370958	0.37535	0.383477	0.471836	0.449606	0.384931	0.40164
1.67	0.371435	0.374658	0.387541	0.383483	0.520226	0.466907	0.392285	0.399139
2	0.373168	0.373313	0.378853	0.378955	0.557992	0.482089	0.38516	0.398601
2.33	0.374056	0.368601	0.374755	0.382286	0.606165	0.503548	0.383115	0.402122
2.67	0.358226	0.362768	0.374159	0.378673	0.665287	0.520559	0.383283	0.405053
3	0.357821	0.356664	0.379686	0.372368	0.721476	0.538155	0.384881	0.402405
3.33	0.372088	0.370387	0.376093	0.377096	0.775324	0.551551	0.386816	0.401169
3.67	0.370327	0.373122	0.375775	0.379193	0.851846	0.56518	0.381867	0.397879
4	0.373763	0.370389	0.376176	0.370891	0.918447	0.575454	0.381551	0.400901
4.33	0.373076	0.372778	0.372336	0.388306	0.961343	0.583903	0.38014	0.404211
4.67	0.371247	0.372564	0.372127	0.375246	1.01556	0.579288	0.379088	0.396808
5	0.379183	0.36827	0.367733	0.374994	1.101	0.603084	0.385437	0.400763
5.33	0.36269	0.365322	0.365471	0.370441	1.152	0.606817	0.375572	0.398149
5.67	0.373369	0.367689	0.369788	0.379585	1.19526	0.608764	0.383245	0.397521
6	0.368081	0.372388	0.369488	0.378535	1.24033	0.614671	0.380091	0.398726
6.33	0.372835	0.366707	0.368134	0.366943	1.2692	0.615686	0.378127	0.396399
6.67	0.373079	0.366014	0.368608	0.374331	1.3146	0.614816	0.380613	0.398608
7	0.369629	0.362147	0.365283	0.374541	1.34037	0.613167	0.373268	0.399123
7.33	0.37048	0.360825	0.36525	0.367781	1.3734	0.618702	0.377297	0.398844
7.67	0.368352	0.36298	0.360327	0.384219	1.36806	0.613657	0.378784	0.396212
8	0.370034	0.362826	0.368881	0.383336	1.38808	0.610361	0.376164	0.389024
8.33	0.377917	0.367806	0.368766	0.376896	1.41684	0.617098	0.372456	0.39488
8.67	0.369756	0.352823	0.361511	0.362053	1.44862	0.624111	0.377895	0.390755
9	0.383763	0.362858	0.371274	0.383471	1.42136	0.614166	0.375484	0.395299
9.33	0.385052	0.364707	0.371333	0.369856	1.4523	0.623149	0.376311	0.393537
9.67	0.390633	0.35568	0.370852	0.359386	1.46494	0.619265	0.368516	0.389021
10	0.391898	0.364013	0.372073	0.383809	1.48664	0.613067	0.373049	0.394617
10.33	0.394724	0.36468	0.373179	0.379923	1.46718	0.611564	0.371907	0.3902
10.67	0.40368	0.369173	0.368031	0.374277	1.47624	0.617374	0.370156	0.397144
11	0.406852	0.374378	0.370544	0.366842	1.49375	0.614019	0.370367	0.397847
11.33	0.415061	0.360955	0.372162	0.377869	1.47182	0.61506	0.367702	0.394733
11.67	0.399829	0.373565	0.37032	0.35551	1.52528	0.619285	0.371867	0.396415
12	0.411475	0.37054	0.375555	0.369788	1.52301	0.613575	0.364767	0.402429
12.33	0.427875	0.382197	0.369826	0.36179	1.54885	0.617188	0.372104	0.402922
12.67	0.430666	0.369536	0.369526	0.374185	1.5191	0.609715	0.372135	0.408234
13	0.431765	0.381254	0.375735	0.355374	1.50564	0.604078	0.376928	0.409085
13.33	0.43848	0.3786	0.371134	0.35769	1.53115	0.605001	0.366767	0.405243
13.67	0.436167	0.381067	0.373258	0.358108	1.57846	0.613545	0.365903	0.406244
14	0.447408	0.383974	0.37176	0.365039	1.61538	0.620313	0.370788	0.411555
14.33	0.449491	0.383393	0.368189	0.36121	1.6018	0.621811	0.367273	0.404374
14.67	0.45344	0.384345	0.37419	0.37026	1.61582	0.627843	0.372331	0.406042
15	0.457261	0.379796	0.368599	0.376027	1.63614	0.627553	0.369	0.409473
15.33	0.465074	0.384452	0.371508	0.383337	1.61967	0.625199	0.371133	0.409314
15.67	0.468477	0.380633	0.372918	0.378482	1.61652	0.624516	0.375078	0.408184
16	0.473968	0.381998	0.370351	0.367899	1.63756	0.629549	0.372273	0.408489
16.33	0.478891	0.388051	0.373558	0.360145	1.63796	0.632772	0.373755	0.411905
16.67	0.48485	0.381539	0.371578	0.361322	1.64016	0.630591	0.372341	0.4071
17	0.484012	0.393747	0.372469	0.379203	1.66075	0.633784	0.372604	0.412482
17.33	0.488184	0.38412	0.367397	0.362731	1.64168	0.625678	0.369486	0.410003
17.67	0.493056	0.396065	0.365171	0.370667	1.65862	0.634971	0.370127	0.412322
18	0.505327	0.381705	0.368638	0.366504	1.66024	0.626134	0.367609	0.412007
18.33	0.511728	0.399434	0.370178	0.371761	1.66274	0.631733	0.368676	0.410303
18.67	0.51352	0.399763	0.371824	0.362805	1.66698	0.634014	0.365774	0.411794
19	0.5204	0.388662	0.374597	0.363318	1.6574	0.625793	0.373565	0.409526
19.33	0.520619	0.394135	0.370641	0.361535	1.65471	0.628121	0.366608	0.411225
19.67	0.527294	0.392996	0.370456	0.366193	1.66626	0.634241	0.368367	0.414382
20	0.534016	0.394096	0.370109	0.36213	1.66698	0.633044	0.369802	0.410442
20.33	0.525482	0.406227	0.367395	0.368368	1.67846	0.630713	0.368644	0.413205
20.67	0.538779	0.40087	0.36812	0.365909	1.66889	0.625197	0.36748	0.415084
21	0.548219	0.397181	0.371157	0.358142	1.66466	0.627061	0.365494	0.414001
21.33	0.553554	0.396939	0.373585	0.369301	1.67892	0.63136	0.369203	0.413327
21.67	0.555622	0.40478	0.370966	0.364849	1.68353	0.629012	0.369845	0.412064
22	0.553523	0.40528	0.371311	0.377394	1.67705	0.629266	0.368373	0.412813
22.33	0.555272	0.401902	0.372678	0.361441	1.67099	0.633629	0.368699	0.416177
22.67	0.566674	0.409679	0.370139	0.358312	1.6753	0.630327	0.370005	0.41453
23	0.568877	0.406486	0.368192	0.35859	1.68885	0.629165	0.368636	0.413202
23.33	0.573761	0.411228	0.372052	0.365659	1.6915	0.629769	0.371624	0.415675
23.67	0.578831	0.410585	0.367554	0.356846	1.69744	0.627247	0.367974	0.415511
24	0.581458	0.405996	0.369127	0.357512	1.69166	0.628389	0.366885	0.415095
24.33	0.590166	0.40861	0.367611	0.358298	1.68141	0.627004	0.366292	0.415215
24.67	0.591527	0.409169	0.370395	0.36085	1.68689	0.629525	0.373967	0.417818
25	0.594024	0.413411	0.372057	0.356967	1.68866	0.627314	0.367798	0.419045
25.33	0.602072	0.414691	0.366812	0.359501	1.69689	0.628189	0.368136	0.41693
25.67	0.605975	0.416545	0.369533	0.359338	1.69525	0.630614	0.366346	0.416256
26	0.610565	0.417027	0.36829	0.366257	1.6925	0.632003	0.365125	0.421224
26.33	0.619951	0.40937	0.368934	0.360558	1.69946	0.633967	0.368974	0.417271
26.67	0.618065	0.418959	0.36701	0.35665	1.68919	0.630543	0.369814	0.415926
27	0.616486	0.416478	0.367157	0.35698	1.68463	0.62645	0.36734	0.41841
27.33	0.627342	0.420252	0.36597	0.367029	1.68855	0.630055	0.367079	0.418234
27.67	0.62849	0.424416	0.366993	0.35616	1.70957	0.628889	0.363995	0.421304
28	0.629584	0.424103	0.368386	0.358136	1.69981	0.629676	0.367559	0.421217
28.33	0.635145	0.419273	0.367854	0.366975	1.69575	0.623164	0.366517	0.419895
28.67	0.640533	0.421126	0.368895	0.359847	1.69539	0.628749	0.364374	0.418885
29	0.638887	0.425508	0.36669	0.358019	1.68924	0.627454	0.367718	0.422207
29.33	0.645182	0.423767	0.366248	0.358681	1.70385	0.627131	0.366447	0.424796
29.67	0.649417	0.426748	0.369161	0.359305	1.70096	0.629091	0.368682	0.424269
30	0.649487	0.427315	0.367519	0.359791	1.69999	0.620017	0.366454	0.425023
30.33	0.653275	0.426184	0.370263	0.361718	1.68826	0.627074	0.365131	0.422257
30.67	0.658552	0.427103	0.373192	0.361299	1.70336	0.626424	0.365717	0.423915
31	0.659599	0.429391	0.369777	0.373847	1.69611	0.626087	0.365734	0.422138
31.33	0.662542	0.428159	0.367925	0.369782	1.6984	0.623759	0.366025	0.419063
31.67	0.664472	0.42562	0.367831	0.369241	1.69914	0.629223	0.363511	0.419946
32	0.672101	0.428386	0.368594	0.358108	1.70694	0.629754	0.367218	0.420508
32.33	0.678013	0.431707	0.369387	0.359735	1.70712	0.623766	0.367599	0.426305
32.67	0.680778	0.433957	0.366499	0.358606	1.70407	0.628057	0.368363	0.424824
33	0.679175	0.436119	0.370266	0.359681	1.69339	0.629402	0.365444	0.423512
33.33	0.684386	0.434666	0.366693	0.363171	1.70516	0.628653	0.365532	0.427318
33.67	0.683258	0.435462	0.366598	0.360733	1.69221	0.626901	0.367304	0.422348
34	0.686688	0.439384	0.368895	0.357726	1.69662	0.629246	0.367968	0.427101
34.33	0.691539	0.435791	0.366737	0.36558	1.7018	0.625379	0.366798	0.423087
34.67	0.701404	0.437734	0.370175	0.354796	1.6978	0.629777	0.366777	0.426455
35	0.699291	0.438143	0.367204	0.35763	1.69788	0.628652	0.367146	0.428136
35.33	0.702119	0.439551	0.367194	0.359242	1.70124	0.62381	0.365093	0.418174
35.67	0.701761	0.439618	0.367143	0.360675	1.69186	0.62945	0.366696	0.426132
36	0.706607	0.441208	0.367512	0.360834	1.70924	0.628094	0.365252	0.43063
36.33	0.713003	0.438535	0.366795	0.362346	1.70508	0.62323	0.367284	0.42733
36.67	0.71354	0.442535	0.369534	0.356777	1.69385	0.624243	0.36478	0.425113
37	0.710348	0.44418	0.371103	0.361042	1.70435	0.628183	0.365142	0.429057
37.33	0.719033	0.4426	0.369358	0.357302	1.69005	0.627882	0.367646	0.429783
37.67	0.716413	0.446633	0.368238	0.35804	1.69327	0.626718	0.36711	0.426222
38	0.712715	0.443229	0.368483	0.35686	1.71377	0.627878	0.362337	0.427035
38.33	0.727871	0.443556	0.369045	0.361553	1.70099	0.626044	0.368253	0.429186
38.67	0.724381	0.446335	0.364701	0.360257	1.69881	0.626181	0.366881	0.429934
39	0.731059	0.448537	0.368343	0.358092	1.70874	0.626823	0.367619	0.429846
39.33	0.730186	0.449229	0.368553	0.365775	1.70594	0.624755	0.367262	0.431428
39.67	0.733022	0.450772	0.369405	0.354157	1.71309	0.625643	0.364195	0.432715
40	0.736124	0.446304	0.368428	0.362333	1.70731	0.626158	0.363373	0.42699
40.33	0.739732	0.452084	0.369297	0.357296	1.70868	0.630442	0.365211	0.427238
40.67	0.74007	0.446624	0.369799	0.35915	1.71024	0.624353	0.36347	0.428856
41	0.748274	0.449199	0.36683	0.357393	1.70285	0.625054	0.366356	0.430711
41.33	0.755679	0.452799	0.366553	0.366696	1.70169	0.626668	0.364484	0.429889
41.67	0.748396	0.452864	0.367946	0.35876	1.70428	0.624779	0.366673	0.436673
42	0.74988	0.449778	0.367462	0.358463	1.70076	0.627316	0.364881	0.429658
42.33	0.75764	0.454987	0.369714	0.360764	1.70267	0.628547	0.368522	0.433484
42.67	0.76066	0.45148	0.366861	0.361715	1.68446	0.628888	0.365225	0.431098
43	0.75056	0.454579	0.367474	0.360177	1.7066	0.6284	0.361496	0.429016
43.33	0.759465	0.458948	0.368441	0.365652	1.68958	0.628342	0.364464	0.429225
43.67	0.760257	0.45238	0.363017	0.357032	1.69032	0.629434	0.365585	0.432925
44	0.76635	0.457453	0.370496	0.358169	1.69866	0.621243	0.367092	0.432979
44.33	0.764294	0.457189	0.367261	0.359505	1.70988	0.622932	0.369476	0.440074
44.67	0.771031	0.457977	0.367963	0.35927	1.68735	0.626976	0.366615	0.433315
45	0.765612	0.460096	0.365608	0.358514	1.69108	0.626425	0.364435	0.431441
45.33	0.770684	0.454959	0.367466	0.357362	1.70084	0.627721	0.364849	0.434488
45.67	0.769389	0.455184	0.36523	0.357496	1.70551	0.623954	0.366288	0.436502
46	0.776367	0.461289	0.363769	0.362765	1.69778	0.626586	0.365672	0.438036
46.33	0.777803	0.457444	0.368147	0.357207	1.70118	0.624661	0.365123	0.433979
46.67	0.776196	0.459732	0.366493	0.358172	1.69543	0.620653	0.365606	0.436194
47	0.788356	0.45779	0.367123	0.359024	1.69816	0.627521	0.366564	0.436314
47.33	0.783452	0.460927	0.367731	0.359719	1.69366	0.624242	0.3671	0.438133
47.67	0.784268	0.459826	0.369871	0.355723	1.7033	0.627052	0.364496	0.439341
48	0.78939	0.461335	0.367605	0.359021	1.6879	0.625956	0.365359	0.434039
48.33	0.787002	0.461241	0.367756	0.363756	1.68297	0.625626	0.367415	0.439273
48.67	0.789821	0.461844	0.36505	0.35574	1.70501	0.623947	0.36226	0.430513
49	0.793463	0.462914	0.368266	0.357747	1.68802	0.623878	0.365988	0.441483
49.33	0.801464	0.464509	0.36825	0.362318	1.70577	0.62407	0.366835	0.436138
49.67	0.796071	0.466621	0.368472	0.359003	1.69787	0.62368	0.364437	0.432571
50	0.797716	0.466436	0.367602	0.35843	1.70761	0.620689	0.365954	0.43879
50.33	0.800424	0.464834	0.366716	0.35744	1.70171	0.624648	0.36705	0.437713
50.67	0.803267	0.46404	0.366487	0.357534	1.69592	0.627153	0.367477	0.436411
51	0.800346	0.467955	0.366381	0.357481	1.71434	0.625357	0.364368	0.433885
51.33	0.805284	0.470827	0.366001	0.360846	1.69706	0.62438	0.364544	0.434649
51.67	0.806393	0.469187	0.36976	0.357457	1.70258	0.622243	0.365463	0.439547
52	0.805214	0.468028	0.36541	0.35661	1.7128	0.624713	0.361937	0.432533
52.33	0.814784	0.471393	0.370335	0.357925	1.70714	0.622298	0.364828	0.434303
52.67	0.812174	0.467407	0.368637	0.358724	1.69791	0.620012	0.363982	0.439732
53	0.813326	0.467939	0.366252	0.360412	1.69203	0.61892	0.365124	0.439171
53.33	0.812205	0.468709	0.366674	0.357413	1.70062	0.623931	0.364818	0.435066
53.67	0.818454	0.471826	0.37172	0.358538	1.70658	0.621252	0.362777	0.435394
54	0.818341	0.471175	0.366945	0.359682	1.69607	0.626016	0.362948	0.436087
54.33	0.81671	0.464345	0.36358	0.357181	1.71157	0.619694	0.367475	0.438985
54.67	0.823677	0.471808	0.364397	0.357151	1.6951	0.626334	0.365659	0.434361
55	0.815719	0.472072	0.367712	0.356329	1.68966	0.622412	0.364281	0.438489
55.33	0.829645	0.471323	0.367738	0.358393	1.68305	0.623262	0.367188	0.440087
55.67	0.831902	0.473185	0.371439	0.356774	1.69566	0.620476	0.363718	0.43992
56	0.826069	0.474858	0.367232	0.358185	1.69722	0.622379	0.365175	0.439979
56.33	0.828326	0.47425	0.36988	0.356281	1.69171	0.62153	0.363452	0.441668
56.67	0.835437	0.471642	0.365249	0.358138	1.68002	0.623964	0.362888	0.440087
57	0.829325	0.470382	0.367677	0.357261	1.68575	0.623012	0.363318	0.443251
57.33	0.838799	0.474281	0.366534	0.359357	1.70799	0.619895	0.367643	0.440488
57.67	0.821942	0.472373	0.372445	0.360074	1.69964	0.62404	0.3635	0.443927
58	0.834792	0.477111	0.367615	0.360402	1.69023	0.618956	0.369047	0.438584
58.33	0.833297	0.475402	0.366486	0.355723	1.68392	0.619838	0.361412	0.434564
58.67	0.829553	0.474796	0.364217	0.356171	1.69482	0.62424	0.364203	0.441871
59	0.83704	0.477579	0.365581	0.362295	1.68051	0.62293	0.364158	0.441989
59.33	0.834844	0.478259	0.369188	0.357309	1.70061	0.623601	0.364483	0.443746
59.67	0.836256	0.476374	0.365209	0.356744	1.71913	0.625612	0.365723	0.442121

## Sheet: Fig3-fig supp 7 panel B
Condition		Slopes (10 - 20 min)					relative to condition 1
n	descript.	repeat1	repeat2	repeat3	average	std. dev	average	std. dev
1	-	0.0206415	0.0214452	0.0185227	0.0202031	0.00150979	1	0.0747303
2	Amp	0.00432547	0.00560703		0.00496625	0.000906203	1	0.182472
Condition		Slopes (0.67 - 3.33 min)					relative to condition 1
n	descript.	repeat1	repeat2	repeat3	average	std. dev	average	std. dev
3	LpoP	0.207247	0.24746	0.241714	0.232141	0.0217493	11.4903	1.07653
4	LpoP/Amp	0.0770357	0.116271		0.0966536	0.0277438	19.4621	5.58648
