# Supplementary material for: Real-time monitoring of peptidoglycan synthesis by membrane-reconstituted penicillin-binding proteins
Source: eLife journal article supplement (doi:10.7554/elife.61525), 2021-02-24
Supplement: supp [file Figure3-source file.xlsx]

## Sheet: Fig3 panel C
time (min)	PBP1B	Amp	Moe	Only labelled	LpoB	LpoB/Amp	LpoB/moe	LpoB/Only labelled
0	0.433931	0.440012	0.647163	0.473649	0.480657	0.645414	0.428097	0.436736
0.33	0.431486	0.436268	0.637868	0.478695	0.493204	0.647757	0.426963	0.438742
0.67	0.429829	0.436654	0.640526	0.49452	0.510806	0.645797	0.428214	0.441398
1	0.432502	0.42853	0.639827	0.50435	0.517045	0.647303	0.428204	0.446232
1.33	0.433352	0.432534	0.636697	0.52202	0.541188	0.639179	0.431452	0.448768
1.67	0.431095	0.434304	0.635974	0.533982	0.554345	0.639246	0.422544	0.454119
2	0.431301	0.43275	0.630122	0.544519	0.567446	0.639875	0.424092	0.454822
2.33	0.4313	0.430865	0.62442	0.539028	0.579701	0.636373	0.424861	0.462451
2.67	0.429237	0.43041	0.623369	0.566402	0.592002	0.634616	0.421729	0.469781
3	0.428749	0.431619	0.616703	0.578496	0.604927	0.631576	0.423432	0.470051
3.33	0.429934	0.42942	0.614151	0.587594	0.616369	0.629632	0.421424	0.471282
3.67	0.426998	0.42883	0.609685	0.593556	0.625462	0.629678	0.42282	0.478861
4	0.424871	0.436152	0.620791	0.608815	0.639688	0.629109	0.422538	0.479209
4.33	0.427606	0.430101	0.606851	0.619911	0.656281	0.6218	0.421	0.481927
4.67	0.426946	0.429482	0.602445	0.631221	0.660842	0.621632	0.421041	0.485152
5	0.428282	0.425675	0.602563	0.638526	0.67504	0.620352	0.420579	0.493877
5.33	0.42808	0.431442	0.5973	0.656197	0.690539	0.622445	0.419523	0.499136
5.67	0.430596	0.429151	0.599314	0.660149	0.697721	0.61459	0.42289	0.498832
6	0.428411	0.434191	0.593694	0.670407	0.706658	0.614696	0.420282	0.500862
6.33	0.429258	0.429269	0.603464	0.681072	0.716775	0.617197	0.421195	0.507495
6.67	0.428336	0.427107	0.599654	0.693602	0.731154	0.617216	0.419174	0.50755
7	0.425977	0.436204	0.59789	0.705737	0.747301	0.612885	0.420486	0.513217
7.33	0.431766	0.427998	0.590546	0.71924	0.752191	0.611301	0.423934	0.514877
7.67	0.426783	0.427671	0.595481	0.720637	0.761095	0.61074	0.417964	0.519559
8	0.426223	0.42994	0.596644	0.735249	0.770204	0.606122	0.416253	0.523045
8.33	0.427716	0.430179	0.584236	0.74707	0.794985	0.607404	0.417136	0.528791
8.67	0.428652	0.434644	0.589771	0.752688	0.79685	0.606113	0.420069	0.522167
9	0.427339	0.429943	0.587394	0.757425	0.800843	0.603068	0.418078	0.531521
9.33	0.431812	0.430773	0.583939	0.772802	0.808266	0.601987	0.420992	0.532813
9.67	0.415364	0.42837	0.588242	0.777434	0.82115	0.607612	0.415889	0.537558
10	0.427888	0.430861	0.581463	0.788009	0.83246	0.603697	0.416397	0.543135
10.33	0.42718	0.43239	0.581421	0.792636	0.837526	0.602471	0.418862	0.547837
10.67	0.428645	0.429207	0.579347	0.80492	0.846993	0.60161	0.420681	0.542927
11	0.431652	0.430442	0.574422	0.813638	0.85816	0.595629	0.42094	0.551862
11.33	0.429713	0.430027	0.573363	0.824527	0.869462	0.592543	0.418032	0.551927
11.67	0.430697	0.438562	0.57381	0.833539	0.876377	0.597018	0.418036	0.559627
12	0.427083	0.428844	0.574573	0.834055	0.881334	0.59248	0.415072	0.56001
12.33	0.429026	0.438911	0.568349	0.847806	0.890399	0.595856	0.419783	0.56147
12.67	0.427544	0.429093	0.567511	0.854658	0.891666	0.593682	0.419478	0.564122
13	0.431024	0.431991	0.572894	0.862016	0.905737	0.591711	0.41847	0.566274
13.33	0.43461	0.432193	0.565809	0.869396	0.913319	0.597529	0.417808	0.569308
13.67	0.434419	0.43615	0.565251	0.870868	0.924474	0.592957	0.419022	0.569787
14	0.43276	0.433465	0.563955	0.885311	0.940267	0.592228	0.418405	0.57919
14.33	0.433559	0.434636	0.563107	0.894432	0.936137	0.589337	0.416838	0.577397
14.67	0.438731	0.434069	0.557461	0.907442	0.949246	0.587231	0.414905	0.580118
15	0.432463	0.432313	0.560476	0.910563	0.943923	0.589389	0.415961	0.580467
15.33	0.431553	0.43653	0.558064	0.921138	0.960052	0.584234	0.41922	0.579284
15.67	0.434775	0.440314	0.55689	0.922804	0.971379	0.59086	0.419795	0.587102
16	0.437597	0.437959	0.560931	0.927378	0.969883	0.588137	0.419601	0.586712
16.33	0.438808	0.441627	0.562173	0.93179	0.97629	0.582041	0.41647	0.595443
16.67	0.43856	0.435171	0.550439	0.945806	0.995181	0.581998	0.418007	0.596688
17	0.442366	0.437654	0.557402	0.950103	0.996274	0.581468	0.421391	0.595018
17.33	0.441001	0.444639	0.550802	0.960271	0.993648	0.58289	0.416877	0.59534
17.67	0.438662	0.439358	0.559848	0.960999	1.00581	0.584067	0.418435	0.600313
18	0.438906	0.439304	0.55504	0.978155	1.00597	0.586105	0.416404	0.61021
18.33	0.444031	0.435564	0.554509	0.977302	1.02532	0.57895	0.418389	0.608673
18.67	0.44055	0.440226	0.552637	0.989245	1.02584	0.580858	0.414143	0.615332
19	0.441752	0.437105	0.551151	0.989187	1.03227	0.581329	0.423256	0.614745
19.33	0.435039	0.433412	0.552829	1.0027	1.04675	0.586651	0.415975	0.610253
19.67	0.443438	0.438075	0.550323	1.01057	1.04919	0.581014	0.412062	0.613971
20	0.444667	0.442238	0.547944	1.01771	1.05386	0.58163	0.417563	0.615183
20.33	0.442134	0.449207	0.54601	1.0261	1.05284	0.575024	0.415497	0.613025
20.67	0.445104	0.447504	0.545884	1.02618	1.06636	0.575185	0.414576	0.618435
21	0.445388	0.449117	0.543543	1.04471	1.06493	0.57562	0.419746	0.621498
21.33	0.446338	0.440496	0.546099	1.03734	1.0815	0.579478	0.416055	0.626623
21.67	0.450488	0.445759	0.539619	1.04581	1.0879	0.576458	0.41719	0.632275
22	0.453576	0.442166	0.541264	1.04725	1.09109	0.578679	0.417021	0.632654
22.33	0.451064	0.44524	0.539833	1.0621	1.09081	0.574674	0.416045	0.633659
22.67	0.449711	0.44339	0.545954	1.06298	1.09881	0.570966	0.419308	0.639252
23	0.448639	0.441313	0.537926	1.06612	1.10053	0.572353	0.416476	0.635043
23.33	0.452785	0.443452	0.540441	1.07747	1.11079	0.574722	0.420494	0.639979
23.67	0.44928	0.449089	0.539556	1.08071	1.1163	0.572573	0.419164	0.644084
24	0.455754	0.441098	0.541702	1.09233	1.12744	0.568288	0.414774	0.641094
24.33	0.453993	0.442785	0.533899	1.09925	1.11877	0.570131	0.417079	0.647892
24.67	0.455696	0.444627	0.53971	1.10327	1.13352	0.570959	0.418068	0.649113
25	0.455894	0.444849	0.541085	1.11022	1.13242	0.567138	0.415803	0.654903
25.33	0.457012	0.44469	0.536	1.11533	1.13907	0.571187	0.417614	0.648489
25.67	0.457241	0.444178	0.538186	1.11619	1.14331	0.568511	0.417931	0.653292
26	0.458717	0.444859	0.532971	1.12559	1.1436	0.569694	0.416539	0.657491
26.33	0.461404	0.446977	0.539694	1.13478	1.15349	0.569745	0.415916	0.655629
26.67	0.461555	0.447205	0.536305	1.13399	1.15831	0.567256	0.419501	0.657673
27	0.459632	0.446966	0.536355	1.14562	1.16261	0.568107	0.420398	0.660498
27.33	0.459937	0.450106	0.533451	1.14119	1.16589	0.566462	0.423307	0.662462
27.67	0.465268	0.45434	0.533278	1.14991	1.18055	0.566562	0.417612	0.668215
28	0.46441	0.452187	0.528858	1.16427	1.17741	0.566008	0.417704	0.661165
28.33	0.46511	0.450612	0.531981	1.15922	1.1892	0.565375	0.419523	0.67132
28.67	0.469399	0.449906	0.533053	1.16329	1.18047	0.564384	0.415514	0.670709
29	0.469445	0.452526	0.530666	1.17832	1.20051	0.560441	0.418335	0.67077
29.33	0.467348	0.452984	0.530304	1.1915	1.19646	0.560743	0.420668	0.677204
29.67	0.469592	0.452862	0.529899	1.18479	1.19202	0.564853	0.416798	0.674772
30	0.471466	0.455944	0.531226	1.19588	1.19467	0.572574	0.419015	0.677854
30.33	0.475022	0.455752	0.531868	1.20805	1.21299	0.560147	0.418844	0.684233
30.67	0.469253	0.453483	0.526892	1.20149	1.20582	0.563487	0.416707	0.678815
31	0.474752	0.456276	0.527845	1.21149	1.20939	0.561894	0.414959	0.690086
31.33	0.472685	0.455895	0.532384	1.21974	1.22013	0.559184	0.417146	0.68627
31.67	0.470653	0.456034	0.524552	1.21726	1.21252	0.560879	0.418339	0.687388
32	0.475049	0.457135	0.526545	1.22561	1.23548	0.560103	0.41858	0.694517
32.33	0.478257	0.45505	0.530737	1.22975	1.22092	0.560055	0.418801	0.693263
32.67	0.476705	0.460732	0.531573	1.22386	1.23353	0.564049	0.417162	0.69296
33	0.478937	0.455118	0.527641	1.22459	1.24031	0.558211	0.417761	0.686454
33.33	0.47959	0.457481	0.526824	1.24433	1.23833	0.558673	0.421473	0.699198
33.67	0.482468	0.459088	0.527884	1.24194	1.2423	0.557344	0.414173	0.699994
34	0.485201	0.457919	0.531695	1.25311	1.25601	0.55926	0.416897	0.694722
34.33	0.486585	0.459845	0.524165	1.25596	1.25962	0.560694	0.416299	0.702976
34.67	0.487042	0.458398	0.528558	1.26894	1.26157	0.555951	0.418108	0.704092
35	0.485558	0.459539	0.527826	1.268	1.25889	0.555378	0.416545	0.704763
35.33	0.488934	0.460186	0.521695	1.27646	1.26522	0.556672	0.417892	0.705536
35.67	0.482354	0.463459	0.519236	1.2753	1.26144	0.557108	0.422702	0.703643
36	0.487924	0.46465	0.526193	1.28149	1.27787	0.554986	0.419353	0.713763
36.33	0.491388	0.464147	0.522028	1.29009	1.27337	0.555733	0.423868	0.704774
36.67	0.491448	0.463867	0.519403	1.28965	1.27615	0.558594	0.424681	0.712386
37	0.489937	0.463926	0.522158	1.30798	1.29101	0.554337	0.420184	0.707797
37.33	0.496172	0.465881	0.519154	1.29447	1.28267	0.552039	0.417647	0.7094
37.67	0.496606	0.465078	0.525995	1.30251	1.29465	0.558433	0.420714	0.713064
38	0.499371	0.466687	0.523918	1.3112	1.29114	0.554263	0.420747	0.71976
38.33	0.499774	0.464888	0.522841	1.30548	1.29139	0.550514	0.419574	0.717359
38.67	0.498787	0.472279	0.521478	1.31748	1.30255	0.555773	0.418721	0.720592
39	0.501441	0.470281	0.515866	1.32639	1.30678	0.551845	0.422369	0.717799
39.33	0.498797	0.470363	0.520088	1.33038	1.30406	0.55704	0.419398	0.727283
39.67	0.50068	0.476047	0.513293	1.33469	1.30934	0.552109	0.418898	0.722046
40	0.502428	0.471012	0.518646	1.32957	1.30208	0.551675	0.420624	0.728116
40.33	0.502746	0.469562	0.514701	1.33189	1.31253	0.554399	0.42112	0.72963
40.67	0.507114	0.467834	0.521264	1.33966	1.3201	0.552962	0.420337	0.72976
41	0.503438	0.470263	0.518387	1.34095	1.31821	0.548772	0.417315	0.732386
41.33	0.50772	0.47275	0.515667	1.36285	1.33458	0.552136	0.42164	0.733227
41.67	0.507026	0.474531	0.520058	1.36713	1.32316	0.554722	0.420865	0.736191
42	0.509304	0.469898	0.514435	1.34932	1.322	0.550856	0.422286	0.735807
42.33	0.510708	0.473465	0.521331	1.36243	1.33653	0.549459	0.418084	0.733393
42.67	0.513909	0.473408	0.519106	1.37218	1.3297	0.552663	0.419419	0.736234
43	0.51497	0.472801	0.513699	1.3704	1.33144	0.551362	0.418155	0.734774
43.33	0.513016	0.476858	0.518787	1.37611	1.33425	0.547257	0.42317	0.743335
43.67	0.519007	0.478632	0.523002	1.38171	1.33864	0.54999	0.418983	0.745853
44	0.514559	0.478606	0.517368	1.38348	1.34716	0.545951	0.417319	0.743559
44.33	0.519875	0.479607	0.516233	1.38685	1.35055	0.546722	0.42203	0.737866
44.67	0.522327	0.477088	0.506309	1.39523	1.34403	0.550567	0.420063	0.742948
45	0.519707	0.476757	0.519208	1.39905	1.34385	0.552282	0.422498	0.746628
45.33	0.525905	0.478896	0.511837	1.40737	1.358	0.548038	0.420868	0.753804
45.67	0.519416	0.479759	0.516328	1.40757	1.35631	0.545765	0.419788	0.749211
46	0.529118	0.476887	0.517834	1.41963	1.36052	0.545097	0.425806	0.756607
46.33	0.520649	0.478845	0.513172	1.40474	1.37253	0.546333	0.422561	0.75463
46.67	0.525765	0.481315	0.515803	1.41173	1.36294	0.54425	0.421176	0.758043
47	0.531209	0.480735	0.511344	1.41841	1.37698	0.545023	0.41962	0.762806
47.33	0.53455	0.483064	0.515408	1.43895	1.3738	0.544075	0.420567	0.759019
47.67	0.530937	0.482561	0.513973	1.44485	1.37375	0.545984	0.419824	0.757101
48	0.536203	0.488695	0.512026	1.42644	1.37471	0.545291	0.421342	0.763669
48.33	0.530036	0.488763	0.51078	1.42824	1.37376	0.546679	0.416737	0.759733
48.67	0.537583	0.482961	0.511817	1.44472	1.3809	0.546496	0.421542	0.767309
49	0.541242	0.481978	0.511556	1.44484	1.3979	0.548564	0.418864	0.770596
49.33	0.540591	0.485407	0.511631	1.46424	1.39691	0.544488	0.419226	0.764864
49.67	0.539083	0.491274	0.508885	1.44687	1.39193	0.543758	0.420849	0.766324
50	0.540119	0.486526	0.513139	1.46157	1.39831	0.541094	0.421205	0.774256
50.33	0.540287	0.4832	0.510984	1.46046	1.39342	0.541629	0.419724	0.772079
50.67	0.542801	0.483677	0.507867	1.479	1.40328	0.549847	0.418689	0.77353
51	0.543237	0.484525	0.505266	1.4664	1.3885	0.538596	0.421276	0.773683
51.33	0.549185	0.489631	0.510144	1.47266	1.41145	0.543568	0.420443	0.782975
51.67	0.545751	0.4867	0.506681	1.48765	1.42456	0.540538	0.421342	0.77722
52	0.5495	0.494884	0.506714	1.4791	1.40483	0.544289	0.421963	0.776756
52.33	0.545084	0.486812	0.505972	1.50092	1.40762	0.541745	0.422258	0.778373
52.67	0.550568	0.487746	0.511597	1.49185	1.4078	0.549064	0.422477	0.787943
53	0.548907	0.488525	0.502949	1.48967	1.39025	0.540153	0.420468	0.780469
53.33	0.547658	0.494765	0.505059	1.50409	1.39996	0.541738	0.420467	0.779928
53.67	0.552109	0.495011	0.506983	1.49828	1.41536	0.537374	0.423508	0.788968
54	0.556874	0.49317	0.508136	1.51512	1.42618	0.540927	0.423654	0.788049
54.33	0.552572	0.496108	0.507641	1.50914	1.41419	0.541629	0.422243	0.792591
54.67	0.55822	0.491789	0.505993	1.50493	1.41455	0.541093	0.42254	0.794864
55	0.556718	0.496388	0.508891	1.52651	1.43096	0.540764	0.42251	0.794025
55.33	0.559479	0.494319	0.506889	1.52101	1.43524	0.535974	0.423518	0.795578
55.67	0.560316	0.492753	0.503752	1.52687	1.43823	0.533596	0.422693	0.786924
56	0.561162	0.491148	0.505247	1.51794	1.43094	0.53689	0.423376	0.798074
56.33	0.564765	0.495178	0.506237	1.52465	1.41805	0.540009	0.424949	0.801047
56.67	0.560398	0.497056	0.508188	1.54852	1.4276	0.534728	0.410493	0.794121
57	0.563344	0.494718	0.503056	1.55287	1.43939	0.535901	0.420855	0.80101
57.33	0.560741	0.49456	0.507936	1.54718	1.44045	0.521857	0.419816	0.804847
57.67	0.565612	0.496912	0.506048	1.5467	1.44271	0.530593	0.441221	0.805324
58	0.571715	0.498885	0.504652	1.55442	1.448	0.53418	0.422811	0.807543
58.33	0.576294	0.492727	0.502946	1.56015	1.43927	0.533677	0.41033	0.815602
58.67	0.570166	0.499512	0.507882	1.55663	1.45007	0.533453	0.418155	0.802769
59	0.574002	0.497139	0.505615	1.57104	1.45239	0.531005	0.426695	0.807355
59.33	0.574797	0.501612	0.499609	1.56965	1.44916	0.53548	0.425306	0.807787
59.67	0.571634	0.500179	0.504461	1.56239	1.45266	0.533797	0.42395	0.804465
60	0.580109	0.502512	0.500098	1.57427	1.44319	0.531032	0.423428	0.813188
60.33	0.584707	0.50464	0.505461	1.59341	1.45309	0.525261	0.423511	0.814626
60.67	0.580474	0.502966	0.50681	1.58051	1.47736	0.531002	0.42377	0.812343
61	0.580051	0.507334	0.501314	1.58513	1.46298	0.530555	0.420218	0.812445
61.33	0.583978	0.502732	0.503734	1.58201	1.46133	0.531782	0.419789	0.809138
61.67	0.58463	0.502356	0.500339	1.59527	1.46408	0.52692	0.422421	0.809183
62	0.584321	0.504565	0.502338	1.59435	1.46896	0.532371	0.425608	0.816505
62.33	0.584406	0.502132	0.497068	1.60276	1.46788	0.535473	0.407732	0.824821
62.67	0.580717	0.502538	0.502722	1.59902	1.47812	0.534291	0.424945	0.822254
63	0.588799	0.507394	0.501718	1.59797	1.47646	0.522236	0.426853	0.818931
63.33	0.585645	0.509821	0.503767	1.59952	1.47596	0.529428	0.427636	0.815701
63.67	0.59309	0.518077	0.497942	1.60064	1.46637	0.530942	0.424057	0.82087
64	0.592512	0.505753	0.498982	1.61257	1.46924	0.525697	0.421948	0.820626
64.33	0.593237	0.503088	0.504137	1.6012	1.47227	0.527586	0.421264	0.836138
64.67	0.597582	0.506382	0.498737	1.622	1.48482	0.526921	0.421368	0.825818
65	0.598946	0.510197	0.501723	1.60536	1.47504	0.520282	0.42014	0.826895
65.33	0.593934	0.510557	0.49716	1.63179	1.48578	0.528593	0.419533	0.834764
65.67	0.597384	0.508044	0.496873	1.63353	1.48861	0.532276	0.423513	0.833521
66	0.598448	0.510474	0.494332	1.63955	1.47644	0.530867	0.419605	0.824398
66.33	0.600882	0.514616	0.496837	1.62369	1.47844	0.526026	0.422122	0.828643
66.67	0.598884	0.514444	0.495236	1.63817	1.48701	0.535668	0.424352	0.839112
67	0.60049	0.512488	0.496689	1.6323	1.4839	0.525721	0.427526	0.847987
67.33	0.604542	0.513806	0.496922	1.64364	1.48914	0.506796	0.424948	0.843757
67.67	0.611371	0.511577	0.496635	1.64061	1.48493	0.527692	0.426199	0.839017
68	0.605118	0.514132	0.496923	1.65752	1.50027	0.527125	0.426945	0.841225
68.33	0.605351	0.515258	0.498113	1.63241	1.50985	0.5311	0.422394	0.837125
68.67	0.609385	0.517408	0.500874	1.65537	1.48581	0.531728	0.424895	0.840769
69	0.616736	0.515047	0.493482	1.66281	1.49511	0.515198	0.422873	0.838543
69.33	0.611268	0.516536	0.502701	1.66271	1.50891	0.528815	0.424257	0.852562
69.67	0.609353	0.515893	0.494543	1.6692	1.49918	0.527739	0.421996	0.835179
70	0.617148	0.518038	0.490791	1.66196	1.50266	0.524396	0.408696	0.850429
70.33	0.613339	0.51347	0.498816	1.66696	1.50113	0.52658	0.402658	0.848141
70.67	0.61767	0.519133	0.493667	1.68504	1.50435	0.526953	0.427949	0.857765
71	0.620178	0.519353	0.493746	1.66723	1.50633	0.527895	0.42348	0.845328
71.33	0.621457	0.517459	0.496184	1.67345	1.51069	0.522161	0.423483	0.849215
71.67	0.619782	0.520342	0.494516	1.69558	1.51983	0.524279	0.423785	0.846805
72	0.622417	0.517304	0.494817	1.68623	1.50509	0.526161	0.424801	0.858901
72.33	0.628212	0.526681	0.493352	1.67319	1.50871	0.522708	0.430402	0.861617
72.67	0.625661	0.531301	0.495553	1.69466	1.50679	0.523579	0.42595	0.862636
73	0.623835	0.532969	0.486399	1.70005	1.51636	0.526846	0.422575	0.851779
73.33	0.628726	0.524643	0.492314	1.69874	1.52102	0.523858	0.423055	0.867794
73.67	0.625871	0.527258	0.496651	1.70568	1.51864	0.519841	0.44571	0.856487
74	0.633363	0.526739	0.493161	1.69908	1.5127	0.521574	0.427862	0.860188
74.33	0.636066	0.52365	0.495663	1.71387	1.52202	0.522638	0.425157	0.863409
74.67	0.640623	0.526352	0.494959	1.71518	1.52161	0.528808	0.427633	0.864899
75	0.636807	0.524076	0.493715	1.69915	1.52188	0.522812	0.42608	0.86183
75.33	0.643319	0.524788	0.492656	1.72573	1.52561	0.518811	0.425456	0.863951
75.67	0.637899	0.535072	0.488824	1.74078	1.52436	0.526036	0.427391	0.862682
76	0.639479	0.532218	0.490578	1.72314	1.5335	0.51939	0.42731	0.856276
76.33	0.643036	0.531743	0.493836	1.74366	1.52924	0.521422	0.430964	0.864923
76.67	0.644193	0.532888	0.496676	1.73774	1.53349	0.520446	0.425311	0.86897
77	0.645133	0.529171	0.495492	1.73823	1.53437	0.527241	0.423355	0.865555
77.33	0.639179	0.530887	0.493181	1.73738	1.53908	0.515508	0.424201	0.877705
77.67	0.64885	0.531191	0.490432	1.74735	1.52753	0.523146	0.426298	0.873245
78	0.647258	0.531985	0.49323	1.73414	1.54181	0.520188	0.42854	0.884103
78.33	0.651873	0.53658	0.492773	1.75224	1.5313	0.520896	0.423585	0.87137
78.67	0.654739	0.533731	0.493858	1.75141	1.54219	0.517787	0.427039	0.876426
79	0.650912	0.531781	0.495398	1.76162	1.53164	0.521677	0.426259	0.875819
79.33	0.65057	0.533896	0.491445	1.75307	1.54451	0.517263	0.425068	0.880983
79.67	0.656573	0.533236	0.488298	1.76652	1.54001	0.519674	0.427741	0.880002
80	0.655918	0.536704	0.491521	1.7592	1.54673	0.517188	0.401196	0.875605
80.33	0.659	0.540906	0.485537	1.75449	1.54354	0.522443	0.400935	0.876129
80.67	0.660303	0.53844	0.491845	1.75869	1.54022	0.522239	0.427467	0.88626
81	0.662251	0.538264	0.488112	1.78425	1.54594	0.515103	0.421507	0.896413
81.33	0.665193	0.539389	0.489175	1.78893	1.54389	0.522384	0.421108	0.886918
81.67	0.661716	0.547466	0.492016	1.78142	1.54647	0.51667	0.427596	0.886994
82	0.664446	0.537156	0.489182	1.77574	1.55321	0.515094	0.427068	0.88585
82.33	0.664616	0.548066	0.490149	1.76631	1.54974	0.518833	0.42871	0.888086
82.67	0.669577	0.540949	0.487823	1.77751	1.55381	0.518078	0.405427	0.89385
83	0.667909	0.540394	0.487852	1.77558	1.5594	0.515816	0.42666	0.889876
83.33	0.670001	0.536946	0.487233	1.80271	1.5618	0.518002	0.426164	0.89088
83.67	0.669624	0.540553	0.490934	1.79327	1.5489	0.518188	0.426528	0.898093
84	0.66995	0.541451	0.488041	1.79893	1.54607	0.517931	0.428785	0.895356
84.33	0.674566	0.540884	0.487746	1.78287	1.55167	0.518374	0.427169	0.892525
84.67	0.671529	0.547429	0.487644	1.79614	1.55821	0.514488	0.426935	0.893282
85	0.670119	0.54528	0.490768	1.80266	1.5508	0.515102	0.427255	0.900116
85.33	0.696164	0.545849	0.484145	1.80329	1.55364	0.513794	0.427392	0.901416
85.67	0.679101	0.541746	0.488023	1.82351	1.55048	0.519213	0.426856	0.911111
86	0.683472	0.546854	0.489235	1.81584	1.55863	0.519236	0.432192	0.89784
86.33	0.681972	0.547903	0.49041	1.82599	1.57445	0.509358	0.395435	0.901779
86.67	0.680827	0.543037	0.491785	1.81924	1.57435	0.513956	0.426668	0.917015
87	0.683738	0.546409	0.484149	1.83274	1.55669	0.516846	0.428161	0.895018
87.33	0.682167	0.547998	0.483754	1.81277	1.57884	0.513015	0.426211	0.901883
87.67	0.689889	0.545842	0.486609	1.82539	1.56276	0.516873	0.418829	0.8997
88	0.687728	0.55087	0.487631	1.82222	1.56794	0.517524	0.426442	0.901715
88.33	0.695716	0.549991	0.485804	1.8219	1.57167	0.516074	0.431759	0.918827
88.67	0.693107	0.548127	0.485378	1.82443	1.57502	0.512878	0.426809	0.901249
89	0.69776	0.555093	0.487555	1.832	1.57605	0.517379	0.443999	0.90433
89.33	0.696169	0.545805	0.487966	1.85566	1.5698	0.518044	0.429858	0.903629
89.67	0.696225	0.546829	0.483677	1.84361	1.58492	0.516465	0.430391	0.909393

## Sheet: Fig3 panel D
	slope measurement	prep1	prep2	prep3	prep4	average	std. dev.
PBP1B	30-50 min	0.0166803	0.0436141	0.00295852	0.0131102
+LpoB	0-10 min	0.183754	0.45761	0.0331255	0.118904
	relative slope	11.0162	10.4923	11.1967	9.06955	10.4437	0.963562

## Sheet: Fig3 panel E
time (min)	AbPBP1B	Amp	Moe	LpoP	LpoP/Moe	LpoP/Amp
0	0.476456	0.473936	0.497767	0.706142	0.587513	0.586094
0.33	0.47709	0.474911	0.504396	0.721963	0.594672	0.597877
0.67	0.480114	0.47692	0.502828	0.736075	0.600966	0.604746
1	0.478778	0.473223	0.501017	0.746809	0.598349	0.615337
1.33	0.477604	0.47425	0.498875	0.755196	0.597209	0.626929
1.67	0.476308	0.468244	0.49428	0.766873	0.596888	0.633977
2	0.480652	0.474154	0.493646	0.779513	0.599422	0.643202
2.33	0.48191	0.473617	0.493332	0.782097	0.603552	0.65152
2.67	0.481453	0.475245	0.492742	0.800752	0.601011	0.6581
3	0.48673	0.47504	0.491655	0.805416	0.601151	0.66862
3.33	0.483628	0.476714	0.492645	0.814668	0.599352	0.67829
3.67	0.486756	0.48007	0.48988	0.83159	0.602689	0.682709
4	0.487805	0.479974	0.488008	0.835099	0.598528	0.689833
4.33	0.491018	0.479335	0.48726	0.850004	0.598613	0.701198
4.67	0.491188	0.477091	0.488478	0.857875	0.599361	0.711651
5	0.495331	0.481019	0.483998	0.869179	0.604282	0.719429
5.33	0.494039	0.47623	0.48178	0.871738	0.599361	0.725284
5.67	0.499765	0.484343	0.482519	0.885323	0.597229	0.735014
6	0.502068	0.485068	0.483572	0.897311	0.599432	0.743845
6.33	0.50272	0.481399	0.480366	0.904926	0.597767	0.750266
6.67	0.504091	0.487399	0.478898	0.918119	0.597684	0.760999
7	0.508643	0.490238	0.47837	0.927846	0.603207	0.76898
7.33	0.512015	0.489921	0.477153	0.930001	0.599926	0.773019
7.67	0.510623	0.489877	0.47832	0.940158	0.596494	0.781829
8	0.517895	0.490998	0.474111	0.957378	0.591227	0.7899
8.33	0.517238	0.495568	0.47513	0.962952	0.598037	0.802048
8.67	0.525576	0.492693	0.475246	0.972501	0.593862	0.803356
9	0.527472	0.496969	0.474795	0.987857	0.591477	0.812736
9.33	0.530423	0.498378	0.474312	1.0006	0.589179	0.827144
9.67	0.533492	0.50236	0.470727	1.00508	0.592453	0.833561
10	0.534835	0.502838	0.473675	1.01151	0.588948	0.842644
10.33	0.541627	0.504758	0.472029	1.01754	0.587242	0.845724
10.67	0.541294	0.505292	0.472511	1.03443	0.584364	0.856625
11	0.546526	0.505818	0.466909	1.04189	0.584138	0.864057
11.33	0.550497	0.507724	0.469842	1.05351	0.582402	0.871004
11.67	0.55558	0.510291	0.46793	1.06176	0.579831	0.875349
12	0.55566	0.5139	0.470406	1.07323	0.579736	0.883754
12.33	0.561807	0.513961	0.472103	1.08901	0.576445	0.899366
12.67	0.565541	0.52017	0.467392	1.09386	0.576743	0.900822
13	0.567425	0.518702	0.470364	1.09998	0.579934	0.913779
13.33	0.57143	0.5223	0.464792	1.11491	0.572922	0.920056
13.67	0.574379	0.527317	0.466904	1.12928	0.571049	0.927072
14	0.575703	0.523786	0.468402	1.13762	0.572692	0.930615
14.33	0.579168	0.527801	0.468025	1.14436	0.568914	0.939597
14.67	0.584692	0.529392	0.466424	1.15414	0.566795	0.947229
15	0.58971	0.533168	0.467498	1.16596	0.563665	0.958583
15.33	0.593697	0.537621	0.46771	1.16757	0.568344	0.962465
15.67	0.594791	0.537458	0.46619	1.17674	0.56775	0.970306
16	0.603461	0.53946	0.466786	1.19767	0.56577	0.973011
16.33	0.602856	0.546364	0.464513	1.20851	0.560987	0.990415
16.67	0.610994	0.541864	0.465596	1.21006	0.558906	0.991309
17	0.606133	0.549015	0.465333	1.21944	0.558545	0.993512
17.33	0.615814	0.546886	0.46363	1.23117	0.553723	1.00831
17.67	0.620873	0.55313	0.463996	1.24289	0.552638	1.0222
18	0.620858	0.554128	0.46547	1.24858	0.55462	1.02144
18.33	0.624327	0.552425	0.46356	1.25617	0.551076	1.03032
18.67	0.632299	0.555129	0.464725	1.27004	0.55141	1.04242
19	0.634321	0.561975	0.468716	1.28519	0.552486	1.04112
19.33	0.639138	0.563508	0.462859	1.28027	0.54648	1.05326
19.67	0.645604	0.563866	0.463329	1.29902	0.547267	1.06006
20	0.644351	0.56474	0.464598	1.3033	0.545081	1.06608
20.33	0.654065	0.568599	0.46262	1.32467	0.543344	1.07148
20.67	0.654776	0.572524	0.458684	1.33236	0.545413	1.07918
21	0.660699	0.573433	0.461855	1.33425	0.542521	1.08862
21.33	0.657986	0.573553	0.461511	1.35497	0.541836	1.09487
21.67	0.663197	0.577779	0.464663	1.36011	0.542561	1.09545
22	0.667433	0.580603	0.460359	1.37015	0.536654	1.11156
22.33	0.671875	0.583904	0.462071	1.37532	0.538793	1.11469
22.67	0.675547	0.587602	0.460278	1.37905	0.538252	1.11981
23	0.68114	0.590768	0.463898	1.38512	0.534453	1.12837
23.33	0.681447	0.590716	0.463244	1.39316	0.528809	1.13444
23.67	0.687009	0.589777	0.45877	1.40441	0.533038	1.14663
24	0.687836	0.594391	0.462453	1.41229	0.529448	1.14693
24.33	0.687555	0.600935	0.463236	1.41441	0.52813	1.15431
24.67	0.694521	0.599091	0.459878	1.42962	0.53097	1.16865
25	0.701592	0.606753	0.460568	1.44356	0.526633	1.17127
25.33	0.703463	0.606444	0.459986	1.44959	0.525203	1.17478
25.67	0.700269	0.60617	0.464161	1.44426	0.524756	1.18663
26	0.705555	0.608799	0.457639	1.46776	0.524138	1.18481
26.33	0.707764	0.610757	0.460911	1.47008	0.518592	1.19457
26.67	0.719126	0.612467	0.463246	1.47763	0.52029	1.19889
27	0.715723	0.613845	0.462276	1.4923	0.519136	1.2125
27.33	0.726241	0.616822	0.461506	1.49719	0.518264	1.20812
27.67	0.720073	0.621754	0.46303	1.49117	0.516816	1.21848
28	0.731039	0.623508	0.460011	1.49851	0.516755	1.22861
28.33	0.729989	0.6236	0.459211	1.51314	0.516974	1.22914
28.67	0.73508	0.624903	0.460084	1.51195	0.514608	1.24247
29	0.737512	0.627767	0.461316	1.52517	0.517761	1.23969
29.33	0.740297	0.631992	0.459599	1.52411	0.509375	1.24878
29.67	0.746064	0.632993	0.460395	1.53214	0.512828	1.25424
30	0.743345	0.634546	0.462881	1.54687	0.511048	1.25669
30.33	0.751677	0.634538	0.463609	1.55414	0.509033	1.26059
30.67	0.751618	0.63845	0.460942	1.56213	0.509118	1.25663
31	0.753927	0.642805	0.461344	1.56867	0.507232	1.26791
31.33	0.763546	0.644641	0.460552	1.55848	0.506187	1.26909
31.67	0.762187	0.646607	0.458431	1.57843	0.507877	1.27509
32	0.765584	0.64943	0.461027	1.59006	0.507626	1.28283
32.33	0.770052	0.649739	0.458456	1.58991	0.509178	1.28793
32.67	0.774998	0.651315	0.461794	1.60037	0.502731	1.29834
33	0.777089	0.656444	0.460631	1.59461	0.505572	1.29173
33.33	0.777531	0.654295	0.460394	1.6029	0.505082	1.3045
33.67	0.777149	0.658931	0.461095	1.60854	0.501012	1.29826
34	0.783924	0.655217	0.460361	1.61148	0.502233	1.31079
34.33	0.781279	0.664182	0.461082	1.61388	0.501562	1.31006
34.67	0.791182	0.665193	0.459715	1.61441	0.503322	1.31841
35	0.792017	0.671014	0.457973	1.63736	0.49852	1.32325
35.33	0.796541	0.668317	0.460281	1.63255	0.496253	1.33386
35.67	0.796632	0.672694	0.460708	1.64136	0.499401	1.34035
36	0.800041	0.671979	0.461858	1.63636	0.497358	1.33722
36.33	0.805782	0.674877	0.459442	1.64561	0.49664	1.34167
36.67	0.801071	0.677243	0.459566	1.6489	0.495615	1.34275
37	0.806031	0.675183	0.460316	1.64987	0.49646	1.34606
37.33	0.813062	0.677367	0.458118	1.65886	0.49355	1.34804
37.67	0.814849	0.680552	0.458693	1.66975	0.492424	1.35678
38	0.81587	0.686224	0.45927	1.66755	0.49137	1.3597
38.33	0.816938	0.683702	0.461435	1.66268	0.490962	1.36164
38.67	0.81978	0.685525	0.459052	1.67187	0.490057	1.36886
39	0.822096	0.689105	0.459192	1.67485	0.492336	1.36333
39.33	0.825847	0.689962	0.45898	1.68228	0.490297	1.38039
39.67	0.828965	0.694065	0.457553	1.6895	0.489631	1.37046
40	0.830227	0.691197	0.459101	1.70505	0.490472	1.37753
40.33	0.834134	0.695131	0.45952	1.69337	0.484711	1.38007
40.67	0.837042	0.696175	0.459536	1.69576	0.486643	1.39154
41	0.840676	0.700087	0.459256	1.69634	0.48677	1.37704
41.33	0.842073	0.702785	0.46014	1.70174	0.482983	1.39187
41.67	0.838951	0.702678	0.461236	1.70933	0.48627	1.39279
42	0.842623	0.704173	0.457744	1.71272	0.487348	1.38627
42.33	0.84662	0.703257	0.461636	1.71727	0.485216	1.39708
42.67	0.847954	0.718407	0.45968	1.7173	0.481728	1.39781
43	0.853769	0.710843	0.458736	1.73112	0.483621	1.39224
43.33	0.854076	0.709892	0.458509	1.72198	0.484096	1.39449
43.67	0.853847	0.7142	0.459712	1.72683	0.479293	1.39616
44	0.857704	0.717601	0.456734	1.72771	0.482093	1.40444
44.33	0.858634	0.721962	0.457072	1.73242	0.480712	1.40353
44.67	0.861412	0.719846	0.458444	1.73797	0.478892	1.41094
45	0.868582	0.719962	0.458393	1.73522	0.48036	1.40742
45.33	0.86695	0.720843	0.456458	1.73395	0.47513	1.40571
45.67	0.870042	0.724952	0.458589	1.75182	0.475072	1.41249
46	0.873866	0.726253	0.458054	1.7452	0.477717	1.40792
46.33	0.872258	0.727193	0.455078	1.73698	0.475226	1.41973
46.67	0.876417	0.731206	0.456447	1.74089	0.477435	1.41039
47	0.881682	0.733147	0.457341	1.73981	0.475902	1.40948
47.33	0.882893	0.729329	0.457311	1.75897	0.475062	1.41896
47.67	0.892172	0.735936	0.456888	1.75454	0.476855	1.41984
48	0.884895	0.736079	0.457675	1.76629	0.476084	1.42267
48.33	0.88715	0.733558	0.45776	1.76443	0.473864	1.42551
48.67	0.88578	0.741604	0.458231	1.75735	0.476623	1.42715
49	0.888325	0.740723	0.458625	1.76144	0.474579	1.42342
49.33	0.891938	0.744657	0.457081	1.76444	0.472387	1.42559
49.67	0.893492	0.743338	0.457996	1.76107	0.474602	1.42105
50	0.898458	0.744652	0.457545	1.77417	0.476873	1.41837
50.33	0.900076	0.743245	0.457131	1.77854	0.47212	1.42635
50.67	0.905287	0.745987	0.456521	1.76558	0.472162	1.42104
51	0.905161	0.749828	0.459285	1.76956	0.471106	1.42698
51.33	0.904707	0.750546	0.455375	1.77789	0.468961	1.42946
51.67	0.904061	0.750072	0.456784	1.7748	0.471804	1.42703
52	0.911036	0.756336	0.453181	1.77614	0.469339	1.43424
52.33	0.906833	0.758969	0.456702	1.78241	0.46835	1.43051
52.67	0.907515	0.755725	0.456154	1.77786	0.473418	1.42262
53	0.917364	0.757988	0.457137	1.78172	0.466294	1.43568
53.33	0.915162	0.757487	0.454857	1.78172	0.466565	1.44082
53.67	0.917449	0.759978	0.456044	1.79391	0.466938	1.43696
54	0.918995	0.759776	0.45488	1.80102	0.467038	1.43261
54.33	0.923573	0.762203	0.456105	1.78813	0.470715	1.43846
54.67	0.924345	0.757385	0.458537	1.78967	0.466794	1.43546
55	0.927039	0.763955	0.456661	1.80063	0.467154	1.43655
55.33	0.927728	0.76709	0.456851	1.80301	0.468404	1.43891
55.67	0.931435	0.764773	0.456313	1.7992	0.463854	1.4453
56	0.931987	0.769595	0.45664	1.79674	0.464534	1.4387
56.33	0.934011	0.766037	0.456438	1.78708	0.463241	1.43728
56.67	0.940194	0.767535	0.457638	1.80491	0.464695	1.44006
57	0.934192	0.776793	0.454233	1.79486	0.462742	1.42876
57.33	0.936659	0.774752	0.456151	1.79616	0.463483	1.44228
57.67	0.944549	0.772887	0.454778	1.78789	0.464021	1.43473
58	0.93683	0.775069	0.457641	1.79922	0.462324	1.44355
58.33	0.940766	0.772837	0.455765	1.7928	0.461125	1.44682
58.67	0.944236	0.772932	0.460245	1.803	0.461107	1.43998
59	0.946417	0.780431	0.455323	1.80006	0.462006	1.44424
59.33	0.951124	0.775518	0.458652	1.80136	0.461477	1.43024
59.67	0.954812	0.782756	0.458178	1.8138	0.461124	1.44466

## Sheet: Fig3 panel F
	slope measurement	prep1-meas1	prep1-meas2	prep2-meas1	prep2-meas2	average	std. dev.
AbPBP1B	15-25 min	0.0150505	0.0115285	0.00670392	0.00616999
+LpoP	0-10 min	0.0408354	0.0347216	0.015271	0.0148242
AbPBP1B						1	0.0981809
+LpoP	relative slope	2.71322	3.01179	2.27791	2.40263	2.60139	0.329178

## Sheet: Fig3 panel G
time (min)	AbPBP1B	Amp	Moe	LpoP	LpoP/Amp	LpoP/Moe
0	0.315243	0.294646	0.366234	0.330431	0.324808	0.368903
0.33	0.290957	0.298391	0.365436	0.307921	0.317791	0.370377
0.67	0.291101	0.294945	0.368748	0.31618	0.316072	0.372347
1	0.288886	0.294517	0.371472	0.31779	0.317689	0.370347
1.33	0.290855	0.294204	0.363881	0.308748	0.323397	0.370792
1.67	0.289279	0.294974	0.367369	0.316293	0.321254	0.374816
2	0.289143	0.293964	0.362936	0.315081	0.322127	0.371568
2.33	0.287942	0.291998	0.359808	0.317225	0.32847	0.368736
2.67	0.288919	0.292568	0.356538	0.319874	0.328283	0.367489
3	0.288193	0.292735	0.356181	0.31874	0.326893	0.36857
3.33	0.290276	0.289735	0.356708	0.322559	0.331975	0.366346
3.67	0.288183	0.292364	0.349906	0.323433	0.331703	0.366622
4	0.290566	0.290121	0.349443	0.324546	0.338592	0.36692
4.33	0.291507	0.289427	0.34933	0.325064	0.336868	0.365901
4.67	0.289689	0.290305	0.348464	0.329553	0.339042	0.361921
5	0.288545	0.294031	0.346112	0.331518	0.342741	0.361628
5.33	0.288736	0.289137	0.347326	0.333797	0.343648	0.360053
5.67	0.288967	0.289513	0.342024	0.336447	0.34568	0.360946
6	0.289494	0.289336	0.340132	0.337881	0.349235	0.358461
6.33	0.286744	0.289404	0.339761	0.339435	0.351861	0.357598
6.67	0.287748	0.290158	0.338897	0.34476	0.353353	0.355442
7	0.28652	0.288704	0.33606	0.346788	0.356142	0.356074
7.33	0.287263	0.28884	0.333981	0.348322	0.358553	0.353399
7.67	0.289797	0.290146	0.332701	0.351824	0.363606	0.355514
8	0.28916	0.289759	0.332763	0.353197	0.366811	0.353364
8.33	0.288086	0.288046	0.330721	0.355141	0.366278	0.352561
8.67	0.288721	0.291995	0.331339	0.358354	0.369164	0.347293
9	0.289459	0.290177	0.327886	0.361786	0.373487	0.347696
9.33	0.288857	0.289676	0.328635	0.365213	0.377665	0.343453
9.67	0.28922	0.290358	0.324469	0.365319	0.374859	0.347394
10	0.287432	0.289691	0.32285	0.369195	0.381503	0.343228
10.33	0.287484	0.288247	0.32364	0.371043	0.383639	0.344646
10.67	0.290364	0.291474	0.321763	0.376582	0.385432	0.343743
11	0.286852	0.289697	0.320182	0.377312	0.388986	0.341737
11.33	0.287015	0.289169	0.319015	0.38217	0.394402	0.339204
11.67	0.288473	0.287724	0.32043	0.382553	0.397346	0.340819
12	0.288641	0.288643	0.317511	0.38871	0.400367	0.336207
12.33	0.287803	0.288184	0.317841	0.393628	0.403893	0.338251
12.67	0.289547	0.289932	0.317417	0.39147	0.405343	0.335905
13	0.289545	0.288673	0.315869	0.397273	0.414268	0.331977
13.33	0.288996	0.290085	0.315469	0.402197	0.413139	0.333767
13.67	0.287304	0.288888	0.311383	0.40483	0.417284	0.331843
14	0.289949	0.289508	0.31643	0.408773	0.420209	0.328575
14.33	0.288595	0.289677	0.31358	0.412608	0.421936	0.330724
14.67	0.287781	0.288934	0.310499	0.415387	0.428017	0.330658
15	0.292115	0.291152	0.311893	0.418128	0.427698	0.329187
15.33	0.290587	0.288718	0.307494	0.423664	0.433177	0.328237
15.67	0.289948	0.288696	0.309643	0.42452	0.438283	0.327505
16	0.290474	0.29057	0.307868	0.429872	0.443437	0.324271
16.33	0.291574	0.290158	0.30779	0.435014	0.447899	0.322705
16.67	0.291463	0.290285	0.307141	0.435784	0.447654	0.323018
17	0.288535	0.290016	0.307309	0.442113	0.448507	0.325217
17.33	0.292589	0.290107	0.307099	0.442775	0.454414	0.324151
17.67	0.293016	0.289074	0.307159	0.450325	0.460584	0.319885
18	0.292349	0.288254	0.306763	0.451984	0.463504	0.319328
18.33	0.293679	0.28907	0.304525	0.453796	0.464791	0.319919
18.67	0.291717	0.289185	0.307211	0.458451	0.468644	0.318517
19	0.29259	0.287707	0.302462	0.463982	0.470212	0.321262
19.33	0.293039	0.2893	0.303529	0.468093	0.477214	0.317738
19.67	0.294626	0.290629	0.301959	0.468861	0.479964	0.317467
20	0.293801	0.288215	0.302067	0.476508	0.483618	0.315809
20.33	0.296141	0.293082	0.302348	0.479166	0.489392	0.316627
20.67	0.293831	0.289299	0.301901	0.484282	0.492317	0.317938
21	0.294873	0.291697	0.300981	0.482783	0.4958	0.318983
21.33	0.29648	0.290446	0.300543	0.489135	0.498775	0.318271
21.67	0.296006	0.292528	0.299488	0.495716	0.50002	0.313426
22	0.29955	0.291433	0.298727	0.497347	0.506861	0.315107
22.33	0.298458	0.291882	0.301689	0.502514	0.520687	0.31416
22.67	0.298287	0.294067	0.301209	0.51093	0.519034	0.314927
23	0.298824	0.294561	0.298629	0.511746	0.51668	0.314958
23.33	0.301192	0.293038	0.300053	0.515416	0.520871	0.311982
23.67	0.301782	0.290696	0.299264	0.517639	0.529268	0.311409
24	0.299249	0.294222	0.298004	0.523889	0.532555	0.312446
24.33	0.304341	0.290927	0.298104	0.52847	0.530411	0.309655
24.67	0.303289	0.292096	0.297317	0.530954	0.535458	0.312292
25	0.302791	0.293157	0.29852	0.532872	0.538788	0.309164
25.33	0.303643	0.292912	0.297007	0.534114	0.538619	0.307884
25.67	0.303854	0.2906	0.297879	0.540802	0.550497	0.309179
26	0.303686	0.292392	0.295451	0.543937	0.548103	0.307454
26.33	0.306284	0.29517	0.295725	0.551329	0.554383	0.311812
26.67	0.30533	0.293375	0.29521	0.552339	0.55683	0.307943
27	0.307634	0.294067	0.297111	0.559268	0.561833	0.307028
27.33	0.306728	0.293026	0.297861	0.561426	0.567056	0.306672
27.67	0.309319	0.293758	0.294548	0.565999	0.567638	0.306845
28	0.308604	0.295154	0.296254	0.571673	0.57013	0.306679
28.33	0.310271	0.293938	0.293876	0.574622	0.575783	0.305618
28.67	0.306992	0.29364	0.293973	0.581766	0.579575	0.309061
29	0.311769	0.294865	0.295536	0.585284	0.583228	0.305053
29.33	0.312137	0.296937	0.29573	0.582712	0.592739	0.304348
29.67	0.312434	0.294387	0.295847	0.589984	0.587979	0.306351
30	0.314497	0.293794	0.294857	0.594489	0.58672	0.304857
30.33	0.315816	0.295842	0.292885	0.601405	0.595162	0.305545
30.67	0.314557	0.296017	0.294537	0.598413	0.59835	0.303872
31	0.315766	0.295189	0.293334	0.604515	0.606687	0.304026
31.33	0.3172	0.29819	0.294204	0.612296	0.605564	0.301372
31.67	0.318808	0.294489	0.292055	0.614064	0.609732	0.302801
32	0.318173	0.295191	0.293132	0.620069	0.607474	0.301351
32.33	0.320015	0.295178	0.293497	0.618387	0.612592	0.300741
32.67	0.321405	0.294796	0.291871	0.623267	0.619022	0.301557
33	0.321765	0.295965	0.294781	0.630582	0.617936	0.301861
33.33	0.322033	0.297274	0.292048	0.63671	0.61947	0.300191
33.67	0.322663	0.298684	0.293249	0.638529	0.624654	0.299715
34	0.32351	0.297418	0.291827	0.640658	0.622803	0.300302
34.33	0.327455	0.29652	0.291007	0.643615	0.632208	0.301601
34.67	0.326908	0.296849	0.29157	0.653785	0.637631	0.300081
35	0.327133	0.298984	0.29084	0.654681	0.638426	0.301019
35.33	0.330388	0.29791	0.290052	0.653558	0.644674	0.298927
35.67	0.327112	0.299902	0.290696	0.661351	0.643582	0.303585
36	0.330109	0.297925	0.29167	0.668551	0.646943	0.299894
36.33	0.329605	0.296885	0.291213	0.666472	0.647275	0.298266
36.67	0.331706	0.301178	0.292939	0.674608	0.65461	0.300613
37	0.331281	0.296115	0.291263	0.674718	0.654429	0.30017
37.33	0.332622	0.301613	0.290812	0.680544	0.656641	0.296618
37.67	0.332783	0.300122	0.289037	0.681721	0.664688	0.298111
38	0.337403	0.299371	0.29118	0.684888	0.669208	0.297177
38.33	0.335187	0.300633	0.29134	0.689056	0.672187	0.297422
38.67	0.337008	0.301651	0.290668	0.694484	0.672786	0.299064
39	0.338662	0.300378	0.290872	0.702669	0.670789	0.296373
39.33	0.338651	0.302864	0.289436	0.705364	0.67513	0.297212
39.67	0.339829	0.298606	0.290235	0.704726	0.682025	0.296156
40	0.341534	0.298451	0.289477	0.707995	0.680345	0.299363
40.33	0.341326	0.302142	0.289434	0.710477	0.683791	0.296895
40.67	0.343198	0.302086	0.287435	0.719891	0.686429	0.296656
41	0.343355	0.302732	0.28898	0.722166	0.689899	0.299147
41.33	0.344351	0.304147	0.287778	0.728047	0.68768	0.296558
41.67	0.346599	0.303233	0.287487	0.731757	0.696603	0.297955
42	0.345783	0.302712	0.290269	0.73195	0.683977	0.293362
42.33	0.351768	0.301126	0.28932	0.72596	0.696704	0.294576
42.67	0.349535	0.302802	0.288729	0.744048	0.703338	0.293133
43	0.353335	0.30392	0.289337	0.739813	0.701116	0.295293
43.33	0.349741	0.302694	0.288808	0.740377	0.706242	0.295615
43.67	0.351497	0.301252	0.289556	0.748485	0.706861	0.294592
44	0.354615	0.302613	0.288652	0.750144	0.710352	0.293154
44.33	0.353602	0.302745	0.28641	0.760699	0.714936	0.292872
44.67	0.358781	0.305056	0.287342	0.760986	0.718202	0.291655
45	0.355493	0.304025	0.286603	0.766409	0.726426	0.296123
45.33	0.36003	0.305152	0.287265	0.759387	0.717753	0.291711
45.67	0.358312	0.305721	0.287747	0.769262	0.713552	0.293839
46	0.361922	0.305908	0.288723	0.778153	0.722037	0.291562
46.33	0.361681	0.307088	0.28858	0.779388	0.712919	0.293315
46.67	0.363569	0.306256	0.287991	0.779595	0.737433	0.291325
47	0.365818	0.305263	0.288189	0.789122	0.732114	0.290211
47.33	0.363713	0.305233	0.287733	0.792226	0.733157	0.292117
47.67	0.365639	0.306296	0.287454	0.793228	0.73139	0.292519
48	0.369587	0.305046	0.288653	0.78764	0.738739	0.295448
48.33	0.365385	0.306791	0.288151	0.799543	0.738087	0.289889
48.67	0.370124	0.309611	0.286487	0.80489	0.747773	0.290548
49	0.370696	0.306893	0.289218	0.800566	0.742511	0.290039
49.33	0.370662	0.30466	0.288055	0.805093	0.743738	0.290868
49.67	0.372291	0.308462	0.285608	0.81651	0.752059	0.288966
50	0.37428	0.306684	0.287489	0.811248	0.749378	0.294279
50.33	0.375736	0.306206	0.28728	0.81656	0.747048	0.291822
50.67	0.375944	0.309866	0.286786	0.829009	0.761637	0.292355
51	0.374003	0.309905	0.28649	0.823442	0.753092	0.291342
51.33	0.379265	0.30876	0.285364	0.828933	0.751008	0.287548
51.67	0.378339	0.308059	0.288	0.827902	0.755001	0.289645
52	0.379831	0.311415	0.286685	0.836372	0.752062	0.293347
52.33	0.379575	0.310228	0.287504	0.843524	0.763372	0.288985
52.67	0.381779	0.309164	0.285408	0.839687	0.76487	0.288192
53	0.382076	0.308395	0.28629	0.847048	0.767836	0.290716
53.33	0.382101	0.309411	0.28798	0.850428	0.767993	0.290942
53.67	0.385702	0.310451	0.284821	0.846864	0.764488	0.288234
54	0.386709	0.308918	0.286557	0.858336	0.77118	0.288489
54.33	0.38551	0.312564	0.286294	0.861151	0.771549	0.29081
54.67	0.387324	0.309557	0.283675	0.862932	0.764328	0.288031
55	0.39032	0.311405	0.287728	0.863012	0.760989	0.288883
55.33	0.390525	0.312361	0.285686	0.862222	0.774213	0.287968
55.67	0.391522	0.31129	0.285794	0.865995	0.775805	0.290301
56	0.394406	0.311714	0.287743	0.877478	0.780299	0.290802
56.33	0.394001	0.310785	0.287499	0.867898	0.774356	0.286596
56.67	0.396079	0.312002	0.287155	0.869711	0.787466	0.290105
57	0.396733	0.312967	0.285557	0.885664	0.777224	0.287311
57.33	0.399031	0.313717	0.286621	0.89464	0.779763	0.288186
57.67	0.398989	0.312318	0.286983	0.890879	0.779674	0.287595
58	0.401342	0.311564	0.28559	0.892391	0.785254	0.287391
58.33	0.398722	0.312914	0.286781	0.899235	0.785481	0.285243
58.67	0.400811	0.314565	0.284158	0.896888	0.794665	0.288205
59	0.404271	0.312267	0.286123	0.895395	0.785812	0.284891
59.33	0.407386	0.314031	0.285951	0.904607	0.790722	0.287239
59.67	0.40316	0.313287	0.285365	0.903392	0.788549	0.287546
60.25	0.405612	0.314743	0.286419	0.898457	0.79923	0.286502
60.58	0.406293	0.31331	0.282931	0.915207	0.793465	0.283574
60.92	0.409689	0.314477	0.281759	0.913338	0.799045	0.285932
61.25	0.408835	0.313359	0.283223	0.916671	0.798439	0.284378
61.58	0.408574	0.313998	0.283331	0.909587	0.799763	0.285845
61.92	0.413133	0.315161	0.284762	0.916261	0.803652	0.288058
62.25	0.412883	0.316	0.283701	0.925601	0.802463	0.286446
62.58	0.412816	0.318191	0.285999	0.92254	0.801938	0.283931
62.92	0.413963	0.315312	0.284352	0.92841	0.798645	0.28522
63.25	0.413808	0.316721	0.286993	0.935904	0.797671	0.286138
63.58	0.413493	0.318854	0.286492	0.93128	0.80251	0.286973
63.92	0.414537	0.317999	0.283404	0.930944	0.810453	0.286646
64.25	0.417174	0.314843	0.281299	0.936462	0.805423	0.284522
64.58	0.420891	0.31764	0.286512	0.945222	0.813371	0.287006
64.92	0.421259	0.315867	0.286064	0.944453	0.813253	0.284693
65.25	0.420902	0.315991	0.282148	0.950609	0.801766	0.287141
65.58	0.42353	0.317489	0.282611	0.950078	0.807699	0.286868
65.92	0.428924	0.317241	0.283436	0.955468	0.81456	0.286599
66.25	0.42662	0.31839	0.282849	0.956706	0.808952	0.284195
66.58	0.422912	0.318911	0.282473	0.961769	0.81677	0.28397
66.92	0.425864	0.32114	0.28424	0.968555	0.814467	0.284333
67.25	0.43109	0.318584	0.283921	0.96045	0.816083	0.285529
67.58	0.433614	0.319239	0.281891	0.966348	0.823301	0.285096
67.92	0.4306	0.31982	0.281271	0.975174	0.82107	0.281504
68.25	0.431604	0.318715	0.282367	0.971312	0.816781	0.284161
68.58	0.4318	0.320901	0.283315	0.972388	0.823262	0.28741
68.92	0.434403	0.321363	0.281866	0.980319	0.824446	0.283655
69.25	0.434882	0.320972	0.285337	0.97708	0.819653	0.28608
69.58	0.436015	0.321338	0.282524	0.98451	0.823977	0.286295
69.92	0.435137	0.321105	0.280675	0.994836	0.821309	0.284309
70.25	0.435798	0.320559	0.28134	0.976967	0.82692	0.281118
70.58	0.43709	0.319368	0.281577	0.987744	0.825626	0.282521
70.92	0.437273	0.320129	0.281497	0.989078	0.828019	0.284406
71.25	0.440742	0.318088	0.280281	0.988915	0.817064	0.282123
71.58	0.439621	0.322832	0.283517	0.998982	0.831848	0.28407
71.92	0.441747	0.320258	0.2814	0.994383	0.83053	0.283986
72.25	0.44259	0.320378	0.284628	1.00334	0.832574	0.284121
72.58	0.448585	0.32201	0.282519	1.01414	0.838163	0.284385
72.92	0.444212	0.320657	0.282164	1.00433	0.82369	0.285629
73.25	0.445244	0.320709	0.282039	1.02112	0.828622	0.285014
73.58	0.449948	0.322835	0.281089	1.0118	0.833957	0.28586
73.92	0.448502	0.323006	0.282185	1.02252	0.84205	0.284313
74.25	0.451945	0.32285	0.282389	1.01902	0.835511	0.284304
74.58	0.451726	0.324393	0.283255	1.01986	0.836413	0.284311
74.92	0.452648	0.325122	0.283325	1.02527	0.837934	0.285509
75.25	0.452344	0.321629	0.282641	1.02639	0.830785	0.283986
75.58	0.454611	0.324123	0.281416	1.03021	0.835137	0.282281
75.92	0.456959	0.321205	0.283204	1.03772	0.838871	0.283298
76.25	0.459546	0.32266	0.282547	1.03515	0.844422	0.281875
76.58	0.458718	0.32519	0.280896	1.04043	0.844716	0.281383
76.92	0.461593	0.324578	0.280797	1.0369	0.843556	0.284748
77.25	0.464007	0.325847	0.282078	1.03196	0.838057	0.283704
77.58	0.464006	0.323418	0.282547	1.04817	0.847946	0.284723
77.92	0.46499	0.327433	0.28196	1.03364	0.840787	0.281119
78.25	0.464536	0.326035	0.28192	1.03578	0.843051	0.285347
78.58	0.465863	0.324191	0.280764	1.04439	0.845075	0.284096
78.92	0.466488	0.326809	0.282696	1.07188	0.838848	0.284482
79.25	0.470446	0.326291	0.281691	1.0523	0.839792	0.280684
79.58	0.46697	0.324633	0.281439	1.05654	0.842219	0.281425
79.92	0.467816	0.326681	0.281346	1.05088	0.843688	0.281942
80.25	0.471881	0.327411	0.284021	1.05831	0.843094	0.282021
80.58	0.472856	0.328586	0.283322	1.06856	0.846621	0.281318
80.92	0.469938	0.326991	0.280849	1.06453	0.842745	0.280995
81.25	0.472187	0.329213	0.281977	1.08304	0.841538	0.283181
81.58	0.472846	0.326626	0.280732	1.06854	0.841137	0.280719
81.92	0.47638	0.326487	0.281084	1.07314	0.843121	0.281822
82.25	0.476804	0.32598	0.282133	1.07565	0.852601	0.280193
82.58	0.480247	0.327952	0.280917	1.08681	0.85441	0.28013
82.92	0.478074	0.327975	0.284139	1.07212	0.841503	0.280157
83.25	0.479284	0.330819	0.28262	1.07749	0.8509	0.28281
83.58	0.481761	0.327706	0.283398	1.07594	0.855541	0.281426
83.92	0.482463	0.329848	0.279982	1.07591	0.857093	0.282297
84.25	0.480801	0.327756	0.279431	1.0744	0.849816	0.281642
84.58	0.481309	0.328485	0.28067	1.08917	0.854614	0.281286
84.92	0.485357	0.327573	0.280253	1.0945	0.845036	0.281076
85.25	0.48761	0.331623	0.281271	1.09914	0.849132	0.283389
85.58	0.487791	0.329976	0.282319	1.0964	0.848342	0.281156
85.92	0.486919	0.327891	0.282412	1.08715	0.856483	0.283209
86.25	0.489339	0.331379	0.281932	1.10172	0.852956	0.282931
86.58	0.49018	0.330907	0.282447	1.11399	0.84781	0.281152
86.92	0.490597	0.333853	0.279034	1.10271	0.854389	0.280346
87.25	0.493189	0.330609	0.280146	1.10784	0.851613	0.279667
87.58	0.492828	0.33007	0.281217	1.10798	0.859075	0.281656
87.92	0.494174	0.330593	0.28179	1.11409	0.85099	0.281858
88.25	0.497121	0.330445	0.28025	1.11006	0.859493	0.283126
88.58	0.494978	0.331215	0.281619	1.12049	0.850097	0.278113
88.92	0.497166	0.333203	0.279871	1.12768	0.862324	0.280027
89.25	0.497706	0.332008	0.281765	1.11207	0.849899	0.282685
89.58	0.497899	0.331468	0.280547	1.11667	0.85251	0.282451
89.92	0.501707	0.334796	0.276934	1.11614	0.850318	0.278391
90.25	0.504764	0.332454	0.280033	1.12845	0.85967	0.276902
90.58	0.503312	0.330705	0.281203	1.1217	0.857588	0.278443
90.92	0.503341	0.335764	0.281094	1.12509	0.856063	0.280065
91.25	0.503414	0.331215	0.279991	1.11297	0.850437	0.280818

## Sheet: Fig3 panel H
	slope measurement	prep1-meas1	prep1-meas2	prep2-meas1	prep2-meas2	average	std. dev.
PaPBP1B	15-30 min	0.00399147	0.00413172	0.00171789	0.00150691
+LpoP	5-15 min	0.0160289	0.0158793	0.00714249	0.00715887
PaPBP1B						1	0.0478454
+LpoP	relative slope	4.01579	3.84326	4.15772	4.7507	4.19187	0.39412
