# Supplementary figures and images for: Real-time monitoring of peptidoglycan synthesis by membrane-reconstituted penicillin-binding proteins
Source: eLife journal article supplement (doi:10.7554/elife.61525), 2021-02-24

Figure 1 – Figure supplement 1

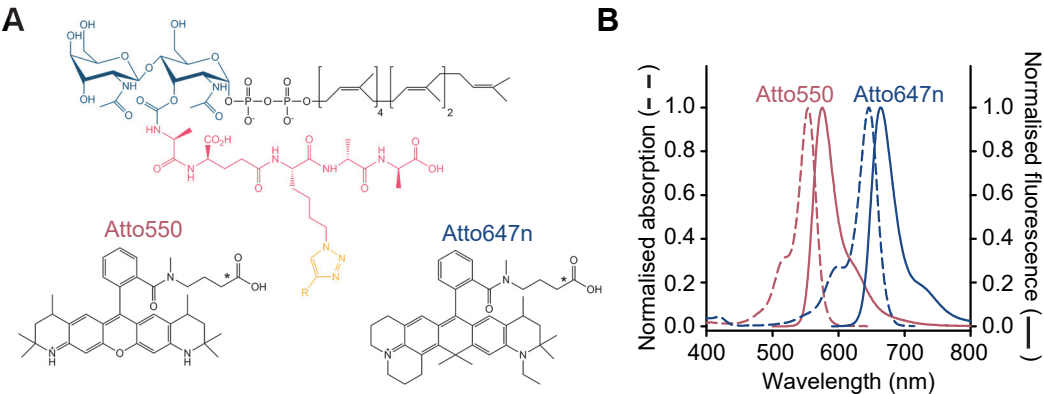

Supplement: supp [file elife_poa_e61525_Figure_1_figure_supplement_1.pdf › elife_poa_e61525_Figure_1_figure_supplement_1.pdf]

Figure 1 – Figure supplement 2

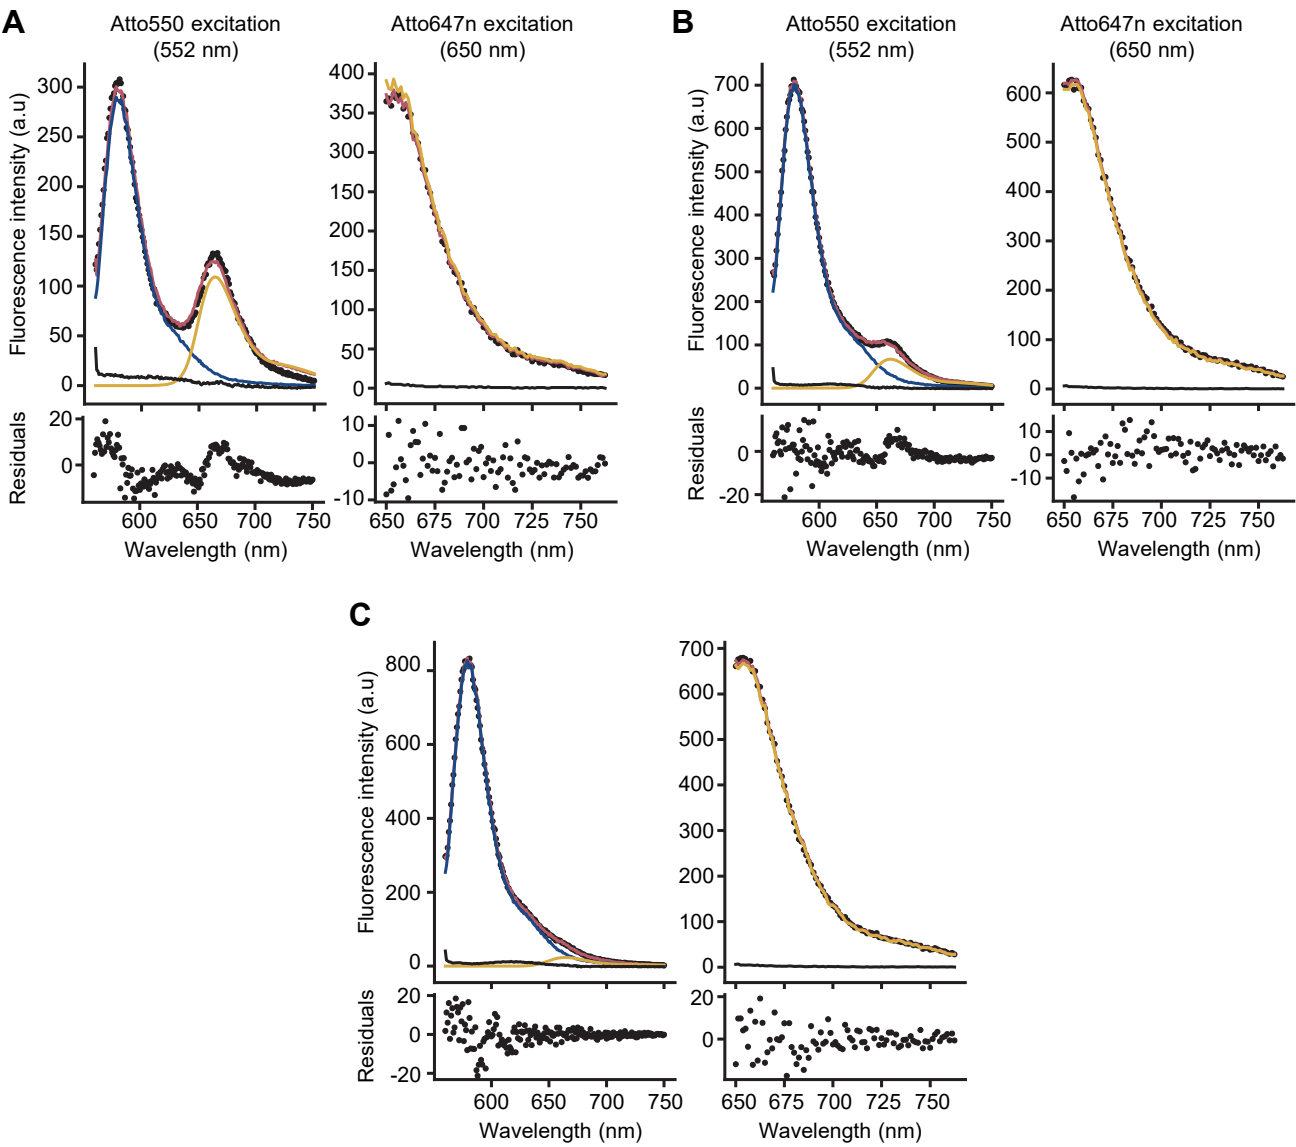

Supplement: supp [file elife_poa_e61525_Figure_1_figure_supplement_2.pdf › elife_poa_e61525_Figure_1_figure_supplement_2.pdf]

Figure 1 – Figure supplement 3

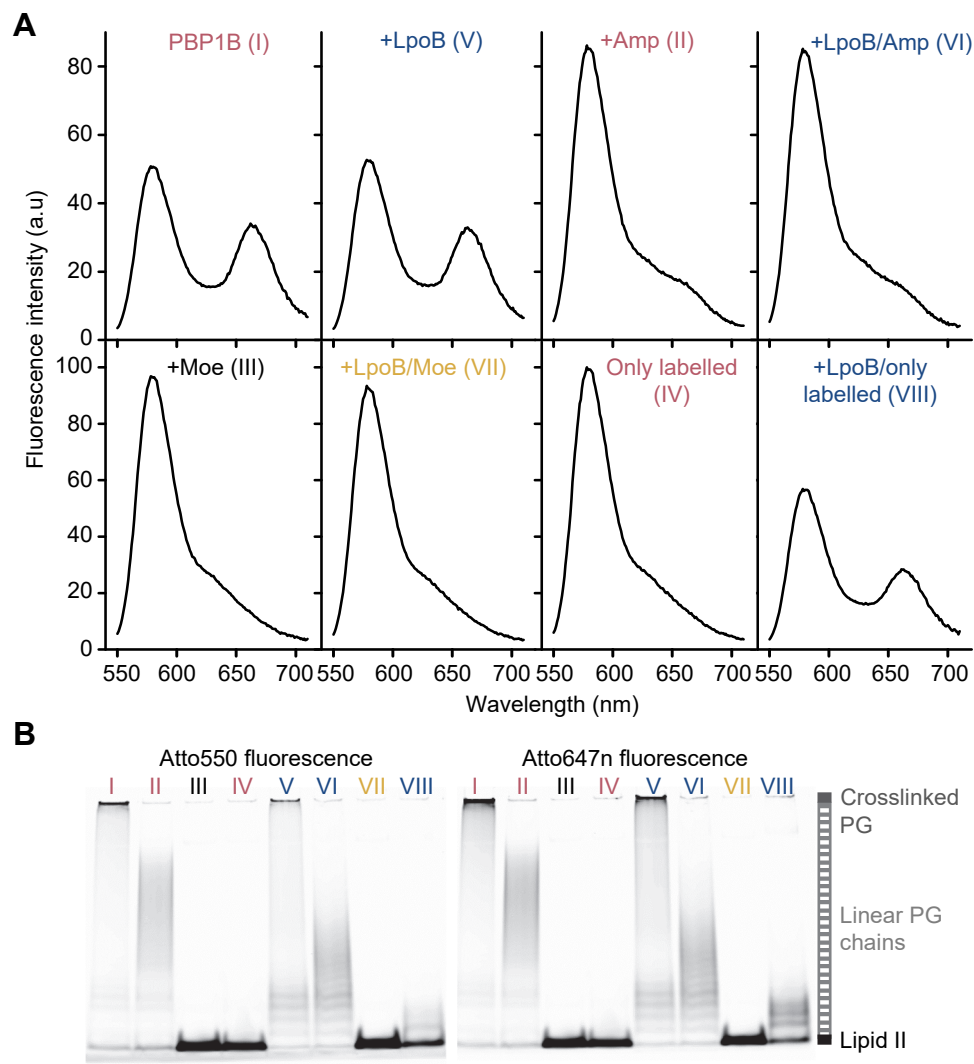

Supplement: supp [file elife_poa_e61525_Figure_1_figure_supplement_3.pdf › elife_poa_e61525_Figure_1_figure_supplement_3.pdf]

Figure 1 – Figure supplement 4

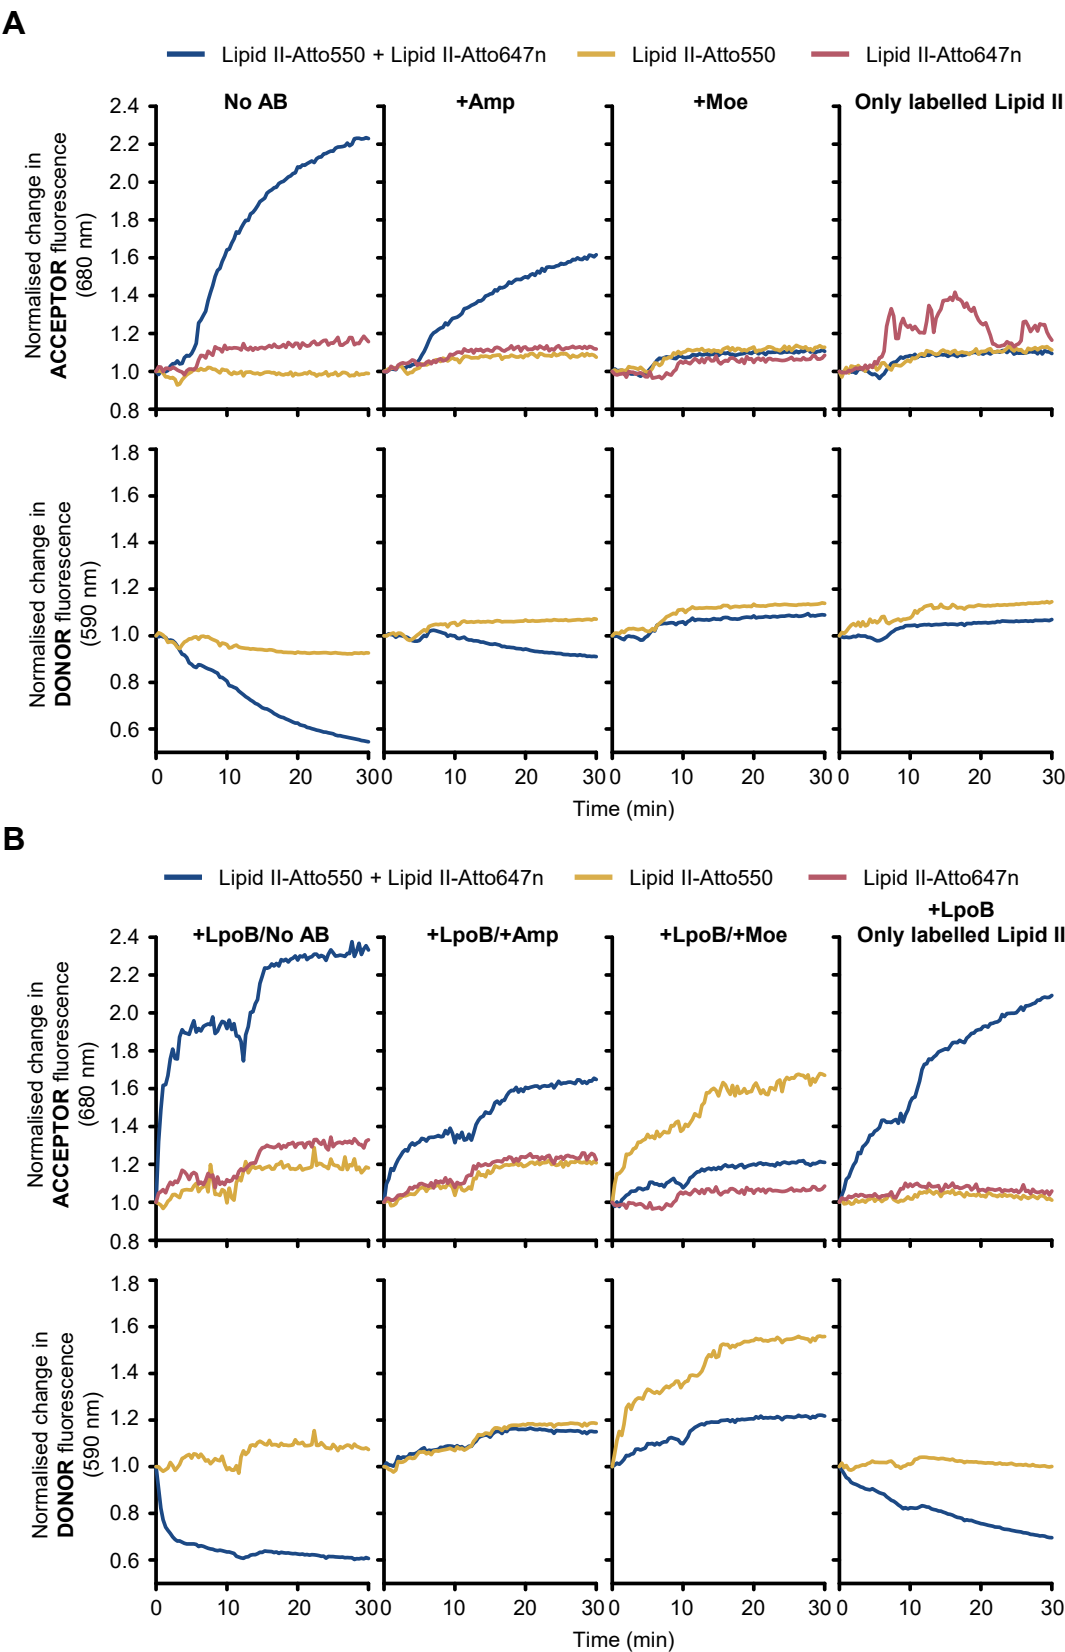

Supplement: supp [file elife_poa_e61525_Figure_1_figure_supplement_4.pdf › elife_poa_e61525_Figure_1_figure_supplement_4.pdf]

Figure 2 – Figure supplement 1

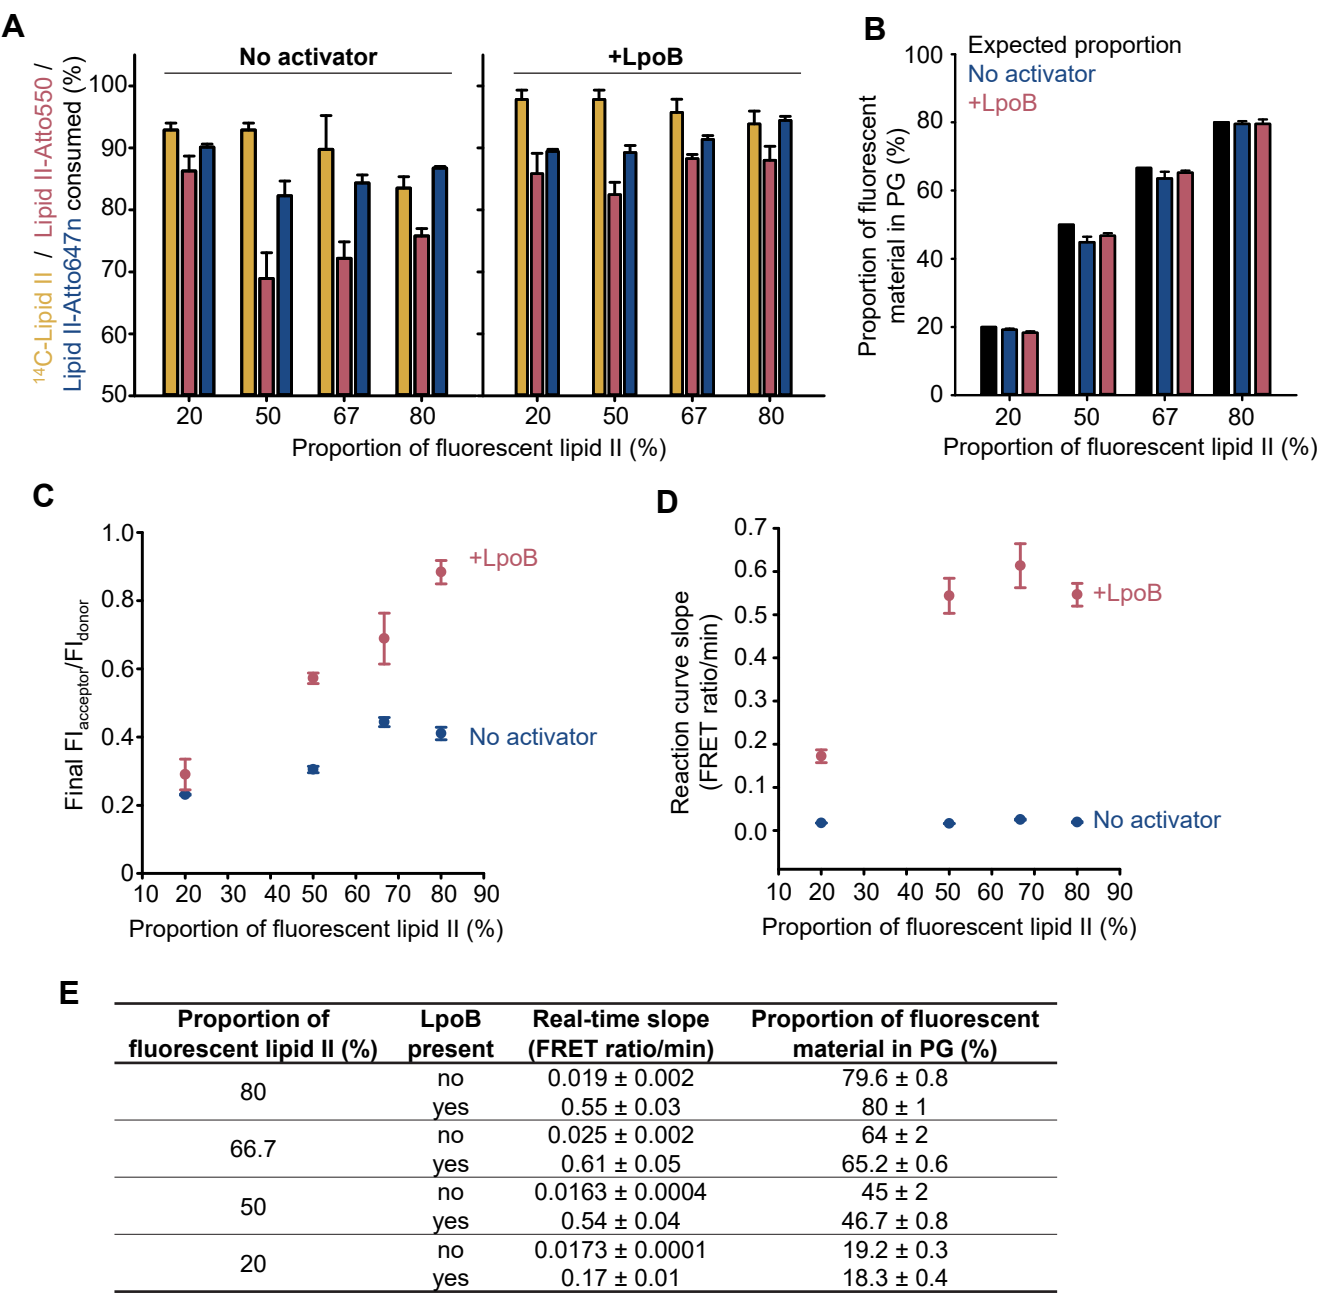

Supplement: supp [file elife_poa_e61525_Figure_2_figure_supplement_1.pdf › elife_poa_e61525_Figure_2_figure_supplement_1.pdf]

Figure 3 – Figure supplement 1

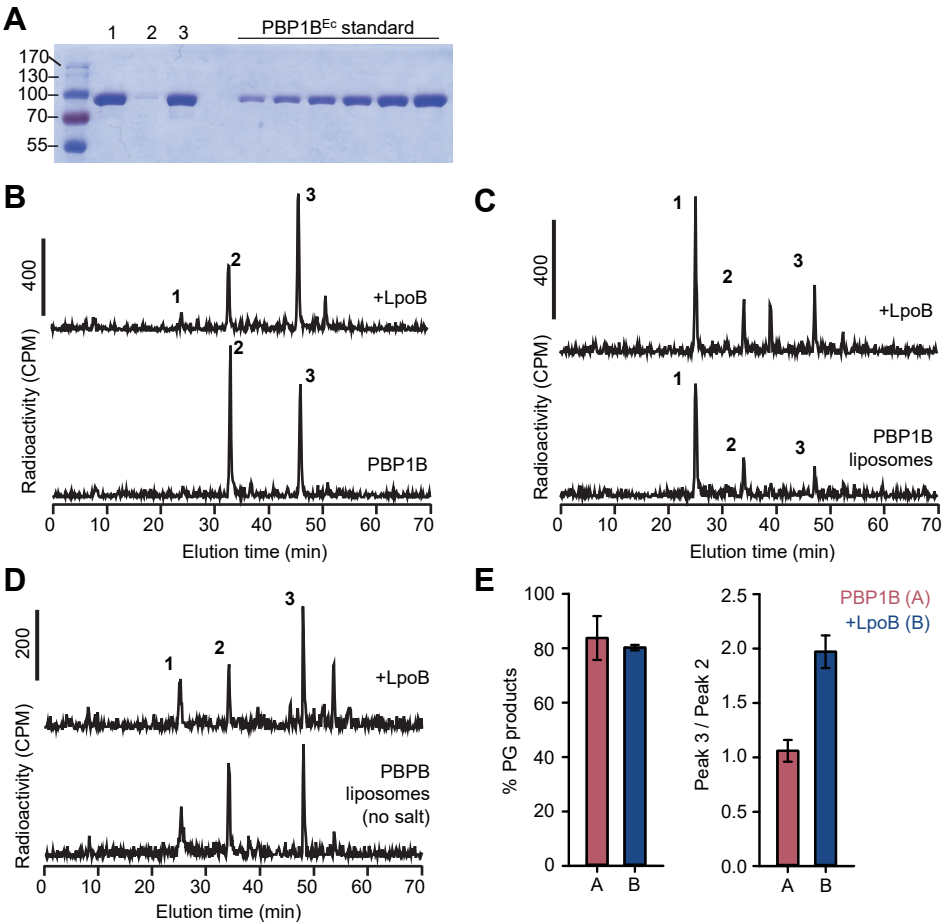

Supplement: supp [file elife_poa_e61525_Figure_3_figure_supplement_1.pdf › elife_poa_e61525_Figure_3_figure_supplement_1.pdf]

Figure 3 – Figure supplement 2

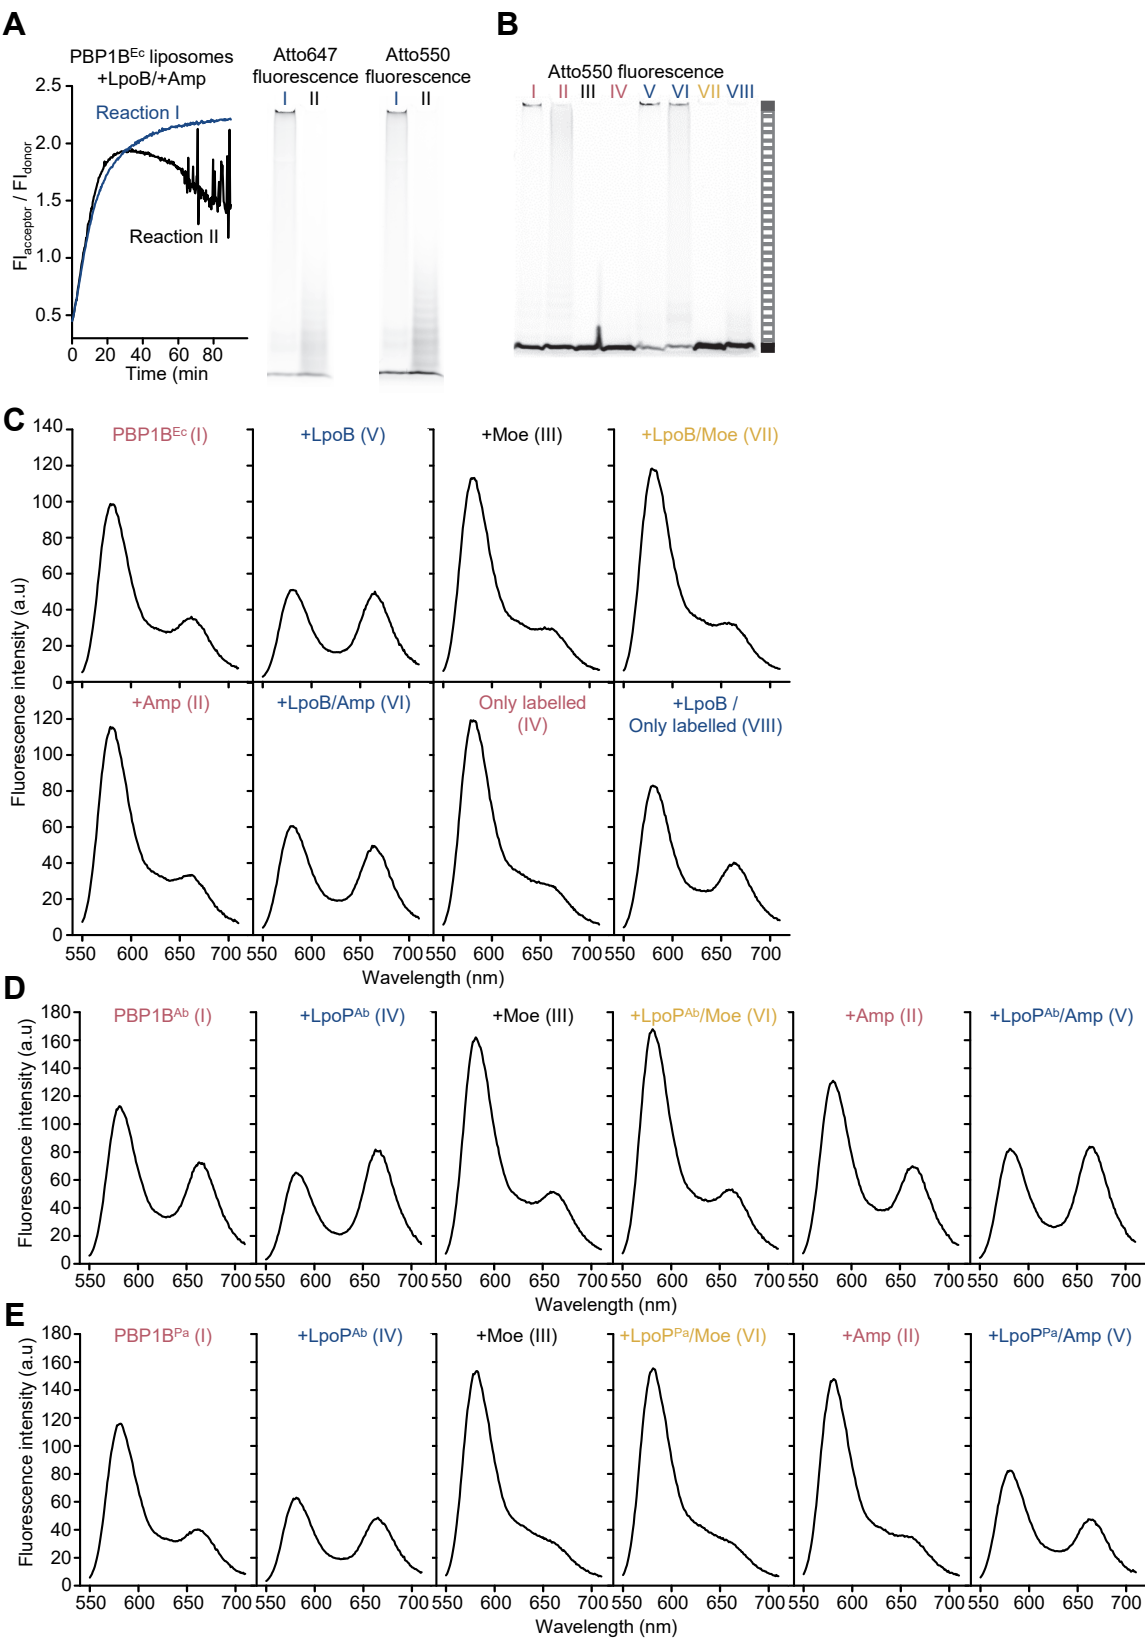

Supplement: supp [file elife_poa_e61525_Figure_3_figure_supplement_2.pdf › elife_poa_e61525_Figure_3_figure_supplement_2.pdf]

Figure 3 – Figure supplement 3

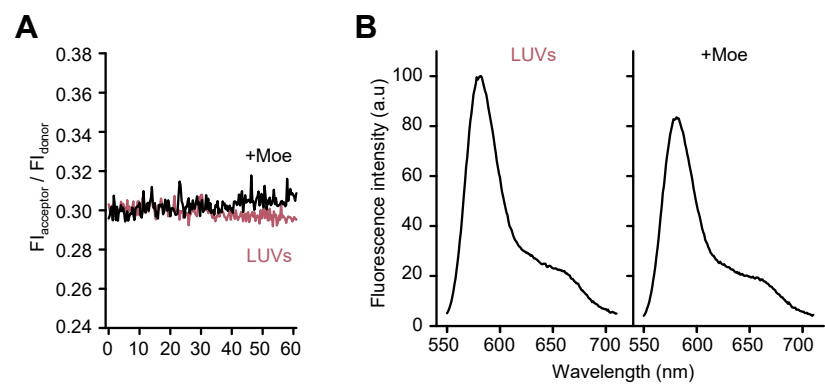

Supplement: supp [file elife_poa_e61525_Figure_3_figure_supplement_3.pdf › elife_poa_e61525_Figure_3_figure_supplement_3.pdf]

Figure 3 – Figure supplement 4

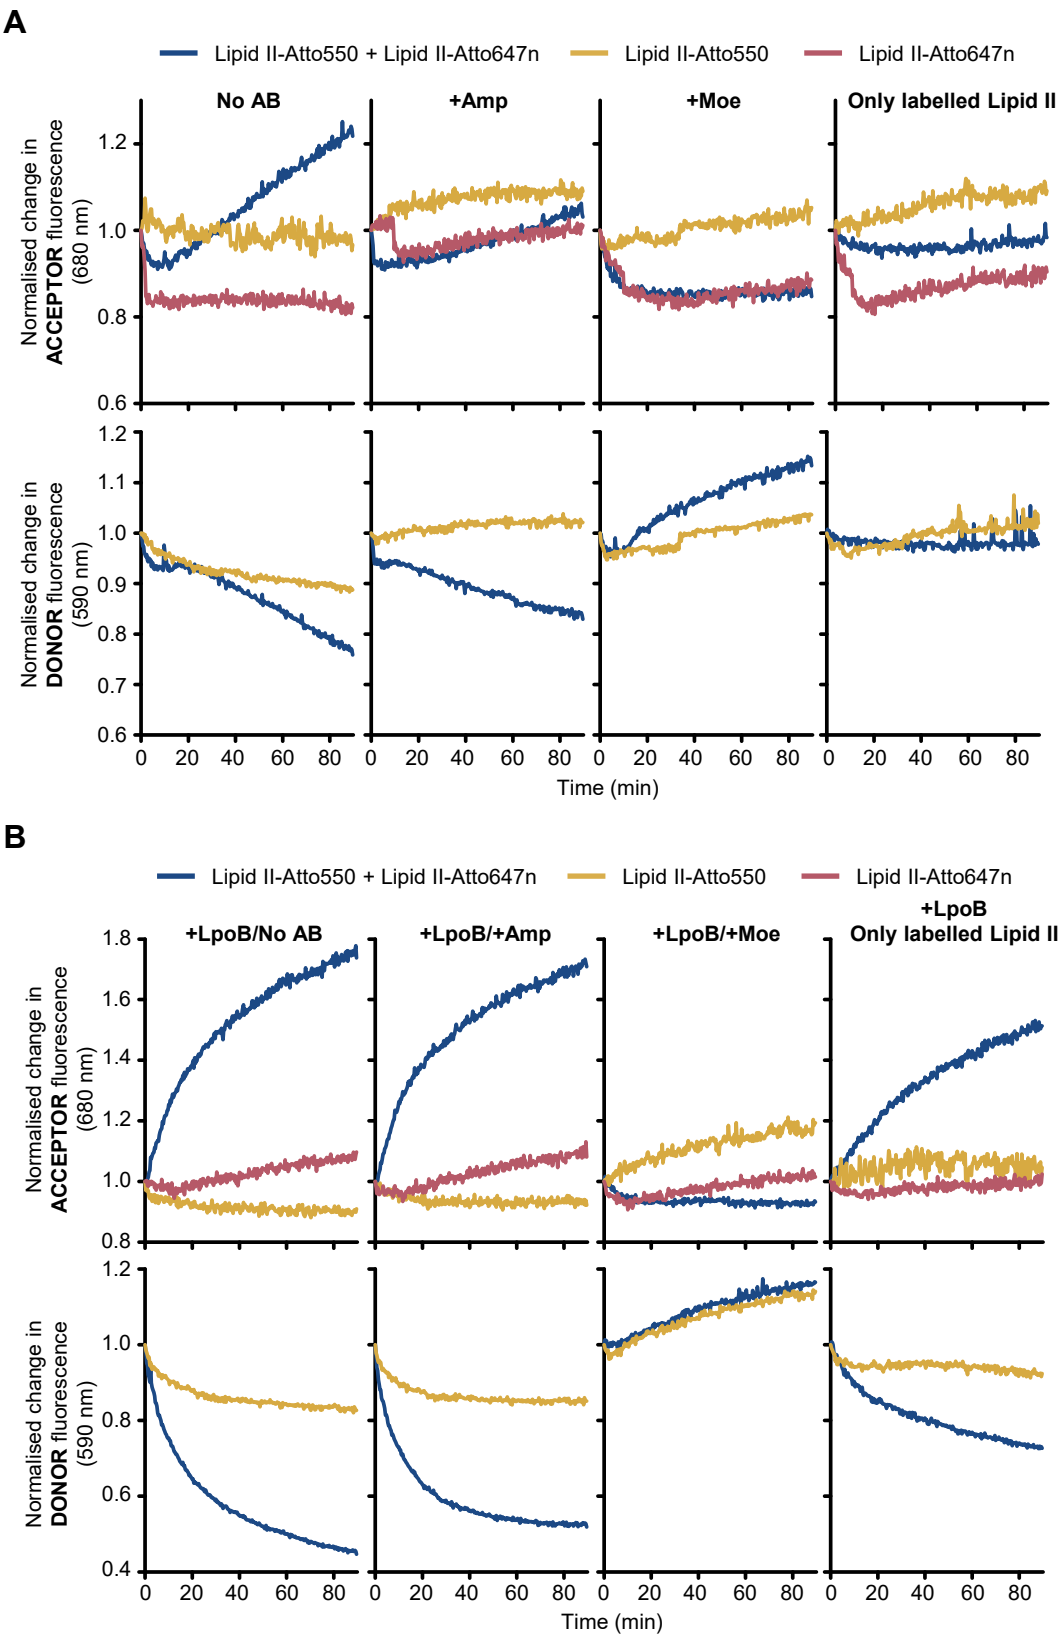

Supplement: supp [file elife_poa_e61525_Figure_3_figure_supplement_4.pdf › elife_poa_e61525_Figure_3_figure_supplement_4.pdf]

Figure 3 – Figure supplement 5

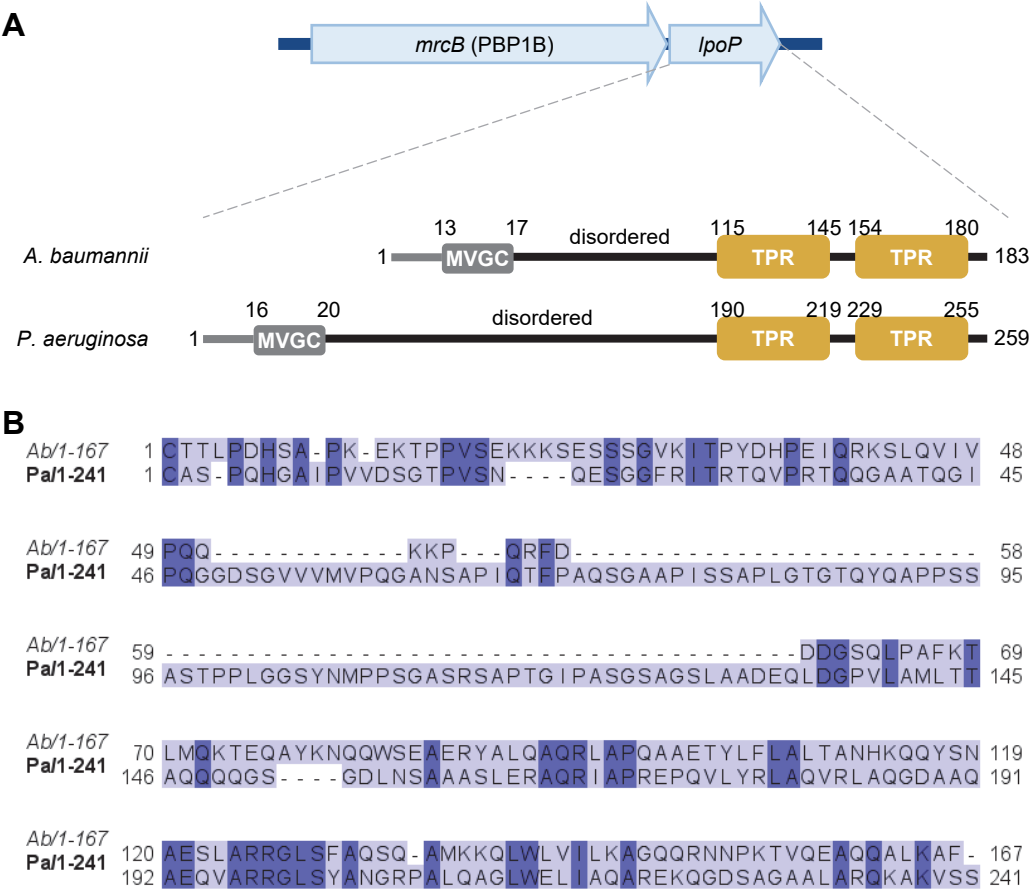

Supplement: supp [file elife_poa_e61525_Figure_3_figure_supplement_5.pdf › elife_poa_e61525_Figure_3_figure_supplement_5.pdf]

Figure 3 – Figure supplement 6

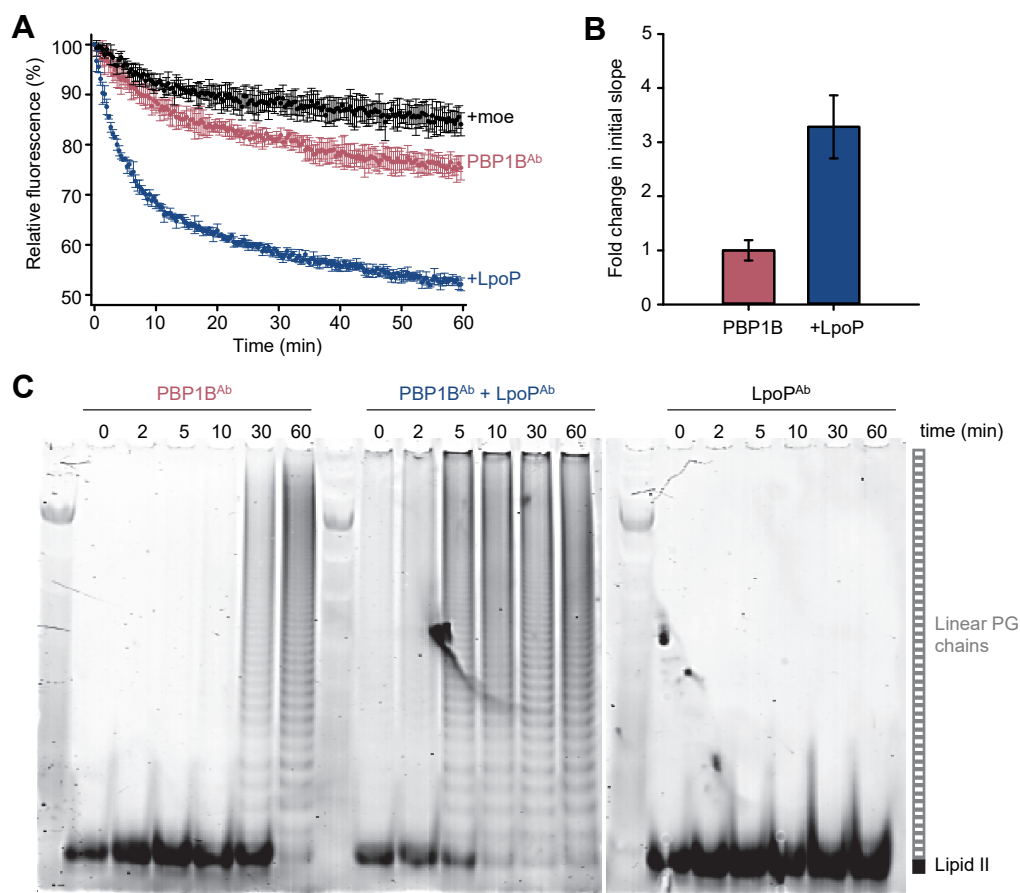

Supplement: supp [file elife_poa_e61525_Figure_3_figure_supplement_6.pdf › elife_poa_e61525_Figure_3_figure_supplement_6.pdf]

Figure 3 – Figure supplement 7

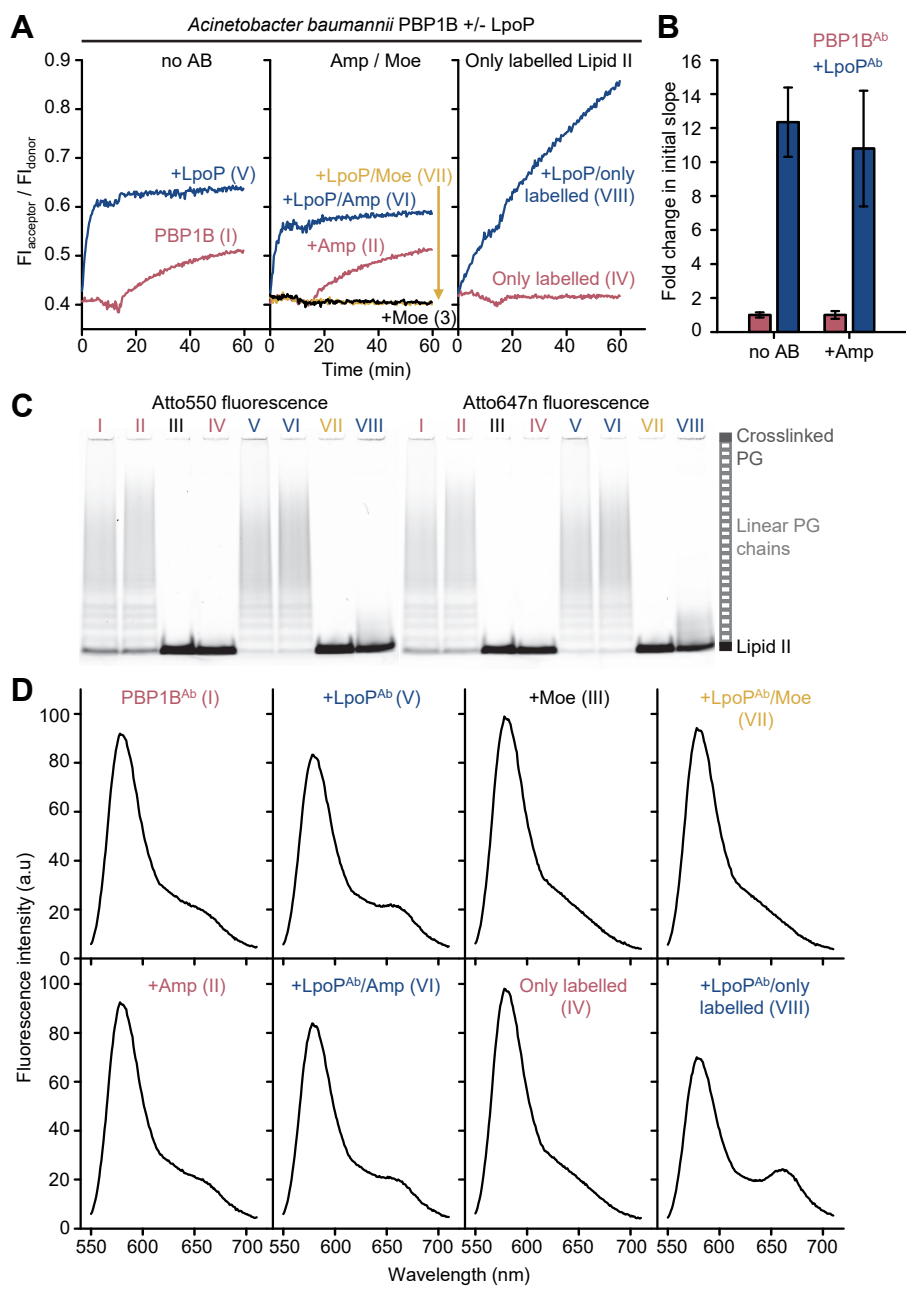

Supplement: supp [file elife_poa_e61525_Figure_3_figure_supplement_7.pdf › elife_poa_e61525_Figure_3_figure_supplement_7.pdf]

Figure 3 – Figure supplement 8

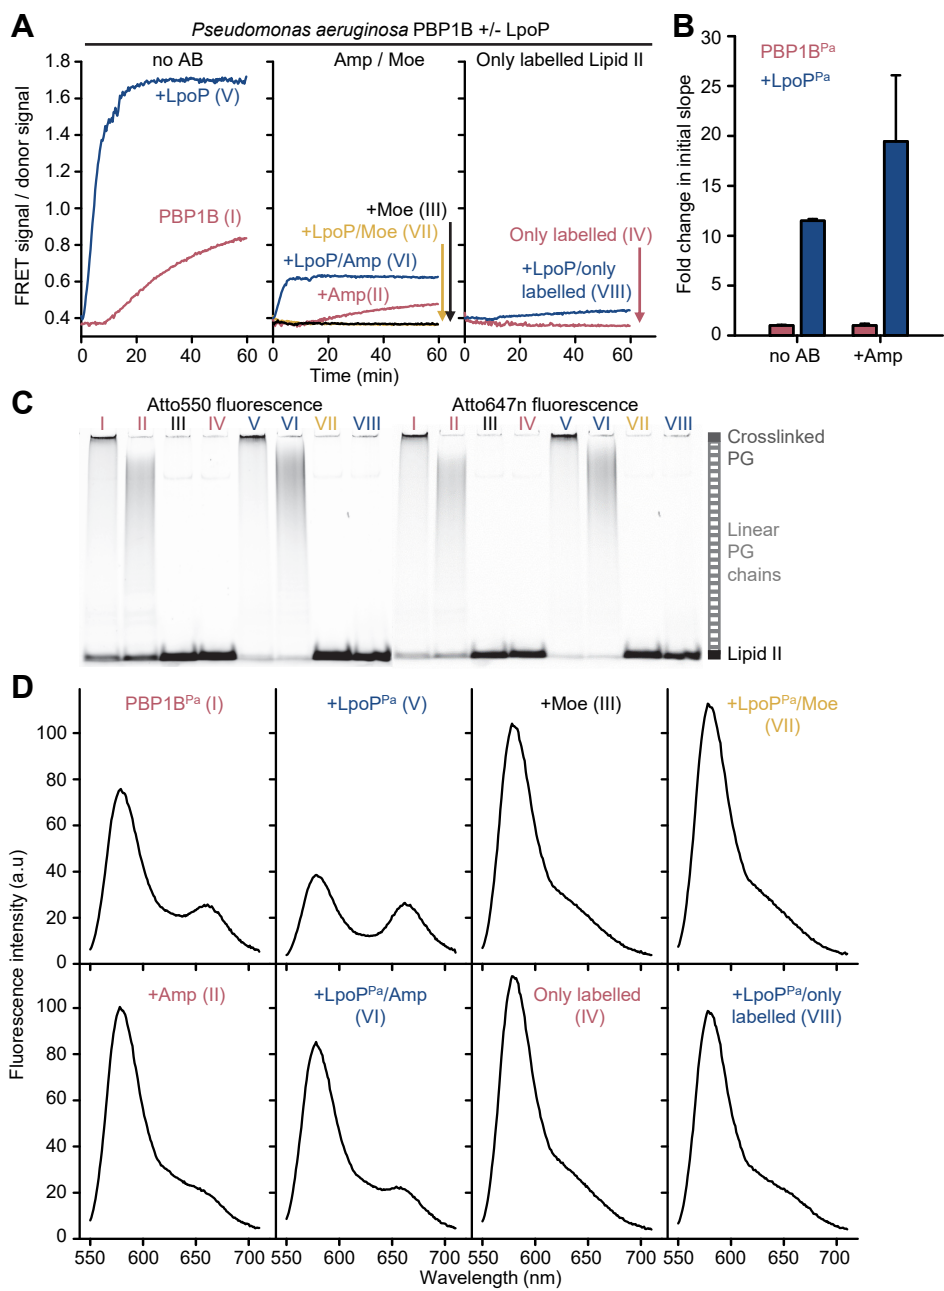

Supplement: supp [file elife_poa_e61525_Figure_3_figure_supplement_8.pdf › elife_poa_e61525_Figure_3_figure_supplement_8.pdf]

Figure 4 – Figure supplement 1

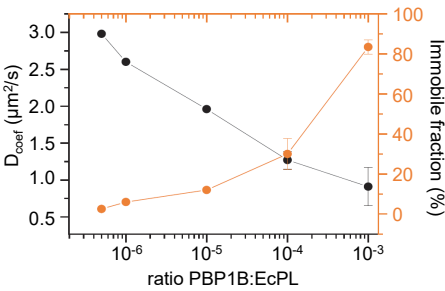

Supplement: supp [file elife_poa_e61525_Figure_4_figure_supplement_1.pdf › elife_poa_e61525_Figure_4_figure_supplement_1.pdf]

Figure 4 – Figure supplement 2

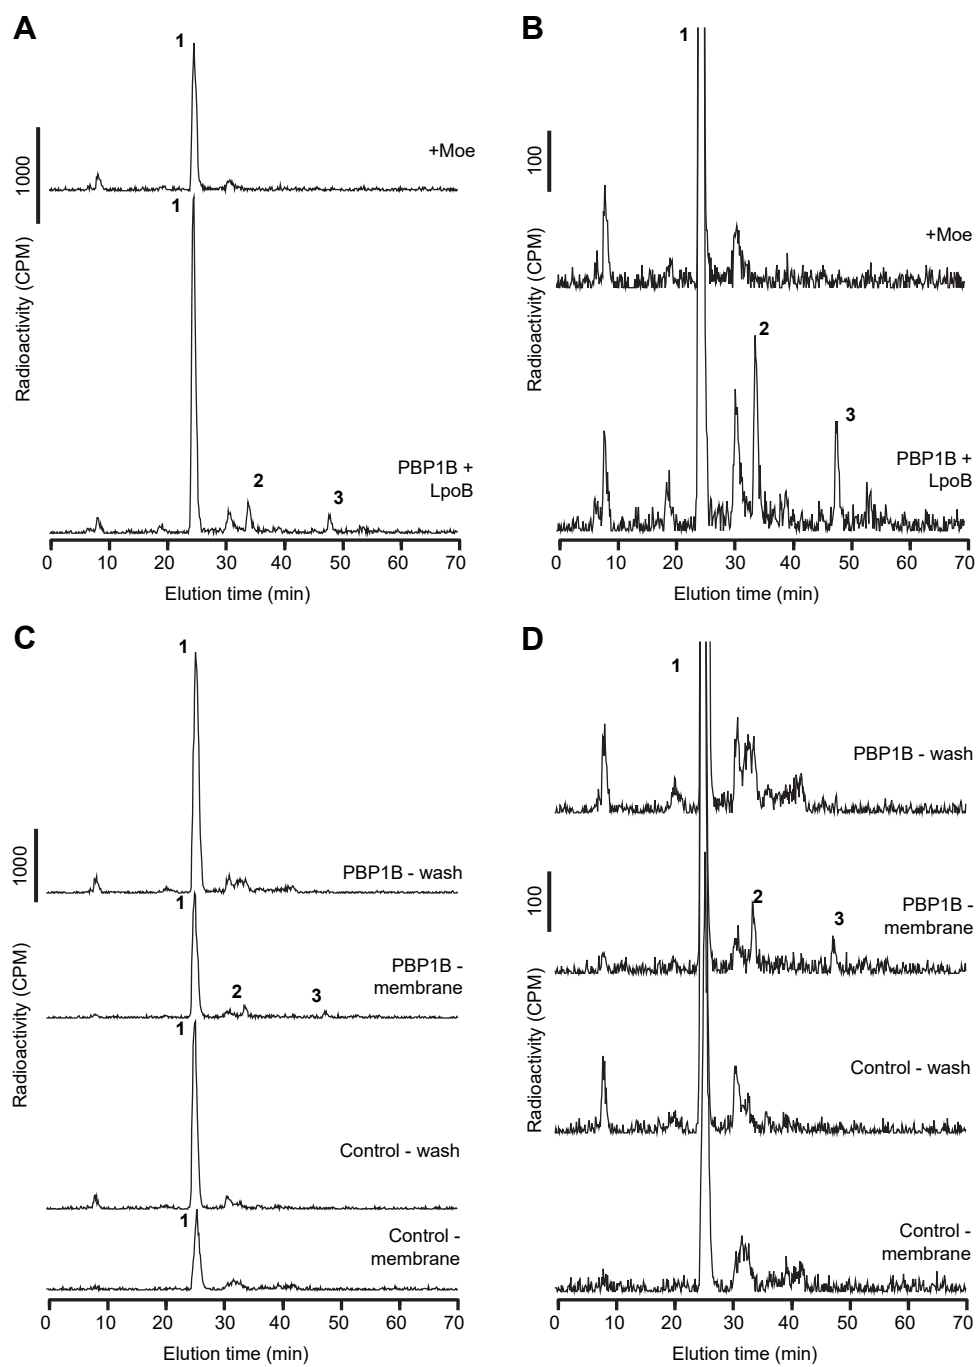

Supplement: supp [file elife_poa_e61525_Figure_4_figure_supplement_2.pdf › elife_poa_e61525_Figure_4_figure_supplement_2.pdf]

Figure 5 – Figure supplement 1

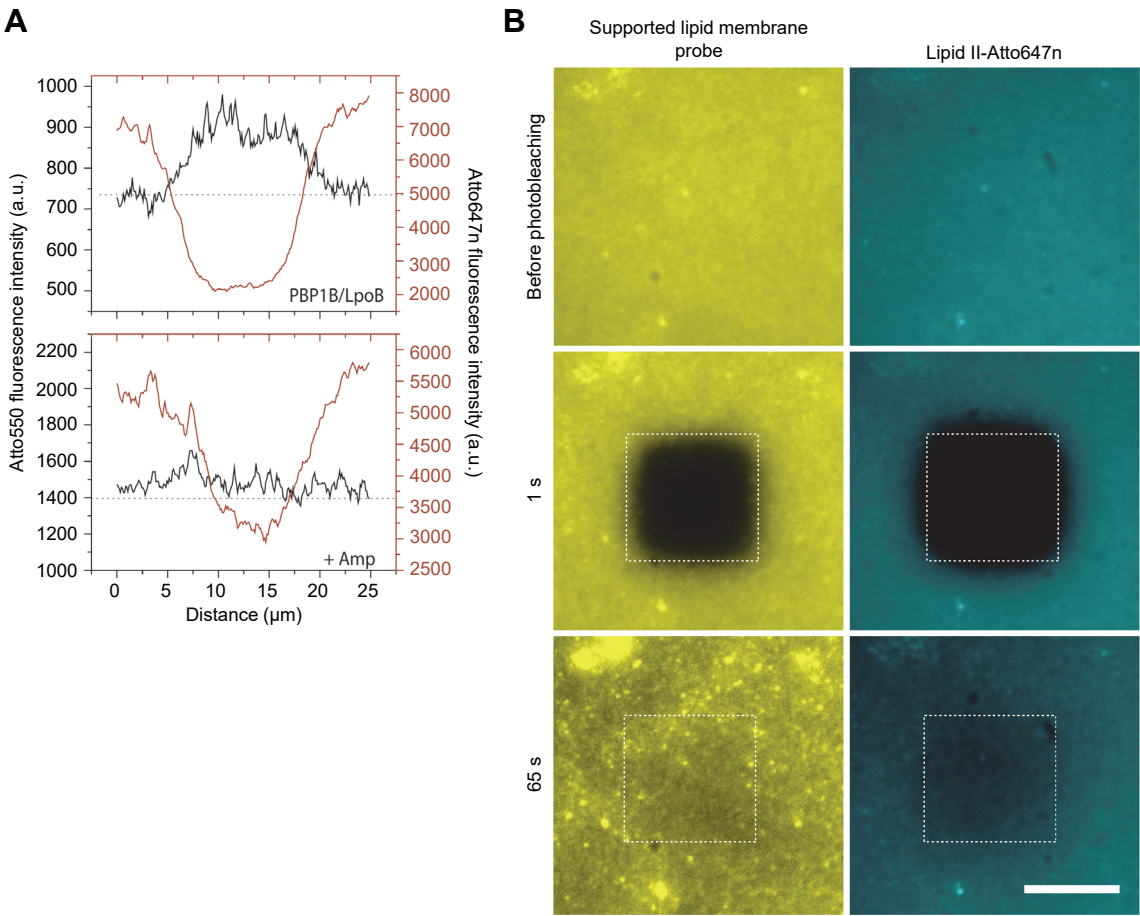

Supplement: supp [file elife_poa_e61525_Figure_5_figure_supplement_1.pdf › elife_poa_e61525_Figure_5_figure_supplement_1.pdf]
